# Supplementary material for: Isobaric crosslinking mass spectrometry technology for studying conformational and structural changes in proteins and complexes
Source: bioRxiv preprint, doi:10.1101/2022.12.02.518925, version 4 (2024-09-23)
Supplement: Table S1 [file 518925_file03.xlsx]

## Sheet: Interlinks_Exp_I
index	Protein-protein	Crosslinkingsites	Xcorr	Average(log2(127/126))	Average(log2(126/127))	Da	ppm	spectrum	engine	xcorr	Xcorr_norm	expect	immonium1	ion1	dot1	connective1	peptide1	protein1	Unique_protein1	subunit1	realpep1	position1	immonium2	ion2	dot2	connective2	peptide2	protein2	Unique_protein2	subunit2	realpep2	position2	Q2link0intensity	Q2link1intensity	corrected_126	Corrected_127	ratio127/126	log2ratio127/126	adjustedLog2127/126
1	RPB1---RPB10
	1	RPB10:59---RPB1:728	7.0845	0.657796	-0.657796
						0	4.34341	JL102921_110821_RPB4_C1_100B.24139.24139.4	P	7.0845	0.246323	0.098	//17	23//87	7.003	2.5	R.M[147.04]ILTHVDLIEK[952.55]FLR.Y	YOR210W	1	RPB10	MILTHVDLIEKFLR	59	//5	2//19	0.0815	0.2	R.DK[2150.24]AGR.L	YDL140C	1	RPB1	DKAGR	728	439258	320841	480654	304660	1.57767	0.657796	0.465796
2	RPB1---RPB11
	1	RPB11:55---RPB1:941	3.81975	-0.211008	0.211008
						0	1.28454	JL102921_110821_RPB4_C1_70B.12720.12720.4	P	3.81975	0.179867	0.000354	//9	11//40	3.60925	2.0625	R.K[969.62]VLFAAYK.V	YOL005C	1	RPB11	KVLFAAYK	55	//5	2//21	0.2105	0.5	R.K[1345.82]FLR.E	YDL140C	2	RPB1	KFLR	941	922336	1146594	1.00351e+06	1.16156e+06	0.863933	-0.211008	-0.403008
	2	RPB11:55---RPB1:2	8.5205	-0.141009	0.141009
						-1	4.6003	JL102921_110821_RPB4_C1_70B.17160.17160.5	N	8.5205	0.341825		2//17	26//129	5.33825	2.03125	R.K[1611.87]VLFAAYKVEHPFFAR.F	YOL005C	1	RPB11	KVLFAAYKVEHPFFAR	55	//	12//44	3.18225	0.775	M.V[2300.28]GQQYSSAPLR.T	YDL140C	1	RPB1	VGQQYSSAPLR	2	321973	383064	350517	386507	0.906885	-0.141009	-0.333009
	3	RPB11:72---RPB1:843	9.7115	0.557401	-0.557401
						0	0.329053	JL102921_110821_RPB4_C1_D.17478.17478.5	P	9.7115	0.351192	0.616	1//19	25//135	9.485	2.05882	R.LVK[969.62]ALEDIM[147.04]VHYDNTTR.N	YDL140C	1	RPB1	LVKALEDIMVHYDNTTR	843	//4	2//19	0.2265	0.5	R.FK[2440.29]LR.I	YOL005C	1	RPB11	FKLR	72	296438	229851	324213	220311	1.47162	0.557401	0.365401
	4	RPB11:20---RPB1:941	12.9545	-0.238811	0.238811
						0	1.02152	JL102921_110821_RPB4_C1_D.25618.25618.6	P	12.9545	0.338702	0.335	1//16	44//240	12.8835	1.94828	K.LK[969.62]IDPDTK[425.27]APNAVVITFEKEDHTLGNLIR.A	YOL005C	1	RPB11	LKIDPDTKAPNAVVITFEKEDHTLGNLIR	20	//5	1//23	0.071	0.125	R.K[3951.2]FLR.E	YDL140C	2	RPB1	KFLR	941	364910	461634	396927	468382	0.847443	-0.238811	-0.430811
	5	RPB11:62---RPB1:941	9.6975	0.158707	-0.158707
						0	2.06167	JL102921_110821_RPB4_C1_D.18519.18519.5	P	9.6975	0.279963	0.117	//18	28//123	9.2435	2.40625	R.KVLFAAYK[969.62]VEHPFFAR.F	YOL005C	1	RPB11	KVLFAAYKVEHPFFAR	62	//5	4//23	0.454	1	R.K[2329.32]FLR.E	YDL140C	2	RPB1	KFLR	941	728655	811264	793931	813298	0.976186	-0.0347716	-0.226772
						0	4.04937	JL102921_110821_RPB4_C1_D.19360.19360.5	P	8.84425	0.273224	0.135	//18	28//123	8.17725	2.40625	R.KVLFAAYK[969.62]VEHPFFAR.F	YOL005C	1	RPB11	KVLFAAYKVEHPFFAR	62	//5	5//23	0.667	1.125	R.K[2329.32]FLR.E	YDL140C	2	RPB1	KFLR	941	415811	609036	451285	625315	0.721692	-0.470544	-0.662544
						0	4.90571	JL102921_110821_RPB4_C1_D.20990.20990.5	P	7.636	0.271845	0.186	//16	29//131	7.587	2.53125	R.K[425.27]VLFAAYK[969.62]VEHPFFAR.F	YOL005C	1	RPB11	KVLFAAYKVEHPFFAR	62	//5	1//23	0.049	0.125	R.K[2626.49]FLR.E	YDL140C	2	RPB1	KFLR	941	1.19124e+06	738224	1.3051e+06	680695	1.91731	0.939082	0.747082
						0	6.00248	JL102921_110821_RPB4_C1_D.20677.20677.5	P	7.29775	0.276477	0.341	//16	29//131	7.24925	2.53125	R.K[425.27]VLFAAYK[969.62]VEHPFFAR.F	YOL005C	1	RPB11	KVLFAAYKVEHPFFAR	62	//5	1//23	0.0485	0.125	R.K[2626.49]FLR.E	YDL140C	2	RPB1	KFLR	941	1.10711e+06	648384	1.2134e+06	591016	2.05307	1.03778	0.845782
						0	-0.452964	JL102921_110821_RPB4_C1.17134.17134.4	P	7.1715	0.201498	0.221	//17	18//89	7.131	1.86667	K.VLFAAYK[969.62]VEHPFFAR.F	YOL005C	1	RPB11	VLFAAYKVEHPFFAR	62	//5	1//18	0.0405	0.125	R.K[2201.22]FLR.E	YDL140C	2	RPB1	KFLR	941	2.59759e+06	3723962	2.82018e+06	3.8173e+06	0.73879	-0.436764	-0.628764
						0	0.1844	JL102921_110821_RPB4_C1_D.18154.18154.5	P	4.9845	0.174882	0.607	//18	19//123	4.824	1.53125	R.KVLFAAYK[969.62]VEHPFFAR.F	YOL005C	1	RPB11	KVLFAAYKVEHPFFAR	62	//5	3//23	0.1605	0.625	R.K[2329.32]FLR.E	YDL140C	2	RPB1	KFLR	941	421063	482973	458611	485616	0.94439	-0.0825456	-0.274546
	6	RPB11:26---RPB1:644	13.5777	-0.654383	0.654383
						-1	2.09981	JL102921_110821_RPB4_C1_30B.22280.22280.6	N	13.5777	0.343801		//14	34//158	12.1698	1.80769	K.IDPDTK[2223.22]APNAVVITFEKEDHTLGNLIR.A	YOL005C	1	RPB11	IDPDTKAPNAVVITFEKEDHTLGNLIR	26	1//18	10//90	1.408	0.766667	R.EKGPQVC[160.03]AK[3412.83]LFGNIQK.V	YDL140C	1	RPB1	EKGPQVCAKLFGNIQK	644	332346	592473	359415	616421	0.583067	-0.778267	-0.970267
						-60	1.74958	JL102921_110821_RPB4_C1_30B.22540.22540.6	P	11.0188	0.267709	0.114	3//12	34//233	9.18275	1.44828	K.LKIDPDTK[1909.07]APNAVVITFEKEDHTLGNLIR.A	YOL005C	1	RPB11	LKIDPDTKAPNAVVITFEKEDHTLGNLIR	26	//16	8//93	1.836	0.714286	K.GPQVCAK[3654.02]LFGNIQK.V	YDL140C	1	RPB1	GPQVCAKLFGNIQK	644	398999	665167	432057	689144	0.626947	-0.673585	-0.865585
						-59	3.3375	JL102921_110821_RPB4_C1.22076.22076.5	NP	10.471	0.262952	0.0853	//14	25//216	8.80875	1.24074	K.IDPDTK[2166.21]APNAVVITFEKEDHTLGNLIR.A	YOL005C	1	RPB11	IDPDTKAPNAVVITFEKEDHTLGNLIR	26	//18	13//115	1.66225	1	R.EKGPQVCAK[3412.84]LFGNIQK.V	YDL140C	1	RPB1	EKGPQVCAKLFGNIQK	644	487787	662210	530036	675899	0.784195	-0.350716	-0.542716
						-59	8.06222	JL102921_110821_RPB4_C1_30B.22518.22518.6	P	10.3823	0.25568	0.141	2//12	32//233	8.374	1.32759	K.LKIDPDTK[1909.07]APNAVVITFEKEDHTLGNLIR.A	YOL005C	1	RPB11	LKIDPDTKAPNAVVITFEKEDHTLGNLIR	26	1//16	9//93	2.00825	0.892857	K.GPQVCAK[3654.02]LFGNIQK.V	YDL140C	1	RPB1	GPQVCAKLFGNIQK	644	497142	810280	538557	838241	0.642485	-0.638266	-0.830266
						-3	6.5062	JL102921_110821_RPB4_C1.22082.22082.6	N	9.803	0.290808		//14	24//158	8.5595	1.13462	K.IDPDTK[2223.26]APNAVVITFEKEDHTLGNLIR.A	YOL005C	1	RPB11	IDPDTKAPNAVVITFEKEDHTLGNLIR	26	//18	8//90	1.2435	0.566667	R.EKGPQVC[160.03]AK[3412.88]LFGNIQK.V	YDL140C	1	RPB1	EKGPQVCAKLFGNIQK	644	306942	461356	332985	474592	0.701625	-0.511228	-0.703228
						-59	5.49946	JL102921_110821_RPB4_C1_D.25509.25509.7	P	7.43325	0.228564	0.503	//12	25//233	6.36425	1.01724	K.LKIDPDTK[2166.21]APNAVVITFEKEDHTLGNLIR.A	YOL005C	1	RPB11	LKIDPDTKAPNAVVITFEKEDHTLGNLIR	26	//18	11//115	1.069	0.625	R.EKGPQVCAK[3654.02]LFGNIQK.V	YDL140C	1	RPB1	EKGPQVCAKLFGNIQK	644	330518	634754	356885	663283	0.538058	-0.894166	-1.08617
						-58	0.780935	JL102921_110821_RPB4_C1_30B.21822.21822.5	P	6.4535	0.173402	0.567	//12	21//233	5.6335	0.827586	K.LKIDPDTK[2166.21]APNAVVITFEKEDHTLGNLIR.A	YOL005C	1	RPB11	LKIDPDTKAPNAVVITFEKEDHTLGNLIR	26	2//18	10//115	0.82	0.4375	R.EKGPQVCAK[3654.02]LFGNIQK.V	YDL140C	1	RPB1	EKGPQVCAKLFGNIQK	644	66791.6	131934	72075.2	138078	0.521989	-0.93791	-1.12991
						-61	10.3937	JL102921_110821_RPB4_C1_D.25587.25587.8	P	5.40425	0.164925	0.206	1//12	23//233	4.60225	1.01724	K.LKIDPDTK[2166.21]APNAVVITFEKEDHTLGNLIR.A	YOL005C	1	RPB11	LKIDPDTKAPNAVVITFEKEDHTLGNLIR	26	//18	8//115	0.802	0.4375	R.EKGPQVCAK[3654.02]LFGNIQK.V	YDL140C	1	RPB1	EKGPQVCAKLFGNIQK	644	175669	254116	190695	260664	0.731573	-0.450926	-0.642926
	7	RPB11:26---RPB1:941	13.269	0.131147	-0.131147
						-1	4.79342	JL102921_110821_RPB4_C1_30B.20941.20941.5	P	13.269	0.331038	0.012	//14	40//222	12.9915	1.88889	K.IDPDTK[969.62]APNAVVITFEKEDHTLGNLIR.A	YOL005C	1	RPB11	IDPDTKAPNAVVITFEKEDHTLGNLIR	26	//5	3//23	0.2775	0.625	R.K[3412.84]FLR.E	YDL140C	2	RPB1	KFLR	941	412411	426492	449753	424263	1.06008	0.0841762	-0.107824
						0	4.85688	JL102921_110821_RPB4_C1_100B.24405.24405.5	P	13.2033	0.359766	0.237	//14	37//222	12.8863	1.75926	K.IDPDTK[969.62]APNAVVITFEKEDHTLGNLIR.A	YOL005C	1	RPB11	IDPDTKAPNAVVITFEKEDHTLGNLIR	26	//5	2//23	0.317	0.5	R.K[3412.84]FLR.E	YDL140C	2	RPB1	KFLR	941	234978	203178	256739	197786	1.29806	0.376359	0.184359
						0	-1.66106	JL102921_110821_RPB4_C1_D.24223.24223.6	P	12.0988	0.369484	0.688	//12	42//236	11.8547	1.84483	K.LKIDPDTK[969.62]APNAVVITFEKEDHTLGNLIR.A	YOL005C	1	RPB11	LKIDPDTKAPNAVVITFEKEDHTLGNLIR	26	//5	2//23	0.244	0.5	R.K[3654.02]FLR.E	YDL140C	2	RPB1	KFLR	941	367847	583672	398683	602718	0.661475	-0.596242	-0.788242
						0	4.75823	JL102921_110821_RPB4_C1_100B.24412.24412.6	P	9.8995	0.271386	0.308	//14	28//222	9.836	1.22222	K.IDPDTK[969.62]APNAVVITFEKEDHTLGNLIR.A	YOL005C	1	RPB11	IDPDTKAPNAVVITFEKEDHTLGNLIR	26	//5	1//23	0.0635	0.125	R.K[3412.84]FLR.E	YDL140C	2	RPB1	KFLR	941	352888	257374	386149	244335	1.58041	0.660296	0.468296
	8	RPB11:26---RPB1:637	7.33325	-0.527051	0.527051
						2613	-77.6666	JL102921_110821_RPB4_C1_100B.24730.24730.3	P	7.33325	0.204642	0.658	1//12	24//105	6.79025	1.08621	K.LKIDPDTK[2166.21]APNAVVITFEKEDHTLGNLIR.A	YOL005C	1	RPB11	LKIDPDTKAPNAVVITFEKEDHTLGNLIR	26	//16	5//63	0.543	0.3125	R.EK[3654.02]GPQVCAKLFGNIQK.V	YDL140C	1	RPB1	EKGPQVCAKLFGNIQK	637	404646	614367	438904	632452	0.693972	-0.527051	-0.719051
	9	RPB11:37---RPB1:129	5.0095	-1.56418	1.56418
						-1	15.7366	JL102921_110821_RPB4_C1_30B.22333.22333.6	P	5.0095	0.147516	0.707	1//17	27//160	4.981	1.57143	K.APNAVVITFEK[1362.8]EDHTLGNLIR.A	YOL005C	1	RPB11	APNAVVITFEKEDHTLGNLIR	37	//12	1//51	0.0285	0.0555556	R.Q[111.03]ALAIK[2743.51]DSK.K	YDL140C	1	RPB1	QALAIKDSK	129	298114	882871	318122	940719	0.338169	-1.56418	-1.75618
	10	RPB11:37---RPB1:186	5.9075	-0.74544	0.74544
						1	-0.681525	JL102921_110821_RPB4_C1.26199.26199.5	P	5.9075	0.171967	0.109	//17	23//160	5.17275	1.35714	K.APNAVVITFEK[1223.75]EDHTLGNLIR.A	YOL005C	1	RPB11	APNAVVITFEKEDHTLGNLIR	37	1//9	6//34	0.73475	0.785714	K.LVGSWK[2743.51]K.D	YDL140C	1	RPB1	LVGSWKK	186	33356.9	57503.1	36097.5	59703.7	0.604612	-0.725919	-0.917919
						0	1.17723	JL102921_110821_RPB4_C1_50B.28548.28548.5	N	5.90075	0.163501		1//17	25//160	4.8395	1.525	K.APNAVVITFEK[1223.74]EDHTLGNLIR.A	YOL005C	1	RPB11	APNAVVITFEKEDHTLGNLIR	37	1//9	6//34	1.06125	1.16667	K.LVGSWK[2743.51]K.D	YDL140C	1	RPB1	LVGSWKK	186	46624.7	81631.3	50440.2	84837.1	0.594554	-0.75012	-0.94212
						1	-5.83907	JL102921_110821_RPB4_C1.26204.26204.5	P	5.79275	0.166389	0.151	//17	23//160	5.05625	1.33333	K.APNAVVITFEK[1223.75]EDHTLGNLIR.A	YOL005C	1	RPB11	APNAVVITFEKEDHTLGNLIR	37	//9	5//34	0.7365	0.714286	K.LVGSWK[2743.51]K.D	YDL140C	1	RPB1	LVGSWKK	186	36201.3	57042.6	39240.9	58875.8	0.666504	-0.585315	-0.777315
						0	0.601236	JL102921_110821_RPB4_C1_50B.28902.28902.5	N	5.7785	0.157581		//17	16//160	4.72225	1.075	K.APNAVVITFEK[1223.75]EDHTLGNLIR.A	YOL005C	1	RPB11	APNAVVITFEKEDHTLGNLIR	37	//9	6//34	1.05625	1.16667	K.LVGSWK[2743.51]K.D	YDL140C	1	RPB1	LVGSWKK	186	34243.6	67975.7	36948.4	71160.3	0.519229	-0.945558	-1.13756
						-1	0.3322	JL102921_110821_RPB4_C1_30B.26706.26706.5	P	5.641	0.150298	0.0583	//17	16//160	4.622	0.97619	K.APNAVVITFEK[1223.75]EDHTLGNLIR.A	YOL005C	1	RPB11	APNAVVITFEKEDHTLGNLIR	37	//9	6//34	1.019	1	K.LVGSWK[2743.51]K.D	YDL140C	1	RPB1	LVGSWKK	186	48160.9	84522.1	52099.7	87854.4	0.593023	-0.753839	-0.945839
						0	-1.46405	JL102921_110821_RPB4_C1.26655.26655.5	P	4.83075	0.140842	0.704	//17	13//160	3.924	0.761905	K.APNAVVITFEK[1223.75]EDHTLGNLIR.A	YOL005C	1	RPB11	APNAVVITFEKEDHTLGNLIR	37	//9	6//34	0.90675	1	K.LVGSWK[2743.51]K.D	YDL140C	1	RPB1	LVGSWKK	186	56420.5	96392.1	61066.7	100024	0.61052	-0.711889	-0.903889
3	RPB1---RPB2
	1	RPB1:343---RPB2:886	8.1635	0.124697	-0.124697
						0	4.00974	JL102921_110821_RPB4_C1_30B.08950.08950.5	P	8.1635	0.291762	0.263	//18	26//166	8.011	1.775	R.M[147.04]K[1197.67]HGTYDKLDDDGLIAPGVR.V	YOR151C	1	RPB2	MKHGTYDKLDDDGLIAPGVR	886	//9	4//34	0.1525	0.428571	R.GNLM[147.04]GK[2623.35]R.V	YDL140C	1	RPB1	GNLMGKR	343	764512	771073	833974	764918	1.09028	0.124697	-0.0673032
	2	RPB1:343---RPB2:987	5.7045	1.03286	-1.03286
						-1	0.222347	JL102921_110821_RPB4_C1_30B.07154.07154.5	N	5.7045	0.219607		//14	12//75	4.477	1.54545	R.HGQK[1197.67]GTIGITYR.R	YOR151C	1	RPB2	HGQKGTIGITYR	987	//9	6//36	1.2275	1.08333	R.GNLM[147.04]GK[1736.98]R.V	YDL140C	1	RPB1	GNLMGKR	343	368087	216176	403416	197165	2.04608	1.03286	0.840861
	3	RPB1:343---RPB2:1102	3.27825	0.433017	-0.433017
						0	3.73649	JL102921_110821_RPB4_C1_D.09771.09771.6	P	3.27825	0.156148	0.0808	//12	9//59	1.96525	0.95	R.HM[147.04]VDDK[1450.86]IHAR.A	YOR151C	1	RPB2	HMVDDKIHAR	1102	//11	7//48	1.313	1	R.IRGNLMGK[1643.86]R.V	YDL140C	1	RPB1	IRGNLMGKR	343	235186	210463	256879	205802	1.24818	0.31983	0.12783
						-428	35.4394	JL102921_110821_RPB4_C1_100B.08138.08138.7	P	3.05275	0.128596	0.205	//12	12//59	2.076	1.65	R.HM[147.04]VDDK[1466.86]IHAR.A	YOR151C	1	RPB2	HMVDDKIHAR	1102	//11	5//48	0.97675	0.722222	R.IRGNLM[147.04]GK[1643.86]R.V	YDL140C	1	RPB1	IRGNLMGKR	343	270586	165208	296481	151884	1.95202	0.964967	0.772967
						0	0.475789	JL102921_110821_RPB4_C1_D.04863.04863.6	P	2.665	0.119924	0.0904	//12	7//59	1.69	0.85	R.HM[147.04]VDDK[1466.86]IHAR.A	YOR151C	1	RPB2	HMVDDKIHAR	1102	//11	5//48	0.975	0.722222	R.IRGNLM[147.04]GK[1643.86]R.V	YDL140C	1	RPB1	IRGNLMGKR	343	1.53764e+06	1.66056e+06	1.67601e+06	1.65953e+06	1.00993	0.0142544	-0.177746
	4	RPB1:941---RPB2:987	5.444	0.871042	-0.871042
						0	4.9721	JL102921_110821_RPB4_C1_70B.09144.09144.5	N	5.444	0.198603		//14	17//79	4.512	2	R.HGQK[969.63]GTIGITYR.R	YOR151C	1	RPB2	HGQKGTIGITYR	987	//5	4//26	0.932	1.125	R.K[1736.99]FLR.E	YDL140C	2	RPB1	KFLR	941	531426	382989	581570	362877	1.60266	0.680472	0.488472
						0	4.11499	JL102921_110821_RPB4_C1_100B.11663.11663.5	P	5.42175	0.217457	0.373	//14	17//79	4.55875	1.95833	R.HGQK[969.62]GTIGITYR.R	YOR151C	1	RPB2	HGQKGTIGITYR	987	//5	3//26	0.863	1	R.K[1736.98]FLR.E	YDL140C	2	RPB1	KFLR	941	854806	493880	936949	448889	2.08726	1.06161	0.869612
	5	RPB1:941---RPB2:1102	3.58525	1.57216	-1.57216
						0	2.5217	JL102921_110821_RPB4_C1_100B.09287.09287.5	P	3.58525	0.113314	0.0148	//12	15//66	3.093	1.9	R.HM[147.04]VDDK[969.62]IHAR.A	YOR151C	1	RPB2	HMVDDKIHAR	1102	//5	3//26	0.49225	0.625	R.K[1643.86]FLR.E	YDL140C	2	RPB1	KFLR	941	1.04514e+06	456161	1.14737e+06	385868	2.97349	1.57216	1.38016
	6	RPB1:34---RPB2:1183	7.53075	0.0611305	-0.0611305
						-3	0.340775	JL102921_110821_RPB4_C1_100B.20237.20237.7	N	7.53075	0.217404		//9	16//158	4.8005	0.884615	K.LNHNQFEC[160.03]K[2615.38]GC[160.03]DNKIDIYQIHIPYAAK.L	YOR151C	1	RPB2	LNHNQFECKGCDNKIDIYQIHIPYAAK	1183	//17	9//110	2.73025	0.694444	R.AISVAK[3695.84]IRFPETM[147.04]DETQTR.A	YDL140C	1	RPB1	AISVAKIRFPETMDETQTR	34	674886	674161	736284	668053	1.10214	0.140301	-0.0516988
						-3	1.35966	JL102921_110821_RPB4_C1_70B.17984.17984.7	N	6.55475	0.179656		//9	15//158	4.28325	0.807692	K.LNHNQFEC[160.03]K[2615.39]GC[160.03]DNKIDIYQIHIPYAAK.L	YOR151C	1	RPB2	LNHNQFECKGCDNKIDIYQIHIPYAAK	1183	//17	9//110	2.2715	0.638889	R.AISVAK[3695.85]IRFPETM[147.04]DETQTR.A	YDL140C	1	RPB1	AISVAKIRFPETMDETQTR	34	564827	622348	615506	623251	0.987573	-0.0180401	-0.21004
	7	RPB1:797---RPB2:987	7.3055	0.309013	-0.309013
						-1	1.78495	JL102921_110821_RPB4_C1_100B.16970.16970.5	N	7.3055	0.20677		//13	20//193	5.4485	0.934783	R.TLPHFSKDDYSPESK[1736.97]GFVENSYLR.G	YDL140C	1	RPB1	TLPHFSKDDYSPESKGFVENSYLR	797	//14	7//69	1.857	0.909091	R.HGQK[3222.6]GTIGITYR.R	YOR151C	1	RPB2	HGQKGTIGITYR	987	545756	480692	596190	469080	1.27098	0.345938	0.153938
						-1	3.93893	JL102921_110821_RPB4_C1_70B.14837.14837.5	N	6.79925	0.161278		//13	23//193	4.626	0.956522	R.TLPHFSKDDYSPESK[1736.99]GFVENSYLR.G	YDL140C	1	RPB1	TLPHFSKDDYSPESKGFVENSYLR	797	1//14	11//69	2.17325	1.36364	R.HGQK[3222.62]GTIGITYR.R	YOR151C	1	RPB2	HGQKGTIGITYR	987	369924	340819	403927	334500	1.20755	0.272087	0.0800867
	8	RPB1:797---RPB2:1102	8.58775	0.78384	-0.78384
						0	2.47116	JL102921_110821_RPB4_C1_100B.15397.15397.4	N	8.58775	0.235849		//13	25//142	7.28825	1.43478	R.TLPHFSKDDYSPESK[1643.88]GFVENSYLR.G	YDL140C	1	RPB1	TLPHFSKDDYSPESKGFVENSYLR	797	//12	7//47	1.2995	0.944444	R.HM[147.04]VDDK[3222.62]IHAR.A	YOR151C	1	RPB2	HMVDDKIHAR	1102	205217	138367	224697	129614	1.73358	0.793756	0.601756
						-2	1.04237	JL102921_110821_RPB4_C1_100B.16701.16701.7	N	7.21675	0.245343		//9	16//141	6.15125	1	R.TLPHFSK[425.27]DDYSPESK[1643.86]GFVENSYLR.G	YDL140C	1	RPB1	TLPHFSKDDYSPESKGFVENSYLR	797	2//12	7//47	1.0655	0.944444	R.HM[147.04]VDDK[3519.78]IHAR.A	YOR151C	1	RPB2	HMVDDKIHAR	1102	1.29489e+06	829459	1.41833e+06	769719	1.84266	0.881791	0.689791
						-1	7.44088	JL102921_110821_RPB4_C1_100B.15372.15372.4	N	6.876	0.214463		1//13	21//142	5.5225	1.02174	R.TLPHFSKDDYSPESK[1643.9]GFVENSYLR.G	YDL140C	1	RPB1	TLPHFSKDDYSPESKGFVENSYLR	797	//12	9//47	1.3535	1.16667	R.HM[147.04]VDDK[3222.64]IHAR.A	YOR151C	1	RPB2	HMVDDKIHAR	1102	138095	106213	151044	101679	1.4855	0.570948	0.378948
						0	1.68886	JL102921_110821_RPB4_C1_100B.15379.15379.5	P	4.62	0.10455	0.181	//13	22//193	3.77125	0.791667	R.TLPHFSKDDYSPESK[1643.86]GFVENSYLR.G	YDL140C	1	RPB1	TLPHFSKDDYSPESKGFVENSYLR	797	//12	8//58	0.84875	0.9	R.HM[147.04]VDDK[3222.61]IHAR.A	YOR151C	1	RPB2	HMVDDKIHAR	1102	1.06127e+06	718039	1.16198e+06	673033	1.72648	0.787836	0.595836
						-1	3.856	JL102921_110821_RPB4_C1_100B.15362.15362.6	P	3.7905	0.109032	0.545	//13	15//193	3.00625	0.645833	R.TLPHFSKDDYSPESK[1643.86]GFVENSYLR.G	YDL140C	1	RPB1	TLPHFSKDDYSPESKGFVENSYLR	797	1//12	9//58	0.78425	0.9	R.HM[147.04]VDDK[3222.61]IHAR.A	YOR151C	1	RPB2	HMVDDKIHAR	1102	1.06708e+06	682315	1.16882e+06	632959	1.8466	0.884868	0.692868
	9	RPB1:1350---RPB2:1102	14.5732	0.378117	-0.378117
						-1	5.36014	JL102921_110821_RPB4_C1_D.22926.22926.4	P	14.5732	0.430042	0.552	//17	37//125	13.7777	2.80952	R.AALYK[1643.86]EVYNVIASDGSYVNYR.H	YDL140C	1	RPB1	AALYKEVYNVIASDGSYVNYR	1350	1//12	8//47	0.7955	0.65	R.HM[147.04]VDDK[2801.45]IHAR.A	YOR151C	1	RPB2	HMVDDKIHAR	1102	500901	366632	548096	348259	1.57382	0.654268	0.462268
						-2	1.46412	JL102921_110821_RPB4_C1.19161.19161.4	N	12.4253	0.341376		//17	28//125	11.107	2.025	R.AALYK[1627.86]EVYNVIASDGSYVNYR.H	YDL140C	1	RPB1	AALYKEVYNVIASDGSYVNYR	1350	//12	8//46	1.31825	1	R.HMVDDK[2801.44]IHAR.A	YOR151C	1	RPB2	HMVDDKIHAR	1102	499307	404772	545874	390526	1.39779	0.48315	0.29115
						0	-2.47958	JL102921_110821_RPB4_C1_D.22910.22910.5	P	8.35275	0.280035	0.0863	//17	26//166	8.05325	1.71429	R.AALYK[1643.86]EVYNVIASDGSYVNYR.H	YDL140C	1	RPB1	AALYKEVYNVIASDGSYVNYR	1350	//12	4//58	0.2995	0.2	R.HM[147.04]VDDK[2801.45]IHAR.A	YOR151C	1	RPB2	HMVDDKIHAR	1102	888226	969610	968032	970091	0.997877	-0.00306601	-0.195066
	10	RPB1:1350---RPB2:987	14.0668	0.624442	-0.624442
						-1	-1.82355	JL102921_110821_RPB4_C1_D.24589.24589.4	NP	14.0668	0.467466	0.243	//17	31//125	13.0328	2.19048	R.AALYK[1736.98]EVYNVIASDGSYVNYR.H	YDL140C	1	RPB1	AALYKEVYNVIASDGSYVNYR	1350	//14	8//56	1.034	0.833333	R.HGQK[2801.45]GTIGITYR.R	YOR151C	1	RPB2	HGQKGTIGITYR	987	604326	369841	662147	340174	1.94649	0.960878	0.768878
						-1	0.737964	JL102921_110821_RPB4_C1.20341.20341.4	P	10.9603	0.304232	0.665	//17	28//125	10.246	1.80952	R.AALYK[1736.98]EVYNVIASDGSYVNYR.H	YDL140C	1	RPB1	AALYKEVYNVIASDGSYVNYR	1350	//14	8//56	0.71425	0.5	R.HGQK[2801.45]GTIGITYR.R	YOR151C	1	RPB2	HGQKGTIGITYR	987	621060	464802	679453	443079	1.53348	0.616808	0.424808
						0	5.62896	JL102921_110821_RPB4_C1_D.24544.24544.5	P	10.7487	0.325345	0.115	//17	27//166	10.1367	1.78571	R.AALYK[1736.98]EVYNVIASDGSYVNYR.H	YDL140C	1	RPB1	AALYKEVYNVIASDGSYVNYR	1350	//14	8//69	0.612	0.583333	R.HGQK[2801.45]GTIGITYR.R	YOR151C	1	RPB2	HGQKGTIGITYR	987	616141	463644	674040	442355	1.52375	0.607628	0.415628
						0	4.25673	JL102921_110821_RPB4_C1_D.24533.24533.5	NP	10.5783	0.321708	0.531	//17	25//166	9.56375	1.69048	R.AALYK[1736.98]EVYNVIASDGSYVNYR.H	YDL140C	1	RPB1	AALYKEVYNVIASDGSYVNYR	1350	1//14	9//69	1.0145	0.916667	R.HGQK[2801.45]GTIGITYR.R	YOR151C	1	RPB2	HGQKGTIGITYR	987	594711	522804	649681	510047	1.27377	0.349102	0.157102
						-1	3.81456	JL102921_110821_RPB4_C1_D.24565.24565.5	P	10.0207	0.31308	0.15	//17	24//166	9.23275	1.57143	R.AALYK[1736.98]EVYNVIASDGSYVNYR.H	YDL140C	1	RPB1	AALYKEVYNVIASDGSYVNYR	1350	//14	8//69	0.788	0.833333	R.HGQK[2801.45]GTIGITYR.R	YOR151C	1	RPB2	HGQKGTIGITYR	987	529459	369995	579558	348760	1.66177	0.732719	0.540719
						-1	1.67997	JL102921_110821_RPB4_C1.20344.20344.5	NP	8.18675	0.229774	0.655	//17	19//166	6.78975	1.21429	R.AALYK[1736.98]EVYNVIASDGSYVNYR.H	YDL140C	1	RPB1	AALYKEVYNVIASDGSYVNYR	1350	//14	9//69	1.397	1	R.HGQK[2801.45]GTIGITYR.R	YOR151C	1	RPB2	HGQKGTIGITYR	987	653910	531264	714882	512726	1.39427	0.479515	0.287515
	11	RPB1:1112---RPB2:507	16.3795	-0.92158	0.92158
						0	3.16856	JL102921_110821_RPB4_C1_70B.11823.11823.5	P	16.3795	0.474466	0.00427	//17	39//186	15.8375	2.58696	K.NM[147.04]K[1290.79]TPSLTVYLEPGHAADQEQAK.L	YDL140C	1	RPB1	NMKTPSLTVYLEPGHAADQEQAK	1112	//10	4//40	0.542	0.5	R.DGK[2950.49]LAKPR.Q	YOR151C	1	RPB2	DGKLAKPR	507	603023	1.17987e+06	650863	1.23418e+06	0.527367	-0.923122	-1.11512
						0	3.60139	JL102921_110821_RPB4_C1_50B.11835.11835.5	N	15.0358	0.436794		//17	39//186	13.5427	2.70455	K.NM[147.04]K[1290.8]TPSLTVYLEPGHAADQEQAK.L	YDL140C	1	RPB1	NMKTPSLTVYLEPGHAADQEQAK	1112	//10	5//40	1.493	1.14286	R.DGK[2950.51]LAKPR.Q	YOR151C	1	RPB2	DGKLAKPR	507	552283	1.36718e+06	592614	1.44657e+06	0.409668	-1.28747	-1.47947
						0	7.6977	JL102921_110821_RPB4_C1_100B.14256.14256.5	P	14.8577	0.427248	0.482	1//17	42//186	14.3332	2.45652	K.NM[147.04]K[1290.79]TPSLTVYLEPGHAADQEQAK.L	YDL140C	1	RPB1	NMKTPSLTVYLEPGHAADQEQAK	1112	//10	4//40	0.5245	0.5	R.DGK[2950.49]LAKPR.Q	YOR151C	1	RPB2	DGKLAKPR	507	354663	566470	384349	585218	0.656761	-0.60656	-0.79856
						0	5.17723	JL102921_110821_RPB4_C1_30B.11403.11403.5	NP	14.0348	0.391857	0.000204	//17	37//186	12.674	2.34783	K.NMK[1290.79]TPSLTVYLEPGHAADQEQAK.L	YDL140C	1	RPB1	NMKTPSLTVYLEPGHAADQEQAK	1112	//10	6//40	1.36075	1.0625	R.DGK[2934.5]LAKPR.Q	YOR151C	1	RPB2	DGKLAKPR	507	810631	1.78343e+06	872542	1.87686e+06	0.464895	-1.10502	-1.29702
						0	5.09192	JL102921_110821_RPB4_C1_70B.11806.11806.6	NP	13.9635	0.451652	0.00761	//17	37//186	12.4495	2.26087	K.NM[147.04]K[1290.79]TPSLTVYLEPGHAADQEQAK.L	YDL140C	1	RPB1	NMKTPSLTVYLEPGHAADQEQAK	1112	//10	5//40	1.514	1	R.DGK[2950.49]LAKPR.Q	YOR151C	1	RPB2	DGKLAKPR	507	810516	1.34349e+06	877763	1.3914e+06	0.630847	-0.664637	-0.856637
						-1	2.03215	JL102921_110821_RPB4_C1_70B.11799.11799.5	NP	13.5627	0.380907	0.0172	//17	36//186	12.2922	2.15217	K.NM[147.04]K[1290.79]TPSLTVYLEPGHAADQEQAK.L	YDL140C	1	RPB1	NMKTPSLTVYLEPGHAADQEQAK	1112	//10	5//40	1.2705	1	R.DGK[2950.49]LAKPR.Q	YOR151C	1	RPB2	DGKLAKPR	507	385954	774706	416336	811485	0.513054	-0.962817	-1.15482
						-2	3.64976	JL102921_110821_RPB4_C1_70B.11824.11824.4	P	12.9138	0.36344	0.443	//17	36//140	12.57	2.13043	K.NM[147.04]K[1290.79]TPSLTVYLEPGHAADQEQAK.L	YDL140C	1	RPB1	NMKTPSLTVYLEPGHAADQEQAK	1112	1//10	4//32	0.34375	0.375	R.DGK[2950.49]LAKPR.Q	YOR151C	1	RPB2	DGKLAKPR	507	107525	295860	115017	314388	0.365843	-1.4507	-1.6427
						-1	1.50218	JL102921_110821_RPB4_C1_50B.11837.11837.6	N	12.833	0.451914		//17	30//140	11.528	2.06818	K.NM[147.04]K[1290.79]TPSLTVYLEPGHAADQEQAK.L	YDL140C	1	RPB1	NMKTPSLTVYLEPGHAADQEQAK	1112	1//10	6//32	1.305	1	R.DGK[2950.5]LAKPR.Q	YOR151C	1	RPB2	DGKLAKPR	507	565090	1.35859e+06	606846	1.43566e+06	0.422696	-1.24231	-1.43431
						0	5.30961	JL102921_110821_RPB4_C1_30B.10425.10425.5	P	11.771	0.360753	0.000618	1//17	38//186	11.0825	2.13043	K.NM[147.04]K[1290.79]TPSLTVYLEPGHAADQEQAK.L	YDL140C	1	RPB1	NMKTPSLTVYLEPGHAADQEQAK	1112	//10	4//40	0.6885	0.5	R.DGK[2950.49]LAKPR.Q	YOR151C	1	RPB2	DGKLAKPR	507	701319	1.55819e+06	754696	1.6406e+06	0.460013	-1.12025	-1.31225
						0	2.92151	JL102921_110821_RPB4_C1_30B.10439.10439.5	NP	11.472	0.333595	0.000154	//17	33//186	9.9145	1.8913	K.NM[147.04]K[1290.79]TPSLTVYLEPGHAADQEQAK.L	YDL140C	1	RPB1	NMKTPSLTVYLEPGHAADQEQAK	1112	//10	5//40	1.5575	1	R.DGK[2950.49]LAKPR.Q	YOR151C	1	RPB2	DGKLAKPR	507	717925	1.90526e+06	768795	2.02171e+06	0.38027	-1.3949	-1.5869
						-2	2.72916	JL102921_110821_RPB4_C1_30B.11453.11453.5	P	11.0533	0.313492	0.00157	//17	36//186	10.5028	1.8913	K.NMK[1290.79]TPSLTVYLEPGHAADQEQAK.L	YDL140C	1	RPB1	NMKTPSLTVYLEPGHAADQEQAK	1112	//10	4//40	0.5505	0.5	R.DGK[2934.5]LAKPR.Q	YOR151C	1	RPB2	DGKLAKPR	507	748454	1.51051e+06	807270	1.58268e+06	0.510064	-0.971249	-1.16325
						0	3.30449	JL102921_110821_RPB4_C1_30B.11379.11379.6	NP	9.22425	0.331432	0.0003	//17	30//186	8.072	1.82609	K.NMK[1290.79]TPSLTVYLEPGHAADQEQAK.L	YDL140C	1	RPB1	NMKTPSLTVYLEPGHAADQEQAK	1112	//10	6//40	1.15225	1.0625	R.DGK[2934.5]LAKPR.Q	YOR151C	1	RPB2	DGKLAKPR	507	918726	1.26923e+06	998034	1.29729e+06	0.769321	-0.378343	-0.570343
						-1	1.99613	JL102921_110821_RPB4_C1_50B.11814.11814.6	N	9.03775	0.319835		//17	26//140	7.55325	1.68182	K.NM[147.04]K[1290.79]TPSLTVYLEPGHAADQEQAK.L	YDL140C	1	RPB1	NMKTPSLTVYLEPGHAADQEQAK	1112	1//10	6//32	1.4845	1.21429	R.DGK[2950.5]LAKPR.Q	YOR151C	1	RPB2	DGKLAKPR	507	528730	1.10503e+06	569819	1.15994e+06	0.491248	-1.02548	-1.21748
						0	1.92975	JL102921_110821_RPB4_C1_30B.10420.10420.6	NP	8.00675	0.286605	0.0156	//17	27//186	6.36975	1.41304	K.NM[147.04]K[1290.79]TPSLTVYLEPGHAADQEQAK.L	YDL140C	1	RPB1	NMKTPSLTVYLEPGHAADQEQAK	1112	//10	5//40	1.637	1	R.DGK[2950.49]LAKPR.Q	YOR151C	1	RPB2	DGKLAKPR	507	867475	1.65221e+06	936843	1.72566e+06	0.542889	-0.88127	-1.07327
						0	2.72029	JL102921_110821_RPB4_C1_30B.10430.10430.6	NP	7.8735	0.29613	0.0245	//17	27//186	6.184	1.52174	K.NM[147.04]K[1290.79]TPSLTVYLEPGHAADQEQAK.L	YDL140C	1	RPB1	NMKTPSLTVYLEPGHAADQEQAK	1112	//10	5//40	1.6895	1	R.DGK[2950.49]LAKPR.Q	YOR151C	1	RPB2	DGKLAKPR	507	948106	1.94957e+06	1.02217e+06	2.04473e+06	0.499905	-1.00027	-1.19227
						-1	2.85205	JL102921_110821_RPB4_C1_70B.11779.11779.6	NP	7.76125	0.253503	0.365	//17	34//186	6.60325	1.86957	K.NM[147.04]K[1290.79]TPSLTVYLEPGHAADQEQAK.L	YDL140C	1	RPB1	NMKTPSLTVYLEPGHAADQEQAK	1112	//10	5//40	1.158	1	R.DGK[2950.49]LAKPR.Q	YOR151C	1	RPB2	DGKLAKPR	507	717248	930104	779903	945719	0.824666	-0.278117	-0.470117
						-1	1.4519	JL102921_110821_RPB4_C1_30B.11373.11373.6	NP	7.03675	0.255121	0.00225	//17	28//186	5.98175	1.52174	K.NMK[1290.79]TPSLTVYLEPGHAADQEQAK.L	YDL140C	1	RPB1	NMKTPSLTVYLEPGHAADQEQAK	1112	//10	5//40	1.055	1	R.DGK[2934.5]LAKPR.Q	YOR151C	1	RPB2	DGKLAKPR	507	956916	1.24148e+06	1.0405e+06	1.26237e+06	0.82424	-0.278863	-0.470863
						0	3.106	JL102921_110821_RPB4_C1.11753.11753.6	NP	4.82425	0.166039	0.125	//17	19//186	3.23675	1	K.NMK[1290.79]TPSLTVYLEPGHAADQEQAK.L	YDL140C	1	RPB1	NMKTPSLTVYLEPGHAADQEQAK	1112	//10	6//40	1.5875	1.0625	R.DGK[2934.5]LAKPR.Q	YOR151C	1	RPB2	DGKLAKPR	507	788871	1639773	850285	1.72078e+06	0.494129	-1.01704	-1.20904
	12	RPB1:830---RPB2:1102	10.603	0.232059	-0.232059
						0	3.88857	JL102921_110821_RPB4_C1_30B.15757.15757.4	NP	10.603	0.273213	0.0511	//20	23//104	8.85875	1.86111	R.EGLIDTAVK[1627.87]TAETGYIQR.R	YDL140C	1	RPB1	EGLIDTAVKTAETGYIQR	830	//12	9//46	1.74425	1.05	R.HMVDDK[2371.28]IHAR.A	YOR151C	1	RPB2	HMVDDKIHAR	1102	464364	407587	507294	397560	1.27602	0.351649	0.159649
						-1	1.01531	JL102921_110821_RPB4_C1_50B.16296.16296.4	N	9.00325	0.2878		1//20	23//104	7.98925	1.85294	R.EGLIDTAVK[1643.86]TAETGYIQR.R	YDL140C	1	RPB1	EGLIDTAVKTAETGYIQR	830	//12	7//47	1.014	0.777778	R.HM[147.04]VDDK[2371.28]IHAR.A	YOR151C	1	RPB2	HMVDDKIHAR	1102	611889	508676	668803	492525	1.35791	0.441384	0.249384
						0	2.97228	JL102921_110821_RPB4_C1_30B.15740.15740.4	NP	8.838	0.27314	0.133	//20	20//104	7.3935	1.52778	R.EGLIDTAVK[1627.87]TAETGYIQR.R	YDL140C	1	RPB1	EGLIDTAVKTAETGYIQR	830	//12	8//46	1.4445	0.9	R.HMVDDK[2371.28]IHAR.A	YOR151C	1	RPB2	HMVDDKIHAR	1102	512501	427278	560156	413877	1.35343	0.436625	0.244625
						-1	1.01531	JL102921_110821_RPB4_C1_50B.16292.16292.4	N	8.719	0.257623		1//20	23//104	7.54575	1.70588	R.EGLIDTAVK[1643.86]TAETGYIQR.R	YDL140C	1	RPB1	EGLIDTAVKTAETGYIQR	830	//12	8//47	1.17325	0.888889	R.HM[147.04]VDDK[2371.28]IHAR.A	YOR151C	1	RPB2	HMVDDKIHAR	1102	529223	445870	578375	432514	1.33724	0.41926	0.22726
						0	4.4431	JL102921_110821_RPB4_C1_30B.14875.14875.4	N	8.19525	0.273974		1//20	22//104	6.8835	1.52941	R.EGLIDTAVK[1643.88]TAETGYIQR.R	YDL140C	1	RPB1	EGLIDTAVKTAETGYIQR	830	//12	8//47	1.31175	1	R.HM[147.04]VDDK[2371.3]IHAR.A	YOR151C	1	RPB2	HMVDDKIHAR	1102	524517	514384	572351	508646	1.12524	0.170237	-0.0217634
						0	4.4431	JL102921_110821_RPB4_C1_30B.14879.14879.4	N	7.92025	0.241151		1//20	22//104	6.8055	1.52941	R.EGLIDTAVK[1643.88]TAETGYIQR.R	YDL140C	1	RPB1	EGLIDTAVKTAETGYIQR	830	//12	8//47	1.11475	0.888889	R.HM[147.04]VDDK[2371.3]IHAR.A	YOR151C	1	RPB2	HMVDDKIHAR	1102	529981	527621	578218	522639	1.10634	0.145799	-0.0462014
						0	2.89156	JL102921_110821_RPB4_C1_30B.14880.14880.5	P	7.565	0.223628	0.183	//20	18//136	6.777	1.41667	R.EGLIDTAVK[1643.86]TAETGYIQR.R	YDL140C	1	RPB1	EGLIDTAVKTAETGYIQR	830	//12	5//58	0.788	0.5	R.HM[147.04]VDDK[2371.28]IHAR.A	YOR151C	1	RPB2	HMVDDKIHAR	1102	1398141	1.40418e+06	1.52525e+06	1.39231e+06	1.09548	0.131559	-0.0604411
						0	2.89156	JL102921_110821_RPB4_C1_30B.14870.14870.5	P	7.1965	0.236517	0.0316	//20	22//136	6.72225	1.77778	R.EGLIDTAVK[1643.86]TAETGYIQR.R	YDL140C	1	RPB1	EGLIDTAVKTAETGYIQR	830	//12	5//58	0.47425	0.35	R.HM[147.04]VDDK[2371.28]IHAR.A	YOR151C	1	RPB2	HMVDDKIHAR	1102	1.19414e+06	1.27148e+06	1.30182e+06	1.26881e+06	1.02602	0.0370612	-0.154939
						-2	2.75124	JL102921_110821_RPB4_C1_30B.14856.14856.5	P	6.94075	0.210272	0.226	//20	19//136	6.188	1.44444	R.EGLIDTAVK[1643.86]TAETGYIQR.R	YDL140C	1	RPB1	EGLIDTAVKTAETGYIQR	830	//12	6//58	0.75275	0.55	R.HM[147.04]VDDK[2371.28]IHAR.A	YOR151C	1	RPB2	HMVDDKIHAR	1102	1128264	1.26424e+06	1.22924e+06	1.26822e+06	0.969262	-0.0450416	-0.237042
	13	RPB1:332---RPB2:987	6.826	0.349462	-0.349462
						0	0.761498	JL102921_110821_RPB4_C1_70B.06510.06510.5	N	6.826	0.24539		//14	18//75	4.369	2.18182	R.HGQK[1193.73]GTIGITYR.R	YOR151C	1	RPB2	HGQKGTIGITYR	987	//9	8//34	2.457	1.5	R.LKGK[1736.98]EGR.I	YDL140C	1	RPB1	LKGKEGR	332	808985	708521	883793	690893	1.2792	0.355247	0.163247
						0	1.78657	JL102921_110821_RPB4_C1_100B.08776.08776.5	N	6.7925	0.271591		//14	18//75	4.34325	2.18182	R.HGQK[1193.73]GTIGITYR.R	YOR151C	1	RPB2	HGQKGTIGITYR	987	//9	9//34	2.44925	1.58333	R.LKGK[1736.97]EGR.I	YDL140C	1	RPB1	LKGKEGR	332	400472	353772	437467	345359	1.2667	0.341078	0.149078
						0	2.44042	JL102921_110821_RPB4_C1_30B.06319.06319.4	P	6.3245	0.261938	0.247	//14	17//66	5.876	2.16667	R.HGQK[952.55]GTIGITYR.R	YOR151C	1	RPB2	HGQKGTIGITYR	987	1//5	4//22	0.4485	0.6	K.GK[1736.98]EGR.I	YDL140C	1	RPB1	GKEGR	332	163654	143608	178784	140071	1.27638	0.352059	0.160059
	14	RPB1:332---RPB2:606	5.787	0.198145	-0.198145
						0	1.45082	JL102921_110821_RPB4_C1_70B.06863.06863.5	N	5.787	0.203635		//13	17//90	4.1075	1.75	R.RK[1193.74]GDINPEVSM[147.04]IR.D	YOR151C	1	RPB2	RKGDINPEVSMIR	606	//9	7//34	1.6795	1.16667	R.LKGK[1937.06]EGR.I	YDL140C	1	RPB1	LKGKEGR	332	709528	684304	774375	675351	1.14663	0.197394	0.00539435
						0	0.157422	JL102921_110821_RPB4_C1_50B.06461.06461.5	N	4.669	0.156316		//13	17//90	2.9115	1.45833	R.RK[1193.73]GDINPEVSM[147.04]IR.D	YOR151C	1	RPB2	RKGDINPEVSMIR	606	//9	7//34	1.7575	1.16667	R.LKGK[1937.06]EGR.I	YDL140C	1	RPB1	LKGKEGR	332	735960	709142	803230	699788	1.14782	0.198895	0.00689518
	15	RPB1:332---RPB2:507	2.46775	-2.24782	2.24782
						0	4.98937	JL102921_110821_RPB4_C1_50B.04698.04698.4	N	2.46775	0.21207		//10	6//38	1.45775	1.21429	R.DGK[1193.74]LAKPR.Q	YOR151C	1	RPB2	DGKLAKPR	507	//9	4//32	1.01	0.666667	R.LKGK[1290.8]EGR.I	YDL140C	1	RPB1	LKGKEGR	332	7525.09	34681.6	7879.47	37424.6	0.210542	-2.24782	-2.43982
	16	RPB1:332---RPB2:813	4.6075	0.293626	-0.293626
						0	1.21827	JL102921_110821_RPB4_C1_100B.10397.10397.4	N	4.6075	0.17398		//10	11//41	3.221	1.85714	R.AM[147.04]EYLK[1193.73]FR.E	YOR151C	1	RPB2	AMEYLKFR	813	//9	6//32	1.3865	1.08333	R.LKGK[1479.8]EGR.I	YDL140C	1	RPB1	LKGKEGR	332	618113	562041	675019	550713	1.22572	0.293626	0.101626
	17	RPB1:332---RPB2:886	15.378	-0.234621	0.234621
						-1	5.39539	JL102921_110821_RPB4_C1_30B.09175.09175.4	P	15.378	0.494947	0.506	//18	39//124	15.008	2.95	R.MK[952.55]HGTYDKLDDDGLIAPGVR.V	YOR151C	1	RPB2	MKHGTYDKLDDDGLIAPGVR	886	2//5	5//19	0.37	0.9	K.GK[2607.36]EGR.I	YDL140C	1	RPB1	GKEGR	332	1.37439e+06	980210	1.5042e+06	927132	1.62243	0.698153	0.506153
						0	2.93077	JL102921_110821_RPB4_C1_70B.08672.08672.4	P	14.4113	0.464594	0.561	//18	34//127	13.8428	2.825	R.M[147.04]K[1193.73]HGTYDKLDDDGLIAPGVR.V	YOR151C	1	RPB2	MKHGTYDKLDDDGLIAPGVR	886	//9	3//27	0.5685	0.357143	R.LKGK[2623.35]EGR.I	YDL140C	1	RPB1	LKGKEGR	332	351917	800908	378470	844225	0.448305	-1.15745	-1.34945
						0	4.48899	JL102921_110821_RPB4_C1_100B.11136.11136.5	P	10.6148	0.408016	0.64	//18	30//166	10.5335	2.45	R.M[147.04]K[1193.73]HGTYDKLDDDGLIAPGVR.V	YOR151C	1	RPB2	MKHGTYDKLDDDGLIAPGVR	886	//9	2//34	0.08125	0.142857	R.LKGK[2623.35]EGR.I	YDL140C	1	RPB1	LKGKEGR	332	354942	450654	386065	457386	0.844069	-0.244567	-0.436567
	18	RPB1:1286---RPB2:987	6.3245	0.180464	-0.180464
						0	0.73911	JL102921_110821_RPB4_C1_100B.10211.10211.5	N	6.3245	0.237055		//14	12//72	3.9615	1.68182	R.HGQK[1479.77]GTIGITYR.R	YOR151C	1	RPB2	HGQKGTIGITYR	987	//10	9//43	2.363	1.71429	R.VVM[147.04]M[147.04]K[1736.98]YDR.K	YDL140C	1	RPB1	VVMMKYDR	1286	416063	326938	454993	313995	1.44904	0.5351	0.3431
						-1	2.48593	JL102921_110821_RPB4_C1_50B.07292.07292.5	N	6.2675	0.176088		//14	11//72	3.8715	1.5	R.HGQK[1479.77]GTIGITYR.R	YOR151C	1	RPB2	HGQKGTIGITYR	987	//10	9//43	2.396	1.71429	R.VVM[147.04]M[147.04]K[1736.98]YDR.K	YDL140C	1	RPB1	VVMMKYDR	1286	1.62709e+06	1.31092e+06	1.77894e+06	1.26365e+06	1.40778	0.493417	0.301417
						-1	2.48593	JL102921_110821_RPB4_C1_50B.07296.07296.5	N	6.24775	0.190376		1//14	13//72	3.86375	1.72727	R.HGQK[1479.77]GTIGITYR.R	YOR151C	1	RPB2	HGQKGTIGITYR	987	//10	9//43	2.384	1.71429	R.VVM[147.04]M[147.04]K[1736.98]YDR.K	YDL140C	1	RPB1	VVMMKYDR	1286	1.64761e+06	1.27607e+06	1.802e+06	1.22289e+06	1.47355	0.5593	0.3673
						0	4.26729	JL102921_110821_RPB4_C1_70B.07696.07696.5	N	4.4665	0.196196		//14	10//72	2.8765	1.31818	R.HGQK[1479.78]GTIGITYR.R	YOR151C	1	RPB2	HGQKGTIGITYR	987	//10	7//43	1.59	1.14286	R.VVM[147.04]M[147.04]K[1736.99]YDR.K	YDL140C	1	RPB1	VVMMKYDR	1286	926248	1.2019e+06	1.00715e+06	1.22214e+06	0.824086	-0.279134	-0.471134
						0	4.26729	JL102921_110821_RPB4_C1_70B.07689.07689.5	N	4.3655	0.178523		//14	10//72	2.8535	1.31818	R.HGQK[1479.78]GTIGITYR.R	YOR151C	1	RPB2	HGQKGTIGITYR	987	//10	7//43	1.512	1.14286	R.VVM[147.04]M[147.04]K[1736.99]YDR.K	YDL140C	1	RPB1	VVMMKYDR	1286	679866	956062	738350	978567	0.754522	-0.406365	-0.598365
	19	RPB1:1093---RPB2:987	7.083	-0.154812	0.154812
						0	6.85827	JL102921_110821_RPB4_C1_30B.07412.07412.4	NP	7.083	0.246747	0.000262	//14	18//61	5.467	2.16667	R.HGQK[1249.76]GTIGITYR.R	YOR151C	1	RPB2	HGQKGTIGITYR	987	//9	8//38	1.616	1.375	K.K[1736.98]VTSGVPR.L	YDL140C	1	RPB1	KVTSGVPR	1093	243208	308772	264533	313383	0.844121	-0.244479	-0.436479
						0	1.48024	JL102921_110821_RPB4_C1_30B.07434.07434.4	NP	6.9715	0.254221	0.123	//14	18//61	5.5325	2.04167	R.HGQK[1249.76]GTIGITYR.R	YOR151C	1	RPB2	HGQKGTIGITYR	987	//9	8//38	1.439	1.375	K.K[1736.98]VTSGVPR.L	YDL140C	1	RPB1	KVTSGVPR	1093	306484	368201	333613	371848	0.897174	-0.15654	-0.34854
						0	0.000360972	JL102921_110821_RPB4_C1_50B.07159.07159.4	N	4.796	0.170174		//14	14//61	3.218	1.5	R.HGQK[1249.76]GTIGITYR.R	YOR151C	1	RPB2	HGQKGTIGITYR	987	1//9	7//38	1.578	1.125	K.K[1736.98]VTSGVPR.L	YDL140C	1	RPB1	KVTSGVPR	1093	890283	1.01359e+06	969765	1.01839e+06	0.952251	-0.0705865	-0.262587
						0	3.07373	JL102921_110821_RPB4_C1.06620.06620.4	P	2.77225	0.0972771	0.363	//14	7//61	1.0485	0.458333	R.HGQK[1249.76]GTIGITYR.R	YOR151C	1	RPB2	HGQKGTIGITYR	987	//9	5//38	1.72375	0.8125	K.K[1736.98]VTSGVPR.L	YDL140C	1	RPB1	KVTSGVPR	1093	881993	1.05371e+06	960134	1.0636e+06	0.902725	-0.147642	-0.339642
	20	RPB1:1246---RPB2:987	8.657	-1.82024	1.82024
						0	-5.43668	JL102921_110821_RPB4_C1_30B.07370.07370.5	NP	8.657	0.214372	0.0199	//17	23//129	7.66625	2.05882	R.PK[1736.98]SLDAETEAEEDHM[147.04]LK.K	YDL140C	1	RPB1	PKSLDAETEAEEDHMLK	1246	1//14	7//69	0.99075	0.583333	R.HGQK[2365.16]GTIGITYR.R	YOR151C	1	RPB2	HGQKGTIGITYR	987	73101.1	255569	77532.3	273798	0.283174	-1.82024	-2.01224
	21	RPB1:1246---RPB2:1102	5.74775	0.239041	-0.239041
						0	5.02061	JL102921_110821_RPB4_C1_70B.07982.07982.5	NP	5.74775	0.172481	0.681	//17	16//155	4.294	0.875	R.VVRPK[1643.86]SLDAETEAEEDHM[147.04]LK.K	YDL140C	1	RPB1	VVRPKSLDAETEAEEDHMLK	1246	//12	9//58	1.45375	1.05	R.HM[147.04]VDDK[2719.39]IHAR.A	YOR151C	1	RPB2	HMVDDKIHAR	1102	148898	139984	162550	137730	1.18021	0.239041	0.0470406
	22	RPB1:176---RPB2:987	5.18175	-0.143821	0.143821
						0	2.97346	JL102921_110821_RPB4_C1_30B.07301.07301.4	NP	5.18175	0.169643	0.679	//14	16//66	3.4155	1.58333	R.HGQK[966.59]GTIGITYR.R	YOR151C	1	RPB2	HGQKGTIGITYR	987	2//6	10//25	1.76625	2	R.K[1736.98]DGLK.L	YDL140C	1	RPB1	KDGLK	176	406583	484581	442619	489017	0.905118	-0.143821	-0.335821
	23	RPB1:533---RPB2:1102	3.55475	0.373865	-0.373865
						0	2.99555	JL102921_110821_RPB4_C1_100B.09391.09391.5	P	3.55475	0.121817	0.0135	//12	12//66	1.90575	1.3	R.HM[147.04]VDDK[1036.68]IHAR.A	YOR151C	1	RPB2	HMVDDKIHAR	1102	//6	6//32	1.649	1.6	R.K[1643.86]LTLR.D	YDL140C	1	RPB1	KLTLR	533	487403	389865	532924	375414	1.41956	0.505446	0.313446
						0	1.50182	JL102921_110821_RPB4_C1_70B.07075.07075.5	P	2.26	0.0766856	0.286	//12	11//66	1.3205	1.1	R.HM[147.04]VDDK[1036.68]IHAR.A	YOR151C	1	RPB2	HMVDDKIHAR	1102	//6	3//32	0.9395	0.8	R.K[1643.86]LTLR.D	YDL140C	1	RPB1	KLTLR	533	856723	803835	935295	790704	1.18286	0.242284	0.0502842
	24	RPB1:789---RPB2:1102	5.83125	0.627677	-0.627677
						-1	0.350555	JL102921_110821_RPB4_C1_50B.09620.09620.4	N	5.83125	0.163673		//17	17//83	4.479	1.57143	R.TLPHFSK[1643.87]DDYSPESK.G	YDL140C	1	RPB1	TLPHFSKDDYSPESK	789	//12	10//47	1.35225	1.16667	R.HM[147.04]VDDK[2157.08]IHAR.A	YOR151C	1	RPB2	HMVDDKIHAR	1102	370202	288889	404865	277166	1.46073	0.546692	0.354692
						-2	4.48709	JL102921_110821_RPB4_C1_100B.15396.15396.7	P	4.1585	0.125769	0.687	//12	11//192	3.28725	0.520833	R.TLPHFSK[1643.86]DDYSPESKGFVENSYLR.G	YDL140C	1	RPB1	TLPHFSKDDYSPESKGFVENSYLR	789	1//12	8//58	0.87125	0.75	R.HM[147.04]VDDK[3222.61]IHAR.A	YOR151C	1	RPB2	HMVDDKIHAR	1102	1083813	768193	1.18624e+06	725843	1.63429	0.708661	0.516661
	25	RPB1:1300---RPB2:99	2.509	0.093911	-0.093911
						-1	5.56244	JL102921_110821_RPB4_C1.25721.25721.8	P	2.509	0.0565001	0.32	//8	10//304	1.453	0.22973	R.KVPSPTGEYVK[4262.19]EPEWVLETDGVNLSEVM[147.04]TVPGIDPTR.I	YDL140C	1	RPB1	KVPSPTGEYVKEPEWVLETDGVNLSEVMTVPGIDPTR	1300	//4	9//255	1.056	0.225806	K.YEISFGK[425.27]IYVTK[4491.3]PM[147.04]VNESDGVTHALYPQEAR.L	YOR151C	1	RPB2	YEISFGKIYVTKPMVNESDGVTHALYPQEAR	99	176107	181027	192066	179962	1.06726	0.093911	-0.098089
	26	RPB1:1102---RPB2:507	9.97275	-1.47026	1.47026
						0	4.28198	JL102921_110821_RPB4_C1_D.12825.12825.4	NP	9.97275	0.42219	0.035	//9	19//43	6.76675	3.38889	R.LK[1290.79]EILNVAK.N	YDL140C	1	RPB1	LKEILNVAK	1102	//10	9//36	3.206	1.5625	R.DGK[1433.91]LAKPR.Q	YOR151C	1	RPB2	DGKLAKPR	507	327576	573661	354381	596199	0.594401	-0.750492	-0.942492
						0	3.50139	JL102921_110821_RPB4_C1_30B.09163.09163.4	NP	9.50975	0.335547	0.0543	//9	19//43	7.1545	3.38889	R.LK[1290.79]EILNVAK.N	YDL140C	1	RPB1	LKEILNVAK	1102	//10	8//36	2.35525	1.3125	R.DGK[1433.91]LAKPR.Q	YOR151C	1	RPB2	DGKLAKPR	507	897421	2.56678e+06	958759	2.7315e+06	0.351	-1.51046	-1.70246
						0	0.377993	JL102921_110821_RPB4_C1_50B.09987.09987.4	N	9.29125	0.334206		//9	17//43	6.34975	3.3125	R.LK[1290.78]EILNVAK.N	YDL140C	1	RPB1	LKEILNVAK	1102	//10	9//36	2.9415	1.71429	R.DGK[1433.9]LAKPR.Q	YOR151C	1	RPB2	DGKLAKPR	507	794129	2.04617e+06	851145	2.16863e+06	0.39248	-1.34931	-1.54131
						-1	6.62377	JL102921_110821_RPB4_C1.08958.08958.4	NP	9.21075	0.314919	0.00452	//9	16//43	6.7255	2.88889	R.LK[1290.79]EILNVAK.N	YDL140C	1	RPB1	LKEILNVAK	1102	//10	9//36	2.48525	1.1875	R.DGK[1433.91]LAKPR.Q	YOR151C	1	RPB2	DGKLAKPR	507	393744	911155	423270	961179	0.440365	-1.18323	-1.37523
						0	2.72686	JL102921_110821_RPB4_C1.08974.08974.3	NP	8.31425	0.223114	0.0466	//9	12//34	6.138	2.22222	R.LK[1290.79]EILNVAK.N	YDL140C	1	RPB1	LKEILNVAK	1102	//10	8//28	2.17625	1.3125	R.DGK[1433.91]LAKPR.Q	YOR151C	1	RPB2	DGKLAKPR	507	733814	2.33845e+06	781057	2.49794e+06	0.31268	-1.67724	-1.86924
						0	2.97957	JL102921_110821_RPB4_C1_70B.10121.10121.5	NP	7.5175	0.24793	0.713	//9	14//52	5.572	2.11111	R.LK[1290.79]EILNVAK.N	YDL140C	1	RPB1	LKEILNVAK	1102	1//10	7//44	1.9455	1.125	R.DGK[1433.91]LAKPR.Q	YOR151C	1	RPB2	DGKLAKPR	507	241638	906819	255532	973494	0.26249	-1.92967	-2.12167
						0	2.09711	JL102921_110821_RPB4_C1_50B.09998.09998.5	N	7.39425	0.253819		//9	14//52	5.33	2.5	R.LK[1290.79]EILNVAK.N	YDL140C	1	RPB1	LKEILNVAK	1102	1//10	7//44	2.06425	1.28571	R.DGK[1433.91]LAKPR.Q	YOR151C	1	RPB2	DGKLAKPR	507	440819	1482319	468256	1.58616e+06	0.295214	-1.76017	-1.95217
						0	3.46744	JL102921_110821_RPB4_C1_100B.12665.12665.5	NP	7.37375	0.249661	0.617	//9	15//52	5.81475	2.16667	R.LK[1290.79]EILNVAK.N	YDL140C	1	RPB1	LKEILNVAK	1102	//10	5//44	1.559	0.8125	R.DGK[1433.91]LAKPR.Q	YOR151C	1	RPB2	DGKLAKPR	507	148088	447293	157921	476932	0.331119	-1.59458	-1.78658
						0	0.379005	JL102921_110821_RPB4_C1_100B.12650.12650.4	NP	7.19775	0.309914	0.0948	//9	18//43	6.03225	3.16667	R.LK[1290.79]EILNVAK.N	YDL140C	1	RPB1	LKEILNVAK	1102	//10	5//36	1.1655	0.5625	R.DGK[1433.91]LAKPR.Q	YOR151C	1	RPB2	DGKLAKPR	507	461163	561562	501890	567829	0.883875	-0.178085	-0.370085
						0	-0.624618	JL102921_110821_RPB4_C1_70B.10082.10082.4	NP	7.07325	0.306832	0.144	//9	17//43	5.4845	3.11111	R.LK[1290.79]EILNVAK.N	YDL140C	1	RPB1	LKEILNVAK	1102	//10	5//36	1.58875	0.8125	R.DGK[1433.91]LAKPR.Q	YOR151C	1	RPB2	DGKLAKPR	507	358942	616932	388456	640421	0.606564	-0.721269	-0.913269
						0	2.35231	JL102921_110821_RPB4_C1_30B.09161.09161.5	NP	6.65875	0.211624	0.152	//9	15//52	4.9815	2	R.LK[1290.79]EILNVAK.N	YDL140C	1	RPB1	LKEILNVAK	1102	1//10	6//44	1.67725	0.875	R.DGK[1433.91]LAKPR.Q	YOR151C	1	RPB2	DGKLAKPR	507	345264	1.6434e+06	360890	1.77465e+06	0.203358	-2.2979	-2.4899
						0	2.21291	JL102921_110821_RPB4_C1_D.12857.12857.5	NP	6.52525	0.233629	0.0284	//9	13//52	5.045	1.88889	R.LK[1290.79]EILNVAK.N	YDL140C	1	RPB1	LKEILNVAK	1102	1//10	6//44	1.48025	0.875	R.DGK[1433.91]LAKPR.Q	YOR151C	1	RPB2	DGKLAKPR	507	156360	453298	166974	482629	0.345967	-1.53129	-1.72329
						-1	1.82356	JL102921_110821_RPB4_C1_50B.09982.09982.3	N	6.126	0.215697		//9	11//34	5.013	2.0625	R.LK[1290.79]EILNVAK.N	YDL140C	1	RPB1	LKEILNVAK	1102	//10	6//28	1.113	0.714286	R.DGK[1433.91]LAKPR.Q	YOR151C	1	RPB2	DGKLAKPR	507	650766	1.07667e+06	704784	1.11493e+06	0.632132	-0.661702	-0.853702
						-1	3.63471	JL102921_110821_RPB4_C1.09013.09013.5	NP	5.95	0.17473	0.332	//9	13//52	4.25475	1.88889	R.LK[1290.79]EILNVAK.N	YDL140C	1	RPB1	LKEILNVAK	1102	1//10	6//44	1.69525	0.875	R.DGK[1433.91]LAKPR.Q	YOR151C	1	RPB2	DGKLAKPR	507	723490	3.69145e+06	753220	3.99211e+06	0.188677	-2.40601	-2.59801
						0	2.14322	JL102921_110821_RPB4_C1.08973.08973.5	P	4.549	0.137782	0.416	1//9	14//52	3.896	1.94444	R.LK[1290.79]EILNVAK.N	YDL140C	1	RPB1	LKEILNVAK	1102	1//10	5//44	0.653	0.4375	R.DGK[1433.91]LAKPR.Q	YOR151C	1	RPB2	DGKLAKPR	507	528790	2.87018e+06	548427	3.10775e+06	0.176471	-2.5025	-2.6945
	27	RPB1:689---RPB2:813	4.78475	-0.0670422	0.0670422
						0	6.01014	JL102921_110821_RPB4_C1_50B.12458.12458.4	N	4.78475	0.163707		//10	8//41	2.3345	1.42857	R.AM[147.04]EYLK[1208.77]FR.E	YOR151C	1	RPB2	AMEYLKFR	813	1//8	9//35	2.45025	1.42857	K.K[1479.81]VLDVTK.E	YDL140C	1	RPB1	KVLDVTK	689	717264	814805	781322	818487	0.954593	-0.0670422	-0.259042
	28	RPB1:330---RPB2:1102	5.7825	-0.198015	0.198015
						0	2.21883	JL102921_110821_RPB4_C1_70B.05340.05340.3	P	5.7825	0.177552	0.297	//12	14//44	5.5665	2.2	R.HM[147.04]VDDK[851.57]IHAR.A	YOR151C	1	RPB2	HMVDDKIHAR	1102	//4	3//13	0.216	0.625	R.LK[1643.86]GK.E	YDL140C	1	RPB1	LKGK	330	399807	492977	435042	499045	0.871749	-0.198015	-0.390015
	29	RPB1:330---RPB2:987	3.7095	0.390969	-0.390969
						0	12.9332	JL102921_110821_RPB4_C1_30B.06643.06643.4	P	3.7095	0.130833	0.455	//14	17//65	3.4345	1.5	R.HGQK[851.57]GTIGITYR.R	YOR151C	1	RPB2	HGQKGTIGITYR	987	//4	3//17	0.275	0.375	R.LK[1736.98]GK.E	YDL140C	1	RPB1	LKGK	330	304246	260753	332450	253532	1.31127	0.390969	0.198969
	30	RPB1:330---RPB2:886	12.8582	-0.874051	0.874051
						0	3.55907	JL102921_110821_RPB4_C1_70B.08645.08645.5	P	12.8582	0.412719	0.325	//18	31//166	12.5962	2.525	R.M[147.04]K[1193.73]HGTYDKLDDDGLIAPGVR.V	YOR151C	1	RPB2	MKHGTYDKLDDDGLIAPGVR	886	//7	3//34	0.262	0.357143	R.LK[2623.35]GKEGR.I	YDL140C	1	RPB1	LKGKEGR	330	470447	891873	508117	931278	0.545613	-0.874051	-1.06605
	31	RPB1:728---RPB2:374	5.94125	0.60588	-0.60588
						0	6.53993	JL102921_110821_RPB4_C1_100B.16779.16779.4	P	5.94125	0.200227	0.00536	2//12	19//63	5.84825	2.40909	R.K[952.55]AFFLGYM[147.04]INR.L	YOR151C	1	RPB2	KAFFLGYMINR	374	//5	2//21	0.093	0.2	R.DK[1781.97]AGR.L	YDL140C	1	RPB1	DKAGR	728	540712	357071	592129	333233	1.77692	0.82938	0.63738
						0	1.43324	JL102921_110821_RPB4_C1_70B.14097.14097.4	P	5.6405	0.197767	0.173	//12	17//63	5.59175	2.27273	R.K[952.55]AFFLGYM[147.04]INR.L	YOR151C	1	RPB2	KAFFLGYMINR	374	//5	1//21	0.04875	0.1	R.DK[1781.97]AGR.L	YDL140C	1	RPB1	DKAGR	728	1.86005e+06	1.60247e+06	2.03238e+06	1.55918e+06	1.30349	0.38238	0.19038
	32	RPB1:728---RPB2:987	5.785	1.00806	-1.00806
						0	2.0628	JL102921_110821_RPB4_C1_70B.06227.06227.4	N	5.785	0.196215		//15	25//74	4.69525	2.66667	R.HGQK[952.56]GTIGITYRR.E	YOR151C	1	RPB2	HGQKGTIGITYRR	987	1//5	6//19	1.08975	1.625	R.DK[1893.08]AGR.L	YDL140C	1	RPB1	DKAGR	728	744448	407759	816257	366262	2.22862	1.15615	0.964148
						430	-81.3699	JL102921_110821_RPB4_C1_30B.06694.06694.4	P	2.93475	0.117529	0.214	//14	12//66	2.73975	1.16667	R.HGQK[952.55]GTIGITYR.R	YOR151C	1	RPB2	HGQKGTIGITYR	987	//5	4//22	0.195	0.6	R.DK[1736.98]AGR.L	YDL140C	1	RPB1	DKAGR	728	969878	629185	1.06224e+06	585259	1.81499	0.859964	0.667964
	33	RPB1:49---RPB2:865	6.4545	0.214561	-0.214561
						0	5.31326	JL102921_110821_RPB4_C1_50B.11242.11242.5	N	6.4545	0.218312		//16	21//120	5.52775	1.73333	K.K[1446.86]YGM[147.04]SITETFEKPQR.T	YOR151C	1	RPB2	KYGMSITETFEKPQR	865	2//10	8//52	0.92675	0.833333	R.AK[2237.18]IGGLNDPR.L	YDL140C	1	RPB1	AKIGGLNDPR	49	778165	742636	849381	732003	1.16035	0.214561	0.0225607
	34	RPB1:1205---RPB2:1102	4.86675	0.407144	-0.407144
						0	3.66788	JL102921_110821_RPB4_C1_50B.06882.06882.5	N	4.86675	0.191333		//18	13//113	3.87175	1.16667	R.AAM[147.04]NDK[1643.88]DLTM[147.04]GQVGER.I	YDL140C	1	RPB1	AAMNDKDLTMGQVGER	1205	//12	8//58	0.995	1	R.HM[147.04]VDDK[2174.07]IHAR.A	YOR151C	1	RPB2	HMVDDKIHAR	1102	582851	494663	636941	480326	1.32606	0.407144	0.215144
	35	RPB1:403---RPB2:987	7.08075	0.870336	-0.870336
						0	3.58256	JL102921_110821_RPB4_C1_70B.09166.09166.4	NP	7.08075	0.186751	0.725	//16	14//73	5.35675	1.46429	R.NGPNEHPGAK[1736.98]YVIR.D	YDL140C	1	RPB1	NGPNEHPGAKYVIR	403	1//14	11//56	1.724	1.125	R.HGQK[1958.06]GTIGITYR.R	YOR151C	1	RPB2	HGQKGTIGITYR	987	497615	320879	545028	298141	1.82809	0.870336	0.678336
	36	RPB1:403---RPB2:1102	8.74975	0.795528	-0.795528
						0	3.03401	JL102921_110821_RPB4_C1_100B.09512.09512.4	NP	8.74975	0.202843	0.00198	1//16	16//73	5.08325	1.60714	R.NGPNEHPGAK[1643.86]YVIR.D	YDL140C	1	RPB1	NGPNEHPGAKYVIR	403	//12	13//47	3.6665	2	R.HM[147.04]VDDK[1958.06]IHAR.A	YOR151C	1	RPB2	HMVDDKIHAR	1102	588361	358911	644669	329908	1.95409	0.966496	0.774496
						-1	1.95697	JL102921_110821_RPB4_C1_50B.06929.06929.4	N	7.121	0.165351		1//16	16//73	4.6815	1.73077	R.NGPNEHPGAK[1643.87]YVIR.D	YDL140C	1	RPB1	NGPNEHPGAKYVIR	403	//12	11//47	2.4395	1.44444	R.HM[147.04]VDDK[1958.06]IHAR.A	YOR151C	1	RPB2	HMVDDKIHAR	1102	507117	374830	554854	356607	1.55592	0.637771	0.445771
						-1	1.95697	JL102921_110821_RPB4_C1_50B.06911.06911.4	N	6.994	0.1638		1//16	16//73	4.90975	1.73077	R.NGPNEHPGAK[1643.87]YVIR.D	YDL140C	1	RPB1	NGPNEHPGAKYVIR	403	//12	11//47	2.08425	1.22222	R.HM[147.04]VDDK[1958.06]IHAR.A	YOR151C	1	RPB2	HMVDDKIHAR	1102	453179	343956	495729	328602	1.5086	0.593208	0.401208
						0	2.65856	JL102921_110821_RPB4_C1_70B.07317.07317.4	N	6.44825	0.152268		//16	14//73	4.05175	1.57692	R.NGPNEHPGAK[1643.87]YVIR.D	YDL140C	1	RPB1	NGPNEHPGAKYVIR	403	//12	12//47	2.3965	1.61111	R.HM[147.04]VDDK[1958.07]IHAR.A	YOR151C	1	RPB2	HMVDDKIHAR	1102	405998	245103	444884	224824	1.97881	0.984635	0.792635
	37	RPB1:403---RPB2:886	3.52725	0.219839	-0.219839
						2014	-5.19605	JL102921_110821_RPB4_C1_30B.10539.10539.3	P	3.52725	0.102195	0.403	//18	9//80	2.9745	0.575	R.MK[1958.06]HGTYDKLDDDGLIAPGVR.V	YOR151C	1	RPB2	MKHGTYDKLDDDGLIAPGVR	886	//16	6//53	0.55275	0.5	R.NGPNEHPGAK[2607.36]YVIR.D	YDL140C	1	RPB1	NGPNEHPGAKYVIR	403	2333006	2219292	2.5466e+06	2.18667e+06	1.1646	0.219839	0.0278394
	38	RPB1:1217---RPB2:1102	5.7355	0.268182	-0.268182
						0	0.53893	JL102921_110821_RPB4_C1_70B.06465.06465.3	NP	5.7355	0.205784	0.514	//12	13//42	3.8845	1.7	R.HM[147.04]VDDK[1170.72]IHAR.A	YOR151C	1	RPB2	HMVDDKIHAR	1102	//6	7//20	1.851	1.66667	R.IK[1643.86]QTFK.N	YDL140C	1	RPB1	IKQTFK	1217	169994	140825	185811	136286	1.36339	0.447197	0.255197
						0	2.80447	JL102921_110821_RPB4_C1_50B.06039.06039.4	N	5.2495	0.180768		//12	13//53	3.6225	2.05556	R.HM[147.04]VDDK[1170.73]IHAR.A	YOR151C	1	RPB2	HMVDDKIHAR	1102	//6	8//26	1.627	2	R.IK[1643.87]QTFK.N	YDL140C	1	RPB1	IKQTFK	1217	586303	637568	639011	637632	1.00216	0.00311533	-0.188885
						0	0.056911	JL102921_110821_RPB4_C1_70B.06478.06478.3	NP	5.1895	0.180595	0.436	//12	11//42	3.614	1.5	R.HM[147.04]VDDK[1170.72]IHAR.A	YOR151C	1	RPB2	HMVDDKIHAR	1102	//6	6//20	1.5755	1.33333	R.IK[1643.86]QTFK.N	YDL140C	1	RPB1	IKQTFK	1217	155481	136257	169858	132878	1.2783	0.354232	0.162232
	39	RPB1:1003---RPB2:987	8.343	-0.158935	0.158935
						-577	-21.0642	JL102921_110821_RPB4_C1_30B.08517.08517.6	P	8.343	0.260686	0.00343	//14	10//70	2.2875	1.33333	R.HGQK[1676.94]GTIGITYR.R	YOR151C	1	RPB2	HGQKGTIGITYR	987	//11	13//65	6.0555	1.72727	R.GK[1736.98]NEIIQNAQR.D	YDL140C	1	RPB1	GKNEIIQNAQR	1003	1.42313e+06	1.71228e+06	1.54907e+06	1.72948e+06	0.895686	-0.158935	-0.350935
	40	RPB1:1003---RPB2:1102	10.3745	0.517324	-0.517324
						0	2.99834	JL102921_110821_RPB4_C1_50B.06832.06832.4	N	10.3745	0.296906		//11	20//54	7.50525	3.1	R.GK[1643.87]NEIIQNAQR.D	YDL140C	1	RPB1	GKNEIIQNAQR	1003	//12	11//47	2.86925	1.44444	R.HM[147.04]VDDK[1676.95]IHAR.A	YOR151C	1	RPB2	HMVDDKIHAR	1102	745573	442111	817080	404043	2.02226	1.01597	0.82397
						-1	1.97977	JL102921_110821_RPB4_C1_70B.07265.07265.4	N	6.19375	0.210307		//11	15//54	5.06675	2.25	R.GK[1643.86]NEIIQNAQR.D	YDL140C	1	RPB1	GKNEIIQNAQR	1003	//12	7//47	1.127	0.722222	R.HM[147.04]VDDK[1676.94]IHAR.A	YOR151C	1	RPB2	HMVDDKIHAR	1102	250276	269541	272807	269298	1.01303	0.0186788	-0.173321
	41	RPB1:1003---RPB2:507	5.6595	-0.264221	0.264221
						0	5.53576	JL102921_110821_RPB4_C1.06407.06407.4	P	5.6595	0.211566	0.127	1//11	15//57	4.7745	1.81818	R.GK[1290.79]NEIIQNAQR.D	YDL140C	1	RPB1	GKNEIIQNAQR	1003	//10	5//34	0.885	0.8125	R.DGK[1676.94]LAKPR.Q	YOR151C	1	RPB2	DGKLAKPR	507	307839	395715	334772	402057	0.832648	-0.264221	-0.456221
	42	RPB1:843---RPB2:1102	7.9225	0.784929	-0.784929
						0	2.15001	JL102921_110821_RPB4_C1_100B.14526.14526.6	P	7.9225	0.267548	0.233	//19	19//131	7.1515	1.58824	R.LVK[1643.86]ALEDIM[147.04]VHYDNTTR.N	YDL140C	1	RPB1	LVKALEDIMVHYDNTTR	843	//12	5//58	0.771	0.6	R.HM[147.04]VDDK[2440.29]IHAR.A	YOR151C	1	RPB2	HMVDDKIHAR	1102	815905	530724	893588	493919	1.80918	0.855335	0.663335
						0	0.189341	JL102921_110821_RPB4_C1_100B.14535.14535.6	P	6.76575	0.219237	0.479	//19	18//131	6.23125	1.38235	R.LVK[1643.86]ALEDIM[147.04]VHYDNTTR.N	YDL140C	1	RPB1	LVKALEDIMVHYDNTTR	843	//12	4//58	0.5345	0.45	R.HM[147.04]VDDK[2440.29]IHAR.A	YOR151C	1	RPB2	HMVDDKIHAR	1102	840510	518106	920884	477229	1.92965	0.948338	0.756338
						0	1.84792	JL102921_110821_RPB4_C1_100B.14511.14511.4	NP	6.5465	0.190294	0.234	1//19	19//101	5.3135	1.38235	R.LVK[1643.86]ALEDIM[147.04]VHYDNTTR.N	YDL140C	1	RPB1	LVKALEDIMVHYDNTTR	843	1//12	9//47	1.233	0.95	R.HM[147.04]VDDK[2440.29]IHAR.A	YOR151C	1	RPB2	HMVDDKIHAR	1102	282538	228912	308890	220837	1.39872	0.484111	0.292111
						0	5.30114	JL102921_110821_RPB4_C1_100B.14509.14509.5	NP	5.70525	0.178565	0.641	2//19	18//131	3.91775	1.23529	R.LVK[1643.86]ALEDIM[147.04]VHYDNTTR.N	YDL140C	1	RPB1	LVKALEDIMVHYDNTTR	843	//12	9//58	1.7875	1.2	R.HM[147.04]VDDK[2440.29]IHAR.A	YOR151C	1	RPB2	HMVDDKIHAR	1102	1.1664e+06	611065	1.27925e+06	543170	2.35516	1.23583	1.04383
						-1	2.0543	JL102921_110821_RPB4_C1_100B.14520.14520.4	P	4.8105	0.13702	0.296	//19	16//101	3.42575	1	R.LVK[1643.86]ALEDIM[147.04]VHYDNTTR.N	YDL140C	1	RPB1	LVKALEDIMVHYDNTTR	843	//12	9//47	1.38475	1.25	R.HM[147.04]VDDK[2440.29]IHAR.A	YOR151C	1	RPB2	HMVDDKIHAR	1102	331934	282754	362725	274697	1.32045	0.401034	0.209034
	43	RPB1:461---RPB2:1102	8.04	1.19567	-1.19567
						0	4.62198	JL102921_110821_RPB4_C1_100B.13304.13304.4	NP	8.04	0.249542	5.89e-06	//12	12//47	3.2005	1.8	R.HM[147.04]VDDK[1615.95]IHAR.A	YOR151C	1	RPB2	HMVDDKIHAR	1102	//10	16//47	4.8395	2.15	R.VK[1643.86]VIPYSTFR.L	YDL140C	1	RPB1	VKVIPYSTFR	461	2056430	768967	2.25914e+06	617352	3.6594	1.87161	1.67961
						0	3.74758	JL102921_110821_RPB4_C1_50B.10727.10727.4	N	7.983	0.232917		//12	13//47	3.031	1.88889	R.HM[147.04]VDDK[1615.96]IHAR.A	YOR151C	1	RPB2	HMVDDKIHAR	1102	//10	16//47	4.952	2.55556	R.VK[1643.87]VIPYSTFR.L	YDL140C	1	RPB1	VKVIPYSTFR	461	1.26467e+06	723312	1.38629e+06	655985	2.1133	1.0795	0.887498
						-1	4.47742	JL102921_110821_RPB4_C1_50B.10716.10716.4	N	7.1755	0.211804		//12	13//47	3.37	2.22222	R.HM[147.04]VDDK[1615.94]IHAR.A	YOR151C	1	RPB2	HMVDDKIHAR	1102	//10	15//47	3.8055	2.11111	R.VK[1643.85]VIPYSTFR.L	YDL140C	1	RPB1	VKVIPYSTFR	461	1232977	749805	1.351e+06	688782	1.96144	0.971913	0.779913
						0	2.47133	JL102921_110821_RPB4_C1_70B.10732.10732.4	NP	6.31825	0.204656	0.0201	//12	10//47	2.5905	1.4	R.HM[147.04]VDDK[1615.95]IHAR.A	YOR151C	1	RPB2	HMVDDKIHAR	1102	//10	14//47	3.72775	2.05	R.VK[1643.86]VIPYSTFR.L	YDL140C	1	RPB1	VKVIPYSTFR	461	1.89686e+06	1.07427e+06	2.0794e+06	972190	2.13888	1.09686	0.904859
						0	0.679117	JL102921_110821_RPB4_C1_100B.13181.13181.4	NP	5.97675	0.203049	0.000118	1//12	12//47	2.546	1.65	R.HM[147.04]VDDK[1615.95]IHAR.A	YOR151C	1	RPB2	HMVDDKIHAR	1102	//10	13//47	3.43075	1.65	R.VK[1643.86]VIPYSTFR.L	YDL140C	1	RPB1	VKVIPYSTFR	461	705175	376170	773319	335819	2.30278	1.20338	1.01138
						-1	1.0026	JL102921_110821_RPB4_C1.10868.10868.4	N	5.8675	0.16196		//12	11//46	2.542	1.77778	R.HMVDDK[1615.96]IHAR.A	YOR151C	1	RPB2	HMVDDKIHAR	1102	//10	13//47	3.3255	1.83333	R.VK[1627.87]VIPYSTFR.L	YDL140C	1	RPB1	VKVIPYSTFR	461	1.14153e+06	1.14558e+06	1.24532e+06	1.1358e+06	1.09643	0.132808	-0.0591916
						0	2.28723	JL102921_110821_RPB4_C1_70B.10738.10738.5	NP	5.8015	0.205825	0.438	1//12	9//58	1.1035	1.1	R.HM[147.04]VDDK[1615.95]IHAR.A	YOR151C	1	RPB2	HMVDDKIHAR	1102	//10	13//57	4.698	1.7	R.VK[1643.86]VIPYSTFR.L	YDL140C	1	RPB1	VKVIPYSTFR	461	1.7877e+06	1.24764e+06	1.95688e+06	1.17577e+06	1.66433	0.734942	0.542942
						0	4.77322	JL102921_110821_RPB4_C1_50B.10742.10742.5	N	5.7065	0.200049		//12	8//58	1.1525	1.16667	R.HM[147.04]VDDK[1615.97]IHAR.A	YOR151C	1	RPB2	HMVDDKIHAR	1102	1//10	14//57	4.554	1.94444	R.VK[1643.88]VIPYSTFR.L	YDL140C	1	RPB1	VKVIPYSTFR	461	1.5799e+06	815696	1.7329e+06	722490	2.39851	1.26214	1.07014
						0	4.07944	JL102921_110821_RPB4_C1_100B.13189.13189.5	NP	5.67675	0.227808	0.0403	//12	9//58	1.2645	1.25	R.HM[147.04]VDDK[1615.95]IHAR.A	YOR151C	1	RPB2	HMVDDKIHAR	1102	//10	13//57	4.41225	1.7	R.VK[1643.86]VIPYSTFR.L	YDL140C	1	RPB1	VKVIPYSTFR	461	1.15764e+06	508442	1.27083e+06	430912	2.94916	1.56031	1.36831
						-1	2.8027	JL102921_110821_RPB4_C1_50B.10707.10707.5	N	5.32725	0.200322		//12	8//58	0.92425	1	R.HM[147.04]VDDK[1615.95]IHAR.A	YOR151C	1	RPB2	HMVDDKIHAR	1102	//10	12//57	4.403	1.83333	R.VK[1643.86]VIPYSTFR.L	YDL140C	1	RPB1	VKVIPYSTFR	461	1.58706e+06	1.0633e+06	1.73779e+06	994913	1.74668	0.804614	0.612614
						0	0.270994	JL102921_110821_RPB4_C1_100B.13200.13200.5	NP	5.24525	0.196635	0.00856	//12	8//58	0.989	1.05	R.HM[147.04]VDDK[1615.95]IHAR.A	YOR151C	1	RPB2	HMVDDKIHAR	1102	//10	13//57	4.25625	1.55	R.VK[1643.86]VIPYSTFR.L	YDL140C	1	RPB1	VKVIPYSTFR	461	1.42345e+06	526218	1.56384e+06	420645	3.71772	1.89442	1.70242
						0	2.28723	JL102921_110821_RPB4_C1_70B.11073.11073.5	NP	5.184	0.209717	0.619	//12	7//58	1.1065	0.75	R.HM[147.04]VDDK[1615.95]IHAR.A	YOR151C	1	RPB2	HMVDDKIHAR	1102	//10	13//57	4.0775	1.7	R.VK[1643.86]VIPYSTFR.L	YDL140C	1	RPB1	VKVIPYSTFR	461	860283	560454	942181	521736	1.80586	0.852685	0.660685
						0	3.85054	JL102921_110821_RPB4_C1_100B.13234.13234.6	NP	5.1435	0.171444	0.00644	//12	9//58	1.4655	1.05	R.HM[147.04]VDDK[1615.95]IHAR.A	YOR151C	1	RPB2	HMVDDKIHAR	1102	//10	13//57	3.678	1.55	R.VK[1643.86]VIPYSTFR.L	YDL140C	1	RPB1	VKVIPYSTFR	461	1.16259e+06	357469	1.27813e+06	263759	4.8458	2.27674	2.08474
						0	2.82977	JL102921_110821_RPB4_C1_100B.13435.13435.4	NP	5.04375	0.175468	0.416	1//12	11//47	2.282	1.5	R.HM[147.04]VDDK[1615.95]IHAR.A	YOR151C	1	RPB2	HMVDDKIHAR	1102	//10	15//47	2.76175	1.9	R.VK[1643.86]VIPYSTFR.L	YDL140C	1	RPB1	VKVIPYSTFR	461	927468	765164	1.01381e+06	740077	1.36986	0.454033	0.262033
						0	2.28723	JL102921_110821_RPB4_C1_70B.11077.11077.5	NP	5.0255	0.218733	0.612	//12	8//58	1.038	0.9	R.HM[147.04]VDDK[1615.95]IHAR.A	YOR151C	1	RPB2	HMVDDKIHAR	1102	//10	12//57	3.9875	1.65	R.VK[1643.86]VIPYSTFR.L	YDL140C	1	RPB1	VKVIPYSTFR	461	913037	573288	1.00022e+06	529967	1.88732	0.91634	0.72434
						0	2.03593	JL102921_110821_RPB4_C1_70B.10752.10752.6	P	4.99875	0.151622	0.24	//12	9//58	1.568	1.05	R.HM[147.04]VDDK[1615.95]IHAR.A	YOR151C	1	RPB2	HMVDDKIHAR	1102	//10	12//57	3.43075	1.4	R.VK[1643.86]VIPYSTFR.L	YDL140C	1	RPB1	VKVIPYSTFR	461	1.36812e+06	505993	1.50305e+06	404546	3.7154	1.89352	1.70152
						0	1.22943	JL102921_110821_RPB4_C1_100B.13216.13216.6	P	4.8515	0.150839	0.00309	//12	9//58	1.4335	1.05	R.HM[147.04]VDDK[1615.95]IHAR.A	YOR151C	1	RPB2	HMVDDKIHAR	1102	//10	11//57	3.418	1.35	R.VK[1643.86]VIPYSTFR.L	YDL140C	1	RPB1	VKVIPYSTFR	461	787826	281883	865639	222484	3.89079	1.96006	1.76806
						0	2.62327	JL102921_110821_RPB4_C1_100B.13450.13450.5	P	4.7115	0.216511	0.23	//12	7//58	0.8105	0.85	R.HM[147.04]VDDK[1615.95]IHAR.A	YOR151C	1	RPB2	HMVDDKIHAR	1102	//10	14//57	3.901	1.75	R.VK[1643.86]VIPYSTFR.L	YDL140C	1	RPB1	VKVIPYSTFR	461	881058	504879	965773	458074	2.10833	1.0761	0.884103
						1362	102.224	JL102921_110821_RPB4_C1_100B.13220.13220.3	P	4.4535	0.139239	0.0272	//12	8//36	1.382	1	R.HM[147.04]VDDK[1615.95]IHAR.A	YOR151C	1	RPB2	HMVDDKIHAR	1102	//10	8//37	3.0715	1.1	R.VK[1643.86]VIPYSTFR.L	YDL140C	1	RPB1	VKVIPYSTFR	461	1.28874e+06	404813	1.41671e+06	301821	4.69389	2.23078	2.03878
						-1	5.64275	JL102921_110821_RPB4_C1_100B.13605.13605.6	NP	4.2285	0.168836	0.0119	//12	8//58	1.292	0.9	R.HM[147.04]VDDK[1615.95]IHAR.A	YOR151C	1	RPB2	HMVDDKIHAR	1102	//10	10//57	2.9365	1.3	R.VK[1643.86]VIPYSTFR.L	YDL140C	1	RPB1	VKVIPYSTFR	461	247514	209025	270496	202829	1.33361	0.415341	0.223341
						0	5.73236	JL102921_110821_RPB4_C1_100B.13585.13585.6	P	3.87875	0.146307	0.425	//12	7//58	1.134	0.85	R.HM[147.04]VDDK[1615.95]IHAR.A	YOR151C	1	RPB2	HMVDDKIHAR	1102	//10	10//57	2.74475	1.3	R.VK[1643.86]VIPYSTFR.L	YDL140C	1	RPB1	VKVIPYSTFR	461	294098	247510	321416	240060	1.3389	0.421044	0.229044
	44	RPB1:461---RPB2:987	6.594	1.09446	-1.09446
						0	3.63813	JL102921_110821_RPB4_C1_50B.13301.13301.4	N	6.594	0.196713		//14	13//58	2.2875	1.36364	R.HGQK[1615.96]GTIGITYR.R	YOR151C	1	RPB2	HGQKGTIGITYR	987	//10	13//46	4.3065	1.88889	R.VK[1736.99]VIPYSTFR.L	YDL140C	1	RPB1	VKVIPYSTFR	461	2.05887e+06	1.14107e+06	2.2573e+06	1.02769e+06	2.19648	1.1352	0.943196
						0	-0.0887056	JL102921_110821_RPB4_C1_70B.13286.13286.6	NP	6.08975	0.259879	0.199	//14	12//71	3.1885	1.41667	R.HGQK[1615.95]GTIGITYR.R	YOR151C	1	RPB2	HGQKGTIGITYR	987	1//10	10//56	2.90125	1.3	R.VK[1736.98]VIPYSTFR.L	YDL140C	1	RPB1	VKVIPYSTFR	461	400590	229937	439103	208697	2.10402	1.07315	0.881152
						0	3.15685	JL102921_110821_RPB4_C1_50B.13319.13319.5	N	6.01975	0.219992		//14	13//71	1.931	1.72727	R.HGQK[1615.96]GTIGITYR.R	YOR151C	1	RPB2	HGQKGTIGITYR	987	//10	13//56	4.08875	1.88889	R.VK[1736.99]VIPYSTFR.L	YDL140C	1	RPB1	VKVIPYSTFR	461	3364695	2.02101e+06	3.68709e+06	1.85188e+06	1.99099	0.993489	0.801489
						0	3.01843	JL102921_110821_RPB4_C1_70B.13224.13224.4	NP	4.964	0.16457	0.541	//14	12//58	1.81475	1	R.HGQK[1615.95]GTIGITYR.R	YOR151C	1	RPB2	HGQKGTIGITYR	987	//10	10//46	3.14925	1.25	R.VK[1736.98]VIPYSTFR.L	YDL140C	1	RPB1	VKVIPYSTFR	461	971488	641012	1.06387e+06	598129	1.77867	0.830799	0.638799
						0	2.71045	JL102921_110821_RPB4_C1_70B.13248.13248.5	NP	4.63075	0.159533	0.461	1//14	11//71	1.19725	1.08333	R.HGQK[1615.95]GTIGITYR.R	YOR151C	1	RPB2	HGQKGTIGITYR	987	//10	11//56	3.4335	1.6	R.VK[1736.98]VIPYSTFR.L	YDL140C	1	RPB1	VKVIPYSTFR	461	2.85835e+06	1.21935e+06	3.13828e+06	1.02419e+06	3.06416	1.61549	1.42349
						0	2.94022	JL102921_110821_RPB4_C1_100B.15670.15670.5	N	4.574	0.182982		//14	10//71	1.111	1.13636	R.HGQK[1615.96]GTIGITYR.R	YOR151C	1	RPB2	HGQKGTIGITYR	987	//10	11//56	3.463	1.77778	R.VK[1736.98]VIPYSTFR.L	YDL140C	1	RPB1	VKVIPYSTFR	461	534833	335371	585907	309949	1.89033	0.918638	0.726638
	45	RPB1:461---RPB2:649	5.52525	-0.194004	0.194004
						-2	5.86217	JL102921_110821_RPB4_C1_100B.21421.21421.6	N	5.52525	0.169908		1//17	14//119	3.874	0.868421	R.VYRPLFIVEDDESLGHK[1615.98]ELK.V	YOR151C	1	RPB2	VYRPLFIVEDDESLGHKELK	649	1//10	6//44	1.65125	0.944444	R.VK[2793.54]VIPYSTFR.L	YDL140C	1	RPB1	VKVIPYSTFR	461	537012	660490	584358	668468	0.874176	-0.194004	-0.386004
	46	RPB1:461---RPB2:886	14.4953	1.32392	-1.32392
						0	7.14141	JL102921_110821_RPB4_C1_50B.15446.15446.4	N	14.4953	0.438194		//18	27//120	12.415	2.18421	R.M[147.04]K[1615.98]HGTYDKLDDDGLIAPGVR.V	YOR151C	1	RPB2	MKHGTYDKLDDDGLIAPGVR	886	//10	8//44	2.08025	1.38889	R.VK[2623.38]VIPYSTFR.L	YDL140C	1	RPB1	VKVIPYSTFR	461	1.46108e+06	494338	1.60573e+06	381235	4.21193	2.07448	1.88248
						0	1.53207	JL102921_110821_RPB4_C1_30B.14490.14490.4	P	14.3528	0.450855	0.00238	//18	32//120	13.4693	2.65	R.MK[1615.95]HGTYDKLDDDGLIAPGVR.V	YOR151C	1	RPB2	MKHGTYDKLDDDGLIAPGVR	886	//10	7//44	0.8835	0.85	R.VK[2607.36]VIPYSTFR.L	YDL140C	1	RPB1	VKVIPYSTFR	461	813740	448894	892194	403864	2.20915	1.14349	0.951489
						0	1.53207	JL102921_110821_RPB4_C1_30B.14497.14497.4	NP	14.0608	0.446763	0.0333	//18	32//120	13.065	2.45	R.MK[1615.95]HGTYDKLDDDGLIAPGVR.V	YOR151C	1	RPB2	MKHGTYDKLDDDGLIAPGVR	886	//10	7//44	0.99575	0.9	R.VK[2607.36]VIPYSTFR.L	YDL140C	1	RPB1	VKVIPYSTFR	461	763283	457245	836433	418752	1.99744	0.998155	0.806155
						0	7.14141	JL102921_110821_RPB4_C1_50B.15444.15444.4	N	13.0705	0.396833		//18	26//120	11.8615	2	R.M[147.04]K[1615.98]HGTYDKLDDDGLIAPGVR.V	YOR151C	1	RPB2	MKHGTYDKLDDDGLIAPGVR	886	//10	7//44	1.209	0.944444	R.VK[2623.38]VIPYSTFR.L	YDL140C	1	RPB1	VKVIPYSTFR	461	1.41253e+06	473445	1.55243e+06	363638	4.26917	2.09395	1.90195
						-2	5.3491	JL102921_110821_RPB4_C1_30B.14480.14480.4	N	12.7305	0.418223		//18	30//120	11.67	2.36842	R.MK[1615.97]HGTYDKLDDDGLIAPGVR.V	YOR151C	1	RPB2	MKHGTYDKLDDDGLIAPGVR	886	1//10	8//44	1.0605	1.05556	R.VK[2607.38]VIPYSTFR.L	YDL140C	1	RPB1	VKVIPYSTFR	461	711929	429491	780121	393899	1.98051	0.98587	0.79387
						-1	1.88075	JL102921_110821_RPB4_C1_70B.14960.14960.4	N	11.9648	0.369602		//18	27//120	10.6203	2.02632	R.M[147.04]K[1615.96]HGTYDKLDDDGLIAPGVR.V	YOR151C	1	RPB2	MKHGTYDKLDDDGLIAPGVR	886	//10	7//44	1.3445	0.888889	R.VK[2623.36]VIPYSTFR.L	YDL140C	1	RPB1	VKVIPYSTFR	461	581921	222268	639226	179847	3.55427	1.82955	1.63755
						-1	4.40815	JL102921_110821_RPB4_C1_30B.14498.14498.5	NP	11.8935	0.390028	8.84e-06	//18	27//157	8.31875	1.675	R.MK[1615.95]HGTYDKLDDDGLIAPGVR.V	YOR151C	1	RPB2	MKHGTYDKLDDDGLIAPGVR	886	1//10	16//54	3.57475	1.9	R.VK[2607.36]VIPYSTFR.L	YDL140C	1	RPB1	VKVIPYSTFR	461	1.73707e+06	1.13884e+06	1.90235e+06	1.0614e+06	1.7923	0.841814	0.649814
						0	3.29514	JL102921_110821_RPB4_C1_70B.14973.14973.4	NP	11.7225	0.38036	0.344	//18	25//124	10.2607	1.8	R.M[147.04]K[1615.95]HGTYDKLDDDGLIAPGVR.V	YOR151C	1	RPB2	MKHGTYDKLDDDGLIAPGVR	886	//10	9//44	1.46175	0.9	R.VK[2623.35]VIPYSTFR.L	YDL140C	1	RPB1	VKVIPYSTFR	461	613270	223966	673787	178197	3.78114	1.91882	1.72682
						0	1.38365	JL102921_110821_RPB4_C1_70B.14969.14969.4	NP	10.9893	0.33812	0.0882	//18	24//124	9.6465	1.65	R.M[147.04]K[1615.95]HGTYDKLDDDGLIAPGVR.V	YOR151C	1	RPB2	MKHGTYDKLDDDGLIAPGVR	886	//10	9//44	1.34275	1.05	R.VK[2623.35]VIPYSTFR.L	YDL140C	1	RPB1	VKVIPYSTFR	461	623658	219262	685303	171838	3.98807	1.99569	1.80369
						-1	4.56416	JL102921_110821_RPB4_C1_70B.14946.14946.5	N	10.8752	0.348588		//18	31//157	8.4545	1.81579	R.M[147.04]K[1615.94]HGTYDKLDDDGLIAPGVR.V	YOR151C	1	RPB2	MKHGTYDKLDDDGLIAPGVR	886	//10	13//54	2.42075	1.66667	R.VK[2623.33]VIPYSTFR.L	YDL140C	1	RPB1	VKVIPYSTFR	461	1327143	650410	1.45609e+06	568515	2.56121	1.35683	1.16483
						0	2.71807	JL102921_110821_RPB4_C1_50B.15454.15454.6	N	10.737	0.40843		//18	18//120	7.98175	1.52632	R.M[147.04]K[1615.96]HGTYDKLDDDGLIAPGVR.V	YOR151C	1	RPB2	MKHGTYDKLDDDGLIAPGVR	886	1//10	9//44	2.75525	1.38889	R.VK[2623.36]VIPYSTFR.L	YDL140C	1	RPB1	VKVIPYSTFR	461	2.12798e+06	975525	2.33555e+06	837242	2.78958	1.48005	1.28805
						0	-4.78286	JL102921_110821_RPB4_C1_70B.14957.14957.5	NP	10.546	0.358604	0.000118	//18	28//163	7.91025	1.625	R.M[147.04]K[1615.95]HGTYDKLDDDGLIAPGVR.V	YOR151C	1	RPB2	MKHGTYDKLDDDGLIAPGVR	886	//10	16//54	2.63575	1.8	R.VK[2623.35]VIPYSTFR.L	YDL140C	1	RPB1	VKVIPYSTFR	461	1.56026e+06	705075	1.71259e+06	602629	2.84186	1.50683	1.31483
						-1	-2.11695	JL102921_110821_RPB4_C1_70B.14962.14962.6	NP	10.4262	0.393904	0.285	//18	17//163	7.16575	1.3	R.M[147.04]K[1615.95]HGTYDKLDDDGLIAPGVR.V	YOR151C	1	RPB2	MKHGTYDKLDDDGLIAPGVR	886	1//10	13//54	3.2605	1.55	R.VK[2623.35]VIPYSTFR.L	YDL140C	1	RPB1	VKVIPYSTFR	461	1.03353e+06	485657	1.1342e+06	419722	2.70226	1.43417	1.24217
						-1	5.98038	JL102921_110821_RPB4_C1_30B.14489.14489.5	NP	10.3015	0.350266	0.00231	//18	25//157	7.40975	1.475	R.MK[1615.95]HGTYDKLDDDGLIAPGVR.V	YOR151C	1	RPB2	MKHGTYDKLDDDGLIAPGVR	886	1//10	15//54	2.89175	1.7	R.VK[2607.36]VIPYSTFR.L	YDL140C	1	RPB1	VKVIPYSTFR	461	1.56282e+06	1.01942e+06	1.71158e+06	949216	1.80315	0.850521	0.658521
						-1	0.378036	JL102921_110821_RPB4_C1_50B.15426.15426.5	N	10.2082	0.326858		//18	29//157	7.52975	1.92105	R.M[147.04]K[1615.95]HGTYDKLDDDGLIAPGVR.V	YOR151C	1	RPB2	MKHGTYDKLDDDGLIAPGVR	886	//10	14//54	2.6785	1.77778	R.VK[2623.35]VIPYSTFR.L	YDL140C	1	RPB1	VKVIPYSTFR	461	2.09875e+06	1.17362e+06	2.3009e+06	1.05912e+06	2.17247	1.11934	0.927336
						-2	3.05363	JL102921_110821_RPB4_C1.14500.14500.4	N	10.12	0.293057		//18	26//120	8.6565	1.76316	R.MK[1615.94]HGTYDKLDDDGLIAPGVR.V	YOR151C	1	RPB2	MKHGTYDKLDDDGLIAPGVR	886	//10	9//44	1.4635	1.61111	R.VK[2607.34]VIPYSTFR.L	YDL140C	1	RPB1	VKVIPYSTFR	461	468282	311254	512787	290819	1.76325	0.818241	0.626241
						0	7.4638	JL102921_110821_RPB4_C1_50B.15433.15433.6	N	9.97675	0.394042		//18	17//120	7.03425	1.36842	R.M[147.04]K[1615.98]HGTYDKLDDDGLIAPGVR.V	YOR151C	1	RPB2	MKHGTYDKLDDDGLIAPGVR	886	//10	8//44	2.9425	1.33333	R.VK[2623.38]VIPYSTFR.L	YDL140C	1	RPB1	VKVIPYSTFR	461	1.44723e+06	913410	1.58536e+06	845231	1.87566	0.907395	0.715395
						-2	8.32159	JL102921_110821_RPB4_C1_70B.14937.14937.5	N	9.739	0.354184		//18	24//157	7.0035	1.65789	R.M[147.04]K[1615.92]HGTYDKLDDDGLIAPGVR.V	YOR151C	1	RPB2	MKHGTYDKLDDDGLIAPGVR	886	1//10	13//54	2.7355	1.61111	R.VK[2623.32]VIPYSTFR.L	YDL140C	1	RPB1	VKVIPYSTFR	461	1.28593e+06	710004	1.40991e+06	638909	2.20674	1.14192	0.949918
						-1	4.54345	JL102921_110821_RPB4_C1.14509.14509.4	N	9.64375	0.279032		//18	23//120	8.2385	1.63158	R.MK[1615.97]HGTYDKLDDDGLIAPGVR.V	YOR151C	1	RPB2	MKHGTYDKLDDDGLIAPGVR	886	//10	7//44	1.40525	1	R.VK[2607.37]VIPYSTFR.L	YDL140C	1	RPB1	VKVIPYSTFR	461	456267	314744	499490	296020	1.68735	0.754763	0.562763
						-1	3.45506	JL102921_110821_RPB4_C1_50B.15420.15420.6	N	8.443	0.334767		//18	13//120	6.02675	1	R.M[147.04]K[1615.97]HGTYDKLDDDGLIAPGVR.V	YOR151C	1	RPB2	MKHGTYDKLDDDGLIAPGVR	886	1//10	8//44	2.41625	1.16667	R.VK[2623.36]VIPYSTFR.L	YDL140C	1	RPB1	VKVIPYSTFR	461	983449	773187	1.07546e+06	742637	1.44817	0.534227	0.342227
						0	5.12748	JL102921_110821_RPB4_C1_50B.15414.15414.5	N	8.2645	0.27313		//18	23//157	6.112	1.36842	R.M[147.04]K[1615.97]HGTYDKLDDDGLIAPGVR.V	YOR151C	1	RPB2	MKHGTYDKLDDDGLIAPGVR	886	//10	13//54	2.1525	1.61111	R.VK[2623.37]VIPYSTFR.L	YDL140C	1	RPB1	VKVIPYSTFR	461	1.50896e+06	1.09709e+06	1.65122e+06	1.04098e+06	1.58622	0.665597	0.473597
						-1	3.6015	JL102921_110821_RPB4_C1_50B.15447.15447.3	N	7.972	0.253772		//18	18//83	6.1825	1.10526	R.M[147.04]K[1615.94]HGTYDKLDDDGLIAPGVR.V	YOR151C	1	RPB2	MKHGTYDKLDDDGLIAPGVR	886	//10	7//34	1.7895	1.16667	R.VK[2623.34]VIPYSTFR.L	YDL140C	1	RPB1	VKVIPYSTFR	461	356208	91907.6	391823	61372.6	6.38432	2.67453	2.48253
	47	RPB1:461---RPB2:775	13.3413	0.537792	-0.537792
						-1	1.10513	JL102921_110821_RPB4_C1_50B.17946.17946.4	N	13.3413	0.361405		//16	28//129	11.6837	2.02381	R.NTYQSAM[147.04]GK[1615.96]QAM[147.04]GVFLTNYNVR.M	YOR151C	1	RPB2	NTYQSAMGKQAMGVFLTNYNVR	775	//10	7//44	1.6575	1.33333	R.VK[2931.45]VIPYSTFR.L	YDL140C	1	RPB1	VKVIPYSTFR	461	298064	208834	326261	196936	1.65669	0.7283	0.5363
						-2	2.77082	JL102921_110821_RPB4_C1_50B.17947.17947.5	N	10.921	0.334615		//16	25//172	7.833	1.57143	R.NTYQSAM[147.04]GK[1615.96]QAM[147.04]GVFLTNYNVR.M	YOR151C	1	RPB2	NTYQSAMGKQAMGVFLTNYNVR	775	//10	9//54	3.088	1.27778	R.VK[2931.46]VIPYSTFR.L	YDL140C	1	RPB1	VKVIPYSTFR	461	511580	450222	558860	439299	1.27216	0.347284	0.155284
	48	RPB1:452---RPB2:886	9.874	0.518171	-0.518171
						0	3.5129	JL102921_110821_RPB4_C1_100B.12324.12324.4	N	9.874	0.328231		1//18	26//117	8.21625	1.76316	R.MK[2007.97]HGTYDKLDDDGLIAPGVR.V	YOR151C	1	RPB2	MKHGTYDKLDDDGLIAPGVR	886	//15	7//70	1.65775	0.708333	R.QPSLHK[2607.34]M[147.04]SM[147.04]M[147.04]AHR.V	YDL140C	1	RPB1	QPSLHKMSMMAHR	452	117902	121504	128583	120822	1.06423	0.0898089	-0.102191
						1	-2.16802	JL102921_110821_RPB4_C1_100B.12312.12312.5	NP	8.401	0.293983	0.603	//18	27//160	7.51275	1.65	R.M[147.04]K[1991.99]HGTYDKLDDDGLIAPGVR.V	YOR151C	1	RPB2	MKHGTYDKLDDDGLIAPGVR	886	//15	5//88	0.88825	0.384615	R.QPSLHK[2623.35]MSM[147.04]M[147.04]AHR.V	YDL140C	1	RPB1	QPSLHKMSMMAHR	452	435365	251411	477203	228483	2.08857	1.06252	0.870518
						-1	9.65057	JL102921_110821_RPB4_C1_70B.09930.09930.5	N	7.8445	0.248684		//18	24//154	6.79	1.63158	R.M[147.04]K[1991.95]HGTYDKLDDDGLIAPGVR.V	YOR151C	1	RPB2	MKHGTYDKLDDDGLIAPGVR	886	//15	9//88	1.0545	0.583333	R.QPSLHK[2623.31]MSM[147.04]M[147.04]AHR.V	YDL140C	1	RPB1	QPSLHKMSMMAHR	452	380638	313034	416083	302635	1.37487	0.459294	0.267294
						0	3.5129	JL102921_110821_RPB4_C1_100B.12316.12316.4	N	6.9145	0.230714		//18	17//117	5.351	1.07895	R.MK[2007.97]HGTYDKLDDDGLIAPGVR.V	YOR151C	1	RPB2	MKHGTYDKLDDDGLIAPGVR	886	//15	9//70	1.5635	0.75	R.QPSLHK[2607.34]M[147.04]SM[147.04]M[147.04]AHR.V	YDL140C	1	RPB1	QPSLHKMSMMAHR	452	129351	128278	141130	127011	1.11116	0.152072	-0.039928
						-1	2.81887	JL102921_110821_RPB4_C1_50B.09901.09901.6	N	5.45725	0.198749		//18	12//117	4.292	0.842105	R.MK[2007.98]HGTYDKLDDDGLIAPGVR.V	YOR151C	1	RPB2	MKHGTYDKLDDDGLIAPGVR	886	//15	7//70	1.16525	0.708333	R.QPSLHK[2607.34]M[147.04]SM[147.04]M[147.04]AHR.V	YDL140C	1	RPB1	QPSLHKMSMMAHR	452	496369	328212	543564	306373	1.77419	0.827161	0.635161
	49	RPB1:452---RPB2:987	6.166	1.19317	-1.19317
						0	2.59418	JL102921_110821_RPB4_C1_70B.07787.07787.6	N	6.166	0.290911		//14	7//64	1.667	0.909091	R.Q[111.03]PSLHK[1736.98]M[147.04]SM[147.04]M[147.04]AHR.V	YDL140C	1	RPB1	QPSLHKMSMMAHR	452	1//14	12//56	4.499	1.68182	R.HGQK[1990.97]GTIGITYR.R	YOR151C	1	RPB2	HGQKGTIGITYR	987	1.26588e+06	951152	1.38485e+06	907266	1.5264	0.610136	0.418136
						0	3.24835	JL102921_110821_RPB4_C1_100B.10298.10298.5	N	5.448	0.190706		//14	11//81	1.622	0.818182	R.Q[111.03]PSLHK[1736.99]M[147.04]SM[147.04]M[147.04]AHR.V	YDL140C	1	RPB1	QPSLHKMSMMAHR	452	//14	12//69	3.826	1.68182	R.HGQK[1990.97]GTIGITYR.R	YOR151C	1	RPB2	HGQKGTIGITYR	987	1.40173e+06	501259	1.54018e+06	395544	3.89383	1.96119	1.76919
						0	3.93792	JL102921_110821_RPB4_C1_100B.08945.08945.5	N	5.16125	0.18709		//15	8//90	1.19425	0.666667	R.QPSLHK[1736.99]M[147.04]SM[147.04]M[147.04]AHR.V	YDL140C	1	RPB1	QPSLHKMSMMAHR	452	//14	11//69	3.967	1.63636	R.HGQK[2008]GTIGITYR.R	YOR151C	1	RPB2	HGQKGTIGITYR	987	327130	168366	358816	149012	2.40797	1.26782	1.07582
						0	2.59418	JL102921_110821_RPB4_C1_100B.10290.10290.6	N	5.0785	0.254224		1//14	7//64	1.036	0.818182	R.Q[111.03]PSLHK[1736.98]M[147.04]SM[147.04]M[147.04]AHR.V	YDL140C	1	RPB1	QPSLHKMSMMAHR	452	1//14	11//56	4.0425	1.5	R.HGQK[1990.97]GTIGITYR.R	YOR151C	1	RPB2	HGQKGTIGITYR	987	759173	380119	832837	334107	2.49273	1.31773	1.12573
						0	3.93792	JL102921_110821_RPB4_C1_100B.08947.08947.5	N	5.07625	0.181505		//15	7//90	1.17475	0.708333	R.QPSLHK[1736.99]M[147.04]SM[147.04]M[147.04]AHR.V	YDL140C	1	RPB1	QPSLHKMSMMAHR	452	//14	11//69	3.9015	1.63636	R.HGQK[2008]GTIGITYR.R	YOR151C	1	RPB2	HGQKGTIGITYR	987	309497	152972	339552	134008	2.53382	1.34131	1.14931
						0	3.72629	JL102921_110821_RPB4_C1_70B.07780.07780.5	N	4.9225	0.158857		//14	8//81	1.40725	0.727273	R.Q[111.03]PSLHK[1736.99]M[147.04]SM[147.04]M[147.04]AHR.V	YDL140C	1	RPB1	QPSLHKMSMMAHR	452	//14	11//69	3.51525	1.5	R.HGQK[1990.97]GTIGITYR.R	YOR151C	1	RPB2	HGQKGTIGITYR	987	1.45902e+06	606067	1.6021e+06	504758	3.174	1.6663	1.4743
						0	2.70889	JL102921_110821_RPB4_C1_50B.07399.07399.6	N	4.78975	0.203365		//14	6//64	1.06825	0.590909	R.Q[111.03]PSLHK[1736.98]M[147.04]SM[147.04]M[147.04]AHR.V	YDL140C	1	RPB1	QPSLHKMSMMAHR	452	//14	10//56	3.7215	1.45455	R.HGQK[1990.97]GTIGITYR.R	YOR151C	1	RPB2	HGQKGTIGITYR	987	1.35243e+06	1.31216e+06	1.47594e+06	1.2959e+06	1.13893	0.187674	-0.00432557
	50	RPB1:323---RPB2:1102	2.63225	-0.367065	0.367065
						0	2.80096	JL102921_110821_RPB4_C1_100B.08290.08290.6	P	2.63225	0.090356	0.694	//12	10//59	1.99725	1	R.HM[147.04]VDDK[1405.86]IHAR.A	YOR151C	1	RPB2	HMVDDKIHAR	1102	1//11	6//48	0.635	0.722222	K.SGRPVK[1643.86]SIR.A	YDL140C	1	RPB1	SGRPVKSIR	323	296492	406695	322122	415449	0.775358	-0.367065	-0.559065
	51	RPB1:687---RPB2:1102	5.2865	-0.125774	0.125774
						-2	9.25015	JL102921_110821_RPB4_C1_30B.08489.08489.4	P	5.2865	0.174256	0.513	//13	14//52	5.114	1.86364	R.EITETIAEAK[1643.86]K.K	YDL140C	1	RPB1	EITETIAEAKK	687	//12	3//47	0.1725	0.15	R.HM[147.04]VDDK[1638.93]IHAR.A	YOR151C	1	RPB2	HMVDDKIHAR	1102	533729	628971	581120	634056	0.916512	-0.125774	-0.317774
	52	RPB1:687---RPB2:1057	3.70775	0.534175	-0.534175
						-2	5.13519	JL102921_110821_RPB4_C1.27039.27039.5	P	3.70775	0.0785957	0.484	//16	20//213	3.561	0.777778	K.VAALSGNEGDASPFTDITVEGISK[1638.93]LLR.E	YOR151C	1	RPB2	VAALSGNEGDASPFTDITVEGISKLLR	1057	1//13	3//60	0.14675	0.136364	R.EITETIAEAK[3166.7]K.K	YDL140C	1	RPB1	EITETIAEAKK	687	356531	280313	389888	269239	1.44811	0.534175	0.342175
	53	RPB1:15---RPB2:1148	9.35625	0.0243956	-0.0243956
						-2	4.84444	JL102921_110821_RPB4_C1_100B.22914.22914.4	N	9.35625	0.258267		1//18	18//91	5.45875	1.73333	R.TVK[2128.05]EVQFGLFSPEEVR.A	YDL140C	1	RPB1	TVKEVQFGLFSPEEVR	15	1//17	11//81	3.8975	1.07143	R.DC[160.03]M[147.04]IAHGAASFLK[2271.22]ER.L	YOR151C	1	RPB2	DCMIAHGAASFLKER	1148	272700	284328	297364	283093	1.05041	0.0709526	-0.121047
						0	5.80646	JL102921_110821_RPB4_C1_50B.21342.21342.4	N	9.31825	0.251865		//18	17//91	5.34225	1.53333	R.TVK[2128.09]EVQFGLFSPEEVR.A	YDL140C	1	RPB1	TVKEVQFGLFSPEEVR	15	//17	11//81	3.976	1.14286	R.DC[160.03]M[147.04]IAHGAASFLK[2271.26]ER.L	YOR151C	1	RPB2	DCMIAHGAASFLKER	1148	240089	272882	261530	274129	0.954039	-0.0678794	-0.259879
						-2	1.34442	JL102921_110821_RPB4_C1_50B.21355.21355.4	N	9.035	0.254974		//18	17//91	5.265	1.43333	R.TVK[2128.07]EVQFGLFSPEEVR.A	YDL140C	1	RPB1	TVKEVQFGLFSPEEVR	15	1//17	11//81	3.77	0.964286	R.DC[160.03]M[147.04]IAHGAASFLK[2271.24]ER.L	YOR151C	1	RPB2	DCMIAHGAASFLKER	1148	249313	268052	271764	267762	1.01494	0.0214008	-0.170599
						0	6.4383	JL102921_110821_RPB4_C1_100B.22952.22952.4	N	7.65025	0.231063		//18	15//91	4.112	1.23333	R.TVK[2128.09]EVQFGLFSPEEVR.A	YDL140C	1	RPB1	TVKEVQFGLFSPEEVR	15	1//17	11//81	3.53825	0.964286	R.DC[160.03]M[147.04]IAHGAASFLK[2271.26]ER.L	YOR151C	1	RPB2	DCMIAHGAASFLKER	1148	294299	306439	320922	305064	1.05198	0.0731084	-0.118892
	54	RPB1:15---RPB2:1102	10.288	0.443919	-0.443919
						0	2.22042	JL102921_110821_RPB4_C1_100B.17161.17161.5	P	10.288	0.383766	0.00118	//18	27//119	9.739	2.46875	R.TVK[1643.86]EVQFGLFSPEEVR.A	YDL140C	1	RPB1	TVKEVQFGLFSPEEVR	15	//12	7//58	0.549	0.7	R.HM[147.04]VDDK[2271.23]IHAR.A	YOR151C	1	RPB2	HMVDDKIHAR	1102	1086420	913709	1.18734e+06	886125	1.33993	0.422155	0.230155
						0	-0.578747	JL102921_110821_RPB4_C1_70B.14717.14717.5	P	9.083	0.317971	0.158	//18	27//119	8.31325	2.40625	R.TVK[1643.86]EVQFGLFSPEEVR.A	YDL140C	1	RPB1	TVKEVQFGLFSPEEVR	15	//12	10//58	0.76975	1	R.HM[147.04]VDDK[2271.23]IHAR.A	YOR151C	1	RPB2	HMVDDKIHAR	1102	575760	424628	629970	403842	1.55994	0.641493	0.449493
						0	6.01283	JL102921_110821_RPB4_C1_100B.17169.17169.5	P	8.85325	0.316651	0.000743	//18	27//119	8.29325	2.4375	R.TVK[1643.86]EVQFGLFSPEEVR.A	YDL140C	1	RPB1	TVKEVQFGLFSPEEVR	15	//12	7//58	0.56	0.7	R.HM[147.04]VDDK[2271.23]IHAR.A	YOR151C	1	RPB2	HMVDDKIHAR	1102	1.32445e+06	1.22321e+06	1.44615e+06	1.2009e+06	1.20423	0.268109	0.0761086
	55	RPB1:15---RPB2:344	6.646	-0.0499714	0.0499714
						727	-140.535	JL102921_110821_RPB4_C1.21562.21562.3	P	6.646	0.204524	0.557	//18	14//71	6.60625	1.34375	R.TVK[1193.76]EVQFGLFSPEEVR.A	YDL140C	1	RPB1	TVKEVQFGLFSPEEVR	15	//10	1//23	0.03975	0.0625	R.GTALGIK[2271.23]K.E	YOR151C	1	RPB2	GTALGIKK	344	950995	1.06888e+06	1.03607e+06	1.07258e+06	0.965955	-0.0499714	-0.241971
	56	RPB1:431---RPB2:886	5.3125	0.452074	-0.452074
						0	2.63717	JL102921_110821_RPB4_C1_70B.16123.16123.5	N	5.3125	0.156688		//18	12//154	3.22675	0.684211	R.M[147.04]K[2069.13]HGTYDKLDDDGLIAPGVR.V	YOR151C	1	RPB2	MKHGTYDKLDDDGLIAPGVR	886	1//16	12//96	2.08575	0.961538	R.AGDIQLQYGWK[2623.36]VER.H	YDL140C	1	RPB1	AGDIQLQYGWKVER	431	637034	515293	696460	497000	1.40133	0.486795	0.294795
						-1	1.15693	JL102921_110821_RPB4_C1_70B.16118.16118.6	N	4.0255	0.152802		//18	7//117	2.9015	0.552632	R.M[147.04]K[2069.11]HGTYDKLDDDGLIAPGVR.V	YOR151C	1	RPB2	MKHGTYDKLDDDGLIAPGVR	886	1//16	7//75	1.124	0.576923	R.AGDIQLQYGWK[2623.35]VER.H	YDL140C	1	RPB1	AGDIQLQYGWKVER	431	701938	592065	767123	574420	1.33547	0.417353	0.225353
	57	RPB1:431---RPB2:1102	7.96575	1.15989	-1.15989
						0	2.22025	JL102921_110821_RPB4_C1_100B.14652.14652.4	NP	7.96575	0.205123	0.565	1//16	15//75	6.0405	1.60714	R.AGDIQLQYGWK[1643.86]VER.H	YDL140C	1	RPB1	AGDIQLQYGWKVER	431	1//12	12//47	1.92525	1.25	R.HM[147.04]VDDK[2069.11]IHAR.A	YOR151C	1	RPB2	HMVDDKIHAR	1102	558421	256912	612881	220718	2.77676	1.4734	1.2814
						-2	6.26352	JL102921_110821_RPB4_C1_70B.12314.12314.4	N	6.592	0.16493		//16	16//75	5.06775	1.65385	R.AGDIQLQYGWK[1643.88]VER.H	YDL140C	1	RPB1	AGDIQLQYGWKVER	431	1//12	11//47	1.52425	1.44444	R.HM[147.04]VDDK[2069.13]IHAR.A	YOR151C	1	RPB2	HMVDDKIHAR	1102	968493	633264	1.06066e+06	589915	1.79799	0.846388	0.654388
4	RPB1---RPB3
	1	RPB1:15---RPB3:15	8.02625	0.191913	-0.191913
						0	16.1325	JL102921_110821_RPB4_C1_70B.23143.23143.5	N	8.02625	0.241904		//13	19//199	2.43475	0.729167	K.IREASK[2271.15]DNVDFILSNVDLAM[147.04]ANSLR.R	YIL021W	1	RPB3	IREASKDNVDFILSNVDLAMANSLR	15	//18	14//117	5.5915	1.06667	R.TVK[3213.61]EVQFGLFSPEEVR.A	YDL140C	1	RPB1	TVKEVQFGLFSPEEVR	15	127594	123473	139250	121906	1.14228	0.191913	-8.66e-05
	2	RPB1:1003---RPB3:149	5.808	-0.345714	0.345714
						0	15.4503	JL102921_110821_RPB4_C1.06206.06206.4	P	5.808	0.224785	0.203	//11	12//58	5.4495	1.68182	R.GK[1108.67]NEIIQNAQR.D	YDL140C	1	RPB1	GKNEIIQNAQR	1003	1//7	4//30	0.3585	0.5	R.K[1676.94]GQELK.L	YIL021W	1	RPB3	KGQELK	149	324551	439213	352679	448177	0.786919	-0.345714	-0.537714
5	RPB1---RPB5
	1	RPB1:941---RPB5:171	4.5265	1.00279	-1.00279
						0	0.264327	JL102921_110821_RPB4_C1_100B.11574.11574.5	P	4.5265	0.182358	0.733	//12	12//65	3.969	1.65	R.YRLK[969.62]ESQLPR.I	YBR154C	1	RPB5	YRLKESQLPR	171	//5	3//26	0.5575	0.625	R.K[1695.99]FLR.E	YDL140C	2	RPB1	KFLR	941	359897	215026	394395	196817	2.00387	1.00279	0.810787
	2	RPB1:941---RPB5:201	2.07975	0.322308	-0.322308
						1	-43.7589	JL102921_110821_RPB4_C1_30B.02494.02494.4	P	2.07975	0.101856	0.00461	//8	6//33	1.52925	1	R.K[969.62]SETSGR.Y	YBR154C	1	RPB5	KSETSGR	201	1//5	5//20	0.5505	1.25	R.K[1170.64]FLR.E	YDL140C	2	RPB1	KFLR	941	1.25378e+06	1.1203e+06	1.36945e+06	1.09527e+06	1.25033	0.322308	0.130308
	3	RPB1:1003---RPB5:171	8.7705	0.488088	-0.488088
						0	8.7737	JL102921_110821_RPB4_C1_30B.08074.08074.4	NP	8.7705	0.318597	0.00442	//11	17//56	7.48075	2.27273	R.GK[1376.82]NEIIQNAQR.D	YDL140C	1	RPB1	GKNEIIQNAQR	1003	//8	8//34	1.28975	1	R.LK[1676.94]ESQLPR.I	YBR154C	1	RPB5	LKESQLPR	171	532070	392716	582162	373539	1.5585	0.640162	0.448162
						0	2.81701	JL102921_110821_RPB4_C1.07419.07419.3	NP	5.62075	0.226762	0.0108	//11	11//44	2.43475	1.22727	R.GK[1376.82]NEIIQNAQR.D	YDL140C	1	RPB1	GKNEIIQNAQR	1003	//8	10//26	3.186	1.75	R.LK[1676.94]ESQLPR.I	YBR154C	1	RPB5	LKESQLPR	171	215191	174849	235256	168750	1.3941	0.479339	0.287339
						-2	1.54384	JL102921_110821_RPB4_C1.07435.07435.3	N	4.5105	0.167792		//11	11//44	3.037	1.65	R.GK[1376.82]NEIIQNAQR.D	YDL140C	1	RPB1	GKNEIIQNAQR	1003	//8	8//26	1.4735	1.07143	R.LK[1676.94]ESQLPR.I	YBR154C	1	RPB5	LKESQLPR	171	224001	197437	244699	192686	1.26994	0.344762	0.152762
	4	RPB1:1003---RPB5:197	9.21675	1.40717	-1.40717
						0	4.3123	JL102921_110821_RPB4_C1_30B.08590.08590.4	NP	9.21675	0.29247	0.278	//11	22//55	7.739	3.31818	R.GK[1475.94]NEIIQNAQR.D	YDL140C	1	RPB1	GKNEIIQNAQR	1003	//11	10//39	1.47775	1.05556	K.RGEVVK[1676.94]IIR.K	YBR154C	1	RPB5	RGEVVKIIR	197	1.89742e+06	846269	2.08279e+06	720531	2.89064	1.53139	1.33939
						-1	2.44606	JL102921_110821_RPB4_C1_70B.09439.09439.6	N	8.68275	0.325294		//11	15//55	6.73775	2.25	R.GK[1475.94]NEIIQNAQR.D	YDL140C	1	RPB1	GKNEIIQNAQR	1003	//11	8//39	1.945	1.3125	K.RGEVVK[1676.95]IIR.K	YBR154C	1	RPB5	RGEVVKIIR	197	594171	313724	651627	279390	2.33232	1.22176	1.02976
						-1	4.88613	JL102921_110821_RPB4_C1_50B.09308.09308.4	N	8.414	0.256235		//11	20//55	7.433	3.1	R.GK[1475.93]NEIIQNAQR.D	YDL140C	1	RPB1	GKNEIIQNAQR	1003	//11	9//39	0.981	1	K.RGEVVK[1676.93]IIR.K	YBR154C	1	RPB5	RGEVVKIIR	197	1.26292e+06	632941	1.38546e+06	556459	2.48977	1.31601	1.12401
						0	1.89245	JL102921_110821_RPB4_C1_70B.09377.09377.6	N	7.78775	0.263393		//11	14//55	6.30425	2.05	R.GK[1475.94]NEIIQNAQR.D	YDL140C	1	RPB1	GKNEIIQNAQR	1003	//11	7//39	1.4835	1.0625	K.RGEVVK[1676.94]IIR.K	YBR154C	1	RPB5	RGEVVKIIR	197	878276	358535	964484	296899	3.24853	1.69979	1.50779
						0	4.69992	JL102921_110821_RPB4_C1_30B.09564.09564.4	P	7.7715	0.284191	0.593	//11	18//57	7.1815	2.45455	R.GK[1319.84]NEIIQNAQR.D	YDL140C	1	RPB1	GKNEIIQNAQR	1003	//10	6//33	0.59	0.6875	R.GEVVK[1676.94]IIR.K	YBR154C	1	RPB5	GEVVKIIR	197	1.56653e+06	954775	1.71647e+06	877464	1.95617	0.968029	0.776029
						0	3.09977	JL102921_110821_RPB4_C1.08015.08015.4	NP	7.6525	0.214858	0.176	//11	21//55	6.22025	2.86364	R.GK[1475.94]NEIIQNAQR.D	YDL140C	1	RPB1	GKNEIIQNAQR	1003	//11	11//39	1.43225	1.27778	K.RGEVVK[1676.94]IIR.K	YBR154C	1	RPB5	RGEVVKIIR	197	2.35706e+06	1.22316e+06	2.58525e+06	1.08475e+06	2.38327	1.25295	1.06095
						0	0.69007	JL102921_110821_RPB4_C1_50B.09378.09378.4	N	7.5965	0.252149		//11	20//55	6.4575	3.05	R.GK[1475.94]NEIIQNAQR.D	YDL140C	1	RPB1	GKNEIIQNAQR	1003	//11	11//39	1.139	1.3125	K.RGEVVK[1676.94]IIR.K	YBR154C	1	RPB5	RGEVVKIIR	197	1.77049e+06	825843	1.94302e+06	712262	2.72795	1.44782	1.25582
						0	3.48821	JL102921_110821_RPB4_C1_100B.11753.11753.4	N	7.514	0.244784		//11	20//55	6.3705	3.1	R.GK[1475.95]NEIIQNAQR.D	YDL140C	1	RPB1	GKNEIIQNAQR	1003	//11	9//39	1.1435	1	K.RGEVVK[1676.95]IIR.K	YBR154C	1	RPB5	RGEVVKIIR	197	1.33063e+06	588306	1.46069e+06	499593	2.92377	1.54783	1.35583
						-1	1.69562	JL102921_110821_RPB4_C1_30B.08681.08681.5	P	7.149	0.269657	0.157	//11	17//67	6.543	2.27273	R.GK[1475.94]NEIIQNAQR.D	YDL140C	1	RPB1	GKNEIIQNAQR	1003	//11	6//48	0.606	0.722222	K.RGEVVK[1676.94]IIR.K	YBR154C	1	RPB5	RGEVVKIIR	197	3.42544e+06	1.20721e+06	3.76399e+06	947044	3.97446	1.99076	1.79876
						-1	-64.6438	JL102921_110821_RPB4_C1.08070.08070.5	P	6.8915	0.249927	0.202	//11	17//67	6.11375	2.27273	R.GK[1475.94]NEIIQNAQR.D	YDL140C	1	RPB1	GKNEIIQNAQR	1003	//11	7//48	0.77775	0.777778	K.RGEVVK[1676.94]IIR.K	YBR154C	1	RPB5	RGEVVKIIR	197	2.75889e+06	2.01939e+06	3.01884e+06	1.9182e+06	1.57379	0.65424	0.46224
						-1	5.6476	JL102921_110821_RPB4_C1.09569.09569.3	P	4.416	0.141561	0.652	//11	13//45	3.049	1.72727	R.GK[1319.84]NEIIQNAQR.D	YDL140C	1	RPB1	GKNEIIQNAQR	1003	//10	6//25	1.367	0.8125	R.GEVVK[1676.94]IIR.K	YBR154C	1	RPB5	GEVVKIIR	197	425697	196433	467207	168902	2.76614	1.46787	1.27587
						-1	2.30004	JL102921_110821_RPB4_C1.09571.09571.3	P	3.584	0.119552	0.546	//11	12//45	2.98925	1.68182	R.GK[1319.84]NEIIQNAQR.D	YDL140C	1	RPB1	GKNEIIQNAQR	1003	//10	5//25	0.59475	0.4375	R.GEVVK[1676.94]IIR.K	YBR154C	1	RPB5	GEVVKIIR	197	432280	199479	474432	171523	2.76599	1.46779	1.27579
						0	4.20079	JL102921_110821_RPB4_C1_30B.08652.08652.3	P	3.0525	0.118383	0.159	//11	9//43	1.985	1.31818	R.GK[1475.94]NEIIQNAQR.D	YDL140C	1	RPB1	GKNEIIQNAQR	1003	//11	7//30	1.0675	0.777778	K.RGEVVK[1676.94]IIR.K	YBR154C	1	RPB5	RGEVVKIIR	197	880558	419115	966264	363492	2.65828	1.4105	1.2185
						0	2.87167	JL102921_110821_RPB4_C1.08029.08029.3	P	2.96925	0.0906614	0.0914	//11	7//43	1.8035	1.09091	R.GK[1475.94]NEIIQNAQR.D	YDL140C	1	RPB1	GKNEIIQNAQR	1003	//11	8//30	1.16575	0.944444	K.RGEVVK[1676.94]IIR.K	YBR154C	1	RPB5	RGEVVKIIR	197	407726	157699	447853	128180	3.49393	1.80485	1.61285
						-1	2.9183	JL102921_110821_RPB4_C1.08020.08020.3	P	2.76875	0.0811724	0.525	//11	8//43	1.752	1.13636	R.GK[1475.94]NEIIQNAQR.D	YDL140C	1	RPB1	GKNEIIQNAQR	1003	//11	8//30	1.01675	0.833333	K.RGEVVK[1676.94]IIR.K	YBR154C	1	RPB5	RGEVVKIIR	197	293924	146507	322452	128624	2.50694	1.32593	1.13393
	5	RPB1:1350---RPB5:201	18.045	-0.103865	0.103865
						0	2.3916	JL102921_110821_RPB4_C1_D.24542.24542.4	NP	18.045	0.539543	1.14e-06	1//17	37//129	16.7583	2.97619	R.AALYK[1170.64]EVYNVIASDGSYVNYR.H	YDL140C	1	RPB1	AALYKEVYNVIASDGSYVNYR	1350	//8	5//30	1.28675	0.928571	R.K[2801.45]SETSGR.Y	YBR154C	1	RPB5	KSETSGR	201	550585	699071	598862	709515	0.844043	-0.244611	-0.436611
						0	-0.0237149	JL102921_110821_RPB4_C1_70B.21213.21213.4	NP	17.463	0.521097	0.000265	1//17	35//129	16.0685	2.66667	R.AALYK[1170.64]EVYNVIASDGSYVNYR.H	YDL140C	1	RPB1	AALYKEVYNVIASDGSYVNYR	1350	//8	7//30	1.3945	1.07143	R.K[2801.45]SETSGR.Y	YBR154C	1	RPB5	KSETSGR	201	566169	597585	617287	595775	1.03611	0.0511755	-0.140825
						0	3.74133	JL102921_110821_RPB4_C1_100B.23849.23849.4	NP	16.4145	0.482836	4.2e-06	//17	31//129	14.9935	2.40476	R.AALYK[1170.64]EVYNVIASDGSYVNYR.H	YDL140C	1	RPB1	AALYKEVYNVIASDGSYVNYR	1350	//8	7//30	1.421	1.5	R.K[2801.45]SETSGR.Y	YBR154C	1	RPB5	KSETSGR	201	725389	832444	790071	837038	0.943889	-0.0833113	-0.275311
						0	2.52981	JL102921_110821_RPB4_C1_D.24605.24605.5	NP	15.2737	0.456076	0.000106	1//17	33//170	14.3398	2.54762	R.AALYK[1170.64]EVYNVIASDGSYVNYR.H	YDL140C	1	RPB1	AALYKEVYNVIASDGSYVNYR	1350	//8	7//38	0.934	1.5	R.K[2801.45]SETSGR.Y	YBR154C	1	RPB5	KSETSGR	201	395975	469753	431097	473848	0.90978	-0.13641	-0.32841
						0	-0.663062	JL102921_110821_RPB4_C1_50B.22037.22037.4	NP	15.1288	0.434403	0.00553	1//17	32//129	14.0348	2.35714	R.AALYK[1170.64]EVYNVIASDGSYVNYR.H	YDL140C	1	RPB1	AALYKEVYNVIASDGSYVNYR	1350	//8	7//30	1.094	1.07143	R.K[2801.45]SETSGR.Y	YBR154C	1	RPB5	KSETSGR	201	713031	762850	777284	761631	1.02055	0.0293483	-0.162652
						0	-0.712476	JL102921_110821_RPB4_C1.20120.20120.3	NP	15.1028	0.380786	0.0271	//17	29//88	11.6973	2	R.AALYK[1170.64]EVYNVIASDGSYVNYR.H	YDL140C	1	RPB1	AALYKEVYNVIASDGSYVNYR	1350	//8	8//22	3.4055	1.71429	R.K[2801.45]SETSGR.Y	YBR154C	1	RPB5	KSETSGR	201	1.22258e+06	1.33934e+06	1.33237e+06	1.34049e+06	0.993945	-0.00876145	-0.200761
						0	4.73587	JL102921_110821_RPB4_C1.20103.20103.4	NP	14.8183	0.506832	0.58	1//17	28//129	13.8087	2.14286	R.AALYK[1170.64]EVYNVIASDGSYVNYR.H	YDL140C	1	RPB1	AALYKEVYNVIASDGSYVNYR	1350	//8	5//30	1.0095	0.714286	R.K[2801.45]SETSGR.Y	YBR154C	1	RPB5	KSETSGR	201	519170	624011	565120	630219	0.896704	-0.157297	-0.349297
						0	6.43693	JL102921_110821_RPB4_C1_50B.22059.22059.5	P	14.0935	0.449604	0.174	1//17	30//170	13.689	2.2381	R.AALYK[1170.64]EVYNVIASDGSYVNYR.H	YDL140C	1	RPB1	AALYKEVYNVIASDGSYVNYR	1350	//8	5//38	0.4045	0.5	R.K[2801.45]SETSGR.Y	YBR154C	1	RPB5	KSETSGR	201	260797	271396	284391	270162	1.05267	0.0740489	-0.117951
						0	8.0353	JL102921_110821_RPB4_C1_70B.21220.21220.5	P	14.0258	0.450952	0.00242	//17	29//170	13.4025	2.2381	R.AALYK[1170.64]EVYNVIASDGSYVNYR.H	YDL140C	1	RPB1	AALYKEVYNVIASDGSYVNYR	1350	//8	6//38	0.62325	0.928571	R.K[2801.45]SETSGR.Y	YBR154C	1	RPB5	KSETSGR	201	221437	256584	241152	258242	0.933823	-0.0987792	-0.290779
						-1	4.67872	JL102921_110821_RPB4_C1_D.24599.24599.5	NP	13.7152	0.408618	0.00598	1//17	34//170	12.791	2.40476	R.AALYK[1170.64]EVYNVIASDGSYVNYR.H	YDL140C	1	RPB1	AALYKEVYNVIASDGSYVNYR	1350	//8	7//38	0.92425	1.5	R.K[2801.45]SETSGR.Y	YBR154C	1	RPB5	KSETSGR	201	357570	445048	389031	450905	0.86278	-0.212936	-0.404936
						0	-0.236831	JL102921_110821_RPB4_C1_30B.20290.20290.4	NP	13.0887	0.393878	0.0751	1//17	29//129	11.8198	2.04762	R.AALYK[1170.64]EVYNVIASDGSYVNYR.H	YDL140C	1	RPB1	AALYKEVYNVIASDGSYVNYR	1350	//8	4//30	1.269	0.857143	R.K[2801.45]SETSGR.Y	YBR154C	1	RPB5	KSETSGR	201	551276	650946	600210	656332	0.914491	-0.128959	-0.320959
						-1	1.39319	JL102921_110821_RPB4_C1_D.24672.24672.5	P	12.9712	0.361881	0.0144	1//17	27//170	12.3035	1.95238	R.AALYK[1170.64]EVYNVIASDGSYVNYR.H	YDL140C	1	RPB1	AALYKEVYNVIASDGSYVNYR	1350	//8	5//38	0.66775	0.928571	R.K[2801.45]SETSGR.Y	YBR154C	1	RPB5	KSETSGR	201	228760	321904	248437	329498	0.753987	-0.407389	-0.599389
						-2	4.0749	JL102921_110821_RPB4_C1_30B.20310.20310.5	NP	12.8755	0.392462	3.07e-06	//17	25//170	11.8765	1.80952	R.AALYK[1170.64]EVYNVIASDGSYVNYR.H	YDL140C	1	RPB1	AALYKEVYNVIASDGSYVNYR	1350	//8	8//38	0.999	1.57143	R.K[2801.45]SETSGR.Y	YBR154C	1	RPB5	KSETSGR	201	227798	252839	248214	253394	0.979556	-0.0298002	-0.2218
						-1	3.37224	JL102921_110821_RPB4_C1.20093.20093.3	NP	12.7635	0.316284	0.0886	//17	27//88	10.2965	1.7619	R.AALYK[1170.64]EVYNVIASDGSYVNYR.H	YDL140C	1	RPB1	AALYKEVYNVIASDGSYVNYR	1350	//8	6//22	2.467	1.21429	R.K[2801.45]SETSGR.Y	YBR154C	1	RPB5	KSETSGR	201	539881	587097	588415	587157	1.00214	0.00308941	-0.188911
						-1	10.0638	JL102921_110821_RPB4_C1.20085.20085.4	NP	12.6115	0.409597	0.31	1//17	26//129	11.3008	1.83333	R.AALYK[1170.64]EVYNVIASDGSYVNYR.H	YDL140C	1	RPB1	AALYKEVYNVIASDGSYVNYR	1350	//8	5//30	1.31075	0.928571	R.K[2801.45]SETSGR.Y	YBR154C	1	RPB5	KSETSGR	201	326226	429962	354639	437781	0.810084	-0.303857	-0.495857
						0	3.86178	JL102921_110821_RPB4_C1_30B.20307.20307.5	P	12.272	0.350739	9.64e-06	//17	28//170	11.579	1.88095	R.AALYK[1170.64]EVYNVIASDGSYVNYR.H	YDL140C	1	RPB1	AALYKEVYNVIASDGSYVNYR	1350	//8	6//38	0.693	1	R.K[2801.45]SETSGR.Y	YBR154C	1	RPB5	KSETSGR	201	197875	212263	215699	211983	1.01753	0.0250691	-0.166931
						-2	5.57417	JL102921_110821_RPB4_C1.20088.20088.3	N	11.9765	0.30816		//17	26//88	9.4075	1.675	R.AALYK[1170.66]EVYNVIASDGSYVNYR.H	YDL140C	1	RPB1	AALYKEVYNVIASDGSYVNYR	1350	//8	7//22	2.569	1.42857	R.K[2801.47]SETSGR.Y	YBR154C	1	RPB5	KSETSGR	201	458369	489919	499679	489087	1.02166	0.0309125	-0.161088
						0	0.309853	JL102921_110821_RPB4_C1.20114.20114.5	P	11.803	0.328066	0.0065	1//17	29//170	10.9913	1.88095	R.AALYK[1170.64]EVYNVIASDGSYVNYR.H	YDL140C	1	RPB1	AALYKEVYNVIASDGSYVNYR	1350	//8	7//38	0.81175	1.28571	R.K[2801.45]SETSGR.Y	YBR154C	1	RPB5	KSETSGR	201	1.01408e+06	1.18941e+06	1.1042e+06	1.19849e+06	0.921325	-0.118217	-0.310217
						0	5.72654	JL102921_110821_RPB4_C1.20117.20117.5	P	11.5145	0.331376	0.0458	1//17	28//170	10.701	1.85714	R.AALYK[1170.64]EVYNVIASDGSYVNYR.H	YDL140C	1	RPB1	AALYKEVYNVIASDGSYVNYR	1350	//8	7//38	0.8135	1.28571	R.K[2801.45]SETSGR.Y	YBR154C	1	RPB5	KSETSGR	201	1.01583e+06	1.19731e+06	1.10603e+06	1.20701e+06	0.916334	-0.126055	-0.318055
						0	2.48426	JL102921_110821_RPB4_C1_30B.20300.20300.3	NP	9.78425	0.281744	0.674	//17	23//88	8.54675	1.52381	R.AALYK[1170.64]EVYNVIASDGSYVNYR.H	YDL140C	1	RPB1	AALYKEVYNVIASDGSYVNYR	1350	//8	5//22	1.2375	0.928571	R.K[2801.45]SETSGR.Y	YBR154C	1	RPB5	KSETSGR	201	346551	378857	377682	379102	0.996253	-0.00541549	-0.197415
						0	1.73835	JL102921_110821_RPB4_C1_30B.20465.20465.3	NP	9.67125	0.317121	0.433	//17	21//88	7.8805	1.2381	R.AALYK[1170.64]EVYNVIASDGSYVNYR.H	YDL140C	1	RPB1	AALYKEVYNVIASDGSYVNYR	1350	//8	6//22	1.79075	1.21429	R.K[2801.45]SETSGR.Y	YBR154C	1	RPB5	KSETSGR	201	318614	441385	346104	451241	0.767003	-0.382695	-0.574695
						0	5.37521	JL102921_110821_RPB4_C1_30B.20282.20282.4	NP	9.59525	0.294993	0.00301	//17	27//129	8.2595	1.61905	R.AALYK[1170.64]EVYNVIASDGSYVNYR.H	YDL140C	1	RPB1	AALYKEVYNVIASDGSYVNYR	1350	//8	5//30	1.33575	0.928571	R.K[2801.45]SETSGR.Y	YBR154C	1	RPB5	KSETSGR	201	463459	562028	504418	568085	0.887927	-0.171487	-0.363487
						-2	10.3796	JL102921_110821_RPB4_C1_30B.20481.20481.5	P	7.52975	0.249867	0.0121	//17	20//170	7.18675	1.21429	R.AALYK[1170.64]EVYNVIASDGSYVNYR.H	YDL140C	1	RPB1	AALYKEVYNVIASDGSYVNYR	1350	//8	5//38	0.343	0.5	R.K[2801.45]SETSGR.Y	YBR154C	1	RPB5	KSETSGR	201	111022	166069	120452	170773	0.705334	-0.503622	-0.695622
						0	5.47861	JL102921_110821_RPB4_C1_D.24543.24543.3	N	7.4045	0.286968		1//17	19//88	5.5525	1.125	R.AALYK[1170.66]EVYNVIASDGSYVNYR.H	YDL140C	1	RPB1	AALYKEVYNVIASDGSYVNYR	1350	//8	6//22	1.852	1.42857	R.K[2801.47]SETSGR.Y	YBR154C	1	RPB5	KSETSGR	201	472614	441300	515984	433834	1.18936	0.250182	0.0581822
						0	1.76729	JL102921_110821_RPB4_C1_100B.23850.23850.3	N	6.7105	0.197026		1//17	23//88	5.71825	1.45	R.AALYK[1170.64]EVYNVIASDGSYVNYR.H	YDL140C	1	RPB1	AALYKEVYNVIASDGSYVNYR	1350	//8	5//22	0.99225	0.642857	R.K[2801.44]SETSGR.Y	YBR154C	1	RPB5	KSETSGR	201	355997	373901	388162	372572	1.04184	0.0591402	-0.13286
	6	RPB1:129---RPB5:171	6.1525	-0.997537	0.997537
						0	1.86086	JL102921_110821_RPB4_C1_D.14479.14479.4	NP	6.1525	0.246845	0.000264	//12	6//46	0.99175	0.722222	R.Q[111.03]ALAIK[1376.82]DSK.K	YDL140C	1	RPB1	QALAIKDSK	129	//8	13//37	5.16075	2.125	R.LK[1362.8]ESQLPR.I	YBR154C	1	RPB5	LKESQLPR	171	356350	437878	387773	443129	0.87508	-0.192514	-0.384514
						0	2.87373	JL102921_110821_RPB4_C1_70B.11787.11787.4	N	6.064	0.25117		//8	13//37	4.8755	2.42857	R.LK[1362.8]ESQLPR.I	YBR154C	1	RPB5	LKESQLPR	171	//10	8//38	1.1885	1.28571	R.Q[111.03]ALAIK[1376.83]DSK.K	YDL140C	1	RPB1	QALAIKDSK	129	800918	867989	872956	867770	1.00598	0.00859669	-0.183403
						-1	3.34343	JL102921_110821_RPB4_C1_50B.08566.08566.4	N	6.03	0.18231		1//11	14//43	2.69875	2	R.QALAIK[1376.83]DSK.K	YDL140C	1	RPB1	QALAIKDSK	129	//8	8//37	3.33125	1.57143	R.LK[1379.83]ESQLPR.I	YBR154C	1	RPB5	LKESQLPR	171	744809	1.48079e+06	803612	1.5503e+06	0.51836	-0.947974	-1.13997
						0	1.39815	JL102921_110821_RPB4_C1.08382.08382.4	P	5.87675	0.141535	0.708	3//12	12//48	2.416	1.25	R.YRLK[1379.82]ESQLPR.I	YBR154C	1	RPB5	YRLKESQLPR	171	2//11	11//38	3.46075	1.44444	R.QALAIK[1695.99]DSK.K	YDL140C	1	RPB1	QALAIKDSK	129	1673572	2.56631e+06	1.81495e+06	2.64373e+06	0.686512	-0.542643	-0.734643
						-1	2.94005	JL102921_110821_RPB4_C1_50B.08613.08613.3	N	5.86625	0.203541		//11	13//34	4.69875	2.125	R.QALAIK[1376.82]DSK.K	YDL140C	1	RPB1	QALAIKDSK	129	//8	6//29	1.1675	1	R.LK[1379.81]ESQLPR.I	YBR154C	1	RPB5	LKESQLPR	171	524787	1.17359e+06	564636	1.23604e+06	0.45681	-1.13033	-1.32233
						0	2.65222	JL102921_110821_RPB4_C1_50B.11881.11881.4	N	5.86375	0.193338		//8	14//37	4.64075	2.71429	R.LK[1362.8]ESQLPR.I	YBR154C	1	RPB5	LKESQLPR	171	//10	9//38	1.223	1.5	R.Q[111.03]ALAIK[1376.83]DSK.K	YDL140C	1	RPB1	QALAIKDSK	129	2220606	3.13526e+06	2.41148e+06	3.21006e+06	0.751226	-0.412682	-0.604682
						-1	2.51844	JL102921_110821_RPB4_C1_30B.10941.10941.5	N	5.8215	0.206572		//12	9//59	2.3995	1.33333	R.YRLK[1362.8]ESQLPR.I	YBR154C	1	RPB5	YRLKESQLPR	171	//10	11//41	3.422	2	R.Q[111.03]ALAIK[1695.99]DSK.K	YDL140C	1	RPB1	QALAIKDSK	129	756049	1.48961e+06	815903	1.55877e+06	0.523429	-0.933934	-1.12593
						0	6.21415	JL102921_110821_RPB4_C1.10617.10617.3	NP	5.7465	0.172785	0.0726	//12	12//36	3.7715	1.77778	R.Q[111.03]ALAIK[1376.82]DSK.K	YDL140C	1	RPB1	QALAIKDSK	129	//8	8//29	1.975	1.3125	R.LK[1362.8]ESQLPR.I	YBR154C	1	RPB5	LKESQLPR	171	632958	1.79099e+06	676456	1.90517e+06	0.355062	-1.49386	-1.68586
						0	0.215138	JL102921_110821_RPB4_C1_50B.08601.08601.3	N	5.73975	0.190256		//11	12//34	4.52725	1.875	R.QALAIK[1376.82]DSK.K	YDL140C	1	RPB1	QALAIKDSK	129	//8	7//29	1.2125	1.07143	R.LK[1379.82]ESQLPR.I	YBR154C	1	RPB5	LKESQLPR	171	484527	1.098e+06	521143	1.15715e+06	0.450367	-1.15083	-1.34283
						-1	4.19281	JL102921_110821_RPB4_C1.10604.10604.3	NP	5.61725	0.175377	0.611	//12	12//36	3.354	1.77778	R.Q[111.03]ALAIK[1376.82]DSK.K	YDL140C	1	RPB1	QALAIKDSK	129	1//8	9//29	2.26325	1.5625	R.LK[1362.8]ESQLPR.I	YBR154C	1	RPB5	LKESQLPR	171	506172	1.46406e+06	540570	1.55866e+06	0.346816	-1.52776	-1.71976
						0	4.30357	JL102921_110821_RPB4_C1_30B.10501.10501.3	NP	5.53275	0.19831	0.0368	1//12	13//36	3.89075	1.66667	R.Q[111.03]ALAIK[1376.82]DSK.K	YDL140C	1	RPB1	QALAIKDSK	129	//8	8//29	1.642	1.5	R.LK[1362.8]ESQLPR.I	YBR154C	1	RPB5	LKESQLPR	171	1.06915e+06	2118273	1.15365e+06	2.21728e+06	0.520299	-0.942587	-1.13459
						0	3.64324	JL102921_110821_RPB4_C1.07652.07652.3	NP	5.35575	0.154076	0.233	2//11	14//34	4.045	1.77778	R.QALAIK[1376.82]DSK.K	YDL140C	1	RPB1	QALAIKDSK	129	//8	7//29	1.31075	0.9375	R.LK[1379.82]ESQLPR.I	YBR154C	1	RPB5	LKESQLPR	171	737422	2.051e+06	788531	2.18034e+06	0.361654	-1.46732	-1.65932
						0	1.21925	JL102921_110821_RPB4_C1.07648.07648.4	P	4.9445	0.166048	0.368	//11	11//43	1.547	1.16667	R.QALAIK[1376.82]DSK.K	YDL140C	1	RPB1	QALAIKDSK	129	//8	7//37	3.3975	1.3125	R.LK[1379.82]ESQLPR.I	YBR154C	1	RPB5	LKESQLPR	171	998110	2.83774e+06	1.06654e+06	3.01919e+06	0.353252	-1.50123	-1.69323
						0	2.30389	JL102921_110821_RPB4_C1_30B.10491.10491.4	NP	4.84775	0.175019	0.00628	//12	8//46	1.20275	0.833333	R.Q[111.03]ALAIK[1376.82]DSK.K	YDL140C	1	RPB1	QALAIKDSK	129	//8	11//37	3.645	1.875	R.LK[1362.8]ESQLPR.I	YBR154C	1	RPB5	LKESQLPR	171	1503157	2.20541e+06	1.63135e+06	2.26465e+06	0.720355	-0.47322	-0.66522
						0	1.47607	JL102921_110821_RPB4_C1.11150.11150.4	P	4.55975	0.145493	0.241	//12	9//48	1.2365	0.85	R.YRLK[1362.8]ESQLPR.I	YBR154C	1	RPB5	YRLKESQLPR	171	1//12	12//41	3.32325	1.61111	R.Q[111.03]ALAIK[1695.99]DSK.K	YDL140C	1	RPB1	QALAIKDSK	129	1.14476e+06	2.90732e+06	1.22747e+06	3.07948e+06	0.398594	-1.32701	-1.51901
						0	4.55278	JL102921_110821_RPB4_C1.10596.10596.3	P	4.40475	0.142263	0.0744	//12	11//36	3.012	1.55556	R.Q[111.03]ALAIK[1376.82]DSK.K	YDL140C	1	RPB1	QALAIKDSK	129	//8	7//29	1.39275	1.125	R.LK[1362.8]ESQLPR.I	YBR154C	1	RPB5	LKESQLPR	171	474455	1.25797e+06	508088	1.33481e+06	0.380644	-1.39349	-1.58549
						0	2.06183	JL102921_110821_RPB4_C1.11153.11153.3	NP	4.302	0.166412	0.352	//12	9//37	2.1855	1.15	R.YRLK[1362.8]ESQLPR.I	YBR154C	1	RPB5	YRLKESQLPR	171	1//12	7//31	2.1165	1	R.Q[111.03]ALAIK[1695.99]DSK.K	YDL140C	1	RPB1	QALAIKDSK	129	164701	365123	177246	384391	0.461109	-1.11682	-1.30882
						0	-0.797348	JL102921_110821_RPB4_C1.10905.10905.4	NP	4.14	0.158184	0.439	//12	5//46	1.069	0.666667	R.Q[111.03]ALAIK[1376.82]DSK.K	YDL140C	1	RPB1	QALAIKDSK	129	//8	8//37	3.071	1.3125	R.LK[1362.8]ESQLPR.I	YBR154C	1	RPB5	LKESQLPR	171	371486	616119	402303	638114	0.630457	-0.665531	-0.857531
						0	3.01308	JL102921_110821_RPB4_C1.08379.08379.3	P	3.8945	0.111843	0.644	//12	8//37	1.2995	0.85	R.YRLK[1379.82]ESQLPR.I	YBR154C	1	RPB5	YRLKESQLPR	171	//11	11//29	2.595	1.77778	R.QALAIK[1695.99]DSK.K	YDL140C	1	RPB1	QALAIKDSK	129	124437	342074	133111	363483	0.366209	-1.44926	-1.64126
						0	4.18678	JL102921_110821_RPB4_C1.10594.10594.4	P	3.869	0.13824	0.631	//12	6//46	0.97975	0.722222	R.Q[111.03]ALAIK[1376.82]DSK.K	YDL140C	1	RPB1	QALAIKDSK	129	//8	8//37	2.88925	1.3125	R.LK[1362.8]ESQLPR.I	YBR154C	1	RPB5	LKESQLPR	171	616576	1.25084e+06	664951	1.31097e+06	0.507221	-0.979313	-1.17131
						0	4.37317	JL102921_110821_RPB4_C1.07727.07727.5	P	3.33975	0.0992806	0.603	2//11	13//52	0.87625	1.11111	R.QALAIK[1376.82]DSK.K	YDL140C	1	RPB1	QALAIKDSK	129	//8	9//45	2.4635	1.4375	R.LK[1379.82]ESQLPR.I	YBR154C	1	RPB5	LKESQLPR	171	1589200	3982674	1.70466e+06	4.21615e+06	0.404317	-1.30644	-1.49844
						0	2.06183	JL102921_110821_RPB4_C1.11156.11156.3	P	3.03825	0.131038	0.59	//12	7//37	1.09575	0.6	R.YRLK[1362.8]ESQLPR.I	YBR154C	1	RPB5	YRLKESQLPR	171	//12	7//31	1.9425	1.11111	R.Q[111.03]ALAIK[1695.99]DSK.K	YDL140C	1	RPB1	QALAIKDSK	129	195755	402376	211050	422008	0.50011	-0.999684	-1.19168
	7	RPB1:1205---RPB5:171	5.7375	-0.50526	0.50526
						-2	10.4826	JL102921_110821_RPB4_C1_30B.08153.08153.4	NP	5.7375	0.176178	0.1	//18	21//89	3.9035	1.5	R.AAM[147.04]NDK[1376.82]DLTM[147.04]GQVGER.I	YDL140C	1	RPB1	AAMNDKDLTMGQVGER	1205	//8	6//32	1.834	1.25	R.LK[2174.05]ESQLPR.I	YBR154C	1	RPB5	LKESQLPR	171	397670	595462	431438	612375	0.704533	-0.50526	-0.69726
	8	RPB1:1205---RPB5:201	6.5715	0.280781	-0.280781
						-1	0.152045	JL102921_110821_RPB4_C1_50B.05783.05783.4	N	6.5715	0.287272		//18	18//91	5.431	1.5	R.AAM[147.04]NDK[1170.64]DLTM[147.04]GQVGER.I	YDL140C	1	RPB1	AAMNDKDLTMGQVGER	1205	//8	5//30	1.1405	1.14286	R.K[2174.05]SETSGR.Y	YBR154C	1	RPB5	KSETSGR	201	141734	129891	154770	127398	1.21485	0.280781	0.0887808
	9	RPB1:1286---RPB5:197	4.69125	0.608148	-0.608148
						-1	3.63338	JL102921_110821_RPB4_C1_100B.11374.11374.4	N	4.69125	0.153131		//10	10//39	2.53475	1.78571	R.VVM[147.04]M[147.04]K[1319.83]YDR.K	YDL140C	1	RPB1	VVMMKYDR	1286	//10	9//37	2.1565	1.71429	R.GEVVK[1479.76]IIR.K	YBR154C	1	RPB5	GEVVKIIR	197	649686	488736	710740	466272	1.5243	0.608148	0.416148
	10	RPB1:1286---RPB5:171	0.485	-0.63098	0.63098
						0	1.10251	JL102921_110821_RPB4_C1.22166.22166.3	P	0.485	0.0150322	0.666	//10	4//30	0.259	0.375	R.VVM[147.04]M[147.04]K[1376.82]YDR.K	YDL140C	1	RPB1	VVMMKYDR	1286	//8	2//28	0.226	0.125	R.LK[1479.77]ESQLPR.I	YBR154C	1	RPB5	LKESQLPR	171	528665	857657	572754	886976	0.645737	-0.63098	-0.82298
	11	RPB1:15---RPB5:171	14.0932	0.249826	-0.249826
						0	5.86713	JL102921_110821_RPB4_C1_30B.16327.16327.4	NP	14.0932	0.46383	0.002	//18	26//95	13.0518	2.5625	R.TVK[1376.82]EVQFGLFSPEEVR.A	YDL140C	1	RPB1	TVKEVQFGLFSPEEVR	15	1//8	6//32	1.0415	1.0625	R.LK[2271.23]ESQLPR.I	YBR154C	1	RPB5	LKESQLPR	171	1.7561e+06	1.58772e+06	1.91788e+06	1.5546e+06	1.23368	0.302973	0.110973
						0	2.43139	JL102921_110821_RPB4_C1_50B.17983.17983.5	NP	11.9605	0.413051	0.0274	//18	24//121	10.4745	2.25	R.TVK[1376.82]EVQFGLFSPEEVR.A	YDL140C	1	RPB1	TVKEVQFGLFSPEEVR	15	//8	7//40	1.486	1.3125	R.LK[2271.23]ESQLPR.I	YBR154C	1	RPB5	LKESQLPR	171	773652	632809	845738	611318	1.38347	0.468287	0.276287
						0	6.024	JL102921_110821_RPB4_C1.16492.16492.4	NP	11.8277	0.347466	0.0158	//18	23//95	10.5143	2.15625	R.TVK[1376.82]EVQFGLFSPEEVR.A	YDL140C	1	RPB1	TVKEVQFGLFSPEEVR	15	1//8	7//32	1.3135	1.3125	R.LK[2271.23]ESQLPR.I	YBR154C	1	RPB5	LKESQLPR	171	906456	816492	990003	799079	1.23893	0.309095	0.117095
						-2	0.816356	JL102921_110821_RPB4_C1_D.20653.20653.4	N	11.6655	0.351365		//18	25//95	10.7227	2.5	R.TVK[1376.82]EVQFGLFSPEEVR.A	YDL140C	1	RPB1	TVKEVQFGLFSPEEVR	15	//8	6//32	0.94275	1	R.LK[2271.24]ESQLPR.I	YBR154C	1	RPB5	LKESQLPR	171	754459	814041	822362	813463	1.01094	0.0156978	-0.176302
						-1	0.218024	JL102921_110821_RPB4_C1_50B.17993.17993.4	N	10.296	0.300657		//18	23//95	9.16175	2.46667	R.TVK[1376.82]EVQFGLFSPEEVR.A	YDL140C	1	RPB1	TVKEVQFGLFSPEEVR	15	1//8	7//32	1.13425	1.5	R.LK[2271.23]ESQLPR.I	YBR154C	1	RPB5	LKESQLPR	171	1.34681e+06	1.01907e+06	1.47331e+06	973109	1.51402	0.598385	0.406385
						0	3.8451	JL102921_110821_RPB4_C1_70B.17424.17424.4	N	10.2955	0.269192		//18	25//95	9.2365	2.43333	R.TVK[1376.83]EVQFGLFSPEEVR.A	YDL140C	1	RPB1	TVKEVQFGLFSPEEVR	15	1//8	7//32	1.059	1.07143	R.LK[2271.25]ESQLPR.I	YBR154C	1	RPB5	LKESQLPR	171	710576	638691	776086	624900	1.24194	0.31259	0.12059
						0	1.75128	JL102921_110821_RPB4_C1_30B.16303.16303.3	N	10.0795	0.288093		//18	19//69	7.6915	1.63333	R.TVK[1376.83]EVQFGLFSPEEVR.A	YDL140C	1	RPB1	TVKEVQFGLFSPEEVR	15	1//8	9//24	2.388	1.57143	R.LK[2271.24]ESQLPR.I	YBR154C	1	RPB5	LKESQLPR	171	881390	568992	965360	528785	1.82562	0.868386	0.676386
						-1	2.02142	JL102921_110821_RPB4_C1_30B.16374.16374.4	N	9.98225	0.299902		//18	22//95	8.68875	2.1	R.TVK[1376.82]EVQFGLFSPEEVR.A	YDL140C	1	RPB1	TVKEVQFGLFSPEEVR	15	2//8	7//32	1.2935	1.42857	R.LK[2271.23]ESQLPR.I	YBR154C	1	RPB5	LKESQLPR	171	898917	1314987	975627	1.35001e+06	0.722682	-0.468566	-0.660566
						0	1.39641	JL102921_110821_RPB4_C1_100B.19927.19927.4	P	9.45225	0.283133	0.00473	//18	25//95	8.73	2.21875	R.TVK[1376.82]EVQFGLFSPEEVR.A	YDL140C	1	RPB1	TVKEVQFGLFSPEEVR	15	//8	4//32	0.72225	0.5625	R.LK[2271.23]ESQLPR.I	YBR154C	1	RPB5	LKESQLPR	171	773802	672433	845421	655026	1.29067	0.368118	0.176118
						0	3.68824	JL102921_110821_RPB4_C1_50B.17967.17967.4	N	9.3675	0.269069		//18	26//95	8.24925	2.66667	R.TVK[1376.83]EVQFGLFSPEEVR.A	YDL140C	1	RPB1	TVKEVQFGLFSPEEVR	15	1//8	8//32	1.11825	1.57143	R.LK[2271.25]ESQLPR.I	YBR154C	1	RPB5	LKESQLPR	171	1.43243e+06	1.13476e+06	1.56634e+06	1.09116e+06	1.43549	0.521541	0.329541
						0	4.49027	JL102921_110821_RPB4_C1_30B.16343.16343.5	NP	9.33475	0.29774	8.95e-07	//18	23//121	7.80325	1.90625	R.TVK[1376.82]EVQFGLFSPEEVR.A	YDL140C	1	RPB1	TVKEVQFGLFSPEEVR	15	//8	6//40	1.5315	1.25	R.LK[2271.23]ESQLPR.I	YBR154C	1	RPB5	LKESQLPR	171	1.09101e+06	991718	1.19146e+06	971690	1.22617	0.29416	0.10216
						0	1.75128	JL102921_110821_RPB4_C1_30B.16298.16298.3	N	9.10275	0.250117		//18	19//69	7.184	1.63333	R.TVK[1376.83]EVQFGLFSPEEVR.A	YDL140C	1	RPB1	TVKEVQFGLFSPEEVR	15	//8	8//24	1.91875	1.57143	R.LK[2271.24]ESQLPR.I	YBR154C	1	RPB5	LKESQLPR	171	742038	503151	812439	471797	1.72201	0.784095	0.592095
						0	3.50985	JL102921_110821_RPB4_C1_50B.18036.18036.5	NP	8.989	0.312281	0.266	//18	23//121	7.52725	1.6875	R.TVK[1376.82]EVQFGLFSPEEVR.A	YDL140C	1	RPB1	TVKEVQFGLFSPEEVR	15	//8	7//40	1.46175	1.3125	R.LK[2271.23]ESQLPR.I	YBR154C	1	RPB5	LKESQLPR	171	610127	564404	666181	554218	1.20202	0.265461	0.0734612
						0	1.45097	JL102921_110821_RPB4_C1_100B.19938.19938.5	NP	8.057	0.272297	0.000186	//18	21//121	7.03825	1.84375	R.TVK[1376.82]EVQFGLFSPEEVR.A	YDL140C	1	RPB1	TVKEVQFGLFSPEEVR	15	//8	6//40	1.01875	1.0625	R.LK[2271.23]ESQLPR.I	YBR154C	1	RPB5	LKESQLPR	171	458146	544558	498769	549405	0.907835	-0.139497	-0.331497
						-1	3.72554	JL102921_110821_RPB4_C1.16489.16489.5	NP	7.888	0.256037	0.00325	//18	17//121	6.466	1.375	R.TVK[1376.82]EVQFGLFSPEEVR.A	YDL140C	1	RPB1	TVKEVQFGLFSPEEVR	15	//8	7//40	1.422	1.3125	R.LK[2271.23]ESQLPR.I	YBR154C	1	RPB5	LKESQLPR	171	570026	627048	621184	627853	0.989378	-0.0154065	-0.207406
						0	1.45097	JL102921_110821_RPB4_C1.16458.16458.5	NP	6.21975	0.198359	0.00991	//18	14//121	4.84925	1.125	R.TVK[1376.82]EVQFGLFSPEEVR.A	YDL140C	1	RPB1	TVKEVQFGLFSPEEVR	15	//8	7//40	1.3705	1.3125	R.LK[2271.23]ESQLPR.I	YBR154C	1	RPB5	LKESQLPR	171	621035	666175	676977	665295	1.01756	0.0251139	-0.166886
						1247	109.071	JL102921_110821_RPB4_C1_100B.19919.19919.3	P	5.1635	0.164074	0.000828	//18	13//69	4.187	0.96875	R.TVK[1376.82]EVQFGLFSPEEVR.A	YDL140C	1	RPB1	TVKEVQFGLFSPEEVR	15	//8	5//24	0.9765	1	R.LK[2271.23]ESQLPR.I	YBR154C	1	RPB5	LKESQLPR	171	602263	773785	654960	786151	0.833123	-0.263399	-0.455399
6	RPB1---RPB6
	1	RPB1:15---RPB6:76	8.9085	-1.86362	1.86362
						0	2.24381	JL102921_110821_RPB4_C1_30B.15288.15288.4	N	8.9085	0.307556		//18	22//92	7.719	1.9	R.TVK[1788.05]EVQFGLFSPEEVR.A	YDL140C	1	RPB1	TVKEVQFGLFSPEEVR	15	//9	8//44	1.1895	0.875	K.EK[2271.24]AIPK[425.27]DQR.A	YPR187W	1	RPB6	EKAIPKDQR	76	301113	1256865	316885	1.35308e+06	0.234195	-2.09422	-2.28622
						-2	3.13876	JL102921_110821_RPB4_C1_50B.16738.16738.6	N	7.65475	0.274975		//18	14//92	6.3845	1.4	R.TVK[1788.03]EVQFGLFSPEEVR.A	YDL140C	1	RPB1	TVKEVQFGLFSPEEVR	15	1//9	9//44	1.27025	1.1875	K.EK[2271.22]AIPK[425.27]DQR.A	YPR187W	1	RPB6	EKAIPKDQR	76	416283	1.47327e+06	441300	1.57893e+06	0.279492	-1.83912	-2.03112
						0	4.55716	JL102921_110821_RPB4_C1.15348.15348.6	N	5.167	0.203018		//18	12//92	4.173	1.23333	R.TVK[1788.06]EVQFGLFSPEEVR.A	YDL140C	1	RPB1	TVKEVQFGLFSPEEVR	15	//9	5//44	0.994	0.8125	K.EK[2271.25]AIPK[425.27]DQR.A	YPR187W	1	RPB6	EKAIPKDQR	76	292273	919557	311233	981858	0.316984	-1.65752	-1.84952
	2	RPB1:15---RPB6:72	15.256	-1.50458	1.50458
						-1	6.7599	JL102921_110821_RPB4_C1_30B.16662.16662.4	NP	15.256	0.519017	0.236	//18	29//92	14.19	3.0625	R.TVK[1731.08]EVQFGLFSPEEVR.A	YDL140C	1	RPB1	TVKEVQFGLFSPEEVR	15	//11	6//43	1.066	0.722222	K.TLK[425.27]EK[2271.23]AIPK.D	YPR187W	1	RPB6	TLKEKAIPK	72	160863	808269	167625	873827	0.191829	-2.38211	-2.57411
						0	3.94313	JL102921_110821_RPB4_C1_30B.16682.16682.4	NP	14.5687	0.524745	0.227	//18	27//92	13.5	2.90625	R.TVK[1731.08]EVQFGLFSPEEVR.A	YDL140C	1	RPB1	TVKEVQFGLFSPEEVR	15	//11	6//43	1.06875	0.722222	K.TLK[425.27]EK[2271.23]AIPK.D	YPR187W	1	RPB6	TLKEKAIPK	72	173564	786250	181903	848101	0.214483	-2.22107	-2.41307
						-1	-7.38963	JL102921_110821_RPB4_C1_D.19984.19984.4	P	13.441	0.529622	0.155	//18	29//98	12.5905	2.96875	R.TVK[1091.68]EVQFGLFSPEEVR.A	YDL140C	1	RPB1	TVKEVQFGLFSPEEVR	15	1//6	4//23	0.8505	0.75	K.EK[2271.23]AIPK.D	YPR187W	1	RPB6	EKAIPK	72	607841	1.03333e+06	657959	1.07193e+06	0.613809	-0.704139	-0.896139
						0	-2.12269	JL102921_110821_RPB4_C1_100B.19283.19283.4	P	12.373	0.482472	0.375	//18	26//98	11.717	2.6875	R.TVK[1091.68]EVQFGLFSPEEVR.A	YDL140C	1	RPB1	TVKEVQFGLFSPEEVR	15	//6	3//23	0.656	0.666667	K.EK[2271.23]AIPK.D	YPR187W	1	RPB6	EKAIPK	72	416720	833920	449554	873369	0.514736	-0.958097	-1.1501
						-2	1.17191	JL102921_110821_RPB4_C1_30B.16688.16688.4	N	12.2375	0.454495		//18	25//92	11.2668	2.63333	R.TVK[1731.09]EVQFGLFSPEEVR.A	YDL140C	1	RPB1	TVKEVQFGLFSPEEVR	15	1//11	7//43	0.97075	0.875	K.TLK[425.27]EK[2271.24]AIPK.D	YPR187W	1	RPB6	TLKEKAIPK	72	179165	803595	187872	866611	0.216789	-2.20564	-2.39764
						-1	4.87112	JL102921_110821_RPB4_C1_D.19989.19989.4	P	12.223	0.458572	0.114	//18	28//98	11.3808	2.625	R.TVK[1091.68]EVQFGLFSPEEVR.A	YDL140C	1	RPB1	TVKEVQFGLFSPEEVR	15	1//6	4//23	0.84225	0.75	K.EK[2271.23]AIPK.D	YPR187W	1	RPB6	EKAIPK	72	570001	1.04743e+06	616046	1.09174e+06	0.564277	-0.825525	-1.01753
						0	7.63631	JL102921_110821_RPB4_C1_30B.16678.16678.5	NP	11.4785	0.41916	0.0527	//18	27//118	10.4853	2.5625	R.TVK[1731.08]EVQFGLFSPEEVR.A	YDL140C	1	RPB1	TVKEVQFGLFSPEEVR	15	//11	8//54	0.99325	1.16667	K.TLK[425.27]EK[2271.23]AIPK.D	YPR187W	1	RPB6	TLKEKAIPK	72	289808	1611084	300108	1.74522e+06	0.17196	-2.53986	-2.73186
						0	2.44289	JL102921_110821_RPB4_C1_30B.16634.16634.5	NP	10.779	0.424487	0.0283	//18	23//118	9.85725	2.3125	R.TVK[1731.08]EVQFGLFSPEEVR.A	YDL140C	1	RPB1	TVKEVQFGLFSPEEVR	15	//11	7//54	0.92175	0.666667	K.TLK[425.27]EK[2271.23]AIPK.D	YPR187W	1	RPB6	TLKEKAIPK	72	256159	1.03287e+06	270018	1.11096e+06	0.24305	-2.04067	-2.23267
						-1	5.10121	JL102921_110821_RPB4_C1_D.20673.20673.5	P	10.4797	0.377574	0.0138	//18	25//118	10.0853	2.34375	R.TVK[1731.08]EVQFGLFSPEEVR.A	YDL140C	1	RPB1	TVKEVQFGLFSPEEVR	15	//11	4//54	0.3945	0.333333	K.TLK[425.27]EK[2271.23]AIPK.D	YPR187W	1	RPB6	TLKEKAIPK	72	369142	692687	398786	722868	0.551672	-0.858117	-1.05012
						0	-2.29537	JL102921_110821_RPB4_C1_70B.16732.16732.4	P	9.70425	0.346958	0.547	//18	23//98	8.874	2	R.TVK[1091.68]EVQFGLFSPEEVR.A	YDL140C	1	RPB1	TVKEVQFGLFSPEEVR	15	2//6	5//23	0.83025	0.833333	K.EK[2271.23]AIPK.D	YPR187W	1	RPB6	EKAIPK	72	540504	1.06701e+06	583269	1.11666e+06	0.522334	-0.936957	-1.12896
						0	2.44289	JL102921_110821_RPB4_C1.16554.16554.5	NP	9.5725	0.374826	0.722	//18	22//118	8.61575	2.28125	R.TVK[1731.08]EVQFGLFSPEEVR.A	YDL140C	1	RPB1	TVKEVQFGLFSPEEVR	15	//11	7//54	0.95675	0.944444	K.TLK[425.27]EK[2271.23]AIPK.D	YPR187W	1	RPB6	TLKEKAIPK	72	832399	3.12825e+06	880207	3.3584e+06	0.262091	-1.93186	-2.12386
						-1	2.00491	JL102921_110821_RPB4_C1_30B.15827.15827.3	NP	9.507	0.290432	0.0197	//18	19//72	7.64775	1.71875	R.TVK[1091.68]EVQFGLFSPEEVR.A	YDL140C	1	RPB1	TVKEVQFGLFSPEEVR	15	1//6	8//17	1.85925	1.75	K.EK[2271.23]AIPK.D	YPR187W	1	RPB6	EKAIPK	72	333882	1.21232e+06	353574	1.30024e+06	0.271931	-1.87869	-2.07069
						0	6.68433	JL102921_110821_RPB4_C1.16021.16021.4	P	9.447	0.35104	0.0396	//18	20//98	8.98275	2.03125	R.TVK[1091.68]EVQFGLFSPEEVR.A	YDL140C	1	RPB1	TVKEVQFGLFSPEEVR	15	2//6	5//23	0.46425	0.833333	K.EK[2271.23]AIPK.D	YPR187W	1	RPB6	EKAIPK	72	841508	1.72502e+06	907313	1.80892e+06	0.501577	-0.995457	-1.18746
						0	-5.10623	JL102921_110821_RPB4_C1_D.19996.19996.5	P	9.172	0.345539	0.00413	//18	20//124	8.30225	1.8125	R.TVK[1091.68]EVQFGLFSPEEVR.A	YDL140C	1	RPB1	TVKEVQFGLFSPEEVR	15	2//6	6//29	0.86975	1.16667	K.EK[2271.23]AIPK.D	YPR187W	1	RPB6	EKAIPK	72	119412	334777	127656	355997	0.358587	-1.47961	-1.67161
						0	5.46432	JL102921_110821_RPB4_C1_70B.16753.16753.3	N	9.15325	0.292581		//18	19//72	7.30925	1.83333	R.TVK[1091.66]EVQFGLFSPEEVR.A	YDL140C	1	RPB1	TVKEVQFGLFSPEEVR	15	//6	6//17	1.844	1.6	K.EK[2271.22]AIPK.D	YPR187W	1	RPB6	EKAIPK	72	304682	800970	326364	849604	0.384137	-1.38031	-1.57231
						0	0.506088	JL102921_110821_RPB4_C1_30B.15801.15801.5	P	8.96325	0.327227	0.0017	//18	20//124	8.08625	1.8125	R.TVK[1091.68]EVQFGLFSPEEVR.A	YDL140C	1	RPB1	TVKEVQFGLFSPEEVR	15	2//6	6//29	0.877	1.16667	K.EK[2271.23]AIPK.D	YPR187W	1	RPB6	EKAIPK	72	437874	1502301	464764	1.60854e+06	0.288936	-1.79118	-1.98318
						0	2.34088	JL102921_110821_RPB4_C1_70B.16835.16835.5	P	8.4065	0.330081	0.0434	//18	21//124	8.05	1.9375	R.TVK[1091.68]EVQFGLFSPEEVR.A	YDL140C	1	RPB1	TVKEVQFGLFSPEEVR	15	2//6	5//29	0.3565	0.833333	K.EK[2271.23]AIPK.D	YPR187W	1	RPB6	EKAIPK	72	430545	1978497	450891	2.13484e+06	0.211206	-2.24328	-2.43528
						0	1.6436	JL102921_110821_RPB4_C1_50B.17251.17251.3	N	8.33475	0.244963		//18	19//72	6.60775	1.83333	R.TVK[1091.67]EVQFGLFSPEEVR.A	YDL140C	1	RPB1	TVKEVQFGLFSPEEVR	15	//6	6//17	1.727	1.6	K.EK[2271.23]AIPK.D	YPR187W	1	RPB6	EKAIPK	72	314036	956297	334794	1.01995e+06	0.328245	-1.60716	-1.79916
						0	5.25497	JL102921_110821_RPB4_C1_70B.16794.16794.5	P	8.278	0.305034	0.119	//18	20//124	7.90275	1.8125	R.TVK[1091.68]EVQFGLFSPEEVR.A	YDL140C	1	RPB1	TVKEVQFGLFSPEEVR	15	2//6	5//29	0.37525	0.833333	K.EK[2271.23]AIPK.D	YPR187W	1	RPB6	EKAIPK	72	394070	2.09277e+06	409266	2.26503e+06	0.180689	-2.46842	-2.66042
						-1	3.11797	JL102921_110821_RPB4_C1_30B.15685.15685.5	P	8.236	0.315248	0.00124	//18	21//124	7.43175	1.9375	R.TVK[1091.68]EVQFGLFSPEEVR.A	YDL140C	1	RPB1	TVKEVQFGLFSPEEVR	15	2//6	5//29	0.80425	0.833333	K.EK[2271.23]AIPK.D	YPR187W	1	RPB6	EKAIPK	72	421335	1.62345e+06	445047	1.74408e+06	0.255175	-1.97044	-2.16244
						0	2.35028	JL102921_110821_RPB4_C1.15846.15846.3	NP	8.1145	0.233662	0.39	//18	16//72	6.391	1.34375	R.TVK[1091.68]EVQFGLFSPEEVR.A	YDL140C	1	RPB1	TVKEVQFGLFSPEEVR	15	//6	6//17	1.7235	1.33333	K.EK[2271.23]AIPK.D	YPR187W	1	RPB6	EKAIPK	72	444575	2.46899e+06	460405	2.67451e+06	0.172145	-2.5383	-2.7303
						-2	-0.530032	JL102921_110821_RPB4_C1_30B.15690.15690.5	P	8.056	0.315347	0.00702	//18	20//124	7.209	1.71875	R.TVK[1091.68]EVQFGLFSPEEVR.A	YDL140C	1	RPB1	TVKEVQFGLFSPEEVR	15	2//6	6//29	0.847	1.16667	K.EK[2271.23]AIPK.D	YPR187W	1	RPB6	EKAIPK	72	459532	1.76948e+06	485408	1.90093e+06	0.255353	-1.96943	-2.16143
						0	0.829875	JL102921_110821_RPB4_C1_70B.16814.16814.5	P	7.87975	0.295437	0.0317	//18	19//124	7.548	1.59375	R.TVK[1091.68]EVQFGLFSPEEVR.A	YDL140C	1	RPB1	TVKEVQFGLFSPEEVR	15	2//6	4//29	0.33175	0.5	K.EK[2271.23]AIPK.D	YPR187W	1	RPB6	EKAIPK	72	448825	2.3175e+06	466934	2.50686e+06	0.186262	-2.42459	-2.61659
						0	5.79783	JL102921_110821_RPB4_C1_30B.14664.14664.5	NP	7.77475	0.310623	0.187	//18	22//121	6.84875	1.65625	R.TVK[1433.91]EVQFGLFSPEEVR.A	YDL140C	1	RPB1	TVKEVQFGLFSPEEVR	15	//11	5//47	0.926	0.555556	K.TLKEK[2271.23]AIPK.D	YPR187W	1	RPB6	TLKEKAIPK	72	402920	730615	435587	760925	0.572444	-0.804793	-0.996793
						0	1.26159	JL102921_110821_RPB4_C1.16007.16007.5	P	7.689	0.330404	0.2	//18	18//124	6.871	1.625	R.TVK[1091.68]EVQFGLFSPEEVR.A	YDL140C	1	RPB1	TVKEVQFGLFSPEEVR	15	2//6	5//29	0.818	0.833333	K.EK[2271.23]AIPK.D	YPR187W	1	RPB6	EKAIPK	72	255065	614902	273891	649860	0.421462	-1.24652	-1.43852
						1133	121.871	JL102921_110821_RPB4_C1_100B.19401.19401.3	P	7.68575	0.275762	0.0623	//18	16//72	7.275	1.5625	R.TVK[1091.68]EVQFGLFSPEEVR.A	YDL140C	1	RPB1	TVKEVQFGLFSPEEVR	15	1//6	3//17	0.41075	0.416667	K.EK[2271.23]AIPK.D	YPR187W	1	RPB6	EKAIPK	72	475968	1.18839e+06	510603	1.25786e+06	0.405929	-1.3007	-1.4927
						0	2.64123	JL102921_110821_RPB4_C1_50B.16232.16232.5	N	7.6505	0.36212		//18	21//121	6.6525	1.73333	R.TVK[1433.91]EVQFGLFSPEEVR.A	YDL140C	1	RPB1	TVKEVQFGLFSPEEVR	15	1//11	7//47	0.998	0.75	K.TLKEK[2271.24]AIPK.D	YPR187W	1	RPB6	TLKEKAIPK	72	415889	713511	450101	740593	0.607758	-0.718432	-0.910432
						-1	5.85548	JL102921_110821_RPB4_C1_50B.17241.17241.3	N	7.569	0.21902		//18	17//72	6.0295	1.56667	R.TVK[1091.66]EVQFGLFSPEEVR.A	YDL140C	1	RPB1	TVKEVQFGLFSPEEVR	15	//6	6//17	1.5395	1.6	K.EK[2271.22]AIPK.D	YPR187W	1	RPB6	EKAIPK	72	337662	905838	361470	961617	0.375898	-1.41159	-1.60359
						0	-0.896991	JL102921_110821_RPB4_C1.15851.15851.5	NP	7.552	0.267939	0.0794	//18	15//124	6.618	1.3125	R.TVK[1091.68]EVQFGLFSPEEVR.A	YDL140C	1	RPB1	TVKEVQFGLFSPEEVR	15	2//6	6//29	0.934	1.16667	K.EK[2271.23]AIPK.D	YPR187W	1	RPB6	EKAIPK	72	186014	1.20357e+06	190564	1.30721e+06	0.145779	-2.77814	-2.97014
						0	-2.29537	JL102921_110821_RPB4_C1_70B.16728.16728.4	P	7.41675	0.258383	0.562	//18	22//98	6.61375	1.90625	R.TVK[1091.68]EVQFGLFSPEEVR.A	YDL140C	1	RPB1	TVKEVQFGLFSPEEVR	15	1//6	4//23	0.803	0.75	K.EK[2271.23]AIPK.D	YPR187W	1	RPB6	EKAIPK	72	518585	947564	560542	987320	0.567741	-0.816696	-1.0087
						-1	10.9696	JL102921_110821_RPB4_C1_70B.16739.16739.3	N	7.203	0.22161		//18	15//72	5.751	1.4	R.TVK[1091.65]EVQFGLFSPEEVR.A	YDL140C	1	RPB1	TVKEVQFGLFSPEEVR	15	//6	5//17	1.452	1.2	K.EK[2271.2]AIPK.D	YPR187W	1	RPB6	EKAIPK	72	303999	644449	327513	676963	0.483798	-1.04752	-1.23952
						0	-0.223132	JL102921_110821_RPB4_C1.15827.15827.4	NP	6.50675	0.231771	0.0539	//18	19//98	5.577	1.71875	R.TVK[1091.68]EVQFGLFSPEEVR.A	YDL140C	1	RPB1	TVKEVQFGLFSPEEVR	15	1//6	5//23	0.92975	1.08333	K.EK[2271.23]AIPK.D	YPR187W	1	RPB6	EKAIPK	72	765156	1.97096e+06	820098	2.0889e+06	0.392597	-1.34888	-1.54088
						-2	-8.89397	JL102921_110821_RPB4_C1.14832.14832.5	NP	6.22075	0.237746	0.509	//18	17//121	5.29725	1.375	R.TVK[1433.91]EVQFGLFSPEEVR.A	YDL140C	1	RPB1	TVKEVQFGLFSPEEVR	15	2//11	6//47	0.9235	0.722222	K.TLKEK[2271.23]AIPK.D	YPR187W	1	RPB6	TLKEKAIPK	72	748818	1332206	809840	1.38588e+06	0.584349	-0.775097	-0.967097
						-1	3.3139	JL102921_110821_RPB4_C1_30B.14629.14629.5	P	5.572	0.228689	0.37	//18	19//121	5.025	1.40625	R.TVK[1433.91]EVQFGLFSPEEVR.A	YDL140C	1	RPB1	TVKEVQFGLFSPEEVR	15	//11	4//47	0.547	0.333333	K.TLKEK[2271.23]AIPK.D	YPR187W	1	RPB6	TLKEKAIPK	72	454888	750608	492671	777143	0.633951	-0.657557	-0.849557
						0	3.6665	JL102921_110821_RPB4_C1_D.19992.19992.3	N	5.484	0.190834		//18	13//72	3.6735	1.1	R.TVK[1091.69]EVQFGLFSPEEVR.A	YDL140C	1	RPB1	TVKEVQFGLFSPEEVR	15	//6	6//17	1.8105	1.6	K.EK[2271.24]AIPK.D	YPR187W	1	RPB6	EKAIPK	72	774093	1.17715e+06	839606	1.21194e+06	0.692777	-0.529537	-0.721537
						-1	2.16559	JL102921_110821_RPB4_C1_100B.19288.19288.3	N	5.37675	0.187647		1//18	15//72	4.18375	1.16667	R.TVK[1091.67]EVQFGLFSPEEVR.A	YDL140C	1	RPB1	TVKEVQFGLFSPEEVR	15	//6	5//17	1.193	1.2	K.EK[2271.23]AIPK.D	YPR187W	1	RPB6	EKAIPK	72	420732	713280	455446	739793	0.61564	-0.699842	-0.891842
						-2	2.23423	JL102921_110821_RPB4_C1_D.20179.20179.3	N	5.051	0.190701		//18	13//72	4.0195	1.1	R.TVK[1091.67]EVQFGLFSPEEVR.A	YDL140C	1	RPB1	TVKEVQFGLFSPEEVR	15	//6	4//17	1.0315	0.8	K.EK[2271.23]AIPK.D	YPR187W	1	RPB6	EKAIPK	72	593154	867387	643775	890463	0.722967	-0.467999	-0.659999
						0	-1.59993	JL102921_110821_RPB4_C1_30B.15668.15668.3	P	3.68325	0.105578	0.0903	//18	11//72	1.61625	0.65625	R.TVK[1091.68]EVQFGLFSPEEVR.A	YDL140C	1	RPB1	TVKEVQFGLFSPEEVR	15	//6	7//17	2.067	1.66667	K.EK[2271.23]AIPK.D	YPR187W	1	RPB6	EKAIPK	72	305699	1.38376e+06	320400	1.49259e+06	0.21466	-2.21987	-2.41187
	3	RPB1:15---RPB6:67	11.708	-1.14739	1.14739
						0	1.23201	JL102921_110821_RPB4_C1_30B.15009.15009.3	P	11.708	0.391251	0.0613	//18	27//73	10.9445	2.71875	R.TVK[895.59]EVQFGLFSPEEVR.A	YDL140C	1	RPB1	TVKEVQFGLFSPEEVR	15	//5	5//13	0.7635	1.5	R.K[2271.23]TLK.E	YPR187W	1	RPB6	KTLK	67	620467	1.27482e+06	668951	1.33698e+06	0.500343	-0.999009	-1.19101
						0	2.38668	JL102921_110821_RPB4_C1_30B.15003.15003.4	P	10.043	0.364749	0.000475	//18	24//98	9.6535	2.25	R.TVK[895.59]EVQFGLFSPEEVR.A	YDL140C	1	RPB1	TVKEVQFGLFSPEEVR	15	//5	3//18	0.3895	1	R.K[2271.23]TLK.E	YPR187W	1	RPB6	KTLK	67	1.19122e+06	1929312	1.2906e+06	1.99504e+06	0.646906	-0.628373	-0.820373
						0	0.438359	JL102921_110821_RPB4_C1_D.19347.19347.4	P	9.7005	0.355727	0.00915	//18	22//98	9.319	1.96875	R.TVK[895.59]EVQFGLFSPEEVR.A	YDL140C	1	RPB1	TVKEVQFGLFSPEEVR	15	//5	3//18	0.3815	1	R.K[2271.23]TLK.E	YPR187W	1	RPB6	KTLK	67	425232	683871	460768	706834	0.651876	-0.617332	-0.809332
						0	4.07428	JL102921_110821_RPB4_C1_70B.14309.14309.5	P	9.27375	0.350522	0.478	//18	23//124	9.27375	2.15625	R.TVK[1051.69]EVQFGLFSPEEVR.A	YDL140C	1	RPB1	TVKEVQFGLFSPEEVR	15	//5	//24	0	0	R.RK[2271.23]TLK.E	YPR187W	1	RPB6	RKTLK	67	539878	1.97874e+06	571495	2.12281e+06	0.269216	-1.89316	-2.08516
						0	1.99421	JL102921_110821_RPB4_C1_70B.14299.14299.5	P	8.95825	0.326979	0.622	//18	21//124	8.95825	2.03125	R.TVK[1051.69]EVQFGLFSPEEVR.A	YDL140C	1	RPB1	TVKEVQFGLFSPEEVR	15	//5	//24	0	0	R.RK[2271.23]TLK.E	YPR187W	1	RPB6	RKTLK	67	576344	1.947e+06	612107	2.08369e+06	0.293761	-1.76728	-1.95928
						0	2.65107	JL102921_110821_RPB4_C1_100B.16933.16933.5	P	8.7045	0.362861	0.692	//18	21//124	8.68275	1.9375	R.TVK[1051.69]EVQFGLFSPEEVR.A	YDL140C	1	RPB1	TVKEVQFGLFSPEEVR	15	//5	2//24	0.02175	0.2	R.RK[2271.23]TLK.E	YPR187W	1	RPB6	RKTLK	67	253187	470838	273571	491098	0.55706	-0.844095	-1.0361
						0	1.5563	JL102921_110821_RPB4_C1_50B.14412.14412.5	P	8.642	0.331105	0.373	//18	20//124	8.642	1.8125	R.TVK[1051.69]EVQFGLFSPEEVR.A	YDL140C	1	RPB1	TVKEVQFGLFSPEEVR	15	//5	//24	0	0	R.RK[2271.23]TLK.E	YPR187W	1	RPB6	RKTLK	67	899813	3.31934e+06	952249	3.56168e+06	0.26736	-1.90315	-2.09515
						0	6.00499	JL102921_110821_RPB4_C1.15284.15284.4	P	6.66925	0.225774	0.368	//18	20//98	6.27175	1.75	R.TVK[895.59]EVQFGLFSPEEVR.A	YDL140C	1	RPB1	TVKEVQFGLFSPEEVR	15	//5	3//18	0.3975	1	R.K[2271.23]TLK.E	YPR187W	1	RPB6	KTLK	67	1.34607e+06	2.04327e+06	1.46004e+06	2.10339e+06	0.694136	-0.52671	-0.71871
	4	RPB1:15---RPB6:70	11.05	-1.22239	1.22239
						0	3.91278	JL102921_110821_RPB4_C1_30B.12949.12949.4	P	11.05	0.39554	0.156	//18	27//97	10.9785	2.59375	R.TVK[1152.73]EVQFGLFSPEEVR.A	YDL140C	1	RPB1	TVKEVQFGLFSPEEVR	15	//8	3//23	0.0715	0.25	R.KTLK[2271.23]EK.A	YPR187W	1	RPB6	KTLKEK	70	1.24417e+06	2.33869e+06	1.34404e+06	2.44083e+06	0.550647	-0.8608	-1.0528
						0	2.47794	JL102921_110821_RPB4_C1_50B.14426.14426.3	N	10.1378	0.292893		1//18	22//71	9.1995	2.2	R.TVK[1152.74]EVQFGLFSPEEVR.A	YDL140C	1	RPB1	TVKEVQFGLFSPEEVR	15	//8	5//17	0.93825	1	R.KTLK[2271.24]EK.A	YPR187W	1	RPB6	KTLKEK	70	206335	534185	221118	566268	0.390483	-1.35667	-1.54867
						-1	2.78931	JL102921_110821_RPB4_C1_50B.14447.14447.3	N	9.5485	0.292791		//18	19//71	8.539	1.93333	R.TVK[1152.74]EVQFGLFSPEEVR.A	YDL140C	1	RPB1	TVKEVQFGLFSPEEVR	15	//8	7//17	1.0095	1.6	R.KTLK[2271.24]EK.A	YPR187W	1	RPB6	KTLKEK	70	252511	565637	271673	595783	0.455993	-1.13292	-1.32492
						-1	3.6741	JL102921_110821_RPB4_C1_30B.12941.12941.3	N	8.14475	0.215592		1//18	21//71	6.884	1.83333	R.TVK[1152.72]EVQFGLFSPEEVR.A	YDL140C	1	RPB1	TVKEVQFGLFSPEEVR	15	//8	8//17	1.26075	1.8	R.KTLK[2271.22]EK.A	YPR187W	1	RPB6	KTLKEK	70	298298	875939	318410	933049	0.341257	-1.55107	-1.74307
						0	-1.02695	JL102921_110821_RPB4_C1_30B.12965.12965.3	NP	7.8745	0.223381	0.689	//18	19//71	6.71225	1.46875	R.TVK[1152.73]EVQFGLFSPEEVR.A	YDL140C	1	RPB1	TVKEVQFGLFSPEEVR	15	//8	7//17	1.16225	1.41667	R.KTLK[2271.23]EK.A	YPR187W	1	RPB6	KTLKEK	70	343373	1.12921e+06	365054	1.20746e+06	0.302333	-1.72579	-1.91779
						0	1.69121	JL102921_110821_RPB4_C1_50B.16209.16209.5	N	7.61325	0.375879		//18	21//121	6.6965	1.93333	R.TVK[1433.9]EVQFGLFSPEEVR.A	YDL140C	1	RPB1	TVKEVQFGLFSPEEVR	15	//11	5//47	0.91675	0.625	K.TLK[2271.23]EKAIPK.D	YPR187W	1	RPB6	TLKEKAIPK	70	391604	666987	423878	691984	0.612554	-0.707092	-0.899092
	5	RPB1:1003---RPB6:76	8.8435	-0.906353	0.906353
						0	2.30151	JL102921_110821_RPB4_C1_50B.06454.06454.4	N	8.8435	0.303363		//11	18//55	7.43475	2.7	R.GK[1490.87]NEIIQNAQR.D	YDL140C	1	RPB1	GKNEIIQNAQR	1003	//11	8//39	1.40875	1.125	K.EKAIPK[1676.95]DQR.A	YPR187W	1	RPB6	EKAIPKDQR	76	311271	700434	334854	737924	0.453779	-1.13994	-1.33194
						0	0.928512	JL102921_110821_RPB4_C1_50B.06447.06447.5	N	6.99325	0.34469		//11	15//67	5.544	2.1	R.GK[1490.87]NEIIQNAQR.D	YDL140C	1	RPB1	GKNEIIQNAQR	1003	1//11	9//48	1.44925	1.1875	K.EKAIPK[1676.94]DQR.A	YPR187W	1	RPB6	EKAIPKDQR	76	667293	979429	724197	1.00577e+06	0.720046	-0.473839	-0.665839
						0	4.32747	JL102921_110821_RPB4_C1.06458.06458.4	P	6.6305	0.185984	0.598	1//11	15//57	6.2685	1.95455	R.GK[1233.73]NEIIQNAQR.D	YDL140C	1	RPB1	GKNEIIQNAQR	1003	//9	4//28	0.362	0.428571	K.AIPK[1676.94]DQR.A	YPR187W	1	RPB6	AIPKDQR	76	2.16554e+06	4.71665e+06	2.33151e+06	4.96129e+06	0.46994	-1.08945	-1.28145
						-2	-1.89305	JL102921_110821_RPB4_C1.07431.07431.5	NP	6.38525	0.219462	0.673	//11	12//65	5.0625	1.81818	R.GK[1788.04]NEIIQNAQR.D	YDL140C	1	RPB1	GKNEIIQNAQR	1003	//11	6//54	1.32275	0.722222	K.EK[425.27]AIPK[1676.94]DQR.A	YPR187W	1	RPB6	EKAIPKDQR	76	624647	1.01499e+06	676721	1.0498e+06	0.644619	-0.633482	-0.825482
						0	1.12801	JL102921_110821_RPB4_C1_50B.06915.06915.3	N	5.8385	0.229573		//11	18//45	4.8035	3.05	R.GK[1233.72]NEIIQNAQR.D	YDL140C	1	RPB1	GKNEIIQNAQR	1003	2//9	7//21	1.035	0.916667	K.AIPK[1676.94]DQR.A	YPR187W	1	RPB6	AIPKDQR	76	627213	1.33714e+06	675635	1.40499e+06	0.480881	-1.05625	-1.24825
						0	2.73658	JL102921_110821_RPB4_C1.07462.07462.4	NP	5.83825	0.165483	0.626	//11	13//53	3.53075	1.59091	R.GK[1788.04]NEIIQNAQR.D	YDL140C	1	RPB1	GKNEIIQNAQR	1003	//11	9//43	2.3075	1	K.EK[425.27]AIPK[1676.94]DQR.A	YPR187W	1	RPB6	EKAIPKDQR	76	603287	1.43369e+06	648068	1.51423e+06	0.427986	-1.22436	-1.41636
						0	2.03548	JL102921_110821_RPB4_C1.07438.07438.5	N	5.741	0.207571		//11	5//54	1.05575	0.5625	K.EK[425.27]AIPK[1676.95]DQR.A	YPR187W	1	RPB6	EKAIPKDQR	76	1//11	12//65	4.68525	1.7	R.GK[1788.05]NEIIQNAQR.D	YDL140C	1	RPB1	GKNEIIQNAQR	1003	623235	1.03439e+06	674927	1.07137e+06	0.629967	-0.666652	-0.858652
						0	4.7185	JL102921_110821_RPB4_C1.06459.06459.3	P	5.4745	0.167171	0.733	//11	17//45	4.79225	2.59091	R.GK[1233.73]NEIIQNAQR.D	YDL140C	1	RPB1	GKNEIIQNAQR	1003	1//9	4//21	0.68225	0.428571	K.AIPK[1676.94]DQR.A	YPR187W	1	RPB6	AIPKDQR	76	1.09583e+06	2.73613e+06	1.17557e+06	2.89607e+06	0.405918	-1.30074	-1.49274
						0	3.38967	JL102921_110821_RPB4_C1_30B.08069.08069.5	N	5.24025	0.198487		//11	8//54	0.92175	1.125	K.EK[425.27]AIPK[1676.95]DQR.A	YPR187W	1	RPB6	EKAIPKDQR	76	//11	13//65	4.3185	1.55	R.GK[1788.05]NEIIQNAQR.D	YDL140C	1	RPB1	GKNEIIQNAQR	1003	563427	1.40103e+06	604496	1.48267e+06	0.407708	-1.29439	-1.48639
						0	0.471105	JL102921_110821_RPB4_C1_50B.06969.06969.5	N	4.9685	0.195664		//11	15//69	3.99825	2.1	R.GK[1233.73]NEIIQNAQR.D	YDL140C	1	RPB1	GKNEIIQNAQR	1003	//9	6//35	0.97025	0.916667	K.AIPK[1676.94]DQR.A	YPR187W	1	RPB6	AIPKDQR	76	1.09972e+06	1.74661e+06	1.19189e+06	1.80372e+06	0.660793	-0.59773	-0.78973
						0	3.86431	JL102921_110821_RPB4_C1_30B.08108.08108.6	N	4.41325	0.154035		//11	8//43	2.01675	1.125	K.EK[425.27]AIPK[1676.95]DQR.A	YPR187W	1	RPB6	EKAIPKDQR	76	//11	10//53	2.3965	1.1	R.GK[1788.05]NEIIQNAQR.D	YDL140C	1	RPB1	GKNEIIQNAQR	1003	339162	725494	365317	762441	0.479141	-1.06148	-1.25348
						0	2.03255	JL102921_110821_RPB4_C1_70B.07333.07333.3	N	4.381	0.18871		1//11	16//45	3.3215	2.45	R.GK[1233.73]NEIIQNAQR.D	YDL140C	1	RPB1	GKNEIIQNAQR	1003	1//9	6//21	1.0595	0.833333	K.AIPK[1676.95]DQR.A	YPR187W	1	RPB6	AIPKDQR	76	176597	326834	190834	340803	0.559956	-0.836615	-1.02862
						-1	3.96405	JL102921_110821_RPB4_C1.06400.06400.4	N	4.32425	0.15503		2//11	11//57	3.412	1.45	R.GK[1233.72]NEIIQNAQR.D	YDL140C	1	RPB1	GKNEIIQNAQR	1003	1//9	6//28	0.91225	0.916667	K.AIPK[1676.93]DQR.A	YPR187W	1	RPB6	AIPKDQR	76	432958	657163	469615	676494	0.694189	-0.5266	-0.7186
						0	14.5319	JL102921_110821_RPB4_C1_30B.08630.08630.6	N	4.31975	0.156985		//16	11//123	3.39125	0.7	K.DLQENLLVLRGK[1233.78]NEIIQNAQR.D	YDL140C	1	RPB1	DLQENLLVLRGKNEIIQNAQR	1003	//9	4//27	0.9285	0.75	K.AIPK[2870.67]DQR.A	YPR187W	1	RPB6	AIPKDQR	76	826644	599890	904594	569034	1.5897	0.668754	0.476754
						0	15.4062	JL102921_110821_RPB4_C1.06154.06154.3	N	2.58425	0.183371		//11	8//43	1.6525	0.75	R.GK[1490.91]NEIIQNAQR.D	YDL140C	1	RPB1	GKNEIIQNAQR	1003	//11	5//30	0.93175	0.5625	K.EKAIPK[1676.98]DQR.A	YPR187W	1	RPB6	EKAIPKDQR	76	23681.7	117502	24695.3	127000	0.194451	-2.36252	-2.55452
	6	RPB1:1003---RPB6:128	7.121	0.860767	-0.860767
						0	2.94554	JL102921_110821_RPB4_C1.06543.06543.3	NP	7.121	0.208512	0.0198	//11	13//47	4.8735	1.72727	R.GK[1123.67]NEIIQNAQR.D	YDL140C	1	RPB1	GKNEIIQNAQR	1003	//8	6//19	2.2475	1.33333	K.ELAEK[1676.94]K.I	YPR187W	1	RPB6	ELAEKK	128	2.10699e+06	1.23757e+06	2.30921e+06	1.12876e+06	2.0458	1.03266	0.840664
						0	0.920054	JL102921_110821_RPB4_C1_50B.07040.07040.3	N	6.6515	0.220511		//11	13//47	4.117	1.9	R.GK[1123.67]NEIIQNAQR.D	YDL140C	1	RPB1	GKNEIIQNAQR	1003	//8	7//19	2.5345	1.7	K.ELAEK[1676.94]K.I	YPR187W	1	RPB6	ELAEKK	128	699844	501146	765919	474327	1.61475	0.691308	0.499308
						0	2.99356	JL102921_110821_RPB4_C1.06541.06541.4	P	6.49275	0.204722	0.687	//11	16//58	6.09175	2.09091	R.GK[1123.67]NEIIQNAQR.D	YDL140C	1	RPB1	GKNEIIQNAQR	1003	//8	6//25	0.401	0.666667	K.ELAEK[1676.94]K.I	YPR187W	1	RPB6	ELAEKK	128	2.81094e+06	1.82526e+06	3.07861e+06	1.69813e+06	1.81294	0.85833	0.66633
	7	RPB1:567---RPB6:36	2.24775	0.127539	-0.127539
						-1	22.6869	JL102921_110821_RPB4_C1.36496.36496.6	P	2.24775	0.0591288	0.637	//16	16//260	2.15825	0.421875	R.DTFIELDQVLNMLYWVPDWDGVIPTPAIIK[1913.96]PK.P	YDL140C	1	RPB1	DTFIELDQVLNMLYWVPDWDGVIPTPAIIKPK	567	//16	2//91	0.0895	0.0714286	K.PQFK[4133.2]DGETTDANGK.T	YPR187W	1	RPB6	PQFKDGETTDANGK	36	152994	154037	166898	152777	1.09243	0.127539	-0.0644609
7	RPB1---RPB7
	1	RPB1:2---RPB7:29	13.1327	-1.47704	1.47704
						-1	2.72735	JL102921_110821_RPB4_C1.13606.13606.3	N	13.1327	0.385985		//14	20//56	10.4177	2.53846	K.TK[1611.89]LLEEVEGSC[160.03]TGK.F	YDR404C	1	RPB7	TKLLEEVEGSCTGK	29	//	10//24	2.715	0.725	M.V[1928.01]GQQYSSAPLR.T	YDL140C	1	RPB1	VGQQYSSAPLR	2	227329	1.17001e+06	236548	1.26553e+06	0.186916	-2.41954	-2.61154
						0	1.29974	JL102921_110821_RPB4_C1_30B.13708.13708.4	N	10.5508	0.338241		//14	23//76	8.54025	2.73077	K.TK[1611.89]LLEEVEGSC[160.03]TGK.F	YDR404C	1	RPB7	TKLLEEVEGSCTGK	29	//	8//35	2.0105	0.6	M.V[1928]GQQYSSAPLR.T	YDL140C	1	RPB1	VGQQYSSAPLR	2	738191	1.57983e+06	795108	1.66032e+06	0.478887	-1.06224	-1.25424
						0	5.56954	JL102921_110821_RPB4_C1_70B.14452.14452.3	N	8.4825	0.260984		//14	15//56	7.1365	1.84615	K.TK[1611.9]LLEEVEGSC[160.03]TGK.F	YDR404C	1	RPB7	TKLLEEVEGSCTGK	29	//	9//24	1.346	0.575	M.V[1928.02]GQQYSSAPLR.T	YDL140C	1	RPB1	VGQQYSSAPLR	2	156361	311139	168702	325758	0.517876	-0.949321	-1.14132
8	RPB1---RPB8
	1	RPB1:533---RPB8:22	3.375	0.115369	-0.115369
						0	4.90547	JL102921_110821_RPB4_C1_100B.09336.09336.4	N	3.375	0.171229		//8	7//28	2.33725	1.4	R.YNK[1036.69]VC[160.03]R.I	YOR224C	1	RPB8	YNKVCR	22	//6	4//26	1.03775	0.9	R.K[1245.68]LTLR.D	YDL140C	1	RPB1	KLTLR	533	322033	326672	351270	324273	1.08325	0.115369	-0.0766308
	2	RPB1:977---RPB8:136	6.151	-0.753237	0.753237
						-1	3.63834	JL102921_110821_RPB4_C1_30B.17571.17571.5	N	6.151	0.157341		//15	17//171	3.0555	0.904762	R.IIQNAQQTFHIDHTK[2222.28]PSDLTIK.D	YDL140C	1	RPB1	IIQNAQQTFHIDHTKPSDLTIK	977	//17	14//108	3.0955	1.28571	R.NLNNLK[2954.62]QENAYLLIR.R	YOR224C	1	RPB8	NLNNLKQENAYLLIR	136	411873	598162	447073	613758	0.728419	-0.45716	-0.64916
						0	1.85651	JL102921_110821_RPB4_C1.22912.22912.6	P	5.67225	0.243058	0.642	//6	11//234	1.8865	0.327586	R.IIQNAQQTFHIDHTK[2222.26]PSDLTIK[425.27]DIVLGVK.D	YDL140C	1	RPB1	IIQNAQQTFHIDHTKPSDLTIKDIVLGVK	977	//17	10//108	3.78575	0.9	R.NLNNLK[3976.23]QENAYLLIR.R	YOR224C	1	RPB8	NLNNLKQENAYLLIR	136	246319	522776	265364	549183	0.483198	-1.04931	-1.24131
	3	RPB1:461---RPB8:136	6.423	0.300726	-0.300726
						0	0.948499	JL102921_110821_RPB4_C1_50B.20508.20508.4	N	6.423	0.207535		1//17	16//84	4.752	1.60714	R.NLNNLK[1615.96]QENAYLLIR.R	YOR224C	1	RPB8	NLNNLKQENAYLLIR	136	//10	7//44	1.671	1	R.VK[2222.26]VIPYSTFR.L	YDL140C	1	RPB1	VKVIPYSTFR	461	605398	548102	661163	536761	1.23176	0.300726	0.108726
	4	RPB1:452---RPB8:136	4.75	0.422613	-0.422613
						-1	7.49783	JL102921_110821_RPB4_C1_70B.14467.14467.5	N	4.75	0.181225		1//17	13//108	3.594	1.14286	R.NLNNLK[1990.93]QENAYLLIR.R	YOR224C	1	RPB8	NLNNLKQENAYLLIR	136	//14	8//81	1.156	0.681818	R.Q[111.03]PSLHK[2222.23]M[147.04]SM[147.04]M[147.04]AHR.V	YDL140C	1	RPB1	QPSLHKMSMMAHR	452	779096	655060	851472	635259	1.34035	0.422613	0.230613
	5	RPB1:984---RPB8:136	6.66175	-1.04702	1.04702
						-2	9.69884	JL102921_110821_RPB4_C1.22906.22906.5	N	6.66175	0.165028		//6	22//234	4.516	0.785714	R.IIQNAQQTFHIDHTK[2222.32]PSDLTIK[425.27]DIVLGVK.D	YDL140C	1	RPB1	IIQNAQQTFHIDHTKPSDLTIKDIVLGVK	984	//17	10//108	2.14575	0.964286	R.NLNNLK[3976.29]QENAYLLIR.R	YOR224C	1	RPB8	NLNNLKQENAYLLIR	136	340937	722519	367311	758959	0.483967	-1.04702	-1.23902
9	RPB1---RPB9
	1	RPB1:533---RPB9:77	4.2875	-0.815534	0.815534
						0	3.63388	JL102921_110821_RPB4_C1_70B.05497.05497.4	N	4.2875	0.158752		//13	12//61	3.1845	1.65	R.SDREC[160.03]PK[1036.69]C[160.03]HSR.E	YGL070C	1	RPB9	SDRECPKCHSR	77	//6	6//24	1.103	1.6	R.K[1837.88]LTLR.D	YDL140C	1	RPB1	KLTLR	533	168334	297400	182077	309252	0.588766	-0.764233	-0.956233
						0	3.19768	JL102921_110821_RPB4_C1_70B.05496.05496.5	N	3.884	0.166139		//13	10//76	2.1735	1.3	R.SDREC[160.03]PK[1036.69]C[160.03]HSR.E	YGL070C	1	RPB9	SDRECPKCHSR	77	//6	6//30	1.7105	1.6	R.K[1837.88]LTLR.D	YDL140C	1	RPB1	KLTLR	533	353671	667387	382028	696690	0.548348	-0.866836	-1.05884
	2	RPB1:1246---RPB9:20	10.493	-1.42298	1.42298
						0	2.57734	JL102921_110821_RPB4_C1_30B.07439.07439.5	NP	10.493	0.282419	0.00602	//17	25//158	9.2925	1.85	R.VVRPK[1310.67]SLDAETEAEEDHM[147.04]LK.K	YDL140C	1	RPB1	VVRPKSLDAETEAEEDHMLK	1246	//9	6//35	1.2005	1.14286	R.EDK[2719.39]ENNR.L	YGL070C	1	RPB9	EDKENNR	20	115447	466502	121681	501798	0.24249	-2.044	-2.236
						0	3.30162	JL102921_110821_RPB4_C1_30B.08536.08536.5	NP	10.2163	0.285239	0.106	//17	26//158	9.20825	1.95	R.VVRPK[1310.67]SLDAETEAEEDHMLK.K	YDL140C	1	RPB1	VVRPKSLDAETEAEEDHMLK	1246	//9	6//35	1.008	1.14286	R.EDK[2703.4]ENNR.L	YGL070C	1	RPB9	EDKENNR	20	498927	1.0445e+06	537678	1.0965e+06	0.490358	-1.02809	-1.22009
						0	2.52581	JL102921_110821_RPB4_C1_30B.08569.08569.6	NP	9.6215	0.277325	0.244	1//17	24//158	7.8355	1.7	R.VVRPK[1310.67]SLDAETEAEEDHMLK.K	YDL140C	1	RPB1	VVRPKSLDAETEAEEDHMLK	1246	//9	6//35	1.786	1.14286	R.EDK[2703.4]ENNR.L	YGL070C	1	RPB9	EDKENNR	20	965335	1.8606e+06	1.04226e+06	1.94462e+06	0.535971	-0.899773	-1.09177
						0	3.30162	JL102921_110821_RPB4_C1_30B.08532.08532.5	NP	9.57975	0.26318	0.284	//17	21//158	8.60925	1.65	R.VVRPK[1310.67]SLDAETEAEEDHMLK.K	YDL140C	1	RPB1	VVRPKSLDAETEAEEDHMLK	1246	//9	5//35	0.9705	0.928571	R.EDK[2703.4]ENNR.L	YGL070C	1	RPB9	EDKENNR	20	442687	867410	477791	907405	0.526547	-0.925366	-1.11737
						-1	2.57354	JL102921_110821_RPB4_C1_30B.07363.07363.6	NP	9.10375	0.259988	0.0119	//17	24//158	7.22575	1.625	R.VVRPK[1310.67]SLDAETEAEEDHM[147.04]LK.K	YDL140C	1	RPB1	VVRPKSLDAETEAEEDHMLK	1246	//9	6//35	1.878	1.14286	R.EDK[2719.39]ENNR.L	YGL070C	1	RPB9	EDKENNR	20	189414	609930	201531	651753	0.309214	-1.69332	-1.88532
						-1	2.79281	JL102921_110821_RPB4_C1.08032.08032.5	NP	8.9055	0.228387	0.49	1//17	25//158	7.7105	1.725	R.VVRPK[1310.67]SLDAETEAEEDHMLK.K	YDL140C	1	RPB1	VVRPKSLDAETEAEEDHMLK	1246	//9	6//35	1.195	1	R.EDK[2703.4]ENNR.L	YGL070C	1	RPB9	EDKENNR	20	623566	1626720	668093	1.72496e+06	0.38731	-1.36844	-1.56044
						0	1.81265	JL102921_110821_RPB4_C1_50B.07169.07169.5	N	8.52	0.258754		//17	27//158	7.33375	1.86842	R.VVRPK[1310.67]SLDAETEAEEDHM[147.04]LK.K	YDL140C	1	RPB1	VVRPKSLDAETEAEEDHMLK	1246	//9	5//35	1.18625	1.08333	R.EDK[2719.4]ENNR.L	YGL070C	1	RPB9	EDKENNR	20	1.10094e+06	1.39846e+06	1.19747e+06	1.41941e+06	0.843638	-0.245303	-0.437303
						0	1.638	JL102921_110821_RPB4_C1_70B.07560.07560.5	N	8.4955	0.230637		//17	23//158	7.395	1.60526	R.VVRPK[1310.67]SLDAETEAEEDHM[147.04]LK.K	YDL140C	1	RPB1	VVRPKSLDAETEAEEDHMLK	1246	//9	4//35	1.1005	1	R.EDK[2719.4]ENNR.L	YGL070C	1	RPB9	EDKENNR	20	252774	411360	273838	425512	0.64355	-0.635875	-0.827875
						0	4.06187	JL102921_110821_RPB4_C1_30B.07320.07320.5	NP	8.25375	0.213402	0.0157	//17	24//158	7.30425	1.525	R.VVRPK[1310.67]SLDAETEAEEDHM[147.04]LK.K	YDL140C	1	RPB1	VVRPKSLDAETEAEEDHMLK	1246	//9	6//35	0.9495	1.14286	R.EDK[2719.39]ENNR.L	YGL070C	1	RPB9	EDKENNR	20	276648	923121	293954	987547	0.297661	-1.74826	-1.94026
						-1	2.57354	JL102921_110821_RPB4_C1_30B.07349.07349.6	NP	7.895	0.240815	0.0288	//17	20//158	6.5445	1.425	R.VVRPK[1310.67]SLDAETEAEEDHM[147.04]LK.K	YDL140C	1	RPB1	VVRPKSLDAETEAEEDHMLK	1246	//9	5//35	1.3505	0.857143	R.EDK[2719.39]ENNR.L	YGL070C	1	RPB9	EDKENNR	20	261850	748021	279759	795991	0.351459	-1.50857	-1.70057
						-2	3.8404	JL102921_110821_RPB4_C1_30B.08564.08564.4	N	6.528	0.213938		//17	19//120	5.60225	1.28947	R.VVRPK[1310.68]SLDAETEAEEDHMLK.K	YDL140C	1	RPB1	VVRPKSLDAETEAEEDHMLK	1246	//9	5//28	0.92575	1.08333	R.EDK[2703.41]ENNR.L	YGL070C	1	RPB9	EDKENNR	20	193479	756367	204236	812887	0.251247	-1.99282	-2.18482
						0	2.13082	JL102921_110821_RPB4_C1_30B.08550.08550.4	N	5.86475	0.184813		//17	18//120	4.79775	1.15789	R.VVRPK[1310.67]SLDAETEAEEDHMLK.K	YDL140C	1	RPB1	VVRPKSLDAETEAEEDHMLK	1246	//9	7//28	1.067	1.25	R.EDK[2703.41]ENNR.L	YGL070C	1	RPB9	EDKENNR	20	175934	709829	185447	763506	0.242888	-2.04163	-2.23363
						-3	3.76879	JL102921_110821_RPB4_C1_30B.08580.08580.3	N	5.67575	0.166716		//17	15//82	4.5375	0.947368	R.VVRPK[1310.65]SLDAETEAEEDHMLK.K	YDL140C	1	RPB1	VVRPKSLDAETEAEEDHMLK	1246	//9	5//21	1.13825	1.08333	R.EDK[2703.38]ENNR.L	YGL070C	1	RPB9	EDKENNR	20	63274.6	314927	65971	340404	0.193802	-2.36734	-2.55934
	3	RPB1:403---RPB9:77	7.6135	0.364757	-0.364757
						0	1.89616	JL102921_110821_RPB4_C1_70B.05915.05915.5	N	7.6135	0.191198		//16	19//93	5.78575	2.07692	R.NGPNEHPGAK[1837.88]YVIR.D	YDL140C	1	RPB1	NGPNEHPGAKYVIR	403	//13	10//70	1.82775	1.15	R.SDREC[160.03]PK[1958.06]C[160.03]HSR.E	YGL070C	1	RPB9	SDRECPKCHSR	77	437948	441562	477741	438021	1.09068	0.125227	-0.0667728
						0	0.777094	JL102921_110821_RPB4_C1_70B.05914.05914.4	N	4.57	0.161103		//16	13//73	3.2495	1.11538	R.NGPNEHPGAK[1837.88]YVIR.D	YDL140C	1	RPB1	NGPNEHPGAKYVIR	403	//13	8//55	1.3205	0.85	R.SDREC[160.03]PK[1958.06]C[160.03]HSR.E	YGL070C	1	RPB9	SDRECPKCHSR	77	133599	100733	146151	96138	1.52023	0.604286	0.412286
10	RPB10---RPB2
	1	RPB10:59---RPB2:1102	7.7705	0.813294	-0.813294
						0	0.499329	JL102921_110821_RPB4_C1_D.24291.24291.5	NP	7.7705	0.209889	0.555	//16	17//97	6.4385	1.85714	R.MILTHVDLIEK[1627.87]FLR.Y	YOR210W	1	RPB10	MILTHVDLIEKFLR	59	//12	9//56	1.332	1.2	R.HMVDDK[2134.24]IHAR.A	YOR151C	1	RPB2	HMVDDKIHAR	1102	456817	300952	500265	280739	1.78195	0.83346	0.64146
						0	3.77933	JL102921_110821_RPB4_C1_D.23502.23502.5	NP	7.26	0.177491	0.203	//16	17//97	5.859	1.53571	R.MILTHVDLIEK[1643.86]FLR.Y	YOR210W	1	RPB10	MILTHVDLIEKFLR	59	1//12	9//58	1.401	1.1	R.HM[147.04]VDDK[2134.24]IHAR.A	YOR151C	1	RPB2	HMVDDKIHAR	1102	670738	355914	735577	317338	2.31796	1.21286	1.02086
						0	3.92669	JL102921_110821_RPB4_C1_D.24270.24270.5	N	7.16075	0.208052		//16	17//97	6.117	2	R.MILTHVDLIEK[1627.88]FLR.Y	YOR210W	1	RPB10	MILTHVDLIEKFLR	59	//12	8//56	1.04375	1.16667	R.HMVDDK[2134.25]IHAR.A	YOR151C	1	RPB2	HMVDDKIHAR	1102	457492	313829	500853	294873	1.69854	0.764295	0.572295
						0	3.30878	JL102921_110821_RPB4_C1_D.23093.23093.5	NP	5.6645	0.168519	0.16	//17	15//104	4.37625	1.32143	R.M[147.04]ILTHVDLIEK[1627.87]FLR.Y	YOR210W	1	RPB10	MILTHVDLIEKFLR	59	//12	8//56	1.28825	1.05	R.HMVDDK[2150.24]IHAR.A	YOR151C	1	RPB2	HMVDDKIHAR	1102	579081	481059	632947	465738	1.35902	0.442566	0.250566
	2	RPB10:59---RPB2:813	9.891	-0.531687	0.531687
						0	5.88435	JL102921_110821_RPB4_C1_D.29769.29769.5	NP	9.891	0.276154	0.305	2//16	25//98	8.2085	2.32143	R.MILTHVDLIEK[1463.8]FLR.Y	YOR210W	1	RPB10	MILTHVDLIEKFLR	59	1//10	11//43	1.6825	1.5625	R.AMEYLK[2134.24]FR.E	YOR151C	1	RPB2	AMEYLKFR	813	201446	300847	218562	309332	0.70656	-0.501116	-0.693116
						-1	8.79392	JL102921_110821_RPB4_C1.24862.24862.5	NP	9.42625	0.248632	0.428	1//16	22//98	7.98375	1.78571	R.MILTHVDLIEK[1463.8]FLR.Y	YOR210W	1	RPB10	MILTHVDLIEKFLR	59	1//10	9//43	1.4425	1.25	R.AMEYLK[2134.24]FR.E	YOR151C	1	RPB2	AMEYLKFR	813	235339	372913	255074	385046	0.66245	-0.594117	-0.786117
						0	-0.293524	JL102921_110821_RPB4_C1_D.29941.29941.5	NP	9.2535	0.273432	0.596	1//16	23//98	8.011	2.14286	R.MILTHVDLIEK[1463.8]FLR.Y	YOR210W	1	RPB10	MILTHVDLIEKFLR	59	//10	7//43	1.2425	1	R.AMEYLK[2134.24]FR.E	YOR151C	1	RPB2	AMEYLKFR	813	214350	370055	231955	384252	0.603655	-0.728205	-0.920205
						0	6.45102	JL102921_110821_RPB4_C1.24942.24942.3	P	9.0055	0.236968	0.678	2//16	20//56	8.132	2.03571	R.MILTHVDLIEK[1463.8]FLR.Y	YOR210W	1	RPB10	MILTHVDLIEKFLR	59	//10	5//27	0.8735	0.75	R.AMEYLK[2134.24]FR.E	YOR151C	1	RPB2	AMEYLKFR	813	1.22076e+06	1.74164e+06	1.32548e+06	1.78463e+06	0.742717	-0.429115	-0.621115
						-1	-0.922566	JL102921_110821_RPB4_C1.24900.24900.3	NP	8.57825	0.192843	0.464	2//16	21//56	7.60325	2.03571	R.MILTHVDLIEK[1463.8]FLR.Y	YOR210W	1	RPB10	MILTHVDLIEKFLR	59	//10	6//27	0.975	1	R.AMEYLK[2134.24]FR.E	YOR151C	1	RPB2	AMEYLKFR	813	547855	728193	595497	741957	0.802602	-0.317243	-0.509243
						0	3.33782	JL102921_110821_RPB4_C1.24883.24883.4	P	7.8835	0.211905	0.565	1//16	22//77	7.1975	2.10714	R.MILTHVDLIEK[1463.8]FLR.Y	YOR210W	1	RPB10	MILTHVDLIEKFLR	59	//10	4//35	0.686	0.5625	R.AMEYLK[2134.24]FR.E	YOR151C	1	RPB2	AMEYLKFR	813	955045	1.4483e+06	1.03592e+06	1.49081e+06	0.694872	-0.525181	-0.717181
						-1	1.61962	JL102921_110821_RPB4_C1.25155.25155.5	P	7.697	0.205223	0.539	1//16	21//98	6.8335	1.85714	R.MILTHVDLIEK[1463.8]FLR.Y	YOR210W	1	RPB10	MILTHVDLIEKFLR	59	//10	6//43	0.8635	0.6875	R.AMEYLK[2134.24]FR.E	YOR151C	1	RPB2	AMEYLKFR	813	421107	411327	459531	406550	1.13032	0.176728	-0.015272
						-1	-0.887046	JL102921_110821_RPB4_C1.25192.25192.4	P	7.12825	0.181762	0.353	1//16	22//77	6.6845	2	R.MILTHVDLIEK[1463.8]FLR.Y	YOR210W	1	RPB10	MILTHVDLIEKFLR	59	//10	4//35	0.44375	0.5625	R.AMEYLK[2134.24]FR.E	YOR151C	1	RPB2	AMEYLKFR	813	452985	638224	491937	653343	0.752953	-0.409367	-0.601367
						0	5.92539	JL102921_110821_RPB4_C1.23715.23715.4	P	5.9825	0.148181	0.718	1//17	19//82	5.54825	1.64286	R.M[147.04]ILTHVDLIEK[1463.8]FLR.Y	YOR210W	1	RPB10	MILTHVDLIEKFLR	59	//10	4//35	0.43425	0.5625	R.AMEYLK[2150.24]FR.E	YOR151C	1	RPB2	AMEYLKFR	813	828017	1.25517e+06	898142	1.29197e+06	0.695175	-0.524552	-0.716552
						-1	4.18434	JL102921_110821_RPB4_C1.22701.22701.5	P	5.9635	0.175614	0.446	//17	17//109	5.4145	1.63333	R.RMILTHVDLIEK[1463.8]FLR.Y	YOR210W	1	RPB10	RMILTHVDLIEKFLR	59	//10	4//43	0.549	0.5625	R.AMEYLK[2290.34]FR.E	YOR151C	1	RPB2	AMEYLKFR	813	281213	483496	304334	501915	0.606345	-0.72179	-0.91379
						-1	-1.40949	JL102921_110821_RPB4_C1.22687.22687.5	P	5.7205	0.1535	0.378	//17	18//109	5.108	1.46667	R.RMILTHVDLIEK[1463.8]FLR.Y	YOR210W	1	RPB10	RMILTHVDLIEKFLR	59	//10	5//43	0.6125	0.625	R.AMEYLK[2290.34]FR.E	YOR151C	1	RPB2	AMEYLKFR	813	230356	383318	249450	397088	0.6282	-0.670704	-0.862704
						0	5.40519	JL102921_110821_RPB4_C1_D.27414.27414.5	P	5.308	0.142111	0.313	1//17	15//105	4.85725	1.35714	R.M[147.04]ILTHVDLIEK[1479.8]FLR.Y	YOR210W	1	RPB10	MILTHVDLIEKFLR	59	//10	4//43	0.45075	0.375	R.AM[147.04]EYLK[2150.24]FR.E	YOR151C	1	RPB2	AMEYLKFR	813	370565	531346	402318	544672	0.738643	-0.437051	-0.629051
						-1	3.20881	JL102921_110821_RPB4_C1_D.26033.26033.5	P	5.21725	0.129737	0.723	//17	21//111	5.027	1.76667	R.RM[147.04]ILTHVDLIEK[1463.8]FLR.Y	YOR210W	1	RPB10	RMILTHVDLIEKFLR	59	//10	3//43	0.19025	0.3125	R.AMEYLK[2306.34]FR.E	YOR151C	1	RPB2	AMEYLKFR	813	355730	530974	385958	545929	0.706974	-0.500272	-0.692272
						0	4.12322	JL102921_110821_RPB4_C1.22691.22691.5	P	4.87775	0.130741	0.531	1//17	14//105	4.2155	1.32143	R.M[147.04]ILTHVDLIEK[1479.8]FLR.Y	YOR210W	1	RPB10	MILTHVDLIEKFLR	59	//10	5//43	0.66225	0.5625	R.AM[147.04]EYLK[2150.24]FR.E	YOR151C	1	RPB2	AMEYLKFR	813	207811	338016	225131	349632	0.64391	-0.635069	-0.827069
						-2	3.91474	JL102921_110821_RPB4_C1.22730.22730.6	P	4.23325	0.100629	0.626	//17	19//109	3.8975	1.4	R.RMILTHVDLIEK[1463.8]FLR.Y	YOR210W	1	RPB10	RMILTHVDLIEKFLR	59	//10	4//43	0.33575	0.375	R.AMEYLK[2290.34]FR.E	YOR151C	1	RPB2	AMEYLKFR	813	602097	997460	652059	1.03299e+06	0.631234	-0.663754	-0.855754
						0	2.86801	JL102921_110821_RPB4_C1_D.28644.28644.5	P	3.2055	0.0931791	0.589	//17	15//105	2.963	1.35714	R.M[147.04]ILTHVDLIEK[1463.8]FLR.Y	YOR210W	1	RPB10	MILTHVDLIEKFLR	59	//10	4//43	0.2425	0.375	R.AMEYLK[2150.24]FR.E	YOR151C	1	RPB2	AMEYLKFR	813	241847	381222	262151	393483	0.666233	-0.585901	-0.777901
						0	2.66976	JL102921_110821_RPB4_C1_D.29019.29019.5	P	2.46525	0.0657672	0.729	1//17	13//105	2.38975	1.07143	R.M[147.04]ILTHVDLIEK[1463.8]FLR.Y	YOR210W	1	RPB10	MILTHVDLIEKFLR	59	//10	2//43	0.0755	0.25	R.AMEYLK[2150.24]FR.E	YOR151C	1	RPB2	AMEYLKFR	813	128504	234767	138901	244614	0.567836	-0.816455	-1.00845
						-2	7.7588	JL102921_110821_RPB4_C1_D.24666.24666.6	P	2.25375	0.0527347	0.15	//17	12//111	1.824	0.8	R.RM[147.04]ILTHVDLIEK[1479.8]FLR.Y	YOR210W	1	RPB10	RMILTHVDLIEKFLR	59	//10	4//43	0.42975	0.375	R.AM[147.04]EYLK[2306.34]FR.E	YOR151C	1	RPB2	AMEYLKFR	813	224831	361794	243617	373958	0.651456	-0.61826	-0.81026
						-1	2.7844	JL102921_110821_RPB4_C1_D.28728.28728.6	P	1.94	0.0438205	0.56	//16	12//98	1.468	0.75	R.MILTHVDLIEK[1479.8]FLR.Y	YOR210W	1	RPB10	MILTHVDLIEKFLR	59	1//10	6//43	0.472	0.5625	R.AM[147.04]EYLK[2134.24]FR.E	YOR151C	1	RPB2	AMEYLKFR	813	413404	640120	448252	659886	0.679287	-0.557908	-0.749908
						-1	1.85082	JL102921_110821_RPB4_C1_D.27497.27497.6	P	1.85775	0.0430922	0.0506	//17	12//105	1.122	0.857143	R.M[147.04]ILTHVDLIEK[1479.8]FLR.Y	YOR210W	1	RPB10	MILTHVDLIEKFLR	59	//10	6//43	0.73575	0.625	R.AM[147.04]EYLK[2150.24]FR.E	YOR151C	1	RPB2	AMEYLKFR	813	257947	399884	279685	412266	0.67841	-0.559771	-0.751771
						0	6.5448	JL102921_110821_RPB4_C1_D.27559.27559.6	P	1.849	0.0429595	0.582	//17	14//105	1.15725	1.03571	R.M[147.04]ILTHVDLIEK[1479.8]FLR.Y	YOR210W	1	RPB10	MILTHVDLIEKFLR	59	//10	5//43	0.69175	0.5625	R.AM[147.04]EYLK[2150.24]FR.E	YOR151C	1	RPB2	AMEYLKFR	813	246504	378887	267317	390383	0.684758	-0.546334	-0.738334
	3	RPB10:59---RPB2:801	13.446	0.409028	-0.409028
						0	-2.17162	JL102921_110821_RPB4_C1_D.31754.31754.5	NP	13.446	0.279261	0.000372	//18	28//147	11.166	2.31579	R.MDTMANILYYPQK[2134.24]PLGTTR.A	YOR151C	1	RPB2	MDTMANILYYPQKPLGTTR	801	2//16	10//97	2.28	0.857143	R.MILTHVDLIEK[2619.36]FLR.Y	YOR210W	1	RPB10	MILTHVDLIEKFLR	59	756180	566031	827275	539594	1.53314	0.616493	0.424493
						0	-1.53182	JL102921_110821_RPB4_C1.27227.27227.4	NP	11.9038	0.267572	0.01	//18	22//111	7.38575	1.81579	R.MDTMANILYYPQK[2134.24]PLGTTR.A	YOR151C	1	RPB2	MDTMANILYYPQKPLGTTR	801	1//16	17//76	4.518	1.89286	R.MILTHVDLIEK[2619.36]FLR.Y	YOR210W	1	RPB10	MILTHVDLIEKFLR	59	1.07611e+06	790973	1.17746e+06	751847	1.56609	0.647167	0.455167
						-1	4.20934	JL102921_110821_RPB4_C1.27199.27199.5	P	11.4102	0.236222	0.0238	//18	25//147	9.74575	2.13158	R.MDTMANILYYPQK[2134.24]PLGTTR.A	YOR151C	1	RPB2	MDTMANILYYPQKPLGTTR	801	3//16	10//97	1.6645	0.75	R.MILTHVDLIEK[2619.36]FLR.Y	YOR210W	1	RPB10	MILTHVDLIEKFLR	59	1.06617e+06	798978	1.1664e+06	761797	1.53111	0.614582	0.422582
						-2	1.4023	JL102921_110821_RPB4_C1_30B.27581.27581.5	P	11.397	0.253916	6.36e-05	//18	25//147	9.82375	2.02632	R.MDTMANILYYPQK[2134.24]PLGTTR.A	YOR151C	1	RPB2	MDTMANILYYPQKPLGTTR	801	2//16	10//97	1.57325	0.785714	R.MILTHVDLIEK[2619.36]FLR.Y	YOR210W	1	RPB10	MILTHVDLIEKFLR	59	518454	421768	566789	407128	1.39216	0.47733	0.28533
						0	3.97783	JL102921_110821_RPB4_C1.27210.27210.5	NP	11.247	0.217293	0.00653	//18	25//147	9.58375	2.05263	R.MDTMANILYYPQK[2134.24]PLGTTR.A	YOR151C	1	RPB2	MDTMANILYYPQKPLGTTR	801	2//16	9//97	1.66325	0.75	R.MILTHVDLIEK[2619.36]FLR.Y	YOR210W	1	RPB10	MILTHVDLIEKFLR	59	1451757	1.03793e+06	1.58884e+06	982124	1.61776	0.693998	0.501998
						0	3.2509	JL102921_110821_RPB4_C1_D.31164.31164.4	NP	11.2215	0.311449	0.00104	//18	22//115	7.924	1.68421	R.M[147.04]DTMANILYYPQK[2134.24]PLGTTR.A	YOR151C	1	RPB2	MDTMANILYYPQKPLGTTR	801	//16	13//76	3.2975	1.35714	R.MILTHVDLIEK[2635.36]FLR.Y	YOR210W	1	RPB10	MILTHVDLIEKFLR	59	588968	436032	644401	414941	1.553	0.635055	0.443055
						-2	6.10482	JL102921_110821_RPB4_C1.27186.27186.5	P	10.8983	0.250904	0.122	//18	25//147	8.7115	1.94737	R.MDTMANILYYPQK[2134.24]PLGTTR.A	YOR151C	1	RPB2	MDTMANILYYPQKPLGTTR	801	2//16	13//97	2.18675	1.10714	R.MILTHVDLIEK[2619.36]FLR.Y	YOR210W	1	RPB10	MILTHVDLIEKFLR	59	518069	432109	566239	418583	1.35275	0.435898	0.243898
						-1	3.12415	JL102921_110821_RPB4_C1_30B.27526.27526.5	P	10.4008	0.238012	0.00464	//18	26//147	9.14475	2.07895	R.MDTMANILYYPQK[2134.24]PLGTTR.A	YOR151C	1	RPB2	MDTMANILYYPQKPLGTTR	801	2//16	9//97	1.256	0.571429	R.MILTHVDLIEK[2619.36]FLR.Y	YOR210W	1	RPB10	MILTHVDLIEKFLR	59	851995	629898	932195	599298	1.55548	0.637358	0.445358
						0	1.93603	JL102921_110821_RPB4_C1_D.30182.30182.5	NP	10.3812	0.235702	0.00118	//18	24//147	8.54375	1.76316	R.MDTM[147.04]ANILYYPQK[2134.24]PLGTTR.A	YOR151C	1	RPB2	MDTMANILYYPQKPLGTTR	801	1//16	10//97	1.8375	0.821429	R.MILTHVDLIEK[2635.36]FLR.Y	YOR210W	1	RPB10	MILTHVDLIEKFLR	59	812341	680621	887834	659728	1.34576	0.428418	0.236418
						0	5.97213	JL102921_110821_RPB4_C1.26233.26233.5	P	10.3567	0.198077	0.0159	//18	27//147	9.715	2.10526	R.MDTMANILYYPQK[2150.24]PLGTTR.A	YOR151C	1	RPB2	MDTMANILYYPQKPLGTTR	801	//17	7//104	0.64175	0.5	R.M[147.04]ILTHVDLIEK[2619.36]FLR.Y	YOR210W	1	RPB10	MILTHVDLIEKFLR	59	1.14443e+06	870010	1.25187e+06	831382	1.50577	0.590501	0.398501
						-1	2.32836	JL102921_110821_RPB4_C1_30B.25872.25872.4	NP	10.3513	0.284316	0.0748	//18	19//111	6.46425	1.21053	R.MDTM[147.04]ANILYYPQK[2134.24]PLGTTR.A	YOR151C	1	RPB2	MDTMANILYYPQKPLGTTR	801	//16	14//76	3.887	1.39286	R.MILTHVDLIEK[2635.36]FLR.Y	YOR210W	1	RPB10	MILTHVDLIEKFLR	59	175831	158518	192035	155154	1.23771	0.307668	0.115668
						-1	3.06302	JL102921_110821_RPB4_C1_70B.25035.25035.5	NP	9.93975	0.225798	0.00346	//18	22//154	7.82825	1.68421	R.M[147.04]DTM[147.04]ANILYYPQK[2150.24]PLGTTR.A	YOR151C	1	RPB2	MDTMANILYYPQKPLGTTR	801	2//17	13//104	2.1115	1.03571	R.M[147.04]ILTHVDLIEK[2651.35]FLR.Y	YOR210W	1	RPB10	MILTHVDLIEKFLR	59	808751	707564	883547	689863	1.28076	0.356998	0.164998
						-1	6.27438	JL102921_110821_RPB4_C1_D.29271.29271.4	NP	9.786	0.258783	0.000804	1//18	20//111	5.84625	1.39474	R.MDTM[147.04]ANILYYPQK[2150.24]PLGTTR.A	YOR151C	1	RPB2	MDTMANILYYPQKPLGTTR	801	1//17	15//81	3.93975	1.39286	R.M[147.04]ILTHVDLIEK[2635.36]FLR.Y	YOR210W	1	RPB10	MILTHVDLIEKFLR	59	414552	370705	452793	362462	1.24922	0.321022	0.129022
						0	2.85843	JL102921_110821_RPB4_C1_50B.26169.26169.5	N	9.6545	0.216675		//18	22//148	7.29875	1.75	R.M[147.04]DTM[147.04]ANILYYPQK[2150.25]PLGTTR.A	YOR151C	1	RPB2	MDTMANILYYPQKPLGTTR	801	2//16	12//97	2.35575	1.26923	R.M[147.04]ILTHVDLIEK[2651.37]FLR.Y	YOR210W	1	RPB10	MILTHVDLIEKFLR	59	1557623	1156399	1.70418e+06	1.10095e+06	1.54792	0.630327	0.438327
						0	3.47791	JL102921_110821_RPB4_C1_100B.27329.27329.5	NP	9.54175	0.19601	1.23e-05	//18	22//154	7.16675	1.63158	R.M[147.04]DTM[147.04]ANILYYPQK[2150.24]PLGTTR.A	YOR151C	1	RPB2	MDTMANILYYPQKPLGTTR	801	2//17	10//104	2.375	0.928571	R.M[147.04]ILTHVDLIEK[2651.35]FLR.Y	YOR210W	1	RPB10	MILTHVDLIEKFLR	59	2213775	1.7093e+06	2.42128e+06	1.63731e+06	1.47882	0.564445	0.372445
						-1	1.25251	JL102921_110821_RPB4_C1.25693.25693.4	N	9.5265	0.245944		//18	22//111	6.6115	1.55556	R.M[147.04]DTMANILYYPQK[2150.24]PLGTTR.A	YOR151C	1	RPB2	MDTMANILYYPQKPLGTTR	801	//16	14//76	2.915	1.46154	R.M[147.04]ILTHVDLIEK[2635.36]FLR.Y	YOR210W	1	RPB10	MILTHVDLIEKFLR	59	420237	362096	459169	352323	1.30326	0.382126	0.190126
						0	-5.05194	JL102921_110821_RPB4_C1.26583.26583.4	NP	9.5115	0.240447	0.0208	//18	18//115	6.861	1.28947	R.M[147.04]DTMANILYYPQK[2134.24]PLGTTR.A	YOR151C	1	RPB2	MDTMANILYYPQKPLGTTR	801	//16	12//76	2.6505	1.28571	R.MILTHVDLIEK[2635.36]FLR.Y	YOR210W	1	RPB10	MILTHVDLIEKFLR	59	784801	551552	859023	520398	1.6507	0.72308	0.53108
						0	1.83577	JL102921_110821_RPB4_C1_100B.27316.27316.4	NP	9.40525	0.261475	0.000685	//18	21//116	5.794	1.39474	R.M[147.04]DTM[147.04]ANILYYPQK[2150.24]PLGTTR.A	YOR151C	1	RPB2	MDTMANILYYPQKPLGTTR	801	//17	14//81	3.61125	1.46429	R.M[147.04]ILTHVDLIEK[2651.35]FLR.Y	YOR210W	1	RPB10	MILTHVDLIEKFLR	59	221124	198994	241507	194727	1.24024	0.310615	0.118615
						-1	4.32136	JL102921_110821_RPB4_C1.25007.25007.4	P	9.16875	0.200508	0.0706	1//18	20//116	7.363	1.57895	R.M[147.04]DTM[147.04]ANILYYPQK[2134.24]PLGTTR.A	YOR151C	1	RPB2	MDTMANILYYPQKPLGTTR	801	2//16	12//76	1.80575	0.821429	R.MILTHVDLIEK[2651.35]FLR.Y	YOR210W	1	RPB10	MILTHVDLIEKFLR	59	731905	591620	800186	570560	1.40246	0.487956	0.295956
						0	3.35609	JL102921_110821_RPB4_C1_D.29772.29772.5	NP	9.142	0.203999	0.00488	1//18	22//154	7.09475	1.5	R.M[147.04]DTM[147.04]ANILYYPQK[2134.24]PLGTTR.A	YOR151C	1	RPB2	MDTMANILYYPQKPLGTTR	801	//16	8//97	2.04725	0.785714	R.MILTHVDLIEK[2651.35]FLR.Y	YOR210W	1	RPB10	MILTHVDLIEKFLR	59	1.32581e+06	971891	1.45072e+06	923414	1.57104	0.651716	0.459716
						0	-0.848384	JL102921_110821_RPB4_C1.25027.25027.4	NP	9.086	0.208485	0.0315	//18	18//116	6.01025	1.26316	R.M[147.04]DTM[147.04]ANILYYPQK[2134.24]PLGTTR.A	YOR151C	1	RPB2	MDTMANILYYPQKPLGTTR	801	1//16	15//76	3.07575	1.42857	R.MILTHVDLIEK[2651.35]FLR.Y	YOR210W	1	RPB10	MILTHVDLIEKFLR	59	784101	655797	856985	635510	1.3485	0.431354	0.239354
						0	1.05987	JL102921_110821_RPB4_C1_D.30894.30894.4	NP	9.044	0.229747	0.00077	//18	18//111	5.155	1.18421	R.MDTMANILYYPQK[2150.24]PLGTTR.A	YOR151C	1	RPB2	MDTMANILYYPQKPLGTTR	801	//17	14//81	3.889	1.57143	R.M[147.04]ILTHVDLIEK[2619.36]FLR.Y	YOR210W	1	RPB10	MILTHVDLIEKFLR	59	327941	268147	358498	259028	1.38401	0.468859	0.276859
						-2	4.67556	JL102921_110821_RPB4_C1.25167.25167.6	P	8.9965	0.251601	0.0695	1//18	24//147	7.1705	2.05263	R.MDTMANILYYPQK[2290.34]PLGTTR.A	YOR151C	1	RPB2	MDTMANILYYPQKPLGTTR	801	1//17	13//108	1.826	1.03333	R.RMILTHVDLIEK[2619.36]FLR.Y	YOR210W	1	RPB10	RMILTHVDLIEKFLR	59	463946	395128	506984	383859	1.32076	0.401365	0.209365
						0	-0.554568	JL102921_110821_RPB4_C1_D.30239.30239.4	NP	8.98725	0.243815	0.00483	//18	17//111	5.2955	1.10526	R.MDTM[147.04]ANILYYPQK[2134.24]PLGTTR.A	YOR151C	1	RPB2	MDTMANILYYPQKPLGTTR	801	//16	15//76	3.69175	1.5	R.MILTHVDLIEK[2635.36]FLR.Y	YOR210W	1	RPB10	MILTHVDLIEKFLR	59	498698	411038	545127	397508	1.37136	0.455606	0.263606
						0	5.12206	JL102921_110821_RPB4_C1.25201.25201.6	NP	8.87225	0.257918	0.0631	1//18	21//147	5.975	1.57895	R.MDTMANILYYPQK[2290.34]PLGTTR.A	YOR151C	1	RPB2	MDTMANILYYPQKPLGTTR	801	//17	12//108	2.89725	0.9	R.RMILTHVDLIEK[2619.36]FLR.Y	YOR210W	1	RPB10	RMILTHVDLIEKFLR	59	896354	712088	980128	685007	1.43083	0.516853	0.324853
						-1	0.130175	JL102921_110821_RPB4_C1_D.28765.28765.5	NP	8.842	0.21275	0.000534	1//18	23//154	7.07675	1.76316	R.M[147.04]DTM[147.04]ANILYYPQK[2150.24]PLGTTR.A	YOR151C	1	RPB2	MDTMANILYYPQKPLGTTR	801	1//17	8//104	1.76525	0.785714	R.M[147.04]ILTHVDLIEK[2651.35]FLR.Y	YOR210W	1	RPB10	MILTHVDLIEKFLR	59	1.43429e+06	1.39019e+06	1.56529e+06	1.3728e+06	1.14022	0.189307	-0.00269279
						-3	3.02027	JL102921_110821_RPB4_C1_30B.25886.25886.4	P	8.7745	0.229687	0.00692	//18	16//111	5.75925	1.15789	R.MDTM[147.04]ANILYYPQK[2134.24]PLGTTR.A	YOR151C	1	RPB2	MDTMANILYYPQKPLGTTR	801	//16	12//76	3.01525	1.17857	R.MILTHVDLIEK[2635.36]FLR.Y	YOR210W	1	RPB10	MILTHVDLIEKFLR	59	252012	209056	275458	202358	1.36124	0.444922	0.252922
						0	3.20279	JL102921_110821_RPB4_C1.27241.27241.3	NP	8.5195	0.236285	0.0154	//18	16//75	5.5005	1.26316	R.MDTMANILYYPQK[2134.24]PLGTTR.A	YOR151C	1	RPB2	MDTMANILYYPQKPLGTTR	801	//16	12//55	3.019	1.10714	R.MILTHVDLIEK[2619.36]FLR.Y	YOR210W	1	RPB10	MILTHVDLIEKFLR	59	257733	180956	282110	170707	1.6526	0.724736	0.532736
						-1	3.8994	JL102921_110821_RPB4_C1.24598.24598.6	NP	8.46675	0.265711	0.203	1//18	21//153	6.07975	1.52632	R.M[147.04]DTMANILYYPQK[2290.34]PLGTTR.A	YOR151C	1	RPB2	MDTMANILYYPQKPLGTTR	801	//17	12//108	2.387	0.833333	R.RMILTHVDLIEK[2635.36]FLR.Y	YOR210W	1	RPB10	RMILTHVDLIEKFLR	59	811478	765603	885849	753602	1.17549	0.233259	0.041259
						-1	3.27762	JL102921_110821_RPB4_C1_30B.24430.24430.5	NP	8.40875	0.19893	0.0025	1//18	23//154	6.54275	1.65789	R.M[147.04]DTM[147.04]ANILYYPQK[2150.24]PLGTTR.A	YOR151C	1	RPB2	MDTMANILYYPQKPLGTTR	801	1//17	10//104	1.866	0.821429	R.M[147.04]ILTHVDLIEK[2651.35]FLR.Y	YOR210W	1	RPB10	MILTHVDLIEKFLR	59	800433	671957	874804	651506	1.34274	0.425181	0.233181
						0	1.07115	JL102921_110821_RPB4_C1_D.31150.31150.5	NP	8.37425	0.180813	1.94e-05	//18	23//153	6.902	1.68421	R.M[147.04]DTMANILYYPQK[2134.24]PLGTTR.A	YOR151C	1	RPB2	MDTMANILYYPQKPLGTTR	801	//16	11//97	1.47225	1.03571	R.MILTHVDLIEK[2635.36]FLR.Y	YOR210W	1	RPB10	MILTHVDLIEKFLR	59	695474	541278	760610	519104	1.46524	0.551134	0.359134
						0	-0.658608	JL102921_110821_RPB4_C1.26579.26579.5	NP	8.37325	0.172914	0.0327	//18	26//153	6.67725	1.84211	R.M[147.04]DTMANILYYPQK[2134.24]PLGTTR.A	YOR151C	1	RPB2	MDTMANILYYPQKPLGTTR	801	//16	10//97	1.696	1.03571	R.MILTHVDLIEK[2635.36]FLR.Y	YOR210W	1	RPB10	MILTHVDLIEKFLR	59	2.05462e+06	1.37091e+06	2.24982e+06	1.28179e+06	1.75522	0.811648	0.619648
						0	5.46038	JL102921_110821_RPB4_C1.24491.24491.5	N	8.3605	0.187013		//18	20//147	5.94325	1.52778	R.MDTM[147.04]ANILYYPQK[2150.26]PLGTTR.A	YOR151C	1	RPB2	MDTMANILYYPQKPLGTTR	801	2//16	13//97	2.41725	1.30769	R.M[147.04]ILTHVDLIEK[2635.38]FLR.Y	YOR210W	1	RPB10	MILTHVDLIEKFLR	59	718555	620542	785108	603975	1.2999	0.378401	0.186401
						0	6.84879	JL102921_110821_RPB4_C1_D.29859.29859.4	NP	8.241	0.210665	0.256	//18	16//116	5.5695	1.13158	R.M[147.04]DTM[147.04]ANILYYPQK[2134.24]PLGTTR.A	YOR151C	1	RPB2	MDTMANILYYPQKPLGTTR	801	1//16	13//76	2.6715	1.14286	R.MILTHVDLIEK[2651.35]FLR.Y	YOR210W	1	RPB10	MILTHVDLIEKFLR	59	331001	292096	361582	285111	1.26822	0.342801	0.150801
						0	5.8715	JL102921_110821_RPB4_C1_D.27634.27634.6	P	8.13375	0.230643	0.0226	//18	18//154	6.153	1.39474	R.M[147.04]DTM[147.04]ANILYYPQK[2290.34]PLGTTR.A	YOR151C	1	RPB2	MDTMANILYYPQKPLGTTR	801	//17	10//108	1.98075	0.733333	R.RMILTHVDLIEK[2651.35]FLR.Y	YOR210W	1	RPB10	RMILTHVDLIEKFLR	59	391082	416498	426347	415632	1.02578	0.0367208	-0.155279
						0	1.63284	JL102921_110821_RPB4_C1.24512.24512.5	NP	8.09075	0.179388	0.141	//18	21//147	6.70025	1.55263	R.MDTM[147.04]ANILYYPQK[2150.24]PLGTTR.A	YOR151C	1	RPB2	MDTMANILYYPQKPLGTTR	801	//17	7//104	1.3905	0.714286	R.M[147.04]ILTHVDLIEK[2635.36]FLR.Y	YOR210W	1	RPB10	MILTHVDLIEKFLR	59	1.03666e+06	826360	1.13352e+06	795329	1.42522	0.511183	0.319183
						-1	6.5951	JL102921_110821_RPB4_C1_30B.26847.26847.4	P	8.07075	0.209293	0.299	//18	18//115	5.69825	1.10526	R.M[147.04]DTMANILYYPQK[2134.24]PLGTTR.A	YOR151C	1	RPB2	MDTMANILYYPQKPLGTTR	801	//16	13//76	2.3725	1.32143	R.MILTHVDLIEK[2635.36]FLR.Y	YOR210W	1	RPB10	MILTHVDLIEKFLR	59	238200	209614	260214	204526	1.27228	0.347414	0.155414
						-2	0.865958	JL102921_110821_RPB4_C1.27216.27216.3	N	8.06925	0.301812		//18	14//75	4.8545	1.05556	R.MDTMANILYYPQK[2134.24]PLGTTR.A	YOR151C	1	RPB2	MDTMANILYYPQKPLGTTR	801	//16	10//55	3.21475	1.11538	R.MILTHVDLIEK[2619.36]FLR.Y	YOR210W	1	RPB10	MILTHVDLIEKFLR	59	185086	126110	202639	118352	1.71216	0.775819	0.583819
						0	-3.75776	JL102921_110821_RPB4_C1.26288.26288.5	P	8.0675	0.171987	0.0217	//18	22//147	7.20625	1.65789	R.MDTMANILYYPQK[2150.24]PLGTTR.A	YOR151C	1	RPB2	MDTMANILYYPQKPLGTTR	801	//17	11//104	0.86125	0.892857	R.M[147.04]ILTHVDLIEK[2619.36]FLR.Y	YOR210W	1	RPB10	MILTHVDLIEKFLR	59	636728	505461	696242	486185	1.43205	0.518083	0.326083
						-1	3.4023	JL102921_110821_RPB4_C1_30B.25466.25466.4	NP	7.9765	0.204426	0.00628	//18	19//116	5.87275	1.36842	R.M[147.04]DTM[147.04]ANILYYPQK[2134.24]PLGTTR.A	YOR151C	1	RPB2	MDTMANILYYPQKPLGTTR	801	1//16	12//76	2.10375	1	R.MILTHVDLIEK[2651.35]FLR.Y	YOR210W	1	RPB10	MILTHVDLIEKFLR	59	185965	166486	203117	162808	1.24759	0.319146	0.127146
						-1	0.497733	JL102921_110821_RPB4_C1_50B.26156.26156.4	N	7.92875	0.209183		//18	17//112	4.97475	1.38889	R.M[147.04]DTM[147.04]ANILYYPQK[2150.24]PLGTTR.A	YOR151C	1	RPB2	MDTMANILYYPQKPLGTTR	801	//16	14//76	2.954	1.11538	R.M[147.04]ILTHVDLIEK[2651.36]FLR.Y	YOR210W	1	RPB10	MILTHVDLIEKFLR	59	334258	263331	365525	253004	1.44474	0.530814	0.338814
						-1	4.32136	JL102921_110821_RPB4_C1.25000.25000.4	P	7.88425	0.176862	0.0326	1//18	20//116	5.5005	1.31579	R.M[147.04]DTM[147.04]ANILYYPQK[2134.24]PLGTTR.A	YOR151C	1	RPB2	MDTMANILYYPQKPLGTTR	801	1//16	13//76	2.38375	1.07143	R.MILTHVDLIEK[2651.35]FLR.Y	YOR210W	1	RPB10	MILTHVDLIEKFLR	59	701486	593385	766609	575927	1.33109	0.412603	0.220603
						0	2.35086	JL102921_110821_RPB4_C1.25006.25006.5	NP	7.8475	0.161458	0.0391	1//18	23//154	6.61675	1.57895	R.M[147.04]DTM[147.04]ANILYYPQK[2134.24]PLGTTR.A	YOR151C	1	RPB2	MDTMANILYYPQKPLGTTR	801	1//16	8//97	1.23075	0.607143	R.MILTHVDLIEK[2651.35]FLR.Y	YOR210W	1	RPB10	MILTHVDLIEKFLR	59	1.26694e+06	1.00652e+06	1.38535e+06	968242	1.43079	0.516808	0.324808
						-1	2.67431	JL102921_110821_RPB4_C1.26247.26247.4	NP	7.7605	0.188421	0.0246	//18	17//111	4.80475	1.23684	R.MDTMANILYYPQK[2150.24]PLGTTR.A	YOR151C	1	RPB2	MDTMANILYYPQKPLGTTR	801	1//17	11//81	2.95575	1.03571	R.M[147.04]ILTHVDLIEK[2619.36]FLR.Y	YOR210W	1	RPB10	MILTHVDLIEKFLR	59	498271	354163	545347	334796	1.62889	0.703893	0.511893
						-1	0.237163	JL102921_110821_RPB4_C1_50B.26127.26127.5	N	7.75225	0.176382		//18	21//148	5.864	1.66667	R.M[147.04]DTM[147.04]ANILYYPQK[2150.24]PLGTTR.A	YOR151C	1	RPB2	MDTMANILYYPQKPLGTTR	801	1//16	11//97	1.88825	0.961538	R.M[147.04]ILTHVDLIEK[2651.35]FLR.Y	YOR210W	1	RPB10	MILTHVDLIEKFLR	59	431814	414245	471307	408567	1.15356	0.206094	0.0140939
						0	-2.17267	JL102921_110821_RPB4_C1_30B.25028.25028.5	NP	7.7155	0.179769	0.0293	//18	20//147	6.44825	1.34211	R.MDTM[147.04]ANILYYPQK[2150.24]PLGTTR.A	YOR151C	1	RPB2	MDTMANILYYPQKPLGTTR	801	1//17	8//104	1.26725	0.678571	R.M[147.04]ILTHVDLIEK[2635.36]FLR.Y	YOR210W	1	RPB10	MILTHVDLIEKFLR	59	952055	843601	1.03997e+06	823867	1.26231	0.336065	0.144065
						-6	-41.1199	JL102921_110821_RPB4_C1.27208.27208.4	P	7.65475	0.176737	0.0226	1//18	19//111	4.5915	1.07895	R.MDTMANILYYPQK[2134.24]PLGTTR.A	YOR151C	1	RPB2	MDTMANILYYPQKPLGTTR	801	1//16	12//76	3.06325	1.21429	R.MILTHVDLIEK[2619.36]FLR.Y	YOR210W	1	RPB10	MILTHVDLIEKFLR	59	580370	473284	634463	457014	1.38828	0.473298	0.281298
						0	-1.88233	JL102921_110821_RPB4_C1_30B.25507.25507.4	NP	7.65225	0.208131	0.065	//18	17//116	5.5605	1.18421	R.M[147.04]DTM[147.04]ANILYYPQK[2134.24]PLGTTR.A	YOR151C	1	RPB2	MDTMANILYYPQKPLGTTR	801	1//16	8//76	2.09175	0.785714	R.MILTHVDLIEK[2651.35]FLR.Y	YOR210W	1	RPB10	MILTHVDLIEKFLR	59	223892	211928	244403	208689	1.17114	0.22791	0.0359102
						0	-5.78836	JL102921_110821_RPB4_C1.24517.24517.4	NP	7.65175	0.168982	0.0419	//18	18//111	5.093	1.18421	R.MDTM[147.04]ANILYYPQK[2150.24]PLGTTR.A	YOR151C	1	RPB2	MDTMANILYYPQKPLGTTR	801	1//17	14//81	2.55875	1.14286	R.M[147.04]ILTHVDLIEK[2635.36]FLR.Y	YOR210W	1	RPB10	MILTHVDLIEKFLR	59	721479	638269	788118	623209	1.26461	0.338697	0.146697
						-1	4.90035	JL102921_110821_RPB4_C1_D.28083.28083.6	P	7.64325	0.20619	0.0625	//18	20//147	5.0545	1.39474	R.MDTM[147.04]ANILYYPQK[2290.34]PLGTTR.A	YOR151C	1	RPB2	MDTMANILYYPQKPLGTTR	801	//17	13//108	2.58875	1.03333	R.RMILTHVDLIEK[2635.36]FLR.Y	YOR210W	1	RPB10	RMILTHVDLIEKFLR	59	362165	376664	394932	374926	1.05336	0.0749969	-0.117003
						-1	0.0941314	JL102921_110821_RPB4_C1_30B.24412.24412.5	N	7.49425	0.177488		//18	19//148	5.63	1.5	R.M[147.04]DTM[147.04]ANILYYPQK[2150.24]PLGTTR.A	YOR151C	1	RPB2	MDTMANILYYPQKPLGTTR	801	1//16	11//97	1.86425	0.846154	R.M[147.04]ILTHVDLIEK[2651.35]FLR.Y	YOR210W	1	RPB10	MILTHVDLIEKFLR	59	811287	709763	886317	692004	1.2808	0.357043	0.165043
						0	3.26331	JL102921_110821_RPB4_C1_30B.24452.24452.5	NP	7.362	0.163764	0.000919	//18	20//154	5.5675	1.28947	R.M[147.04]DTM[147.04]ANILYYPQK[2150.24]PLGTTR.A	YOR151C	1	RPB2	MDTMANILYYPQKPLGTTR	801	1//17	9//104	1.7945	0.714286	R.M[147.04]ILTHVDLIEK[2651.35]FLR.Y	YOR210W	1	RPB10	MILTHVDLIEKFLR	59	781446	663915	853957	644767	1.32444	0.405387	0.213387
						0	-2.58886	JL102921_110821_RPB4_C1_D.27047.27047.5	P	7.1915	0.179875	0.485	//18	22//147	6.72825	1.44737	R.MDTM[147.04]ANILYYPQK[2306.34]PLGTTR.A	YOR151C	1	RPB2	MDTMANILYYPQKPLGTTR	801	//17	6//110	0.46325	0.266667	R.RM[147.04]ILTHVDLIEK[2635.36]FLR.Y	YOR210W	1	RPB10	RMILTHVDLIEKFLR	59	616628	652797	672278	651027	1.03264	0.0463402	-0.14566
						0	6.00706	JL102921_110821_RPB4_C1_100B.27355.27355.6	P	7.1715	0.166257	2.44e-06	//18	18//154	6.525	1.39474	R.M[147.04]DTM[147.04]ANILYYPQK[2150.24]PLGTTR.A	YOR151C	1	RPB2	MDTMANILYYPQKPLGTTR	801	2//17	6//104	0.6465	0.285714	R.M[147.04]ILTHVDLIEK[2651.35]FLR.Y	YOR210W	1	RPB10	MILTHVDLIEKFLR	59	964693	769706	1.05481e+06	740904	1.42368	0.509629	0.317629
						-2	3.8163	JL102921_110821_RPB4_C1.27221.27221.3	N	7.17075	0.237003		//18	12//75	3.95625	0.861111	R.MDTMANILYYPQK[2134.23]PLGTTR.A	YOR151C	1	RPB2	MDTMANILYYPQKPLGTTR	801	//16	11//55	3.2145	1.07692	R.MILTHVDLIEK[2619.35]FLR.Y	YOR210W	1	RPB10	MILTHVDLIEKFLR	59	197328	136829	216013	128804	1.67706	0.745936	0.553936
						-1	3.56375	JL102921_110821_RPB4_C1.23933.23933.5	NP	7.14825	0.165295	0.0735	//18	18//154	5.646	1.18421	R.M[147.04]DTM[147.04]ANILYYPQK[2150.24]PLGTTR.A	YOR151C	1	RPB2	MDTMANILYYPQKPLGTTR	801	1//17	9//104	1.50225	0.785714	R.M[147.04]ILTHVDLIEK[2651.35]FLR.Y	YOR210W	1	RPB10	MILTHVDLIEKFLR	59	730496	601598	798510	581729	1.37265	0.456965	0.264965
						0	2.36835	JL102921_110821_RPB4_C1_D.30316.30316.4	NP	7.0365	0.200233	0.365	//18	16//115	4.6035	0.947368	R.M[147.04]DTMANILYYPQK[2150.24]PLGTTR.A	YOR151C	1	RPB2	MDTMANILYYPQKPLGTTR	801	//17	10//81	2.433	0.928571	R.M[147.04]ILTHVDLIEK[2635.36]FLR.Y	YOR210W	1	RPB10	MILTHVDLIEKFLR	59	374844	304571	409795	293948	1.39411	0.47934	0.28734
						-1	3.76774	JL102921_110821_RPB4_C1_30B.24476.24476.5	N	6.9465	0.173756		//18	20//148	5.3985	1.44444	R.M[147.04]DTM[147.04]ANILYYPQK[2150.22]PLGTTR.A	YOR151C	1	RPB2	MDTMANILYYPQKPLGTTR	801	1//16	8//97	1.548	0.807692	R.M[147.04]ILTHVDLIEK[2651.34]FLR.Y	YOR210W	1	RPB10	MILTHVDLIEKFLR	59	558544	509363	609948	499280	1.22165	0.288836	0.0968356
						0	0.432853	JL102921_110821_RPB4_C1_30B.27481.27481.5	NP	6.872	0.160304	0.000503	1//18	23//147	5.525	1.60526	R.MDTMANILYYPQK[2134.24]PLGTTR.A	YOR151C	1	RPB2	MDTMANILYYPQKPLGTTR	801	2//16	10//97	1.347	0.678571	R.MILTHVDLIEK[2619.36]FLR.Y	YOR210W	1	RPB10	MILTHVDLIEKFLR	59	447371	358685	489143	345508	1.41572	0.501536	0.309536
						-1	3.22685	JL102921_110821_RPB4_C1_30B.25003.25003.5	NP	6.87025	0.159876	0.00573	//18	18//153	5.40775	1.34211	R.M[147.04]DTMANILYYPQK[2150.24]PLGTTR.A	YOR151C	1	RPB2	MDTMANILYYPQKPLGTTR	801	1//17	9//104	1.4625	0.821429	R.M[147.04]ILTHVDLIEK[2635.36]FLR.Y	YOR210W	1	RPB10	MILTHVDLIEKFLR	59	605185	547730	660933	536374	1.23222	0.301264	0.109264
						-2	6.92268	JL102921_110821_RPB4_C1_100B.27326.27326.6	P	6.71075	0.1501	3.05e-07	//18	20//154	5.804	1.39474	R.M[147.04]DTM[147.04]ANILYYPQK[2150.24]PLGTTR.A	YOR151C	1	RPB2	MDTMANILYYPQKPLGTTR	801	2//17	7//104	0.90675	0.5	R.M[147.04]ILTHVDLIEK[2651.35]FLR.Y	YOR210W	1	RPB10	MILTHVDLIEKFLR	59	450022	400891	491554	391783	1.25466	0.327295	0.135295
						0	1.35944	JL102921_110821_RPB4_C1_30B.26645.26645.5	P	6.64475	0.15741	0.00258	//18	24//147	6.24925	1.73684	R.MDTMANILYYPQK[2150.24]PLGTTR.A	YOR151C	1	RPB2	MDTMANILYYPQKPLGTTR	801	//17	6//104	0.3955	0.464286	R.M[147.04]ILTHVDLIEK[2619.36]FLR.Y	YOR210W	1	RPB10	MILTHVDLIEKFLR	59	567389	519759	619579	509758	1.21544	0.281475	0.0894755
						0	4.11364	JL102921_110821_RPB4_C1_D.29863.29863.4	N	6.582	0.189263		//18	15//112	4.24025	1.05556	R.M[147.04]DTM[147.04]ANILYYPQK[2134.26]PLGTTR.A	YOR151C	1	RPB2	MDTMANILYYPQKPLGTTR	801	//16	9//76	2.34175	0.961538	R.MILTHVDLIEK[2651.37]FLR.Y	YOR210W	1	RPB10	MILTHVDLIEKFLR	59	305834	286342	333891	281591	1.18573	0.245772	0.0537716
						0	2.63807	JL102921_110821_RPB4_C1.25001.25001.5	P	6.546	0.134386	0.156	//18	20//154	5.3705	1.21053	R.M[147.04]DTM[147.04]ANILYYPQK[2134.24]PLGTTR.A	YOR151C	1	RPB2	MDTMANILYYPQKPLGTTR	801	//16	7//97	1.1755	0.571429	R.MILTHVDLIEK[2651.35]FLR.Y	YOR210W	1	RPB10	MILTHVDLIEKFLR	59	1.2531e+06	1.0734e+06	1.36927e+06	1.0436e+06	1.31206	0.391837	0.199837
						0	3.8587	JL102921_110821_RPB4_C1.25682.25682.5	NP	6.43675	0.148155	0.0218	//18	19//153	5.44225	1.26316	R.M[147.04]DTMANILYYPQK[2150.24]PLGTTR.A	YOR151C	1	RPB2	MDTMANILYYPQKPLGTTR	801	1//17	7//104	0.9945	0.607143	R.M[147.04]ILTHVDLIEK[2635.36]FLR.Y	YOR210W	1	RPB10	MILTHVDLIEKFLR	59	773291	674391	844834	657244	1.28542	0.362238	0.170238
						0	0.874865	JL102921_110821_RPB4_C1_D.30325.30325.4	NP	6.407	0.181201	0.0239	//18	16//115	5.00575	1	R.M[147.04]DTMANILYYPQK[2150.24]PLGTTR.A	YOR151C	1	RPB2	MDTMANILYYPQKPLGTTR	801	//17	10//81	1.40125	0.821429	R.M[147.04]ILTHVDLIEK[2635.36]FLR.Y	YOR210W	1	RPB10	MILTHVDLIEKFLR	59	387102	344554	422831	336690	1.25584	0.328658	0.136658
						-1	1.31548	JL102921_110821_RPB4_C1_30B.27476.27476.5	P	6.39325	0.152291	0.00248	1//18	22//147	5.34825	1.26316	R.MDTMANILYYPQK[2134.24]PLGTTR.A	YOR151C	1	RPB2	MDTMANILYYPQKPLGTTR	801	1//16	8//97	1.045	0.642857	R.MILTHVDLIEK[2619.36]FLR.Y	YOR210W	1	RPB10	MILTHVDLIEKFLR	59	430840	364716	470834	354022	1.32996	0.411379	0.219379
						0	0.638711	JL102921_110821_RPB4_C1.25591.25591.5	P	6.24475	0.145453	0.0336	//18	21//147	5.07075	1.55263	R.MDTM[147.04]ANILYYPQK[2134.24]PLGTTR.A	YOR151C	1	RPB2	MDTMANILYYPQKPLGTTR	801	//16	10//97	1.174	0.928571	R.MILTHVDLIEK[2635.36]FLR.Y	YOR210W	1	RPB10	MILTHVDLIEKFLR	59	1.04043e+06	823794	1.1377e+06	792076	1.43635	0.522406	0.330406
						0	3.42789	JL102921_110821_RPB4_C1_D.29229.29229.5	P	6.2155	0.145147	0.0369	1//18	20//153	5.16175	1.15789	R.M[147.04]DTMANILYYPQK[2150.24]PLGTTR.A	YOR151C	1	RPB2	MDTMANILYYPQKPLGTTR	801	1//17	8//104	1.05375	0.5	R.M[147.04]ILTHVDLIEK[2635.36]FLR.Y	YOR210W	1	RPB10	MILTHVDLIEKFLR	59	519171	491510	566732	484007	1.17092	0.22764	0.0356396
						0	3.59058	JL102921_110821_RPB4_C1.26589.26589.6	P	6.2155	0.165716	0.59	//18	17//153	5.051	1.13158	R.M[147.04]DTMANILYYPQK[2134.24]PLGTTR.A	YOR151C	1	RPB2	MDTMANILYYPQKPLGTTR	801	3//16	8//97	1.1645	0.5	R.MILTHVDLIEK[2635.36]FLR.Y	YOR210W	1	RPB10	MILTHVDLIEKFLR	59	618988	422227	677684	396332	1.70989	0.773905	0.581905
						0	5.26935	JL102921_110821_RPB4_C1_70B.25065.25065.4	NP	6.199	0.167817	0.247	//18	15//116	3.88725	0.973684	R.M[147.04]DTM[147.04]ANILYYPQK[2150.24]PLGTTR.A	YOR151C	1	RPB2	MDTMANILYYPQKPLGTTR	801	2//17	12//81	2.31175	0.928571	R.M[147.04]ILTHVDLIEK[2651.35]FLR.Y	YOR210W	1	RPB10	MILTHVDLIEKFLR	59	453706	354534	496181	340216	1.45843	0.544416	0.352416
						0	2.44368	JL102921_110821_RPB4_C1_D.30967.30967.4	NP	6.1785	0.186422	0.128	//18	14//111	4.096	0.842105	R.MDTMANILYYPQK[2150.24]PLGTTR.A	YOR151C	1	RPB2	MDTMANILYYPQKPLGTTR	801	//17	9//81	2.0825	0.678571	R.M[147.04]ILTHVDLIEK[2619.36]FLR.Y	YOR210W	1	RPB10	MILTHVDLIEKFLR	59	296353	234414	324062	225355	1.438	0.524069	0.332069
						0	3.07165	JL102921_110821_RPB4_C1.25519.25519.6	P	6.14475	0.14613	0.102	//18	16//147	5.248	1.15789	R.MDTM[147.04]ANILYYPQK[2134.24]PLGTTR.A	YOR151C	1	RPB2	MDTMANILYYPQKPLGTTR	801	2//16	6//97	0.89675	0.392857	R.MILTHVDLIEK[2635.36]FLR.Y	YOR210W	1	RPB10	MILTHVDLIEKFLR	59	618085	422952	676680	397234	1.70348	0.768484	0.576484
						0	0.137335	JL102921_110821_RPB4_C1.25529.25529.4	NP	6.1345	0.153614	0.0101	1//18	15//111	3.932	0.815789	R.MDTM[147.04]ANILYYPQK[2134.24]PLGTTR.A	YOR151C	1	RPB2	MDTMANILYYPQKPLGTTR	801	//16	11//76	2.2025	1	R.MILTHVDLIEK[2635.36]FLR.Y	YOR210W	1	RPB10	MILTHVDLIEKFLR	59	936673	740737	1.02426e+06	712088	1.43839	0.524451	0.332451
						0	2.44054	JL102921_110821_RPB4_C1.25539.25539.5	P	6.065	0.138224	0.0231	//18	20//147	4.7815	1.31579	R.MDTM[147.04]ANILYYPQK[2134.24]PLGTTR.A	YOR151C	1	RPB2	MDTMANILYYPQKPLGTTR	801	//16	10//97	1.2835	0.857143	R.MILTHVDLIEK[2635.36]FLR.Y	YOR210W	1	RPB10	MILTHVDLIEKFLR	59	2.24346e+06	1.64047e+06	2.45486e+06	1.55802e+06	1.57563	0.655926	0.463926
						-2	-4.00131	JL102921_110821_RPB4_C1_D.28778.28778.4	P	5.99325	0.146114	0.0111	//18	18//116	4.52225	1.18421	R.M[147.04]DTM[147.04]ANILYYPQK[2150.24]PLGTTR.A	YOR151C	1	RPB2	MDTMANILYYPQKPLGTTR	801	1//17	11//81	1.471	0.678571	R.M[147.04]ILTHVDLIEK[2651.35]FLR.Y	YOR210W	1	RPB10	MILTHVDLIEKFLR	59	834024	663319	911964	638198	1.42897	0.514973	0.322973
						-1	1.69297	JL102921_110821_RPB4_C1_50B.26234.26234.6	N	5.94575	0.155709		//18	13//112	4.18325	1.02778	R.M[147.04]DTM[147.04]ANILYYPQK[2150.24]PLGTTR.A	YOR151C	1	RPB2	MDTMANILYYPQKPLGTTR	801	1//16	8//76	1.7625	0.730769	R.M[147.04]ILTHVDLIEK[2651.36]FLR.Y	YOR210W	1	RPB10	MILTHVDLIEKFLR	59	364378	285104	398486	273643	1.45623	0.542235	0.350235
						0	1.68784	JL102921_110821_RPB4_C1_D.30230.30230.6	P	5.9335	0.135136	0.000408	//18	17//147	4.637	1.02632	R.MDTM[147.04]ANILYYPQK[2134.24]PLGTTR.A	YOR151C	1	RPB2	MDTMANILYYPQKPLGTTR	801	3//16	8//97	1.2965	0.607143	R.MILTHVDLIEK[2635.36]FLR.Y	YOR210W	1	RPB10	MILTHVDLIEKFLR	59	431951	387538	471782	379081	1.24454	0.315615	0.123615
						0	7.38824	JL102921_110821_RPB4_C1_D.29812.29812.6	P	5.8725	0.139397	0.033	//18	15//154	4.83875	0.973684	R.M[147.04]DTM[147.04]ANILYYPQK[2134.24]PLGTTR.A	YOR151C	1	RPB2	MDTMANILYYPQKPLGTTR	801	1//16	6//97	1.03375	0.5	R.MILTHVDLIEK[2651.35]FLR.Y	YOR210W	1	RPB10	MILTHVDLIEKFLR	59	584961	494525	639270	479937	1.33199	0.41358	0.22158
						0	2.36835	JL102921_110821_RPB4_C1_D.30318.30318.4	NP	5.6605	0.158589	0.171	1//18	17//115	4.16125	0.868421	R.M[147.04]DTMANILYYPQK[2150.24]PLGTTR.A	YOR151C	1	RPB2	MDTMANILYYPQKPLGTTR	801	//17	9//81	1.49925	0.607143	R.M[147.04]ILTHVDLIEK[2635.36]FLR.Y	YOR210W	1	RPB10	MILTHVDLIEKFLR	59	332341	306091	362890	300404	1.20801	0.272629	0.0806294
						0	0.185565	JL102921_110821_RPB4_C1_D.29750.29750.4	P	5.64325	0.149627	0.451	//18	14//116	3.9905	0.868421	R.M[147.04]DTM[147.04]ANILYYPQK[2134.24]PLGTTR.A	YOR151C	1	RPB2	MDTMANILYYPQKPLGTTR	801	1//16	9//76	1.65275	0.892857	R.MILTHVDLIEK[2651.35]FLR.Y	YOR210W	1	RPB10	MILTHVDLIEKFLR	59	381802	332905	417125	324432	1.28571	0.362565	0.170565
						-1	2.36835	JL102921_110821_RPB4_C1_D.29236.29236.4	NP	5.60075	0.141714	0.129	//18	15//115	3.521	0.868421	R.M[147.04]DTMANILYYPQK[2150.24]PLGTTR.A	YOR151C	1	RPB2	MDTMANILYYPQKPLGTTR	801	//17	11//81	2.07975	0.75	R.M[147.04]ILTHVDLIEK[2635.36]FLR.Y	YOR210W	1	RPB10	MILTHVDLIEKFLR	59	303253	278655	331136	273398	1.21119	0.276419	0.0844194
						-1	2.75035	JL102921_110821_RPB4_C1_100B.25375.25375.6	P	5.55025	0.157289	0.0799	//18	17//154	4.904	1.15789	R.M[147.04]DTM[147.04]ANILYYPQK[2306.34]PLGTTR.A	YOR151C	1	RPB2	MDTMANILYYPQKPLGTTR	801	//17	8//110	0.64625	0.4	R.RM[147.04]ILTHVDLIEK[2651.35]FLR.Y	YOR210W	1	RPB10	RMILTHVDLIEKFLR	59	324351	338288	353685	336831	1.05004	0.0704399	-0.12156
						-2	3.76669	JL102921_110821_RPB4_C1_30B.26866.26866.5	P	5.5385	0.123449	0.00473	//18	19//153	4.31125	1.18421	R.M[147.04]DTMANILYYPQK[2134.24]PLGTTR.A	YOR151C	1	RPB2	MDTMANILYYPQKPLGTTR	801	//16	9//97	1.22725	0.892857	R.MILTHVDLIEK[2635.36]FLR.Y	YOR210W	1	RPB10	MILTHVDLIEKFLR	59	541718	448792	592123	434333	1.36329	0.447096	0.255096
						0	3.12025	JL102921_110821_RPB4_C1_70B.25026.25026.5	P	5.45675	0.129226	0.0453	1//18	18//154	3.5505	0.921053	R.M[147.04]DTM[147.04]ANILYYPQK[2150.24]PLGTTR.A	YOR151C	1	RPB2	MDTMANILYYPQKPLGTTR	801	1//17	10//104	1.90625	0.821429	R.M[147.04]ILTHVDLIEK[2651.35]FLR.Y	YOR210W	1	RPB10	MILTHVDLIEKFLR	59	549195	551755	599120	547110	1.09506	0.131013	-0.060987
						-1	3.24776	JL102921_110821_RPB4_C1_D.30162.30162.5	P	5.437	0.127227	0.0868	2//18	18//153	4.18525	1.05263	R.M[147.04]DTMANILYYPQK[2134.24]PLGTTR.A	YOR151C	1	RPB2	MDTMANILYYPQKPLGTTR	801	1//16	10//97	1.25175	0.714286	R.MILTHVDLIEK[2635.36]FLR.Y	YOR210W	1	RPB10	MILTHVDLIEKFLR	59	401033	362617	437979	355056	1.23355	0.302814	0.110814
						-1	5.4702	JL102921_110821_RPB4_C1.24496.24496.4	P	5.4315	0.125511	0.0411	//18	16//111	2.9355	0.894737	R.MDTM[147.04]ANILYYPQK[2150.24]PLGTTR.A	YOR151C	1	RPB2	MDTMANILYYPQKPLGTTR	801	//17	13//81	2.496	1.21429	R.M[147.04]ILTHVDLIEK[2635.36]FLR.Y	YOR210W	1	RPB10	MILTHVDLIEKFLR	59	647722	595364	707277	584156	1.21077	0.275921	0.0839214
						-1	0.559372	JL102921_110821_RPB4_C1_30B.24404.24404.5	P	5.3715	0.128021	0.000891	//18	16//154	3.6375	0.973684	R.M[147.04]DTM[147.04]ANILYYPQK[2150.24]PLGTTR.A	YOR151C	1	RPB2	MDTMANILYYPQKPLGTTR	801	//17	9//104	1.734	0.714286	R.M[147.04]ILTHVDLIEK[2651.35]FLR.Y	YOR210W	1	RPB10	MILTHVDLIEKFLR	59	667958	612608	729389	600909	1.21381	0.279543	0.0875433
						-1	-1.72968	JL102921_110821_RPB4_C1_100B.27614.27614.5	P	5.37	0.134651	0.656	2//18	18//154	3.90925	1	R.M[147.04]DTM[147.04]ANILYYPQK[2150.24]PLGTTR.A	YOR151C	1	RPB2	MDTMANILYYPQKPLGTTR	801	//17	7//104	1.46075	0.5	R.M[147.04]ILTHVDLIEK[2651.35]FLR.Y	YOR210W	1	RPB10	MILTHVDLIEKFLR	59	222296	225619	242476	223975	1.0826	0.114504	-0.0774962
						-1	3.09474	JL102921_110821_RPB4_C1.23319.23319.6	N	5.358	0.154187		//18	13//111	2.78175	1.02778	R.MDTM[147.04]ANILYYPQK[2290.36]PLGTTR.A	YOR151C	1	RPB2	MDTMANILYYPQKPLGTTR	801	1//17	15//84	2.57625	1.17857	R.RMILTHVDLIEK[2635.37]FLR.Y	YOR210W	1	RPB10	RMILTHVDLIEKFLR	59	649099	587481	708891	575302	1.23221	0.301244	0.109244
						-1	1.10422	JL102921_110821_RPB4_C1_70B.25041.25041.4	N	5.2775	0.151884		//18	17//112	3.82225	1.13889	R.M[147.04]DTM[147.04]ANILYYPQK[2150.23]PLGTTR.A	YOR151C	1	RPB2	MDTMANILYYPQKPLGTTR	801	//16	10//76	1.45525	0.653846	R.M[147.04]ILTHVDLIEK[2651.35]FLR.Y	YOR210W	1	RPB10	MILTHVDLIEKFLR	59	269653	226975	294700	220148	1.33864	0.420772	0.228772
						0	2.56314	JL102921_110821_RPB4_C1.24994.24994.6	P	5.03975	0.120663	0.405	//18	15//154	4.41325	0.973684	R.M[147.04]DTM[147.04]ANILYYPQK[2134.24]PLGTTR.A	YOR151C	1	RPB2	MDTMANILYYPQKPLGTTR	801	1//16	6//97	0.6265	0.464286	R.MILTHVDLIEK[2651.35]FLR.Y	YOR210W	1	RPB10	MILTHVDLIEKFLR	59	654475	586284	714836	573377	1.24671	0.318129	0.126129
						0	1.92005	JL102921_110821_RPB4_C1_30B.25499.25499.5	P	4.866	0.13461	0.156	//18	19//154	3.628	1.23684	R.M[147.04]DTM[147.04]ANILYYPQK[2134.24]PLGTTR.A	YOR151C	1	RPB2	MDTMANILYYPQKPLGTTR	801	1//16	8//97	1.238	0.785714	R.MILTHVDLIEK[2651.35]FLR.Y	YOR210W	1	RPB10	MILTHVDLIEKFLR	59	814396	633415	890675	607406	1.46636	0.552238	0.360238
						-3	3.94691	JL102921_110821_RPB4_C1_70B.25243.25243.6	P	4.81475	0.138472	0.11	//18	15//154	4.09	0.973684	R.M[147.04]DTM[147.04]ANILYYPQK[2150.24]PLGTTR.A	YOR151C	1	RPB2	MDTMANILYYPQKPLGTTR	801	1//17	5//104	0.72475	0.25	R.M[147.04]ILTHVDLIEK[2651.35]FLR.Y	YOR210W	1	RPB10	MILTHVDLIEKFLR	59	187124	181397	204214	179132	1.14002	0.189063	-0.00293674
						2125	89.6971	JL102921_110821_RPB4_C1_D.29763.29763.3	P	4.7075	0.110629	0.00301	//18	12//78	3.60475	0.868421	R.M[147.04]DTM[147.04]ANILYYPQK[2134.24]PLGTTR.A	YOR151C	1	RPB2	MDTMANILYYPQKPLGTTR	801	1//16	7//55	1.10275	0.607143	R.MILTHVDLIEK[2651.35]FLR.Y	YOR210W	1	RPB10	MILTHVDLIEKFLR	59	569665	519887	622088	509644	1.22063	0.28763	0.0956296
						-1	5.0219	JL102921_110821_RPB4_C1_D.29219.29219.5	P	4.7035	0.120816	0.0305	1//18	17//147	4.043	0.973684	R.MDTM[147.04]ANILYYPQK[2150.24]PLGTTR.A	YOR151C	1	RPB2	MDTMANILYYPQKPLGTTR	801	//17	7//104	0.6605	0.5	R.M[147.04]ILTHVDLIEK[2635.36]FLR.Y	YOR210W	1	RPB10	MILTHVDLIEKFLR	59	442290	463200	482267	461410	1.0452	0.0637826	-0.128217
						0	-2.60348	JL102921_110821_RPB4_C1_30B.24990.24990.5	P	4.578	0.0994969	0.00648	//18	15//147	4.17675	0.842105	R.MDTM[147.04]ANILYYPQK[2150.24]PLGTTR.A	YOR151C	1	RPB2	MDTMANILYYPQKPLGTTR	801	1//17	7//104	0.40125	0.321429	R.M[147.04]ILTHVDLIEK[2635.36]FLR.Y	YOR210W	1	RPB10	MILTHVDLIEKFLR	59	380370	367129	415130	362358	1.14563	0.196147	0.00414678
						-1	4.65726	JL102921_110821_RPB4_C1_D.30262.30262.6	P	4.576	0.109763	0.0291	//18	14//147	3.45525	0.947368	R.MDTM[147.04]ANILYYPQK[2134.24]PLGTTR.A	YOR151C	1	RPB2	MDTMANILYYPQKPLGTTR	801	2//16	7//97	1.12075	0.464286	R.MILTHVDLIEK[2635.36]FLR.Y	YOR210W	1	RPB10	MILTHVDLIEKFLR	59	276772	320029	301422	322031	0.936002	-0.0954162	-0.287416
						-1	3.53292	JL102921_110821_RPB4_C1_30B.26631.26631.6	P	4.50275	0.107389	0.00821	//18	14//147	3.60775	0.894737	R.MDTMANILYYPQK[2150.24]PLGTTR.A	YOR151C	1	RPB2	MDTMANILYYPQKPLGTTR	801	2//17	7//104	0.895	0.428571	R.M[147.04]ILTHVDLIEK[2619.36]FLR.Y	YOR210W	1	RPB10	MILTHVDLIEKFLR	59	227592	207740	248535	203651	1.2204	0.28735	0.0953496
						-1	3.9428	JL102921_110821_RPB4_C1_30B.26595.26595.4	P	4.44975	0.109763	0.44	//18	15//111	3.0815	0.789474	R.MDTMANILYYPQK[2150.24]PLGTTR.A	YOR151C	1	RPB2	MDTMANILYYPQKPLGTTR	801	//17	9//81	1.36825	0.678571	R.M[147.04]ILTHVDLIEK[2619.36]FLR.Y	YOR210W	1	RPB10	MILTHVDLIEKFLR	59	153971	134765	168210	131402	1.28013	0.356285	0.164285
						0	3.75765	JL102921_110821_RPB4_C1.27231.27231.6	P	4.3645	0.106122	0.0398	//18	16//147	3.7855	0.868421	R.MDTMANILYYPQK[2134.24]PLGTTR.A	YOR151C	1	RPB2	MDTMANILYYPQKPLGTTR	801	2//16	6//97	0.579	0.285714	R.MILTHVDLIEK[2619.36]FLR.Y	YOR210W	1	RPB10	MILTHVDLIEKFLR	59	704542	512031	770969	485811	1.58697	0.666277	0.474277
						0	4.50492	JL102921_110821_RPB4_C1_30B.25488.25488.5	P	4.24075	0.122378	0.000704	//18	22//154	3.51275	1.39474	R.M[147.04]DTM[147.04]ANILYYPQK[2134.24]PLGTTR.A	YOR151C	1	RPB2	MDTMANILYYPQKPLGTTR	801	1//16	7//97	0.728	0.5	R.MILTHVDLIEK[2651.35]FLR.Y	YOR210W	1	RPB10	MILTHVDLIEKFLR	59	1.06848e+06	851664	1.16831e+06	819676	1.42532	0.511291	0.319291
						-1	6.69914	JL102921_110821_RPB4_C1.26586.26586.3	NP	4.14375	0.131237	0.644	//18	12//77	2.42975	0.605263	R.M[147.04]DTMANILYYPQK[2134.24]PLGTTR.A	YOR151C	1	RPB2	MDTMANILYYPQKPLGTTR	801	1//16	10//55	1.714	0.607143	R.MILTHVDLIEK[2635.36]FLR.Y	YOR210W	1	RPB10	MILTHVDLIEKFLR	59	128054	95627.1	140096	91126.8	1.53738	0.620471	0.428471
						0	3.93128	JL102921_110821_RPB4_C1_D.31820.31820.6	P	3.9245	0.107933	0.0632	//18	16//147	3.02875	0.947368	R.MDTMANILYYPQK[2134.24]PLGTTR.A	YOR151C	1	RPB2	MDTMANILYYPQKPLGTTR	801	1//16	7//97	0.89575	0.607143	R.MILTHVDLIEK[2619.36]FLR.Y	YOR210W	1	RPB10	MILTHVDLIEKFLR	59	418405	342716	457384	331143	1.38123	0.465954	0.273954
						-1	3.15657	JL102921_110821_RPB4_C1_D.27638.27638.6	P	3.7345	0.104205	0.062	//18	10//154	2.41125	0.526316	R.M[147.04]DTM[147.04]ANILYYPQK[2290.34]PLGTTR.A	YOR151C	1	RPB2	MDTMANILYYPQKPLGTTR	801	//17	8//108	1.32325	0.566667	R.RMILTHVDLIEK[2651.35]FLR.Y	YOR210W	1	RPB10	RMILTHVDLIEKFLR	59	411746	436244	448901	435098	1.03172	0.0450553	-0.146945
						-1	1.07742	JL102921_110821_RPB4_C1.25540.25540.3	P	3.61925	0.117046	0.146	//18	11//75	1.575	0.394737	R.MDTM[147.04]ANILYYPQK[2134.24]PLGTTR.A	YOR151C	1	RPB2	MDTMANILYYPQKPLGTTR	801	//16	8//55	2.04425	0.571429	R.MILTHVDLIEK[2635.36]FLR.Y	YOR210W	1	RPB10	MILTHVDLIEKFLR	59	141832	111288	155104	106859	1.45148	0.537528	0.345528
						-2	2.78336	JL102921_110821_RPB4_C1.26211.26211.6	P	3.3915	0.0931718	0.56	1//18	15//147	2.75175	0.842105	R.MDTMANILYYPQK[2150.24]PLGTTR.A	YOR151C	1	RPB2	MDTMANILYYPQKPLGTTR	801	1//17	7//104	0.63975	0.392857	R.M[147.04]ILTHVDLIEK[2619.36]FLR.Y	YOR210W	1	RPB10	MILTHVDLIEKFLR	59	214686	179317	234644	173737	1.35057	0.433567	0.241567
						-1	3.71197	JL102921_110821_RPB4_C1.24521.24521.6	P	3.33225	0.0803223	0.0379	//18	13//147	2.4145	0.710526	R.MDTM[147.04]ANILYYPQK[2150.24]PLGTTR.A	YOR151C	1	RPB2	MDTMANILYYPQKPLGTTR	801	2//17	8//104	0.91775	0.535714	R.M[147.04]ILTHVDLIEK[2635.36]FLR.Y	YOR210W	1	RPB10	MILTHVDLIEKFLR	59	569997	476631	622980	461874	1.34881	0.431689	0.239689
						0	-2.75354	JL102921_110821_RPB4_C1.27189.27189.6	P	3.20425	0.0892847	0.412	//18	15//147	2.5605	0.921053	R.MDTMANILYYPQK[2134.24]PLGTTR.A	YOR151C	1	RPB2	MDTMANILYYPQKPLGTTR	801	1//16	6//97	0.64375	0.392857	R.MILTHVDLIEK[2619.36]FLR.Y	YOR210W	1	RPB10	MILTHVDLIEKFLR	59	124961	110387	136505	107762	1.26672	0.341101	0.149101
						-1	1.48043	JL102921_110821_RPB4_C1.24559.24559.6	P	3.06325	0.0805832	0.184	//18	10//153	2.489	0.526316	R.M[147.04]DTMANILYYPQK[2290.34]PLGTTR.A	YOR151C	1	RPB2	MDTMANILYYPQKPLGTTR	801	//17	6//108	0.57425	0.266667	R.RMILTHVDLIEK[2635.36]FLR.Y	YOR210W	1	RPB10	RMILTHVDLIEKFLR	59	628980	662833	685782	660714	1.03794	0.0537244	-0.138276
						-1	1.5437	JL102921_110821_RPB4_C1.26226.26226.6	P	2.8965	0.0793388	0.725	//18	12//147	2.1275	0.631579	R.MDTMANILYYPQK[2150.24]PLGTTR.A	YOR151C	1	RPB2	MDTMANILYYPQKPLGTTR	801	1//17	5//104	0.769	0.357143	R.M[147.04]ILTHVDLIEK[2619.36]FLR.Y	YOR210W	1	RPB10	MILTHVDLIEKFLR	59	284180	224491	310755	215774	1.44019	0.526256	0.334256
						0	1.09838	JL102921_110821_RPB4_C1.24547.24547.6	P	2.26525	0.0585457	0.036	//18	11//153	1.74825	0.631579	R.M[147.04]DTMANILYYPQK[2150.24]PLGTTR.A	YOR151C	1	RPB2	MDTMANILYYPQKPLGTTR	801	1//17	4//104	0.517	0.214286	R.M[147.04]ILTHVDLIEK[2635.36]FLR.Y	YOR210W	1	RPB10	MILTHVDLIEKFLR	59	486588	427734	531564	417294	1.27384	0.349181	0.157181
						2121	-31.9355	JL102921_110821_RPB4_C1_D.29254.29254.3	P	1.8005	0.0522475	0.00941	//18	9//77	0.783	0.394737	R.M[147.04]DTMANILYYPQK[2150.24]PLGTTR.A	YOR151C	1	RPB2	MDTMANILYYPQKPLGTTR	801	1//17	9//58	1.0175	0.678571	R.M[147.04]ILTHVDLIEK[2635.36]FLR.Y	YOR210W	1	RPB10	MILTHVDLIEKFLR	59	399666	352265	436597	343786	1.26997	0.344789	0.152789
						1698	19.1157	JL102921_110821_RPB4_C1_30B.26091.26091.3	P	0.84725	0.0259705	0.578	//18	6//77	0.645	0.368421	R.M[147.04]DTMANILYYPQK[2150.24]PLGTTR.A	YOR151C	1	RPB2	MDTMANILYYPQKPLGTTR	801	//17	3//58	0.20225	0.178571	R.M[147.04]ILTHVDLIEK[2635.36]FLR.Y	YOR210W	1	RPB10	MILTHVDLIEKFLR	59	587990	679362	640364	683561	0.936805	-0.0941786	-0.286179
	4	RPB10:59---RPB2:775	7.038	0.183146	-0.183146
						-2	4.15803	JL102921_110821_RPB4_C1.26678.26678.4	N	7.038	0.160742		//17	19//129	4.972	1.21429	R.NTYQSAMGK[2134.22]QAMGVFLTNYNVR.M	YOR151C	1	RPB2	NTYQSAMGKQAMGVFLTNYNVR	775	//16	10//76	2.066	0.923077	R.MILTHVDLIEK[2899.44]FLR.Y	YOR210W	1	RPB10	MILTHVDLIEKFLR	59	271374	264028	296149	260842	1.13536	0.183146	-0.0088536
	5	RPB10:1---RPB2:606	3.9825	-0.271053	0.271053
						-1	2.80335	JL102921_110821_RPB4_C1_30B.09498.09498.5	P	3.9825	0.160782	0.593	//13	10//90	3.32275	0.923077	R.RK[1120.69]GDINPEVSMIR.D	YOR151C	1	RPB2	RKGDINPEVSMIR	606	1//7	5//34	0.65975	0.583333	-.M[1924.01]IVPVR.C	YOR210W	1	RPB10	MIVPVR	1	832184	1.03907e+06	905366	1.05304e+06	0.85976	-0.217994	-0.409994
						-1	8.5869	JL102921_110821_RPB4_C1_30B.09449.09449.5	P	2.526	0.0810057	0.229	//13	10//90	2.1965	0.692308	R.RK[1120.69]GDINPEVSMIR.D	YOR151C	1	RPB2	RKGDINPEVSMIR	606	2//7	4//34	0.3295	0.5	-.M[1924.01]IVPVR.C	YOR210W	1	RPB10	MIVPVR	1	2.52753e+06	3.37412e+06	2.74714e+06	3.43913e+06	0.79879	-0.324112	-0.516112
	6	RPB10:68---RPB2:813	4.75925	1.49744	-1.49744
						0	6.26975	JL102921_110821_RPB4_C1_D.18086.18086.4	N	4.75925	0.190633		//10	9//37	2.59075	1.57143	R.AMEYLK[1440.8]FR.E	YOR151C	1	RPB2	AMEYLKFR	813	1//11	8//42	2.1685	1.1875	R.YNPLEK[1463.82]RD.*	YOR210W	1	RPB10	YNPLEKRD	68	650332	257609	714262	211155	3.38264	1.75815	1.56615
						0	2.86925	JL102921_110821_RPB4_C1_30B.14113.14113.4	N	4.59475	0.172391		//10	8//37	2.3765	1.5	R.AMEYLK[1440.79]FR.E	YOR151C	1	RPB2	AMEYLKFR	813	1//11	9//42	2.21825	1.25	R.YNPLEK[1463.81]RD.*	YOR210W	1	RPB10	YNPLEKRD	68	1.7035e+06	659656	1.87115e+06	536407	3.48829	1.80252	1.61052
						0	3.47235	JL102921_110821_RPB4_C1.13950.13950.4	NP	4.4165	0.141138	0.616	//10	9//37	2.464	1.5	R.AMEYLK[1440.78]FR.E	YOR151C	1	RPB2	AMEYLKFR	813	1//10	10//37	1.9525	1.0625	R.YNPLEK[1463.8]RD.*	YOR210W	1	RPB10	YNPLEKRD	68	2642986	1167180	2.90134e+06	990832	2.92818	1.55001	1.35801
						0	4.82711	JL102921_110821_RPB4_C1_30B.14376.14376.4	N	4.1625	0.150349		//10	10//37	2.38975	1.85714	R.AMEYLK[1440.79]FR.E	YOR151C	1	RPB2	AMEYLKFR	813	1//11	7//42	1.77275	0.75	R.YNPLEK[1463.82]RD.*	YOR210W	1	RPB10	YNPLEKRD	68	1073681	832915	1.17427e+06	798401	1.47078	0.556581	0.364581
						-1	0.931129	JL102921_110821_RPB4_C1_D.18089.18089.4	N	4.012	0.156161		//10	8//37	1.859	1.28571	R.AMEYLK[1440.78]FR.E	YOR151C	1	RPB2	AMEYLKFR	813	1//11	8//42	2.153	1.1875	R.YNPLEK[1463.81]RD.*	YOR210W	1	RPB10	YNPLEKRD	68	657911	255019	722654	207445	3.48358	1.80057	1.60857
						-1	2.16412	JL102921_110821_RPB4_C1.14087.14087.3	P	2.1465	0.0681634	0.615	1//10	6//29	1.64325	0.875	R.AMEYLK[1440.78]FR.E	YOR151C	1	RPB2	AMEYLKFR	813	2//10	6//29	0.50325	0.4375	R.YNPLEK[1463.8]RD.*	YOR210W	1	RPB10	YNPLEKRD	68	1.01887e+06	489071	1.11799e+06	425137	2.62973	1.39491	1.20291
						0	3.81286	JL102921_110821_RPB4_C1_30B.14131.14131.3	P	1.9475	0.0735017	0.459	//10	5//29	1.44675	0.8125	R.AMEYLK[1440.78]FR.E	YOR151C	1	RPB2	AMEYLKFR	813	1//10	6//29	0.50075	0.5	R.YNPLEK[1463.8]RD.*	YOR210W	1	RPB10	YNPLEKRD	68	1.82396e+06	776511	2.00261e+06	651812	3.07237	1.61935	1.42735
	7	RPB10:68---RPB2:775	10.0307	0.605536	-0.605536
						0	0.416898	JL102921_110821_RPB4_C1_100B.17429.17429.4	N	10.0307	0.373376		//16	27//129	9.12275	1.7381	R.NTYQSAM[147.04]GK[1440.78]QAM[147.04]GVFLTNYNVR.M	YOR151C	1	RPB2	NTYQSAMGKQAMGVFLTNYNVR	775	//11	5//39	0.908	0.625	R.YNPLEK[2931.44]RD.*	YOR210W	1	RPB10	YNPLEKRD	68	392561	295769	429445	282243	1.52154	0.605536	0.413536
	8	RPB10:68---RPB2:191	7.66775	-1.72803	1.72803
						-58	14.388	JL102921_110821_RPB4_C1.14682.14682.3	P	7.66775	0.209888	0.606	//19	15//76	7.4545	1.36111	R.SKNCYLSEATESDLYK[1440.78]LK.E	YOR151C	1	RPB2	SKNCYLSEATESDLYKLK	191	//10	4//26	0.21325	0.25	R.YNPLEK[2498.28]RD.*	YOR210W	1	RPB10	YNPLEKRD	68	273643	901205	290906	963701	0.301863	-1.72803	-1.92003
11	RPB10---RPB3
	1	RPB10:59---RPB3:149	5.7975	0.536447	-0.536447
						0	6.05203	JL102921_110821_RPB4_C1_100B.23000.23000.4	P	5.7975	0.20732	0.0084	//17	15//85	5.1395	1.46429	R.M[147.04]ILTHVDLIEK[1108.67]FLR.Y	YOR210W	1	RPB10	MILTHVDLIEKFLR	59	//7	6//26	0.658	0.916667	R.K[2150.24]GQELK.L	YIL021W	1	RPB3	KGQELK	149	516030	392793	564467	375428	1.50353	0.588355	0.396355
						-1	9.90657	JL102921_110821_RPB4_C1_100B.22973.22973.4	NP	4.63625	0.164651	0.0461	//17	15//85	4.251	1.25	R.M[147.04]ILTHVDLIEK[1108.67]FLR.Y	YOR210W	1	RPB10	MILTHVDLIEKFLR	59	//7	5//26	0.38525	0.583333	R.K[2150.24]GQELK.L	YIL021W	1	RPB3	KGQELK	149	467834	378942	511470	365561	1.39914	0.484539	0.292539
	2	RPB10:68---RPB3:154	4.0425	0.574898	-0.574898
						-1	0.481532	JL102921_110821_RPB4_C1_D.14958.14958.5	N	4.0425	0.179539		//13	14//96	2.5875	1.25	R.K[1440.78]GQELK[425.27]LTC[160.03]VAK.K	YIL021W	1	RPB3	KGQELKLTCVAK	154	//11	5//48	1.455	0.625	R.YNPLEK[2078.21]RD.*	YOR210W	1	RPB10	YNPLEKRD	68	613364	444364	671211	421392	1.59284	0.671605	0.479605
						0	3.71829	JL102921_110821_RPB4_C1_D.14920.14920.5	N	3.8245	0.151381		//13	13//96	1.798	1.08333	R.K[1440.79]GQELK[425.27]LTC[160.03]VAK.K	YIL021W	1	RPB3	KGQELKLTCVAK	154	//11	8//48	2.0265	1.0625	R.YNPLEK[2078.22]RD.*	YOR210W	1	RPB10	YNPLEKRD	68	526142	427800	575196	412920	1.393	0.478192	0.286192
	3	RPB10:68---RPB3:149	4.91325	0.356863	-0.356863
						0	5.09166	JL102921_110821_RPB4_C1_30B.09849.09849.5	N	4.91325	0.16218		1//13	13//85	2.93825	1.45833	R.K[1440.79]GQELKLTC[160.03]VAK.K	YIL021W	1	RPB3	KGQELKLTCVAK	149	//11	9//48	1.975	1.1875	R.YNPLEK[1781.05]RD.*	YOR210W	1	RPB10	YNPLEKRD	68	1.60377e+06	1.8244e+06	1.74697e+06	1.8329e+06	0.95312	-0.0692703	-0.26127
						0	1.30851	JL102921_110821_RPB4_C1_70B.07774.07774.3	P	4.36875	0.156794	0.541	//10	6//32	0.66725	0.6875	R.YNPLEK[1108.67]RD.*	YOR210W	1	RPB10	YNPLEKRD	68	//7	9//24	3.7015	2.33333	R.K[1440.78]GQELK.L	YIL021W	1	RPB3	KGQELK	149	1.24111e+06	987954	1.35709e+06	950661	1.42752	0.51351	0.32151
						0	3.12675	JL102921_110821_RPB4_C1.06646.06646.3	P	3.427	0.096591	0.0437	//10	5//32	0.4755	0.4375	R.YNPLEK[1108.67]RD.*	YOR210W	1	RPB10	YNPLEKRD	68	1//7	8//24	2.9515	1.75	R.K[1440.78]GQELK.L	YIL021W	1	RPB3	KGQELK	149	5162741	3.84195e+06	5.64841e+06	3.65911e+06	1.54366	0.62635	0.43435
	4	RPB10:17---RPB3:15	12.303	0.319126	-0.319126
						-2	8.08575	JL102921_110821_RPB4_C1.33157.33157.5	N	12.303	0.359311		1//13	15//207	5.45175	0.72	K.VVGDK[2928.56]WESYLNLLQEDELDEGTALSR.L	YOR210W	1	RPB10	VVGDKWESYLNLLQEDELDEGTALSR	17	//16	15//183	6.85125	0.977273	R.EASK[3385.76]DNVDFILSNVDLAMANSLR.R	YIL021W	1	RPB3	EASKDNVDFILSNVDLAMANSLR	15	170688	152811	186432	149435	1.24757	0.319126	0.127126
	5	RPB10:17---RPB3:137	14.5122	0.720952	-0.720952
						-1	3.0022	JL102921_110821_RPB4_C1.24332.24332.5	N	14.5122	0.385359		//13	27//207	11.5325	1.6	K.VVGDK[2511.39]WESYLNLLQEDELDEGTALSR.L	YOR210W	1	RPB10	VVGDKWESYLNLLQEDELDEGTALSR	17	//20	17//149	2.97975	1.30556	R.NIGHPIIQDK[3385.73]EGNGVLIC[160.03]K.L	YIL021W	1	RPB3	NIGHPIIQDKEGNGVLICK	137	441040	287839	483021	268042	1.80203	0.849623	0.657623
						-2	2.28228	JL102921_110821_RPB4_C1.24359.24359.5	N	13.5808	0.366423		//13	26//207	10.46	1.5	K.VVGDK[2511.38]WESYLNLLQEDELDEGTALSR.L	YOR210W	1	RPB10	VVGDKWESYLNLLQEDELDEGTALSR	17	//20	17//149	3.12075	1.13889	R.NIGHPIIQDK[3385.72]EGNGVLIC[160.03]K.L	YIL021W	1	RPB3	NIGHPIIQDKEGNGVLICK	137	390945	264664	428041	248102	1.72526	0.786818	0.594818
						-3	6.31926	JL102921_110821_RPB4_C1_30B.24978.24978.4	N	12.2022	0.369396		1//13	24//151	9.73975	1.56	K.VVGDK[2511.34]WESYLNLLQEDELDEGTALSR.L	YOR210W	1	RPB10	VVGDKWESYLNLLQEDELDEGTALSR	17	//20	13//113	2.4625	0.694444	R.NIGHPIIQDK[3385.68]EGNGVLIC[160.03]K.L	YIL021W	1	RPB3	NIGHPIIQDKEGNGVLICK	137	63917.2	44207.2	69970.9	41596.2	1.68215	0.750302	0.558302
						-58	4.86542	JL102921_110821_RPB4_C1.25068.25068.5	NP	8.2945	0.222561	0.033	1//13	17//207	7.0985	1	K.VVGDK[2454.35]WESYLNLLQEDELDEGTALSR.L	YOR210W	1	RPB10	VVGDKWESYLNLLQEDELDEGTALSR	17	1//20	13//146	1.196	0.552632	R.NIGHPIIQDK[3385.71]EGNGVLICK.L	YIL021W	1	RPB3	NIGHPIIQDKEGNGVLICK	137	514828	377999	563322	359237	1.5681	0.649021	0.457021
						-1	2.80229	JL102921_110821_RPB4_C1_30B.25708.25708.5	N	8.107	0.204338		//13	19//207	6.253	1.12	K.VVGDK[2511.36]WESYLNLLQEDELDEGTALSR.L	YOR210W	1	RPB10	VVGDKWESYLNLLQEDELDEGTALSR	17	//20	12//149	1.854	0.694444	R.NIGHPIIQDK[3385.7]EGNGVLIC[160.03]K.L	YIL021W	1	RPB3	NIGHPIIQDKEGNGVLICK	137	170023	130680	185967	125089	1.48668	0.572094	0.380094
						-60	1.74984	JL102921_110821_RPB4_C1_30B.24964.24964.4	P	8.0935	0.25939	0.46	//13	15//151	7.033	0.884615	K.VVGDK[2454.35]WESYLNLLQEDELDEGTALSR.L	YOR210W	1	RPB10	VVGDKWESYLNLLQEDELDEGTALSR	17	//20	10//111	1.0605	0.315789	R.NIGHPIIQDK[3385.71]EGNGVLICK.L	YIL021W	1	RPB3	NIGHPIIQDKEGNGVLICK	137	73749.6	44181.2	80817.5	40462	1.99736	0.998097	0.806097
						-58	9.23765	JL102921_110821_RPB4_C1.24810.24810.5	P	4.124	0.0961933	0.585	1//13	17//207	3.343	0.673077	K.VVGDK[2454.35]WESYLNLLQEDELDEGTALSR.L	YOR210W	1	RPB10	VVGDKWESYLNLLQEDELDEGTALSR	17	1//20	12//146	0.781	0.315789	R.NIGHPIIQDK[3385.71]EGNGVLICK.L	YIL021W	1	RPB3	NIGHPIIQDKEGNGVLICK	137	378287	314606	413471	304634	1.35727	0.440708	0.248708
12	RPB11---RPB2
	1	RPB11:55---RPB2:934	5.90025	-0.273672	0.273672
						0	1.08277	JL102921_110821_RPB4_C1_70B.07744.07744.4	NP	5.90025	0.195921	0.000171	//9	11//43	4.68325	1.875	R.K[1268.71]VLFAAYK.V	YOL005C	1	RPB11	KVLFAAYK	55	//9	6//33	1.217	0.928571	R.TAYHSK[1345.82]R.D	YOR151C	1	RPB2	TAYHSKR	934	1.07975e+06	1.48353e+06	1.17306e+06	1.51566e+06	0.773963	-0.369663	-0.561663
						0	0.0399546	JL102921_110821_RPB4_C1_50B.07199.07199.4	N	4.98925	0.174526		//9	10//43	4.00175	1.8125	R.K[1268.71]VLFAAYK.V	YOL005C	1	RPB11	KVLFAAYK	55	//9	5//33	0.9875	0.833333	R.TAYHSK[1345.82]R.D	YOR151C	1	RPB2	TAYHSKR	934	1.7095e+06	2.3597e+06	1.8571e+06	2.4117e+06	0.770038	-0.376999	-0.568999
						-2	3.9027	JL102921_110821_RPB4_C1_70B.07736.07736.4	N	4.763	0.154442		1//9	11//43	3.7745	1.6875	R.K[1268.7]VLFAAYK.V	YOL005C	1	RPB11	KVLFAAYK	55	//9	5//33	0.9885	0.833333	R.TAYHSK[1345.81]R.D	YOR151C	1	RPB2	TAYHSKR	934	959738	1.09524e+06	1.04539e+06	1.10068e+06	0.949767	-0.0743538	-0.266354
	2	RPB11:55---RPB2:606	11.3232	-0.262969	0.262969
						-2	7.63417	JL102921_110821_RPB4_C1_50B.18059.18059.5	N	11.3232	0.34099		1//17	25//126	10.1455	2.46875	R.K[1937.03]VLFAAYKVEHPFFAR.F	YOL005C	1	RPB11	KVLFAAYKVEHPFFAR	55	//13	9//83	1.17775	0.875	R.RK[2329.29]GDINPEVSM[147.04]IR.D	YOR151C	1	RPB2	RKGDINPEVSMIR	606	727828	934858	791516	949776	0.833371	-0.262969	-0.454969
	3	RPB11:72---RPB2:801	5.12725	-0.169151	0.169151
						1	-3.97487	JL102921_110821_RPB4_C1.29101.29101.5	P	5.12725	0.120661	0.663	//18	19//147	4.99975	1.23684	R.MDTMANILYYPQK[1953.12]PLGTTR.A	YOR151C	1	RPB2	MDTMANILYYPQKPLGTTR	801	//14	3//77	0.1275	0.125	K.VEHPFFARFK[2619.36]LR.I	YOL005C	1	RPB11	VEHPFFARFKLR	72	154304	186848	167944	188836	0.889366	-0.169151	-0.361151
13	RPB11---RPB3
	1	RPB11:37---RPB3:253	10.7918	-0.211399	0.211399
						-1	9.08858	JL102921_110821_RPB4_C1_30B.20410.20410.5	P	10.7918	0.283986	0.613	//8	42//231	10.204	1.62069	K.LKIDPDTKAPNAVVITFEK[1308.78]EDHTLGNLIR.A	YOL005C	1	RPB11	LKIDPDTKAPNAVVITFEKEDHTLGNLIR	37	//10	4//41	0.58775	0.5625	R.GIDTLQK[3654.02]K.V	YIL021W	1	RPB3	GIDTLQKK	253	440790	533454	479758	539103	0.88992	-0.168253	-0.360253
						0	2.41334	JL102921_110821_RPB4_C1_30B.20397.20397.6	P	9.53975	0.269992	0.11	//8	35//231	8.68425	1.2931	K.LKIDPDTKAPNAVVITFEK[1308.78]EDHTLGNLIR.A	YOL005C	1	RPB11	LKIDPDTKAPNAVVITFEKEDHTLGNLIR	37	//10	6//41	0.8555	0.875	R.GIDTLQK[3654.02]K.V	YIL021W	1	RPB3	GIDTLQKK	253	341412	440676	371261	447896	0.8289	-0.270731	-0.462731
						0	-18.1465	JL102921_110821_RPB4_C1_30B.20526.20526.4	P	8.26575	0.210882	0.632	1//17	21//120	7.5815	1.40476	K.APNAVVITFEK[1308.78]EDHTLGNLIR.A	YOL005C	1	RPB11	APNAVVITFEKEDHTLGNLIR	37	1//10	7//33	0.68425	0.9375	R.GIDTLQK[2743.51]K.V	YIL021W	1	RPB3	GIDTLQKK	253	338925	426445	368691	432472	0.852519	-0.230195	-0.422195
						-1	6.33145	JL102921_110821_RPB4_C1.20359.20359.5	P	6.9245	0.240794	0.591	//8	25//231	6.1215	0.862069	K.LKIDPDTKAPNAVVITFEK[1308.78]EDHTLGNLIR.A	YOL005C	1	RPB11	LKIDPDTKAPNAVVITFEKEDHTLGNLIR	37	//10	4//41	0.803	0.75	R.GIDTLQK[3654.02]K.V	YIL021W	1	RPB3	GIDTLQKK	253	260548	316940	283563	320446	0.884899	-0.176416	-0.368416
	2	RPB11:37---RPB3:165	12.2825	0.00432823	-0.00432823
						0	4.35723	JL102921_110821_RPB4_C1_70B.16240.16240.5	NP	12.2825	0.359637	0.676	//17	32//160	10.8707	2.19048	K.APNAVVITFEK[1387.84]EDHTLGNLIR.A	YOL005C	1	RPB11	APNAVVITFEKEDHTLGNLIR	37	//11	10//47	1.41175	1.27778	K.KGIAK[2743.51]EHAK.W	YIL021W	1	RPB3	KGIAKEHAK	165	2.18971e+06	1782138	2.39384e+06	1.72039e+06	1.39146	0.476595	0.284595
						0	1.84745	JL102921_110821_RPB4_C1_D.20160.20160.7	P	12.1605	0.364583	0.0175	//8	34//231	11.6962	1.72414	K.LKIDPDTKAPNAVVITFEK[1387.84]EDHTLGNLIR.A	YOL005C	1	RPB11	LKIDPDTKAPNAVVITFEKEDHTLGNLIR	37	//11	4//47	0.46425	0.333333	K.KGIAK[3654.02]EHAK.W	YIL021W	1	RPB3	KGIAKEHAK	165	509437	591482	554779	595419	0.931746	-0.101992	-0.293992
						-1	2.67656	JL102921_110821_RPB4_C1.16573.16573.6	P	11.565	0.299452	0.6	//8	33//231	10.6692	1.53448	K.LKIDPDTKAPNAVVITFEK[1387.84]EDHTLGNLIR.A	YOL005C	1	RPB11	LKIDPDTKAPNAVVITFEKEDHTLGNLIR	37	1//11	7//47	0.89575	0.833333	K.KGIAK[3654.02]EHAK.W	YIL021W	1	RPB3	KGIAKEHAK	165	1.14362e+06	1330514	1.24537e+06	1.33963e+06	0.92964	-0.105256	-0.297256
						0	3.42371	JL102921_110821_RPB4_C1_100B.18900.18900.5	NP	9.93625	0.303991	0.0188	//17	31//160	8.854	2.09524	K.APNAVVITFEK[1387.84]EDHTLGNLIR.A	YOL005C	1	RPB11	APNAVVITFEKEDHTLGNLIR	37	//11	10//47	1.08225	1.11111	K.KGIAK[2743.51]EHAK.W	YIL021W	1	RPB3	KGIAKEHAK	165	1.86729e+06	1.29937e+06	2.04404e+06	1.22391e+06	1.6701	0.739934	0.547934
						0	2.03868	JL102921_110821_RPB4_C1_50B.18540.18540.5	N	9.8565	0.307023		//17	26//160	8.722	1.775	K.APNAVVITFEK[1259.75]EDHTLGNLIR.A	YOL005C	1	RPB11	APNAVVITFEKEDHTLGNLIR	37	//10	7//40	1.1345	1.21429	K.GIAK[2743.52]EHAK.W	YIL021W	1	RPB3	GIAKEHAK	165	872862	875146	952232	867580	1.09757	0.134317	-0.0576834
						-2	5.53136	JL102921_110821_RPB4_C1_100B.19792.19792.7	P	9.63325	0.258809	0.0819	//8	33//231	8.784	1.39655	K.LKIDPDTKAPNAVVITFEK[1387.84]EDHTLGNLIR.A	YOL005C	1	RPB11	LKIDPDTKAPNAVVITFEKEDHTLGNLIR	37	1//11	7//47	0.84925	0.777778	K.KGIAK[3654.02]EHAK.W	YIL021W	1	RPB3	KGIAKEHAK	165	578224	593993	630629	590456	1.06804	0.0949616	-0.0970384
						0	-1.25114	JL102921_110821_RPB4_C1_D.20181.20181.6	P	7.7855	0.222034	0.662	//8	32//231	7.51475	1.17241	K.LKIDPDTKAPNAVVITFEK[1387.84]EDHTLGNLIR.A	YOL005C	1	RPB11	LKIDPDTKAPNAVVITFEKEDHTLGNLIR	37	//11	4//47	0.27075	0.333333	K.KGIAK[3654.02]EHAK.W	YIL021W	1	RPB3	KGIAKEHAK	165	1.07374e+06	1.24063e+06	1.16938e+06	1.2483e+06	0.936773	-0.0942282	-0.286228
						0	8.08762	JL102921_110821_RPB4_C1_100B.18923.18923.6	NP	7.625	0.235521	0.0611	//17	17//160	6.39875	1.19048	K.APNAVVITFEK[1387.84]EDHTLGNLIR.A	YOL005C	1	RPB11	APNAVVITFEKEDHTLGNLIR	37	1//11	9//47	1.22625	0.944444	K.KGIAK[2743.51]EHAK.W	YIL021W	1	RPB3	KGIAKEHAK	165	681106	639520	743567	629128	1.1819	0.241109	0.049109
						-1	8.98961	JL102921_110821_RPB4_C1_50B.16691.16691.5	N	6.71725	0.197456		//17	25//160	5.69325	1.5	K.APNAVVITFEK[1387.87]EDHTLGNLIR.A	YOL005C	1	RPB11	APNAVVITFEKEDHTLGNLIR	37	//11	8//47	1.024	1.3125	K.KGIAK[2743.54]EHAK.W	YIL021W	1	RPB3	KGIAKEHAK	165	1.72064e+06	2914207	1.86264e+06	3.02234e+06	0.616292	-0.698314	-0.890314
						0	2.3104	JL102921_110821_RPB4_C1_30B.17630.17630.5	N	6.69975	0.170779		//11	31//213	5.72925	1.05769	K.IDPDTKAPNAVVITFEK[1259.73]EDHTLGNLIR.A	YOL005C	1	RPB11	IDPDTKAPNAVVITFEKEDHTLGNLIR	37	1//10	7//40	0.9705	1.28571	K.GIAK[3412.83]EHAK.W	YIL021W	1	RPB3	GIAKEHAK	165	575136	640300	626659	641903	0.976253	-0.0346734	-0.226673
						-1	3.7425	JL102921_110821_RPB4_C1_70B.16306.16306.6	P	6.41475	0.189567	0.72	//17	20//160	6.01775	1.2381	K.APNAVVITFEK[1387.84]EDHTLGNLIR.A	YOL005C	1	RPB11	APNAVVITFEKEDHTLGNLIR	37	1//11	7//47	0.397	0.5	K.KGIAK[2743.51]EHAK.W	YIL021W	1	RPB3	KGIAKEHAK	165	1.08245e+06	1.21653e+06	1.17929e+06	1.22072e+06	0.966054	-0.0498245	-0.241824
						-2	4.55349	JL102921_110821_RPB4_C1_50B.16684.16684.5	N	5.336	0.166784		//17	26//160	4.37825	1.6	K.APNAVVITFEK[1387.82]EDHTLGNLIR.A	YOL005C	1	RPB11	APNAVVITFEKEDHTLGNLIR	37	//11	10//47	0.95775	1.125	K.KGIAK[2743.49]EHAK.W	YIL021W	1	RPB3	KGIAKEHAK	165	1.49196e+06	2.29957e+06	1.61786e+06	2.36981e+06	0.682694	-0.550689	-0.742689
	3	RPB11:37---RPB3:161	8.03425	0.160067	-0.160067
						-2	1.0784	JL102921_110821_RPB4_C1.16548.16548.6	P	8.03425	0.204065	0.476	//8	27//231	7.85525	1.31034	K.LKIDPDTKAPNAVVITFEK[1387.84]EDHTLGNLIR.A	YOL005C	1	RPB11	LKIDPDTKAPNAVVITFEKEDHTLGNLIR	37	1//10	5//51	0.179	0.277778	K.K[3654.02]GIAKEHAK.W	YIL021W	1	RPB3	KGIAKEHAK	161	1.08322e+06	1.33242e+06	1.17872e+06	1.34853e+06	0.874082	-0.19416	-0.38616
						0	0.134986	JL102921_110821_RPB4_C1_50B.17849.17849.5	N	7.99575	0.206715		//11	30//213	7.071	1.34615	K.IDPDTKAPNAVVITFEK[1387.84]EDHTLGNLIR.A	YOL005C	1	RPB11	IDPDTKAPNAVVITFEKEDHTLGNLIR	37	1//10	5//51	0.92475	0.722222	K.K[3412.84]GIAKEHAK.W	YIL021W	1	RPB3	KGIAKEHAK	161	516097	479439	563488	471032	1.19628	0.258558	0.0665576
						-1	5.88111	JL102921_110821_RPB4_C1_100B.18871.18871.6	P	7.48725	0.230225	0.00377	//17	20//160	6.986	1.30952	K.APNAVVITFEK[1387.84]EDHTLGNLIR.A	YOL005C	1	RPB11	APNAVVITFEKEDHTLGNLIR	37	2//10	9//51	0.50125	0.5	K.K[2743.51]GIAKEHAK.W	YIL021W	1	RPB3	KGIAKEHAK	161	647675	642377	706654	636039	1.11102	0.151887	-0.0401127
						-1	0.180986	JL102921_110821_RPB4_C1_100B.19793.19793.5	N	6.51775	0.17503		//11	25//213	5.4465	1.07692	K.IDPDTKAPNAVVITFEK[1387.84]EDHTLGNLIR.A	YOL005C	1	RPB11	IDPDTKAPNAVVITFEKEDHTLGNLIR	37	//10	7//51	1.07125	0.833333	K.K[3412.84]GIAKEHAK.W	YIL021W	1	RPB3	KGIAKEHAK	161	468721	393772	512268	381826	1.34163	0.423985	0.231985
	4	RPB11:102---RPB3:253	12.6822	0.334457	-0.334457
						-2	3.53121	JL102921_110821_RPB4_C1.25602.25602.3	NP	12.6822	0.295451	0.346	//14	24//90	11.6	1.73913	K.LGALK[1308.78]TNFETEWNLQTLAADDAF.*	YOL005C	1	RPB11	LGALKTNFETEWNLQTLAADDAF	102	//10	6//25	1.08225	1.0625	R.GIDTLQK[2974.52]K.V	YIL021W	1	RPB3	GIDTLQKK	253	236660	206958	258548	201769	1.2814	0.357726	0.165726
						-2	1.01767	JL102921_110821_RPB4_C1.25550.25550.3	N	11.0635	0.255535		//14	23//93	10.092	1.65217	K.LGALK[1308.78]TNFETEWNLQTLAADDAF.*	YOL005C	1	RPB11	LGALKTNFETEWNLQTLAADDAF	102	1//10	7//25	0.9715	1.28571	R.GIDTLQK[2974.51]K.V	YIL021W	1	RPB3	GIDTLQKK	253	170859	155064	186592	151903	1.22837	0.296742	0.104742
						0	1.12104	JL102921_110821_RPB4_C1.25535.25535.3	P	10.251	0.242398	0.708	//14	21//90	9.779	1.3913	K.LGALK[1308.78]TNFETEWNLQTLAADDAF.*	YOL005C	1	RPB11	LGALKTNFETEWNLQTLAADDAF	102	//10	5//25	0.472	0.625	R.GIDTLQK[2974.52]K.V	YIL021W	1	RPB3	GIDTLQKK	253	156166	138269	170589	135021	1.26342	0.337336	0.145336
						-4	0.371927	JL102921_110821_RPB4_C1.25643.25643.3	P	8.187	0.190338	0.652	//14	20//90	7.2845	1.26087	K.LGALK[1308.78]TNFETEWNLQTLAADDAF.*	YOL005C	1	RPB11	LGALKTNFETEWNLQTLAADDAF	102	//10	6//25	0.9025	1.0625	R.GIDTLQK[2974.52]K.V	YIL021W	1	RPB3	GIDTLQKK	253	182628	160847	199505	156961	1.27105	0.346022	0.154022
	5	RPB11:72---RPB3:15	10.0412	0.0584314	-0.0584314
						-4	-0.889003	JL102921_110821_RPB4_C1_D.24684.24684.7	P	10.0412	0.260463	0.715	//16	24//196	9.7955	1.3125	R.E[111.03]ASK[2529.4]DNVDFILSNVDLAM[147.04]ANSLRR.V	YIL021W	1	RPB3	EASKDNVDFILSNVDLAMANSLRR	15	//17	5//137	0.24575	0.138889	R.FK[3082.6]LRIQTTEGYDPKDALK.N	YOL005C	1	RPB11	FKLRIQTTEGYDPKDALK	72	375683	394751	409625	393366	1.04133	0.0584314	-0.133569
14	RPB11---RPB5
	1	RPB11:55---RPB5:171	7.31875	-0.525012	0.525012
						-1	4.59408	JL102921_110821_RPB4_C1_100B.17177.17177.6	N	7.31875	0.277493		1//17	19//102	6.17125	1.84375	R.K[1376.84]VLFAAYKVEHPFFAR.F	YOL005C	1	RPB11	KVLFAAYKVEHPFFAR	55	//8	5//32	1.1475	0.857143	R.LK[2329.33]ESQLPR.I	YBR154C	1	RPB5	LKESQLPR	171	188991	286570	204996	294978	0.694953	-0.525012	-0.717012
15	RPB12---RPB2
	1	RPB12:58---RPB2:886	3.941	0.107028	-0.107028
						-1	16.2423	JL102921_110821_RPB4_C1_100B.12762.12762.5	N	3.941	0.154473		//18	9//161	2.23175	0.605263	R.MK[1119.71]HGTYDKLDDDGLIAPGVR.V	YOR151C	1	RPB2	MKHGTYDKLDDDGLIAPGVR	886	//8	6//29	1.70925	1.3	R.ILLK[2607.3]AR.T	YHR143W-A	1	RPB12	ILLKAR	58	425393	433748	463986	430810	1.07701	0.107028	-0.0849716
	2	RPB12:37---RPB2:606	6.93875	-0.372327	0.372327
						-2	9.91974	JL102921_110821_RPB4_C1_D.20081.20081.6	N	6.93875	0.194162		1//11	16//108	4.00375	1.02778	R.TATLK[1921.11]YIC[160.03]AEC[160.03]SSK[425.27]LSLSR.T	YHR143W-A	1	RPB12	TATLKYICAECSSKLSLSR	37	//13	8//66	2.935	0.916667	R.RK[2891.58]GDINPEVSMIR.D	YOR151C	1	RPB2	RKGDINPEVSMIR	606	970762	1.33603e+06	1.05462e+06	1.36515e+06	0.772535	-0.372327	-0.564327
16	RPB12---RPB3
	1	RPB12:37---RPB3:149	7.98325	-0.280818	0.280818
						0	4.9041	JL102921_110821_RPB4_C1_30B.09000.09000.3	N	7.98325	0.265057		1//16	15//57	5.48575	1.61538	K.YIC[160.03]AEC[160.03]SSK[1108.68]LSLSR.T	YHR143W-A	1	RPB12	YICAECSSKLSLSR	37	//7	8//19	2.4975	2	R.K[2080.07]GQELK.L	YIL021W	1	RPB3	KGQELK	149	807538	959103	879151	967568	0.908619	-0.138252	-0.330252
						0	1.38467	JL102921_110821_RPB4_C1_30B.09009.09009.3	N	7.79475	0.25493		1//16	15//57	5.05025	1.61538	K.YIC[160.03]AEC[160.03]SSK[1108.67]LSLSR.T	YHR143W-A	1	RPB12	YICAECSSKLSLSR	37	//7	9//19	2.7445	2.33333	R.K[2080.06]GQELK.L	YIL021W	1	RPB3	KGQELK	149	961816	1.07572e+06	1.04792e+06	1.07891e+06	0.971278	-0.0420436	-0.234044
						0	4.35203	JL102921_110821_RPB4_C1_D.12562.12562.3	N	6.97775	0.244816		1//16	14//57	5.0035	1.46154	K.YIC[160.03]AEC[160.03]SSK[1108.68]LSLSR.T	YHR143W-A	1	RPB12	YICAECSSKLSLSR	37	//7	7//19	1.97425	1.41667	R.K[2080.06]GQELK.L	YIL021W	1	RPB3	KGQELK	149	412257	631142	447096	650107	0.687726	-0.540094	-0.732094
						-1	3.02965	JL102921_110821_RPB4_C1_50B.14346.14346.4	N	5.95575	0.162417		1//12	22//113	3.49025	1.08333	R.TATLK[425.27]YIC[160.03]AEC[160.03]SSK[1108.66]LSLSR.T	YHR143W-A	1	RPB12	TATLKYICAECSSKLSLSR	37	//7	8//26	2.4655	2	R.K[2891.53]GQELK.L	YIL021W	1	RPB3	KGQELK	149	602600	732894	655830	740991	0.885071	-0.176135	-0.368135
						-1	0.483384	JL102921_110821_RPB4_C1_100B.12315.12315.3	N	5.84325	0.188531		//16	11//57	3.28025	1.11538	K.YIC[160.03]AEC[160.03]SSK[1108.67]LSLSR.T	YHR143W-A	1	RPB12	YICAECSSKLSLSR	37	//7	8//19	2.563	2	R.K[2080.05]GQELK.L	YIL021W	1	RPB3	KGQELK	149	247071	373282	268011	384134	0.697701	-0.519318	-0.711318
						-2	2.97064	JL102921_110821_RPB4_C1_D.12552.12552.3	N	5.8365	0.180655		//16	10//57	3.2965	1.07692	K.YIC[160.03]AEC[160.03]SSK[1108.66]LSLSR.T	YHR143W-A	1	RPB12	YICAECSSKLSLSR	37	//7	8//19	2.54	1.75	R.K[2080.04]GQELK.L	YIL021W	1	RPB3	KGQELK	149	309392	512453	335066	530700	0.631366	-0.663452	-0.855452
						-1	1.40817	JL102921_110821_RPB4_C1_100B.16401.16401.4	N	5.137	0.166951		//12	19//113	3.577	0.972222	R.TATLK[425.27]YIC[160.03]AEC[160.03]SSK[1108.67]LSLSR.T	YHR143W-A	1	RPB12	TATLKYICAECSSKLSLSR	37	//7	5//26	1.56	1	R.K[2891.55]GQELK.L	YIL021W	1	RPB3	KGQELK	149	636840	646732	694648	642063	1.0819	0.113566	-0.0784342
17	RPB2---RPB3
	1	RPB2:775---RPB3:149	10.7643	0.0649674	-0.0649674
						0	0.667018	JL102921_110821_RPB4_C1_30B.16165.16165.3	N	10.7643	0.28305		//17	26//87	9.84025	1.71429	R.NTYQSAMGK[1108.67]QAMGVFLTNYNVR.M	YOR151C	1	RPB2	NTYQSAMGKQAMGVFLTNYNVR	775	1//7	7//19	0.924	1.5	R.K[2899.45]GQELK.L	YIL021W	1	RPB3	KGQELK	149	170792	170192	186335	168603	1.10517	0.144267	-0.0477332
						-1	2.02047	JL102921_110821_RPB4_C1_70B.12020.12020.3	N	7.27075	0.234132		//16	18//87	5.75125	1.09524	R.NTYQSAM[147.04]GK[1108.66]QAM[147.04]GVFLTNYNVR.M	YOR151C	1	RPB2	NTYQSAMGKQAMGVFLTNYNVR	775	//7	6//19	1.5195	1.66667	R.K[2931.44]GQELK.L	YIL021W	1	RPB3	KGQELK	149	103458	115764	112719	116112	0.970773	-0.0427942	-0.234794
						-2	6.69615	JL102921_110821_RPB4_C1_50B.12113.12113.3	N	6.8155	0.199979		//16	20//87	5.4475	1.02381	R.NTYQSAM[147.04]GK[1108.69]QAM[147.04]GVFLTNYNVR.M	YOR151C	1	RPB2	NTYQSAMGKQAMGVFLTNYNVR	775	//7	5//19	1.368	1.33333	R.K[2931.47]GQELK.L	YIL021W	1	RPB3	KGQELK	149	113636	116846	123934	116162	1.0669	0.0934296	-0.0985704
	2	RPB2:426---RPB3:169	8.74575	-0.064241	0.064241
						-2	14.6777	JL102921_110821_RPB4_C1_D.37558.37558.4	N	8.74575	0.237588		1//15	19//125	7.72725	1.3	K.E[111.03]HAK[1892.97]WGPAAAIEFEYDPWNKLK.H	YIL021W	1	RPB3	EHAKWGPAAAIEFEYDPWNKLK	169	//13	6//55	1.0185	0.65	K.LTK[2988.47]DIFRYM[147.04]QR.T	YOR151C	1	RPB2	LTKDIFRYMQR	426	161234	182841	175638	183636	0.956448	-0.064241	-0.256241
	3	RPB2:987---RPB3:161	6.1765	0.0185674	-0.0185674
						0	5.48122	JL102921_110821_RPB4_C1_100B.08460.08460.5	N	6.1765	0.22285		//14	14//73	3.961	1.86364	R.HGQK[1387.85]GTIGITYR.R	YOR151C	1	RPB2	HGQKGTIGITYR	987	3//10	12//55	2.2155	1.83333	K.K[1736.99]GIAKEHAK.W	YIL021W	1	RPB3	KGIAKEHAK	161	338816	364923	369318	364595	1.01295	0.0185674	-0.173433
	4	RPB2:987---RPB3:165	5.1105	0.121563	-0.121563
						0	6.12808	JL102921_110821_RPB4_C1_100B.08446.08446.4	P	5.1105	0.145534	0.573	//14	13//60	2.97825	1.25	R.HGQK[1387.84]GTIGITYR.R	YOR151C	1	RPB2	HGQKGTIGITYR	987	//11	13//38	2.13225	1.66667	K.KGIAK[1736.98]EHAK.W	YIL021W	1	RPB3	KGIAKEHAK	165	251241	234401	274299	230412	1.19047	0.25153	0.0595295
						0	0.690901	JL102921_110821_RPB4_C1_30B.06605.06605.4	NP	3.39575	0.170705	0.0538	//14	12//61	1.86225	1	R.HGQK[1259.74]GTIGITYR.R	YOR151C	1	RPB2	HGQKGTIGITYR	987	//10	7//33	1.5335	0.9375	K.GIAK[1736.98]EHAK.W	YIL021W	1	RPB3	GIAKEHAK	165	69373.8	75981.9	75603.9	76045.5	0.994192	-0.00840324	-0.200403
	5	RPB2:934---RPB3:154	7.0955	1.49816	-1.49816
						0	2.27523	JL102921_110821_RPB4_C1_30B.07269.07269.5	N	7.0955	0.23377		//14	18//81	4.87075	2.18182	R.K[425.27]GQELK[1268.71]LTC[160.03]VAK.K	YIL021W	1	RPB3	KGQELKLTCVAK	154	//9	7//35	2.22475	1.5	R.TAYHSK[2078.21]R.D	YOR151C	1	RPB2	TAYHSKR	934	708783	224216	779146	167735	4.64511	2.21571	2.02371
						0	2.41902	JL102921_110821_RPB4_C1_50B.06030.06030.5	N	6.02025	0.165108		//14	23//77	4.10625	2.68182	R.KGQELK[1268.71]LTC[160.03]VAK.K	YIL021W	1	RPB3	KGQELKLTCVAK	154	//9	7//36	1.914	1.16667	R.TAYHSK[1781.04]R.D	YOR151C	1	RPB2	TAYHSKR	934	1.59511e+06	888677	1.74879e+06	801314	2.1824	1.12592	0.933916
						0	2.27523	JL102921_110821_RPB4_C1_50B.07006.07006.5	N	4.87175	0.170418		//14	13//81	2.73825	1.36364	R.K[425.27]GQELK[1268.71]LTC[160.03]VAK.K	YIL021W	1	RPB3	KGQELKLTCVAK	154	//9	7//35	2.1335	1.66667	R.TAYHSK[2078.21]R.D	YOR151C	1	RPB2	TAYHSKR	934	3.04204e+06	1.66931e+06	3.33544e+06	1.50006e+06	2.22354	1.15286	0.960856
	6	RPB2:886---RPB3:149	13.5198	-0.0263876	0.0263876
						0	4.27381	JL102921_110821_RPB4_C1_30B.09164.09164.4	P	13.5198	0.466423	0.0597	//18	34//124	12.598	2.75	R.MK[1108.67]HGTYDKLDDDGLIAPGVR.V	YOR151C	1	RPB2	MKHGTYDKLDDDGLIAPGVR	886	//7	4//26	0.92175	0.5	R.K[2607.36]GQELK.L	YIL021W	1	RPB3	KGQELK	149	436748	647602	473913	665518	0.712096	-0.489856	-0.681856
						-1	1.64001	JL102921_110821_RPB4_C1_30B.08843.08843.5	P	9.23175	0.376514	0.0554	//18	25//167	8.56125	1.625	R.M[147.04]K[1108.67]HGTYDKLDDDGLIAPGVR.V	YOR151C	1	RPB2	MKHGTYDKLDDDGLIAPGVR	886	//7	4//33	0.6705	0.75	R.K[2623.35]GQELK.L	YIL021W	1	RPB3	KGQELK	149	1.01283e+06	973128	1.10544e+06	959965	1.15154	0.203568	0.0115677
						0	1.04811	JL102921_110821_RPB4_C1_30B.08839.08839.5	P	8.4555	0.35415	0.144	//18	25//167	7.734	1.65	R.M[147.04]K[1108.67]HGTYDKLDDDGLIAPGVR.V	YOR151C	1	RPB2	MKHGTYDKLDDDGLIAPGVR	886	//7	3//33	0.7215	0.666667	R.K[2623.35]GQELK.L	YIL021W	1	RPB3	KGQELK	149	959345	919730	1.04709e+06	907054	1.15439	0.207125	0.0151252
	7	RPB2:649---RPB3:149	5.87425	0.342242	-0.342242
						0	12.708	JL102921_110821_RPB4_C1_100B.12504.12504.5	N	5.87425	0.177542		1//17	14//163	3.3255	0.763158	R.VYRPLFIVEDDESLGHK[1108.63]ELK.V	YOR151C	1	RPB2	VYRPLFIVEDDESLGHKELK	649	1//7	9//33	2.54875	1.75	R.K[2793.47]GQELK.L	YIL021W	1	RPB3	KGQELK	149	1.81467e+06	1.60192e+06	1.98233e+06	1.56369e+06	1.26773	0.342242	0.150242
	8	RPB2:246---RPB3:15	10.8355	0.12985	-0.12985
						-2	-6.21066	JL102921_110821_RPB4_C1.25492.25492.4	P	10.8355	0.304347	0.677	//16	25//136	10.5373	1.65217	R.EASK[2582.44]DNVDFILSNVDLAMANSLR.R	YIL021W	1	RPB3	EASKDNVDFILSNVDLAMANSLR	15	//20	7//123	0.29825	0.166667	K.AAPSPISHVAEIRSALEK[2928.51]GSR.F	YOR151C	1	RPB2	AAPSPISHVAEIRSALEKGSR	246	160512	143013	175326	139767	1.25441	0.327012	0.135012
						-1	-5.67359	JL102921_110821_RPB4_C1_D.30200.30200.5	P	10.6032	0.290234	0.711	//16	25//183	10.0363	1.54348	R.EASK[2582.44]DNVDFILSNVDLAMANSLR.R	YIL021W	1	RPB3	EASKDNVDFILSNVDLAMANSLR	15	//20	5//162	0.567	0.166667	K.AAPSPISHVAEIRSALEK[2928.51]GSR.F	YOR151C	1	RPB2	AAPSPISHVAEIRSALEKGSR	246	306029	286231	334107	281447	1.1871	0.247447	0.0554469
						-2	-1.5519	JL102921_110821_RPB4_C1.25601.25601.5	P	10.3335	0.335929	0.544	//16	19//183	9.70675	1.34783	R.EASK[2582.44]DNVDFILSNVDLAMANSLR.R	YIL021W	1	RPB3	EASKDNVDFILSNVDLAMANSLR	15	//20	6//162	0.62675	0.190476	K.AAPSPISHVAEIRSALEK[2928.51]GSR.F	YOR151C	1	RPB2	AAPSPISHVAEIRSALEKGSR	246	185939	207195	202594	207732	0.975266	-0.0361326	-0.228133
						-1	-3.09501	JL102921_110821_RPB4_C1_D.26270.26270.5	P	9.9885	0.270409	0.647	//16	23//182	9.55225	1.30435	R.EASK[2582.44]DNVDFILSNVDLAM[147.04]ANSLR.R	YIL021W	1	RPB3	EASKDNVDFILSNVDLAMANSLR	15	//20	9//162	0.43625	0.214286	K.AAPSPISHVAEIRSALEK[2944.5]GSR.F	YOR151C	1	RPB2	AAPSPISHVAEIRSALEKGSR	246	319912	314360	349079	310925	1.12271	0.166986	-0.0250141
						-1	0.817824	JL102921_110821_RPB4_C1.21773.21773.5	P	9.4835	0.252278	0.585	//16	24//182	8.67675	1.32609	R.EASK[2582.44]DNVDFILSNVDLAM[147.04]ANSLR.R	YIL021W	1	RPB3	EASKDNVDFILSNVDLAMANSLR	15	1//20	13//162	0.80675	0.404762	K.AAPSPISHVAEIRSALEK[2944.5]GSR.F	YOR151C	1	RPB2	AAPSPISHVAEIRSALEKGSR	246	509534	584994	554965	588248	0.943421	-0.0840257	-0.276026
						-1	-1.4319	JL102921_110821_RPB4_C1.25479.25479.6	P	6.971	0.187294	0.343	//16	16//183	6.7515	1.02174	R.EASK[2582.44]DNVDFILSNVDLAMANSLR.R	YIL021W	1	RPB3	EASKDNVDFILSNVDLAMANSLR	15	//20	3//162	0.2195	0.119048	K.AAPSPISHVAEIRSALEK[2928.51]GSR.F	YOR151C	1	RPB2	AAPSPISHVAEIRSALEKGSR	246	389699	389898	425145	386435	1.10017	0.137727	-0.0542734
						-1	-2.90393	JL102921_110821_RPB4_C1.25511.25511.6	P	6.00775	0.145076	0.474	//16	18//183	5.448	0.978261	R.EASK[2582.44]DNVDFILSNVDLAMANSLR.R	YIL021W	1	RPB3	EASKDNVDFILSNVDLAMANSLR	15	3//20	10//162	0.55975	0.285714	K.AAPSPISHVAEIRSALEK[2928.51]GSR.F	YOR151C	1	RPB2	AAPSPISHVAEIRSALEKGSR	246	460041	456827	501926	452382	1.10952	0.149935	-0.042065
	9	RPB2:191---RPB3:149	16.1065	-0.751915	0.751915
						0	6.01581	JL102921_110821_RPB4_C1_50B.12752.12752.4	N	16.1065	0.456339		//18	33//111	14.8825	2.94118	R.SKNC[160.03]YLSEATESDLYK[1108.69]LK.E	YOR151C	1	RPB2	SKNCYLSEATESDLYKLK	191	//7	5//26	1.224	1	R.K[2555.32]GQELK.L	YIL021W	1	RPB3	KGQELK	149	559356	858699	606597	884676	0.685671	-0.544411	-0.736411
						0	5.39154	JL102921_110821_RPB4_C1_30B.11258.11258.4	N	13.428	0.377998		//18	29//111	12.1922	2.41176	R.SKNC[160.03]YLSEATESDLYK[1108.69]LK.E	YOR151C	1	RPB2	SKNCYLSEATESDLYKLK	191	//7	6//26	1.23575	1.08333	R.K[2555.32]GQELK.L	YIL021W	1	RPB3	KGQELK	149	627527	1.2968e+06	676473	1.36045e+06	0.497241	-1.00798	-1.19998
						0	9.52732	JL102921_110821_RPB4_C1_30B.11216.11216.4	N	12.6687	0.364254		//18	28//111	11.1135	2.47059	R.SKNC[160.03]YLSEATESDLYK[1108.7]LK.E	YOR151C	1	RPB2	SKNCYLSEATESDLYKLK	191	//7	7//26	1.55525	1.41667	R.K[2555.33]GQELK.L	YIL021W	1	RPB3	KGQELK	149	517833	887731	560440	921380	0.608261	-0.717237	-0.909237
						0	0.553418	JL102921_110821_RPB4_C1_70B.12736.12736.4	N	11.5375	0.320584		//18	28//111	10.6192	2.29412	R.SKNC[160.03]YLSEATESDLYK[1108.67]LK.E	YOR151C	1	RPB2	SKNCYLSEATESDLYKLK	191	//7	5//26	0.91825	0.75	R.K[2555.3]GQELK.L	YIL021W	1	RPB3	KGQELK	149	655048	701281	714071	700210	1.0198	0.02828	-0.16372
						-59	12.3301	JL102921_110821_RPB4_C1.11575.11575.3	P	7.55725	0.198137	0.67	1//19	17//79	7.039	1.38889	R.SKNCYLSEATESDLYK[1108.67]LK.E	YOR151C	1	RPB2	SKNCYLSEATESDLYKLK	191	//7	4//19	0.51825	0.75	R.K[2498.28]GQELK.L	YIL021W	1	RPB3	KGQELK	149	142707	410225	152435	436633	0.349115	-1.51822	-1.71022
	10	RPB2:1057---RPB3:199	11.8095	-0.0694008	0.0694008
						0	10.3884	JL102921_110821_RPB4_C1_30B.27146.27146.6	NP	11.8095	0.282281	2.58e-06	//16	28//213	8.2915	1.59259	K.VAALSGNEGDASPFTDITVEGISK[2704.26]LLR.E	YOR151C	1	RPB2	VAALSGNEGDASPFTDITVEGISKLLR	1057	//15	10//138	3.518	0.888889	K.HTDYWYEQDSAK[3166.7]EWPQSK.N	YIL021W	1	RPB3	HTDYWYEQDSAKEWPQSK	199	790514	1.0662e+06	859069	1.08766e+06	0.789833	-0.34038	-0.53238
						0	1.52546	JL102921_110821_RPB4_C1_D.31501.31501.5	NP	11.751	0.265649	4.04e-05	//16	25//213	7.49325	1.27778	K.VAALSGNEGDASPFTDITVEGISK[2704.26]LLR.E	YOR151C	1	RPB2	VAALSGNEGDASPFTDITVEGISKLLR	1057	1//15	13//138	4.25775	1.05556	K.HTDYWYEQDSAK[3166.7]EWPQSK.N	YIL021W	1	RPB3	HTDYWYEQDSAKEWPQSK	199	534049	613142	581666	616553	0.943416	-0.0840336	-0.276034
						-1	7.73447	JL102921_110821_RPB4_C1.26819.26819.6	NP	11.4503	0.285995	0.00853	//16	29//213	7.83425	1.62963	K.VAALSGNEGDASPFTDITVEGISK[2704.26]LLR.E	YOR151C	1	RPB2	VAALSGNEGDASPFTDITVEGISKLLR	1057	//15	10//138	3.616	0.888889	K.HTDYWYEQDSAK[3166.7]EWPQSK.N	YIL021W	1	RPB3	HTDYWYEQDSAKEWPQSK	199	401114	512577	436245	520526	0.838086	-0.25483	-0.44683
						0	6.7875	JL102921_110821_RPB4_C1_30B.27112.27112.5	NP	11.2505	0.263401	2.65e-05	//16	22//213	7.133	1.27778	K.VAALSGNEGDASPFTDITVEGISK[2704.26]LLR.E	YOR151C	1	RPB2	VAALSGNEGDASPFTDITVEGISKLLR	1057	//15	11//138	4.1175	1	K.HTDYWYEQDSAK[3166.7]EWPQSK.N	YIL021W	1	RPB3	HTDYWYEQDSAKEWPQSK	199	527051	627863	573767	633584	0.90559	-0.143071	-0.335071
						0	4.82891	JL102921_110821_RPB4_C1.26872.26872.6	NP	11.1327	0.273582	0.0102	//16	28//213	7.17325	1.44444	K.VAALSGNEGDASPFTDITVEGISK[2704.26]LLR.E	YOR151C	1	RPB2	VAALSGNEGDASPFTDITVEGISKLLR	1057	//15	11//138	3.9595	0.916667	K.HTDYWYEQDSAK[3166.7]EWPQSK.N	YIL021W	1	RPB3	HTDYWYEQDSAKEWPQSK	199	882059	1.11165e+06	959502	1.12752e+06	0.850983	-0.232798	-0.424798
						-1	8.55809	JL102921_110821_RPB4_C1_30B.27097.27097.6	P	10.7055	0.260139	9.15e-07	//16	28//213	7.133	1.53704	K.VAALSGNEGDASPFTDITVEGISK[2704.26]LLR.E	YOR151C	1	RPB2	VAALSGNEGDASPFTDITVEGISKLLR	1057	//15	12//138	3.5725	0.944444	K.HTDYWYEQDSAK[3166.7]EWPQSK.N	YIL021W	1	RPB3	HTDYWYEQDSAKEWPQSK	199	354613	467289	385500	475779	0.810249	-0.303562	-0.495562
						-2	5.21784	JL102921_110821_RPB4_C1_30B.27102.27102.6	P	9.97775	0.240631	2.3e-06	//16	27//213	6.72675	1.51852	K.VAALSGNEGDASPFTDITVEGISK[2704.26]LLR.E	YOR151C	1	RPB2	VAALSGNEGDASPFTDITVEGISKLLR	1057	//15	9//138	3.251	0.777778	K.HTDYWYEQDSAK[3166.7]EWPQSK.N	YIL021W	1	RPB3	HTDYWYEQDSAKEWPQSK	199	427051	574354	464106	585780	0.792287	-0.335904	-0.527904
						-1	1.22666	JL102921_110821_RPB4_C1.26807.26807.4	N	9.9075	0.227633		//16	18//157	5.7145	1.01923	K.VAALSGNEGDASPFTDITVEGISK[2704.26]LLR.E	YOR151C	1	RPB2	VAALSGNEGDASPFTDITVEGISKLLR	1057	//15	10//104	4.193	0.764706	K.HTDYWYEQDSAK[3166.69]EWPQSK.N	YIL021W	1	RPB3	HTDYWYEQDSAKEWPQSK	199	112798	136003	122776	137396	0.893593	-0.16231	-0.35431
						-2	0.68657	JL102921_110821_RPB4_C1.25828.25828.5	N	9.6925	0.228172		1//10	20//159	5.971	1.36842	K.LK[425.27]HTDYWYEQDSAK[3166.69]EWPQSK.N	YIL021W	1	RPB3	LKHTDYWYEQDSAKEWPQSK	199	//16	17//213	3.7215	0.692308	K.VAALSGNEGDASPFTDITVEGISK[3242.62]LLR.E	YOR151C	1	RPB2	VAALSGNEGDASPFTDITVEGISKLLR	1057	435732	259243	477512	237084	2.01411	1.01014	0.818139
						-1	7.35051	JL102921_110821_RPB4_C1_30B.27073.27073.4	NP	9.69125	0.244238	0.000601	//16	20//157	6.53325	1.07407	K.VAALSGNEGDASPFTDITVEGISK[2704.26]LLR.E	YOR151C	1	RPB2	VAALSGNEGDASPFTDITVEGISKLLR	1057	//15	10//104	3.158	0.722222	K.HTDYWYEQDSAK[3166.7]EWPQSK.N	YIL021W	1	RPB3	HTDYWYEQDSAKEWPQSK	199	74683	91246.2	81275	92292.6	0.880622	-0.183405	-0.375405
						0	7.93142	JL102921_110821_RPB4_C1.26824.26824.5	NP	9.59375	0.216265	0.0256	//16	25//213	5.85925	1.25926	K.VAALSGNEGDASPFTDITVEGISK[2704.26]LLR.E	YOR151C	1	RPB2	VAALSGNEGDASPFTDITVEGISKLLR	1057	//15	10//138	3.7345	0.722222	K.HTDYWYEQDSAK[3166.7]EWPQSK.N	YIL021W	1	RPB3	HTDYWYEQDSAKEWPQSK	199	499030	587959	543342	592701	0.916722	-0.125444	-0.317444
						-1	8.9699	JL102921_110821_RPB4_C1.26825.26825.6	NP	9.415	0.233562	0.0115	//16	25//213	6.4615	1.31481	K.VAALSGNEGDASPFTDITVEGISK[2704.26]LLR.E	YOR151C	1	RPB2	VAALSGNEGDASPFTDITVEGISKLLR	1057	//15	9//138	2.9535	0.777778	K.HTDYWYEQDSAK[3166.7]EWPQSK.N	YIL021W	1	RPB3	HTDYWYEQDSAKEWPQSK	199	400204	538945	434921	549725	0.791161	-0.337957	-0.529957
						0	1.25987	JL102921_110821_RPB4_C1_D.31579.31579.6	NP	8.5555	0.200991	7.69e-05	//16	25//213	5.68075	1.24074	K.VAALSGNEGDASPFTDITVEGISK[2704.26]LLR.E	YOR151C	1	RPB2	VAALSGNEGDASPFTDITVEGISKLLR	1057	//15	8//138	2.87475	0.583333	K.HTDYWYEQDSAK[3166.7]EWPQSK.N	YIL021W	1	RPB3	HTDYWYEQDSAKEWPQSK	199	301591	399379	327836	406803	0.805884	-0.311355	-0.503355
						-1	-1.16027	JL102921_110821_RPB4_C1_30B.27067.27067.4	NP	8.42	0.190696	0.0593	//16	17//157	5.28375	0.87037	K.VAALSGNEGDASPFTDITVEGISK[2704.26]LLR.E	YOR151C	1	RPB2	VAALSGNEGDASPFTDITVEGISKLLR	1057	//15	11//104	3.13625	0.805556	K.HTDYWYEQDSAK[3166.7]EWPQSK.N	YIL021W	1	RPB3	HTDYWYEQDSAKEWPQSK	199	69272.1	88454.7	75340.1	89820.6	0.838784	-0.253628	-0.445628
						-2	4.9433	JL102921_110821_RPB4_C1_D.31485.31485.6	P	8.20425	0.18649	0.00172	//16	24//213	5.16625	1.03704	K.VAALSGNEGDASPFTDITVEGISK[2704.26]LLR.E	YOR151C	1	RPB2	VAALSGNEGDASPFTDITVEGISKLLR	1057	//15	10//138	3.038	0.888889	K.HTDYWYEQDSAK[3166.7]EWPQSK.N	YIL021W	1	RPB3	HTDYWYEQDSAKEWPQSK	199	228756	280992	248929	284352	0.875424	-0.191945	-0.383945
						-2	0.975388	JL102921_110821_RPB4_C1_30B.26081.26081.5	N	8.092	0.202541		//10	12//159	3.7865	0.815789	K.LK[425.27]HTDYWYEQDSAK[3166.7]EWPQSK.N	YIL021W	1	RPB3	LKHTDYWYEQDSAKEWPQSK	199	//16	17//213	4.3055	0.788462	K.VAALSGNEGDASPFTDITVEGISK[3242.63]LLR.E	YOR151C	1	RPB2	VAALSGNEGDASPFTDITVEGISKLLR	1057	163300	110681	178794	103776	1.72289	0.784833	0.592833
						-3	3.84972	JL102921_110821_RPB4_C1.25850.25850.5	N	7.8805	0.176038		//10	15//159	4.9005	1.02632	K.LK[425.27]HTDYWYEQDSAK[3166.72]EWPQSK.N	YIL021W	1	RPB3	LKHTDYWYEQDSAKEWPQSK	199	//16	17//213	2.98	0.596154	K.VAALSGNEGDASPFTDITVEGISK[3242.64]LLR.E	YOR151C	1	RPB2	VAALSGNEGDASPFTDITVEGISKLLR	1057	411691	252104	451080	231910	1.94507	0.95982	0.76782
						0	4.33056	JL102921_110821_RPB4_C1.26864.26864.4	NP	7.553	0.182649	0.0148	//16	17//157	4.92825	0.87037	K.VAALSGNEGDASPFTDITVEGISK[2704.26]LLR.E	YOR151C	1	RPB2	VAALSGNEGDASPFTDITVEGISKLLR	1057	//15	11//104	2.62475	0.666667	K.HTDYWYEQDSAK[3166.7]EWPQSK.N	YIL021W	1	RPB3	HTDYWYEQDSAKEWPQSK	199	325676	429930	354033	437807	0.808651	-0.306412	-0.498412
						-1	7.73447	JL102921_110821_RPB4_C1_D.31589.31589.6	P	7.3265	0.172214	0.00213	//16	23//213	4.372	1	K.VAALSGNEGDASPFTDITVEGISK[2704.26]LLR.E	YOR151C	1	RPB2	VAALSGNEGDASPFTDITVEGISKLLR	1057	//15	9//138	2.9545	0.666667	K.HTDYWYEQDSAK[3166.7]EWPQSK.N	YIL021W	1	RPB3	HTDYWYEQDSAKEWPQSK	199	347072	464808	377211	473889	0.79599	-0.329178	-0.521178
						-1	3.32391	JL102921_110821_RPB4_C1_D.31601.31601.4	P	5.78525	0.165683	0.00612	//16	16//157	3.95175	0.685185	K.VAALSGNEGDASPFTDITVEGISK[2704.26]LLR.E	YOR151C	1	RPB2	VAALSGNEGDASPFTDITVEGISKLLR	1057	1//15	11//104	1.8335	0.527778	K.HTDYWYEQDSAK[3166.7]EWPQSK.N	YIL021W	1	RPB3	HTDYWYEQDSAKEWPQSK	199	137825	169610	149975	171668	0.873638	-0.194892	-0.386892
						-2	13.7883	JL102921_110821_RPB4_C1.27079.27079.5	P	5.62975	0.123106	0.239	//16	18//213	3.287	0.685185	K.VAALSGNEGDASPFTDITVEGISK[2704.26]LLR.E	YOR151C	1	RPB2	VAALSGNEGDASPFTDITVEGISKLLR	1057	//15	10//138	2.34275	0.694444	K.HTDYWYEQDSAK[3166.7]EWPQSK.N	YIL021W	1	RPB3	HTDYWYEQDSAKEWPQSK	199	280313	282381	305786	280089	1.09175	0.126636	-0.0653638
						0	12.6215	JL102921_110821_RPB4_C1.27049.27049.5	P	5.2985	0.118574	0.0332	//16	14//213	3.5025	0.703704	K.VAALSGNEGDASPFTDITVEGISK[2704.26]LLR.E	YOR151C	1	RPB2	VAALSGNEGDASPFTDITVEGISKLLR	1057	//15	9//138	1.796	0.527778	K.HTDYWYEQDSAK[3166.7]EWPQSK.N	YIL021W	1	RPB3	HTDYWYEQDSAKEWPQSK	199	338629	334820	369478	331399	1.1149	0.156918	-0.0350821
						2788	-65.5947	JL102921_110821_RPB4_C1_30B.25553.25553.3	P	3.9145	0.0847588	0.236	//16	12//101	1.848	0.62963	K.VAALSGNEGDASPFTDITVEGISK[2945.44]LLR.E	YOR151C	1	RPB2	VAALSGNEGDASPFTDITVEGISKLLR	1057	//13	11//75	2.0665	0.7	K.LKHTDYWYEQDSAK[3166.7]EWPQSK.N	YIL021W	1	RPB3	LKHTDYWYEQDSAKEWPQSK	199	314706	399404	342302	405355	0.84445	-0.243917	-0.435917
						-1	6.64285	JL102921_110821_RPB4_C1_30B.25592.25592.6	P	2.68575	0.0666886	0.368	//16	9//213	1.527	0.351852	K.VAALSGNEGDASPFTDITVEGISK[2945.44]LLR.E	YOR151C	1	RPB2	VAALSGNEGDASPFTDITVEGISKLLR	1057	//13	9//155	1.15875	0.375	K.LKHTDYWYEQDSAK[3166.7]EWPQSK.N	YIL021W	1	RPB3	LKHTDYWYEQDSAKEWPQSK	199	244186	335345	265289	342596	0.774351	-0.368941	-0.560941
	11	RPB2:228---RPB3:146	11.8673	-0.223078	0.223078
						-3	2.90454	JL102921_110821_RPB4_C1_70B.17975.17975.5	N	11.8673	0.317578		2//15	24//101	10.056	2.75	K.K[1646.93]AAPSPISHVAEIR.S	YOR151C	1	RPB2	KAAPSPISHVAEIR	228	2//12	12//58	1.81125	1	K.E[111.03]GNGVLIC[160.03]K[1882.08]LR.K	YIL021W	1	RPB3	EGNGVLICKLR	146	551138	857995	597541	884823	0.675322	-0.566352	-0.758352
						-3	2.73274	JL102921_110821_RPB4_C1_70B.17958.17958.3	N	6.57	0.183098		1//15	15//61	5.47725	1.5	K.K[1646.93]AAPSPISHVAEIR.S	YOR151C	1	RPB2	KAAPSPISHVAEIR	228	2//12	6//36	1.09275	0.555556	K.E[111.03]GNGVLIC[160.03]K[1882.08]LR.K	YIL021W	1	RPB3	EGNGVLICKLR	146	233861	236524	255102	234709	1.08688	0.120196	-0.0718038
	12	RPB2:228---RPB3:154	7.27775	-0.371159	0.371159
						-58	10.3037	JL102921_110821_RPB4_C1.21193.21193.4	P	7.27775	0.216761	0.635	1//15	18//81	7.076	1.71429	K.K[1595.92]AAPSPISHVAEIR.S	YOR151C	1	RPB2	KAAPSPISHVAEIR	228	1//13	5//50	0.20175	0.227273	K.GQELK[1882.09]LTCVAK.K	YIL021W	1	RPB3	GQELKLTCVAK	154	553989	761873	601854	778433	0.773161	-0.371159	-0.563159
18	RPB2---RPB5
	1	RPB2:1080---RPB5:191	4.816	-0.438582	0.438582
						0	7.68835	JL102921_110821_RPB4_C1_30B.27431.27431.4	P	4.816	0.136321	0.636	//16	12//93	4.78375	1.03333	K.K[1722.03]LM[147.04]AQIFFGPTYYQR.L	YOR151C	1	RPB2	KLMAQIFFGPTYYQR	1080	//14	2//58	0.03225	0.0833333	R.ADPVALYLGLK[2285.21]R.G	YBR154C	1	RPB5	ADPVALYLGLKR	191	177453	254694	192655	261100	0.737859	-0.438582	-0.630582
	2	RPB2:813---RPB5:171	4.65525	0.0396525	-0.0396525
						-2	5.96212	JL102921_110821_RPB4_C1_50B.11342.11342.4	N	4.65525	0.172455		//10	7//38	1.61775	1.21429	R.AM[147.04]EYLK[1376.81]FR.E	YOR151C	1	RPB2	AMEYLKFR	813	//8	9//36	3.0375	2	R.LK[1479.78]ESQLPR.I	YBR154C	1	RPB5	LKESQLPR	171	1293839	1.37542e+06	1.41054e+06	1.3723e+06	1.02787	0.0396525	-0.152348
	3	RPB2:1102---RPB5:171	4.50325	0.165203	-0.165203
						0	1.70596	JL102921_110821_RPB4_C1_50B.06515.06515.5	N	4.50325	0.18384		//12	9//61	0.94825	1	R.HM[147.04]VDDK[1376.82]IHAR.A	YOR151C	1	RPB2	HMVDDKIHAR	1102	//8	10//43	3.555	1.85714	R.LK[1643.86]ESQLPR.I	YBR154C	1	RPB5	LKESQLPR	171	1.05521e+06	950815	1.15246e+06	930578	1.23844	0.308522	0.116522
						0	2.20122	JL102921_110821_RPB4_C1_70B.06924.06924.5	P	3.924	0.137328	0.73	1//12	9//61	0.657	0.8	R.HM[147.04]VDDK[1376.82]IHAR.A	YOR151C	1	RPB2	HMVDDKIHAR	1102	//8	8//43	3.267	1.5	R.LK[1643.86]ESQLPR.I	YBR154C	1	RPB5	LKESQLPR	171	531364	571129	579214	570494	1.01529	0.0218849	-0.170115
	4	RPB2:987---RPB5:201	4.3155	1.01877	-1.01877
						0	2.75612	JL102921_110821_RPB4_C1_30B.06171.06171.4	P	4.3155	0.191966	0.0538	//14	17//62	3.8465	2	R.HGQK[1170.64]GTIGITYR.R	YOR151C	1	RPB2	HGQKGTIGITYR	987	//8	4//33	0.469	0.857143	R.K[1736.98]SETSGR.Y	YBR154C	1	RPB5	KSETSGR	201	105904	62698.8	116062	57281.1	2.02619	1.01877	0.826767
	5	RPB2:987---RPB5:197	5.433	0.220299	-0.220299
						0	1.51191	JL102921_110821_RPB4_C1_D.12450.12450.5	N	5.433	0.235741		//14	16//72	4.373	2	R.HGQK[1475.94]GTIGITYR.R	YOR151C	1	RPB2	HGQKGTIGITYR	987	//11	8//48	1.06	0.9375	K.RGEVVK[1736.98]IIR.K	YBR154C	1	RPB5	RGEVVKIIR	197	793388	754505	866029	743389	1.16497	0.220299	0.0282985
	6	RPB2:934---RPB5:197	5.54825	0.51304	-0.51304
						0	3.07925	JL102921_110821_RPB4_C1_70B.06877.06877.4	N	5.54825	0.221979		1//10	11//39	3.65775	1.85714	R.GEVVK[1268.71]IIR.K	YBR154C	1	RPB5	GEVVKIIR	197	//9	6//33	1.8905	1.16667	R.TAYHSK[1319.84]R.D	YOR151C	1	RPB2	TAYHSKR	934	745066	593255	814684	570885	1.42705	0.51304	0.32104
19	RPB2---RPB9
	1	RPB2:987---RPB9:77	5.76725	-0.105087	0.105087
						0	6.25524	JL102921_110821_RPB4_C1_100B.08245.08245.5	N	5.76725	0.222283		//13	8//70	1.48925	0.9	R.SDREC[160.03]PK[1737]C[160.03]HSR.E	YGL070C	1	RPB9	SDRECPKCHSR	77	//14	19//69	4.278	2.18182	R.HGQK[1837.89]GTIGITYR.R	YOR151C	1	RPB2	HGQKGTIGITYR	987	397848	409229	433899	406850	1.06648	0.0928594	-0.0991406
						0	4.9858	JL102921_110821_RPB4_C1_100B.08249.08249.6	N	3.876	0.172677		//13	8//55	1.247	1.2	R.SDREC[160.03]PK[1736.99]C[160.03]HSR.E	YGL070C	1	RPB9	SDRECPKCHSR	77	1//14	10//56	2.629	1.09091	R.HGQK[1837.89]GTIGITYR.R	YOR151C	1	RPB2	HGQKGTIGITYR	987	213215	280869	231787	285964	0.810546	-0.303034	-0.495034
	2	RPB2:886---RPB9:77	7.11675	-0.882244	0.882244
						-1	0.0786139	JL102921_110821_RPB4_C1_100B.10371.10371.4	N	7.11675	0.248252		//18	15//118	6.07	0.947368	R.M[147.04]K[1837.88]HGTYDKLDDDGLIAPGVR.V	YOR151C	1	RPB2	MKHGTYDKLDDDGLIAPGVR	886	//13	6//55	1.04675	0.7	R.SDREC[160.03]PK[2623.35]C[160.03]HSR.E	YGL070C	1	RPB9	SDRECPKCHSR	77	75376.1	143653	81402.5	150044	0.542523	-0.882244	-1.07424
20	RPB4---RPB7
	1	RPB4:76---RPB7:23	2.6515	-2.01197	2.01197
						0	13.3665	JL102921_110821_RPB4_C1_70B.05124.05124.4	N	2.6515	0.174326		//8	5//29	0.9585	0.9	R.SQK[1232.73]K[425.27]HK.K	YJL140W	1	RPB4	SQKKHK	76	//6	6//26	1.693	1.6	R.M[147.04]K[1458.91]QYLK.T	YDR404C	1	RPB7	MKQYLK	23	42706.3	169032	45055.3	181723	0.247934	-2.01197	-2.20397
	2	RPB4:80---RPB7:23	4.766	-1.9654	1.9654
						0	1.30832	JL102921_110821_RPB4_C1_70B.05467.05467.3	N	4.766	0.186913		//6	7//21	2.7185	2	R.M[147.04]K[931.61]QYLK.T	YDR404C	1	RPB7	MKQYLK	23	//5	6//16	2.0475	2	K.K[1232.71]HLK.H	YJL140W	1	RPB4	KHLK	80	100002	384065	105646	412567	0.256069	-1.9654	-2.1574
21	RPB5---RPB6
	1	RPB5:171---RPB6:72	4.727	-0.783841	0.783841
						0	1.55164	JL102921_110821_RPB4_C1_50B.06963.06963.3	N	4.727	0.173822		//8	7//30	2.238	1.42857	R.LK[1091.68]ESQLPR.I	YBR154C	1	RPB5	LKESQLPR	171	//6	6//21	2.489	1.6	K.EK[1376.83]AIPK.D	YPR187W	1	RPB6	EKAIPK	72	667088	1.13002e+06	722140	1.17196e+06	0.616181	-0.698575	-0.890575
						0	3.34442	JL102921_110821_RPB4_C1_50B.06973.06973.4	N	4.15125	0.16671		//8	11//38	3.15375	1.85714	R.LK[1091.68]ESQLPR.I	YBR154C	1	RPB5	LKESQLPR	171	//6	5//27	0.9975	1.2	K.EK[1376.83]AIPK.D	YPR187W	1	RPB6	EKAIPK	72	1.27589e+06	2.08023e+06	1.38216e+06	2.15206e+06	0.642253	-0.638787	-0.830787
						0	2.75768	JL102921_110821_RPB4_C1.06493.06493.4	P	1.61525	0.0624336	0.0649	//8	6//38	0.721	0.5	R.LK[1091.68]ESQLPR.I	YBR154C	1	RPB5	LKESQLPR	171	1//6	8//27	0.89425	1.25	K.EK[1376.82]AIPK.D	YPR187W	1	RPB6	EKAIPK	72	1.38466e+06	2.87287e+06	1.49252e+06	3.0145e+06	0.495116	-1.01416	-1.20616
	2	RPB5:171---RPB6:67	4.1295	-0.531402	0.531402
						0	4.30239	JL102921_110821_RPB4_C1.06460.06460.4	P	4.1295	0.124819	0.0216	//8	9//36	2.45675	1.25	R.LK[1449.91]ESQLPR.I	YBR154C	1	RPB5	LKESQLPR	171	1//7	9//33	1.67275	1.5	R.K[1376.82]TLK[425.27]EK.A	YPR187W	1	RPB6	KTLKEK	67	1.0494e+06	1.5103e+06	1.13925e+06	1.54861e+06	0.735659	-0.44289	-0.63489
						0	2.11237	JL102921_110821_RPB4_C1.06514.06514.5	P	3.154	0.119165	0.0555	//8	8//44	2.89625	1.3125	R.LK[1449.91]ESQLPR.I	YBR154C	1	RPB5	LKESQLPR	171	1//7	5//40	0.25775	0.583333	R.K[1376.82]TLK[425.27]EK.A	YPR187W	1	RPB6	KTLKEK	67	764320	1.23123e+06	828168	1.27271e+06	0.65071	-0.619913	-0.811913
	3	RPB5:171---RPB6:70	5.49625	-0.642915	0.642915
						0	4.38922	JL102921_110821_RPB4_C1_50B.06907.06907.5	N	5.49625	0.247306		//7	9//40	1.68625	1.58333	R.K[1376.83]TLK[425.27]EK.A	YPR187W	1	RPB6	KTLKEK	70	//8	12//44	3.81	2.21429	R.LK[1449.92]ESQLPR.I	YBR154C	1	RPB5	LKESQLPR	171	862157	1.40939e+06	933929	1.45831e+06	0.640418	-0.642915	-0.834915

## Sheet: Interlinks_Exp_II
index	Protein-protein	Crosslinkingsites	Xcorr	Average(log2(127/126))	Average(log2(126/127))	Da	ppm	spectrum	engine	xcorr	Xcorr_norm	expect	immonium1	ion1	dot1	connective1	peptide1	protein1	Unique_protein1	subunit1	realpep1	position1	immonium2	ion2	dot2	connective2	peptide2	protein2	Unique_protein2	subunit2	realpep2	position2	Q2link0intensity	Q2link1intensity	corrected_126	Corrected_127	ratio127/126	log2ratio127/126	adjustedLog2127/126
1	RPB1---RPB11
	1	RPB11:55---RPB1:1286	5.82075	0.012645	-0.012645
						0	2.6156	JL102921_110821_RPB4_C2_70B.10436.10436.4	N	5.82075	0.209572		//10	7//38	1.905	1	R.VVM[147.04]M[147.04]K[1345.83]YDR.K	YDL140C	1	RPB1	VVMMKYDR	1286	//9	11//42	3.91575	1.875	R.K[1479.77]VLFAAYK.V	YOL005C	1	RPB11	KVLFAAYK	55	493535	533522	537942	533248	1.0088	0.012645	-0.105555
	2	RPB11:55---RPB1:2	6.7915	0.315911	-0.315911
						0	3.27025	JL102921_110821_RPB4_C2_C18.14137.14137.3	P	6.7915	0.223976	0.0122	//12	7//48	1.97775	0.818182	M.V[1316.79]GQQYSSAPLR.T	YDL140C	1	RPB1	VGQQYSSAPLR	2	1//9	12//31	4.81375	2.125	R.K[1611.88]VLFAAYK.V	YOL005C	1	RPB11	KVLFAAYK	55	727586	652659	794680	638401	1.2448	0.315911	0.197711
	3	RPB11:55---RPB1:941	4.275	0.452242	-0.452242
						0	-1.80136	JL102921_110821_RPB4_C2_100B.12949.12949.4	P	4.275	0.203088	3e-14	//9	10//40	4.0785	1.8125	R.K[969.62]VLFAAYK.V	YOL005C	1	RPB11	KVLFAAYK	55	//5	2//21	0.1965	0.5	R.K[1345.82]FLR.E	YDL140C	2	RPB1	KFLR	941	370883	300339	405477	289723	1.39953	0.484944	0.366744
						0	-1.11561	JL102921_110821_RPB4_C2_70B.12560.12560.4	P	4.06375	0.196944	0.598	//9	11//40	3.91225	2.0625	R.K[969.62]VLFAAYK.V	YOL005C	1	RPB11	KVLFAAYK	55	//5	2//21	0.1515	0.5	R.K[1345.82]FLR.E	YDL140C	2	RPB1	KFLR	941	536067	451560	585856	438023	1.3375	0.41954	0.30134
	4	RPB11:62---RPB1:984	5.7355	-0.488331	0.488331
						0	16.9188	JL102921_110821_RPB4_C2_50B.25640.25640.6	N	5.7355	0.181279		1//17	13//84	3.50225	1.07143	K.VLFAAYK[1904.08]VEHPFFAR.F	YOL005C	1	RPB11	VLFAAYKVEHPFFAR	62	//16	12//72	2.23325	1.42308	K.PSDLTIK[2201.16]DIVLGVK.D	YDL140C	1	RPB1	PSDLTIKDIVLGVK	984	159333	236027	172894	242539	0.712849	-0.488331	-0.606531
	5	RPB11:62---RPB1:941	8.787	0.907764	-0.907764
						0	1.76526	JL102921_110821_RPB4_C2_C18.17528.17528.5	P	8.787	0.280941	0.681	//17	26//114	8.54175	2.5	K.VLFAAYK[969.62]VEHPFFAR.F	YOL005C	1	RPB11	VLFAAYKVEHPFFAR	62	//5	3//23	0.24525	0.625	R.K[2201.22]FLR.E	YDL140C	2	RPB1	KFLR	941	821361	518286	899758	479580	1.87614	0.907764	0.789564
	6	RPB11:20---RPB1:941	6.205	0.373966	-0.373966
						0	-0.412916	JL102921_110821_RPB4_C2_C18.16066.16066.5	P	6.205	0.207068	0.73	//18	23//149	5.9675	1.34211	K.LK[969.62]IDPDTKAPNAVVITFEK.E	YOL005C	1	RPB11	LKIDPDTKAPNAVVITFEK	20	//5	2//23	0.2375	0.5	R.K[2505.43]FLR.E	YDL140C	2	RPB1	KFLR	941	400330	346654	437397	337521	1.29591	0.373966	0.255766
	7	RPB11:26---RPB1:941	11.3633	-0.104023	0.104023
						0	-2.4952	JL102921_110821_RPB4_C2_30B.21766.21766.6	P	11.3633	0.30668	0.21	//12	35//217	11.313	1.7037	K.IDPDTK[969.62]APNAVVITFEK[425.27]EDHTLGNLIR.A	YOL005C	1	RPB11	IDPDTKAPNAVVITFEKEDHTLGNLIR	26	//5	1//23	0.05025	0.125	R.K[3710.02]FLR.E	YDL140C	2	RPB1	KFLR	941	190796	284295	207015	292265	0.708314	-0.49754	-0.61574
						0	-5.18827	JL102921_110821_RPB4_C2_100B.17255.17255.5	P	9.8795	0.310965	0.0971	//20	25//146	9.66125	1.84211	K.LKIDPDTK[969.62]APNAVVITFEK.E	YOL005C	1	RPB11	LKIDPDTKAPNAVVITFEK	26	//5	4//23	0.21825	0.75	R.K[2505.43]FLR.E	YDL140C	2	RPB1	KFLR	941	365452	423386	397990	426114	0.933998	-0.0985079	-0.216708
						0	-0.966002	JL102921_110821_RPB4_C2_30B.15056.15056.5	P	7.04	0.214641	0.236	//19	18//129	7.00125	1.38235	K.IDPDTK[969.62]APNAVVITFEK.E	YOL005C	1	RPB11	IDPDTKAPNAVVITFEK	26	//5	1//23	0.03875	0.125	R.K[2264.25]FLR.E	YDL140C	2	RPB1	KFLR	941	303444	330794	330713	330912	0.999398	-0.000868887	-0.119069
						0	2.16021	JL102921_110821_RPB4_C2_30B.15015.15015.4	P	6.8895	0.200113	0.729	//19	24//102	6.639	1.79412	K.IDPDTK[969.62]APNAVVITFEK.E	YOL005C	1	RPB11	IDPDTKAPNAVVITFEK	26	//5	2//18	0.2505	0.5	R.K[2264.25]FLR.E	YDL140C	2	RPB1	KFLR	941	451393	541354	491359	546628	0.89889	-0.153784	-0.271984
						1469	53.35	JL102921_110821_RPB4_C2_100B.17287.17287.3	P	6.62525	0.197444	2.44e-06	//20	14//80	6.40325	1.10526	K.LKIDPDTK[969.62]APNAVVITFEK.E	YOL005C	1	RPB11	LKIDPDTKAPNAVVITFEK	26	//5	2//13	0.222	0.5	R.K[2505.43]FLR.E	YDL140C	2	RPB1	KFLR	941	186350	176103	203425	173377	1.17331	0.230586	0.112386
	8	RPB11:26---RPB1:637	9.92525	0.192246	-0.192246
						-59	10.6535	JL102921_110821_RPB4_C2_C18.22372.22372.7	P	9.92525	0.263374	0.147	//14	25//216	9.24925	1.33333	K.IDPDTK[2166.21]APNAVVITFEKEDHTLGNLIR.A	YOL005C	1	RPB11	IDPDTKAPNAVVITFEKEDHTLGNLIR	26	1//16	7//113	0.676	0.34375	R.EK[3412.84]GPQVCAKLFGNIQK.V	YDL140C	1	RPB1	EKGPQVCAKLFGNIQK	637	368961	374291	402458	371545	1.0832	0.115301	-0.00289945
						-3	9.18166	JL102921_110821_RPB4_C2_30B.21697.21697.6	N	8.48575	0.216548		//14	27//158	6.9955	1.25	K.IDPDTK[2205.26]APNAVVITFEKEDHTLGNLIR.A	YOL005C	1	RPB11	IDPDTKAPNAVVITFEKEDHTLGNLIR	26	//16	9//90	1.49025	0.633333	R.E[111.03]K[3412.89]GPQVC[160.03]AKLFGNIQK.V	YDL140C	1	RPB1	EKGPQVCAKLFGNIQK	637	362895	334935	396245	328798	1.20513	0.269191	0.150991
	9	RPB11:26---RPB1:644	13.233	0.466304	-0.466304
						-61	9.96374	JL102921_110821_RPB4_C2_30B.21444.21444.7	P	13.233	0.35907	0.000123	//14	31//216	11.9205	1.55556	K.IDPDTK[2166.21]APNAVVITFEKEDHTLGNLIR.A	YOL005C	1	RPB11	IDPDTKAPNAVVITFEKEDHTLGNLIR	26	//18	11//115	1.3125	0.84375	R.EKGPQVCAK[3412.84]LFGNIQK.V	YDL140C	1	RPB1	EKGPQVCAKLFGNIQK	644	324976	216898	355851	202809	1.75461	0.811153	0.692953
						-59	8.53579	JL102921_110821_RPB4_C2_50B.25736.25736.7	P	12.6125	0.320921	0.309	//14	33//216	11.664	1.72222	K.IDPDTK[2166.21]APNAVVITFEKEDHTLGNLIR.A	YOL005C	1	RPB11	IDPDTKAPNAVVITFEKEDHTLGNLIR	26	//18	9//115	0.9485	0.5625	R.EKGPQVCAK[3412.84]LFGNIQK.V	YDL140C	1	RPB1	EKGPQVCAKLFGNIQK	644	741644	616964	810621	597432	1.35684	0.440252	0.322052
						-59	5.41862	JL102921_110821_RPB4_C2_50B.25085.25085.7	P	12.555	0.384993	0.4	2//12	33//233	11.2547	1.56897	K.LKIDPDTK[2166.21]APNAVVITFEKEDHTLGNLIR.A	YOL005C	1	RPB11	LKIDPDTKAPNAVVITFEKEDHTLGNLIR	26	//18	13//115	1.30025	0.6875	R.EKGPQVCAK[3654.02]LFGNIQK.V	YDL140C	1	RPB1	EKGPQVCAKLFGNIQK	644	657057	404513	719895	372505	1.93258	0.950527	0.832327
						-59	5.58934	JL102921_110821_RPB4_C2_100B.23032.23032.8	P	12.1542	0.344289	3.38e-08	//12	32//233	11.1245	1.46552	K.LKIDPDTK[2166.21]APNAVVITFEKEDHTLGNLIR.A	YOL005C	1	RPB11	LKIDPDTKAPNAVVITFEKEDHTLGNLIR	26	//18	8//115	1.02975	0.53125	R.EKGPQVCAK[3654.02]LFGNIQK.V	YDL140C	1	RPB1	EKGPQVCAKLFGNIQK	644	190427	153588	208197	148073	1.40604	0.491636	0.373436
						-1	1.91997	JL102921_110821_RPB4_C2_C18.22340.22340.6	N	11.8963	0.310368		//14	30//158	10.4942	1.71154	K.IDPDTK[2223.24]APNAVVITFEKEDHTLGNLIR.A	YOL005C	1	RPB11	IDPDTKAPNAVVITFEKEDHTLGNLIR	26	//18	12//90	1.402	0.766667	R.EKGPQVC[160.03]AK[3412.85]LFGNIQK.V	YDL140C	1	RPB1	EKGPQVCAKLFGNIQK	644	553773	523124	604518	515001	1.17382	0.231208	0.113008
						-2	3.14263	JL102921_110821_RPB4_C2_50B.25721.25721.6	N	11.6608	0.316378		//14	28//158	10.0023	1.53846	K.IDPDTK[2223.21]APNAVVITFEKEDHTLGNLIR.A	YOL005C	1	RPB11	IDPDTKAPNAVVITFEKEDHTLGNLIR	26	//18	9//90	1.6585	0.833333	R.EKGPQVC[160.03]AK[3412.83]LFGNIQK.V	YDL140C	1	RPB1	EKGPQVCAKLFGNIQK	644	883897	837408	964863	824695	1.16996	0.226463	0.108263
						-59	9.22763	JL102921_110821_RPB4_C2_50B.26063.26063.6	P	11.6195	0.314657	0.477	2//12	33//233	9.26425	1.53448	K.LKIDPDTK[1909.07]APNAVVITFEKEDHTLGNLIR.A	YOL005C	1	RPB11	LKIDPDTKAPNAVVITFEKEDHTLGNLIR	26	//16	10//93	2.35525	1.03571	K.GPQVCAK[3654.02]LFGNIQK.V	YDL140C	1	RPB1	GPQVCAKLFGNIQK	644	864893	811666	944212	798427	1.18259	0.241951	0.123751
						-58	8.70784	JL102921_110821_RPB4_C2_30B.21497.21497.6	P	11.5585	0.316545	0.0965	//14	34//216	10.3885	1.59259	K.IDPDTK[2166.21]APNAVVITFEKEDHTLGNLIR.A	YOL005C	1	RPB11	IDPDTKAPNAVVITFEKEDHTLGNLIR	26	//18	8//115	1.17	0.4375	R.EKGPQVCAK[3412.84]LFGNIQK.V	YDL140C	1	RPB1	EKGPQVCAKLFGNIQK	644	415247	393255	453286	387267	1.17047	0.227093	0.108893
						-3	1.83173	JL102921_110821_RPB4_C2_50B.25764.25764.7	N	11.2632	0.310479		//14	28//158	10.354	1.53846	K.IDPDTK[2223.22]APNAVVITFEKEDHTLGNLIR.A	YOL005C	1	RPB11	IDPDTKAPNAVVITFEKEDHTLGNLIR	26	//18	8//90	0.90925	0.566667	R.EKGPQVC[160.03]AK[3412.83]LFGNIQK.V	YDL140C	1	RPB1	EKGPQVCAKLFGNIQK	644	886023	676000	969170	646346	1.49946	0.584443	0.466243
						-58	3.76962	JL102921_110821_RPB4_C2_C18.21735.21735.6	P	11.0775	0.316175	0.00312	1//12	32//233	8.9125	1.31034	K.LKIDPDTK[2166.21]APNAVVITFEKEDHTLGNLIR.A	YOL005C	1	RPB11	LKIDPDTKAPNAVVITFEKEDHTLGNLIR	26	//18	15//115	2.165	1.125	R.EKGPQVCAK[3654.02]LFGNIQK.V	YDL140C	1	RPB1	EKGPQVCAKLFGNIQK	644	639965	440742	700599	414405	1.69062	0.757548	0.639348
						-59	6.50925	JL102921_110821_RPB4_C2_C18.21754.21754.5	P	10.9253	0.298121	0.0892	//12	29//233	8.6805	1.31034	K.LKIDPDTK[2166.21]APNAVVITFEKEDHTLGNLIR.A	YOL005C	1	RPB11	LKIDPDTKAPNAVVITFEKEDHTLGNLIR	26	//18	11//115	2.24475	0.9375	R.EKGPQVCAK[3654.02]LFGNIQK.V	YDL140C	1	RPB1	EKGPQVCAKLFGNIQK	644	276018	205821	301978	196089	1.54001	0.622936	0.504736
						-59	6.86844	JL102921_110821_RPB4_C2_30B.22109.22109.7	NP	10.54	0.304448	0.115	//14	28//216	8.596	1.44444	K.IDPDTK[2463.38]APNAVVITFEKEDHTLGNLIR.A	YOL005C	1	RPB11	IDPDTKAPNAVVITFEKEDHTLGNLIR	26	//17	10//121	1.944	0.75	R.EK[425.27]GPQVCAK[3412.84]LFGNIQK.V	YDL140C	1	RPB1	EKGPQVCAKLFGNIQK	644	315162	195255	345287	180029	1.91796	0.939571	0.821371
						-3	3.17114	JL102921_110821_RPB4_C2_50B.25743.25743.7	N	9.986	0.263497		//14	24//158	8.96425	1.25	K.IDPDTK[2223.21]APNAVVITFEKEDHTLGNLIR.A	YOL005C	1	RPB11	IDPDTKAPNAVVITFEKEDHTLGNLIR	26	//18	10//90	1.02175	0.866667	R.EKGPQVC[160.03]AK[3412.83]LFGNIQK.V	YDL140C	1	RPB1	EKGPQVCAKLFGNIQK	644	704064	571310	769721	551278	1.39625	0.481555	0.363355
						-2	3.82818	JL102921_110821_RPB4_C2_30B.21423.21423.7	N	9.97225	0.269189		//14	26//158	8.8105	1.38462	K.IDPDTK[2223.25]APNAVVITFEKEDHTLGNLIR.A	YOL005C	1	RPB11	IDPDTKAPNAVVITFEKEDHTLGNLIR	26	//18	10//90	1.16175	0.866667	R.EKGPQVC[160.03]AK[3412.86]LFGNIQK.V	YDL140C	1	RPB1	EKGPQVCAKLFGNIQK	644	258723	191521	283073	182254	1.55318	0.635223	0.517023
						-59	9.78415	JL102921_110821_RPB4_C2_30B.20963.20963.7	P	9.48975	0.26218	0.114	//12	23//233	8.6905	1.13793	K.LKIDPDTK[2166.21]APNAVVITFEKEDHTLGNLIR.A	YOL005C	1	RPB11	LKIDPDTKAPNAVVITFEKEDHTLGNLIR	26	//18	6//115	0.79925	0.40625	R.EKGPQVCAK[3654.02]LFGNIQK.V	YDL140C	1	RPB1	EKGPQVCAKLFGNIQK	644	330642	282720	361300	274805	1.31475	0.394791	0.276591
						-2	5.65452	JL102921_110821_RPB4_C2_50B.25709.25709.6	N	8.85675	0.242594		//14	28//158	7.1885	1.23077	K.IDPDTK[2223.2]APNAVVITFEKEDHTLGNLIR.A	YOL005C	1	RPB11	IDPDTKAPNAVVITFEKEDHTLGNLIR	26	//18	11//90	1.66825	0.9	R.EKGPQVC[160.03]AK[3412.82]LFGNIQK.V	YDL140C	1	RPB1	EKGPQVCAKLFGNIQK	644	786550	786102	858101	779025	1.10151	0.139479	0.0212788
						-3	8.31758	JL102921_110821_RPB4_C2_50B.26077.26077.6	N	8.77625	0.237077		//14	26//158	7.30475	1.25	K.IDPDTK[2205.26]APNAVVITFEKEDHTLGNLIR.A	YOL005C	1	RPB11	IDPDTKAPNAVVITFEKEDHTLGNLIR	26	//17	9//85	1.4715	0.75	R.E[111.03]KGPQVC[160.03]AK[3412.89]LFGNIQK.V	YDL140C	1	RPB1	EKGPQVCAKLFGNIQK	644	871076	851788	950545	842005	1.12891	0.174927	0.0567267
						-3	5.72534	JL102921_110821_RPB4_C2_50B.26087.26087.6	N	8.753	0.237598		2//14	28//158	6.843	1.17308	K.IDPDTK[2205.25]APNAVVITFEKEDHTLGNLIR.A	YOL005C	1	RPB11	IDPDTKAPNAVVITFEKEDHTLGNLIR	26	//17	11//85	1.91	1	R.E[111.03]KGPQVC[160.03]AK[3412.87]LFGNIQK.V	YDL140C	1	RPB1	EKGPQVCAKLFGNIQK	644	831423	839036	906958	832392	1.08958	0.123774	0.00557395
						-59	9.3129	JL102921_110821_RPB4_C2_30B.21406.21406.6	P	6.97725	0.179175	0.375	//14	30//216	6.177	1.22222	K.IDPDTK[2166.21]APNAVVITFEKEDHTLGNLIR.A	YOL005C	1	RPB11	IDPDTKAPNAVVITFEKEDHTLGNLIR	26	//18	7//115	0.80025	0.40625	R.EKGPQVCAK[3412.84]LFGNIQK.V	YDL140C	1	RPB1	EKGPQVCAKLFGNIQK	644	245196	277938	267101	279134	0.956891	-0.063574	-0.181774
						-3	0.932481	JL102921_110821_RPB4_C2_30B.22089.22089.7	N	6.76525	0.204837		//14	22//158	5.66625	0.942308	K.IDPDTK[2520.4]APNAVVITFEKEDHTLGNLIR.A	YOL005C	1	RPB11	IDPDTKAPNAVVITFEKEDHTLGNLIR	26	//17	8//93	1.099	0.566667	R.EK[425.27]GPQVC[160.03]AK[3412.84]LFGNIQK.V	YDL140C	1	RPB1	EKGPQVCAKLFGNIQK	644	244375	185248	267323	176944	1.51077	0.595286	0.477086
						-1	3.83675	JL102921_110821_RPB4_C2_30B.21418.21418.5	N	6.116	0.178158		//14	24//216	4.76425	1.05769	K.IDPDTK[2223.25]APNAVVITFEKEDHTLGNLIR.A	YOL005C	1	RPB11	IDPDTKAPNAVVITFEKEDHTLGNLIR	26	1//18	13//117	1.35175	0.633333	R.EKGPQVC[160.03]AK[3412.86]LFGNIQK.V	YDL140C	1	RPB1	EKGPQVCAKLFGNIQK	644	193248	171269	211093	167267	1.26201	0.335728	0.217528
						0	3.78598	JL102921_110821_RPB4_C2_30B.17564.17564.4	N	5.81125	0.184601		//20	20//110	4.267	1.22222	K.LKIDPDTK[2223.21]APNAVVITFEK.E	YOL005C	1	RPB11	LKIDPDTKAPNAVVITFEK	26	//18	13//90	1.54425	0.833333	R.EKGPQVC[160.03]AK[2505.41]LFGNIQK.V	YDL140C	1	RPB1	EKGPQVCAKLFGNIQK	644	161668	122904	176844	117447	1.50574	0.590471	0.472271
						-58	10.8276	JL102921_110821_RPB4_C2_30B.17509.17509.5	P	5.63075	0.171387	0.668	1//20	20//143	4.4155	1.13158	K.LKIDPDTK[2166.21]APNAVVITFEK.E	YOL005C	1	RPB11	LKIDPDTKAPNAVVITFEK	26	//18	10//115	1.21525	0.59375	R.EKGPQVCAK[2505.43]LFGNIQK.V	YDL140C	1	RPB1	EKGPQVCAKLFGNIQK	644	438421	367174	479167	355882	1.34642	0.429127	0.310927
						-58	11.049	JL102921_110821_RPB4_C2_30B.17551.17551.5	NP	5.52	0.158248	0.118	//20	16//143	3.91275	0.973684	K.LKIDPDTK[2166.21]APNAVVITFEK.E	YOL005C	1	RPB11	LKIDPDTKAPNAVVITFEK	26	//18	12//115	1.60725	0.65625	R.EKGPQVCAK[2505.43]LFGNIQK.V	YDL140C	1	RPB1	EKGPQVCAKLFGNIQK	644	542453	402817	593493	383518	1.5475	0.629938	0.511738
						-59	8.33386	JL102921_110821_RPB4_C2_30B.17496.17496.5	P	5.23725	0.14856	0.706	//20	14//143	3.754	0.921053	K.LKIDPDTK[2166.21]APNAVVITFEK.E	YOL005C	1	RPB11	LKIDPDTKAPNAVVITFEK	26	1//18	15//115	1.48325	0.8125	R.EKGPQVCAK[2505.43]LFGNIQK.V	YDL140C	1	RPB1	EKGPQVCAKLFGNIQK	644	374033	352792	408314	347251	1.17585	0.233702	0.115502
						-59	12.3065	JL102921_110821_RPB4_C2_30B.17546.17546.4	P	5.051	0.151814	0.716	//20	14//110	4.1125	0.921053	K.LKIDPDTK[2166.21]APNAVVITFEK.E	YOL005C	1	RPB11	LKIDPDTKAPNAVVITFEK	26	//18	7//89	0.9385	0.34375	R.EKGPQVCAK[2505.43]LFGNIQK.V	YDL140C	1	RPB1	EKGPQVCAKLFGNIQK	644	191519	121486	209792	112527	1.86437	0.898689	0.780489
	10	RPB11:37---RPB1:186	5.5135	-0.459746	0.459746
						1	-1.92645	JL102921_110821_RPB4_C2_30B.25649.25649.5	P	5.5135	0.16354	0.154	//17	24//160	4.7405	1.40476	K.APNAVVITFEK[1223.75]EDHTLGNLIR.A	YOL005C	1	RPB11	APNAVVITFEKEDHTLGNLIR	37	1//9	5//34	0.773	0.714286	K.LVGSWK[2743.51]K.D	YDL140C	1	RPB1	LVGSWKK	186	24753.3	34842.7	26882.2	35665.5	0.753733	-0.407875	-0.526075
						1	-0.147986	JL102921_110821_RPB4_C2_30B.25629.25629.5	P	4.6815	0.136954	0.09	//17	21//160	3.819	1.11905	K.APNAVVITFEK[1223.75]EDHTLGNLIR.A	YOL005C	1	RPB11	APNAVVITFEKEDHTLGNLIR	37	1//9	6//34	0.8625	0.785714	K.LVGSWK[2743.51]K.D	YDL140C	1	RPB1	LVGSWKK	186	23106.9	30860.8	25114.5	31456.6	0.798386	-0.324842	-0.443042
						1	-0.747354	JL102921_110821_RPB4_C2_30B.26922.26922.5	P	4.03225	0.103367	0.327	//17	13//160	3.21375	0.809524	K.APNAVVITFEK[1520.92]EDHTLGNLIR.A	YOL005C	1	RPB11	APNAVVITFEKEDHTLGNLIR	37	//9	5//38	0.8185	0.714286	K.LVGSWK[2743.51]K[425.27].D	YDL140C	1	RPB1	LVGSWKK	186	86021.2	140945	93178.1	145860	0.638819	-0.646522	-0.764722
2	RPB1---RPB2
	1	RPB1:176---RPB2:987	4.9775	-0.119275	0.119275
						0	1.40189	JL102921_110821_RPB4_C2_50B.09510.09510.4	N	4.9775	0.20114		//14	15//66	3.123	1.59091	R.HGQK[966.59]GTIGITYR.R	YOR151C	1	RPB2	HGQKGTIGITYR	987	//6	7//25	1.8545	1.7	R.K[1736.97]DGLK.L	YDL140C	1	RPB1	KDGLK	176	826834	970426	900299	977894	0.92065	-0.119275	-0.237475
	2	RPB1:789---RPB2:987	4.433	-0.147735	0.147735
						-1	5.97313	JL102921_110821_RPB4_C2_50B.15178.15178.5	N	4.433	0.153897		//17	13//107	3.07175	1.10714	R.TLPHFSK[1736.96]DDYSPESK.G	YDL140C	1	RPB1	TLPHFSKDDYSPESK	789	//14	9//69	1.36125	1	R.HGQK[2157.06]GTIGITYR.R	YOR151C	1	RPB2	HGQKGTIGITYR	987	1.15853e+06	1.38416e+06	1.26116e+06	1.39715e+06	0.902667	-0.147735	-0.265935
	3	RPB1:789---RPB2:1102	6.02975	0.432976	-0.432976
						0	2.65364	JL102921_110821_RPB4_C2_50B.12499.12499.4	N	6.02975	0.184272		//17	16//83	4.37775	1.42857	R.TLPHFSK[1643.87]DDYSPESK.G	YDL140C	1	RPB1	TLPHFSKDDYSPESK	789	//12	10//47	1.652	1.61111	R.HM[147.04]VDDK[2157.09]IHAR.A	YOR151C	1	RPB2	HMVDDKIHAR	1102	458441	396586	500894	386087	1.29736	0.375579	0.257379
						0	2.80316	JL102921_110821_RPB4_C2_50B.12492.12492.4	N	5.201	0.179425		//17	14//83	3.96025	1.28571	R.TLPHFSK[1643.87]DDYSPESK.G	YDL140C	1	RPB1	TLPHFSKDDYSPESK	789	//12	9//47	1.24075	1.05556	R.HM[147.04]VDDK[2157.09]IHAR.A	YOR151C	1	RPB2	HMVDDKIHAR	1102	470617	379861	514529	366263	1.40481	0.490373	0.372173
	4	RPB1:1350---RPB2:987	10.0917	-0.479472	0.479472
						-1	2.86931	JL102921_110821_RPB4_C2_D.21446.21446.5	N	10.0917	0.313915		//17	22//166	9.02675	1.525	R.AALYK[1736.96]EVYNVIASDGSYVNYR.H	YDL140C	1	RPB1	AALYKEVYNVIASDGSYVNYR	1350	1//14	9//69	1.065	0.818182	R.HGQK[2801.44]GTIGITYR.R	YOR151C	1	RPB2	HGQKGTIGITYR	987	559123	823603	606767	845974	0.71724	-0.479472	-0.597672
	5	RPB1:1093---RPB2:1102	3.906	0.0514763	-0.0514763
						0	0.349852	JL102921_110821_RPB4_C2_50B.08554.08554.5	N	3.906	0.174053		//12	7//61	1.067	0.833333	R.HMVDDK[1249.76]IHAR.A	YOR151C	1	RPB2	HMVDDKIHAR	1102	//9	9//49	2.839	1.75	K.K[1627.87]VTSGVPR.L	YDL140C	1	RPB1	KVTSGVPR	1093	863492	911235	941456	908457	1.03632	0.0514763	-0.0667237
	6	RPB1:1093---RPB2:987	5.004	0.124408	-0.124408
						0	2.78826	JL102921_110821_RPB4_C2_70B.07684.07684.4	N	5.004	0.166141		//14	15//61	3.5685	1.72727	R.HGQK[1249.75]GTIGITYR.R	YOR151C	1	RPB2	HGQKGTIGITYR	987	//9	6//38	1.4355	1.0625	K.K[1736.97]VTSGVPR.L	YDL140C	1	RPB1	KVTSGVPR	1093	198940	202170	216996	200726	1.08106	0.112444	-0.00575555
						0	-2.10512	JL102921_110821_RPB4_C2_C18.06709.06709.4	NP	4.72625	0.165141	0.192	//14	15//61	3.567	1.54167	R.HGQK[1249.76]GTIGITYR.R	YOR151C	1	RPB2	HGQKGTIGITYR	987	//9	7//38	1.15925	1.3125	K.K[1736.98]VTSGVPR.L	YDL140C	1	RPB1	KVTSGVPR	1093	666877	664253	727569	658020	1.10569	0.144953	0.0267533
						0	0.98227	JL102921_110821_RPB4_C2_C18.06730.06730.4	P	3.282	0.11103	0.279	//14	12//61	2.26375	1	R.HGQK[1249.76]GTIGITYR.R	YOR151C	1	RPB2	HGQKGTIGITYR	987	1//9	6//38	1.01825	0.875	K.K[1736.98]VTSGVPR.L	YDL140C	1	RPB1	KVTSGVPR	1093	676260	685807	737658	680750	1.0836	0.115827	-0.00237297
	7	RPB1:1093---RPB2:507	5.50925	0.382399	-0.382399
						-2	-4.53341	JL102921_110821_RPB4_C2_30B.05729.05729.4	NP	5.50925	0.213914	0.00197	//10	10//38	2.4155	1.5625	R.DGK[1249.76]LAKPR.Q	YOR151C	1	RPB2	DGKLAKPR	507	//9	11//42	3.09375	1.5	K.K[1290.79]VTSGVPR.L	YDL140C	1	RPB1	KVTSGVPR	1093	483544	416576	528342	405323	1.30351	0.382399	0.264199
	8	RPB1:1109---RPB2:99	6.42475	0.0105193	-0.0105193
						-1	-0.890764	JL102921_110821_RPB4_C2_C18.20054.20054.5	P	6.42475	0.175835	0.632	//15	31//193	6.3045	1.3125	K.IYVTK[1563.89]PMVNESDGVTHALYPQEAR.L	YOR151C	1	RPB2	IYVTKPMVNESDGVTHALYPQEAR	99	//13	3//60	0.12025	0.15	K.E[111.03]ILNVAK[3124.61]NM[147.04]K.T	YDL140C	1	RPB1	EILNVAKNMK	1109	438936	475125	478422	474946	1.00732	0.0105193	-0.107681
	9	RPB1:1109---RPB2:507	7.10575	0.464045	-0.464045
						0	4.21953	JL102921_110821_RPB4_C2_70B.11142.11142.6	N	7.10575	0.232336		//12	17//72	6.127	2.22727	R.LK[1290.8]EILNVAK[425.27]NM[147.04]K.T	YDL140C	1	RPB1	LKEILNVAKNMK	1109	1//10	6//32	0.97875	1	R.DGK[2120.27]LAKPR.Q	YOR151C	1	RPB2	DGKLAKPR	507	614901	457897	672743	436153	1.54245	0.625219	0.507019
						0	4.60527	JL102921_110821_RPB4_C2_70B.11122.11122.5	N	6.3315	0.271598		//12	18//91	5.12575	2.09091	R.LK[1290.77]EILNVAK[425.27]NM[147.04]K.T	YDL140C	1	RPB1	LKEILNVAKNMK	1109	1//10	6//40	1.20575	1	R.DGK[2120.24]LAKPR.Q	YOR151C	1	RPB2	DGKLAKPR	507	625956	565973	683623	554171	1.2336	0.302871	0.184671
	10	RPB1:1286---RPB2:393	4.209	0.415215	-0.415215
						0	2.31717	JL102921_110821_RPB4_C2_50B.06622.06622.5	N	4.209	0.191136		//12	7//76	2.3255	0.909091	R.K[1479.77]DQDDRDHFGK.K	YOR151C	1	RPB2	KDQDDRDHFGK	393	//10	8//43	1.8835	1.42857	R.VVM[147.04]M[147.04]K[1766.88]YDR.K	YDL140C	1	RPB1	VVMMKYDR	1286	145395	121050	158916	117231	1.35558	0.438906	0.320706
						0	5.69387	JL102921_110821_RPB4_C2_70B.05192.05192.5	N	3.33225	0.151225		//12	10//76	1.64775	0.818182	R.K[1479.78]DQDDRDHFGK.K	YOR151C	1	RPB2	KDQDDRDHFGK	393	//10	7//43	1.6845	1.14286	R.VVM[147.04]M[147.04]K[1766.89]YDR.K	YDL140C	1	RPB1	VVMMKYDR	1286	366091	313651	400029	304952	1.31178	0.391524	0.273324
	11	RPB1:1286---RPB2:934	4.99625	-0.263757	0.263757
						0	0.189131	JL102921_110821_RPB4_C2_70B.04481.04481.4	N	4.99625	0.177923		//10	11//39	3.48625	1.85714	R.VVM[147.04]M[147.04]K[1268.71]YDR.K	YDL140C	1	RPB1	VVMMKYDR	1286	2//9	9//31	1.51	1.75	R.TAYHSK[1479.77]R.D	YOR151C	1	RPB2	TAYHSKR	934	221008	316654	239949	324577	0.739267	-0.435832	-0.554032
						0	2.28513	JL102921_110821_RPB4_C2_70B.04585.04585.4	N	4.23225	0.16601		//10	9//39	3.328	1.71429	R.VVM[147.04]M[147.04]K[1268.7]YDR.K	YDL140C	1	RPB1	VVMMKYDR	1286	1//9	6//31	0.90425	0.916667	R.TAYHSK[1479.76]R.D	YOR151C	1	RPB2	TAYHSKR	934	126964	146465	138276	147348	0.938428	-0.0916824	-0.209882
	12	RPB1:1286---RPB2:987	6.447	-0.221424	0.221424
						0	0.511485	JL102921_110821_RPB4_C2_100B.07983.07983.5	N	6.447	0.245413		//14	12//72	3.85	1.68182	R.HGQK[1479.77]GTIGITYR.R	YOR151C	1	RPB2	HGQKGTIGITYR	987	//10	9//43	2.597	1.71429	R.VVM[147.04]M[147.04]K[1736.98]YDR.K	YDL140C	1	RPB1	VVMMKYDR	1286	396665	525635	431179	535436	0.805286	-0.312426	-0.430626
						0	1.65096	JL102921_110821_RPB4_C2_70B.07812.07812.5	N	5.089	0.198019		//14	10//72	2.9065	1.13636	R.HGQK[1479.76]GTIGITYR.R	YOR151C	1	RPB2	HGQKGTIGITYR	987	//10	8//43	2.1825	1.42857	R.VVM[147.04]M[147.04]K[1736.97]YDR.K	YDL140C	1	RPB1	VVMMKYDR	1286	550323	652487	599139	658140	0.910352	-0.135504	-0.253704
						0	0.511485	JL102921_110821_RPB4_C2_100B.07974.07974.5	N	4.82375	0.21468		//14	11//72	2.80725	1.18182	R.HGQK[1479.77]GTIGITYR.R	YOR151C	1	RPB2	HGQKGTIGITYR	987	//10	8//43	2.0165	1.42857	R.VVM[147.04]M[147.04]K[1736.98]YDR.K	YDL140C	1	RPB1	VVMMKYDR	1286	328290	397933	357305	402205	0.888365	-0.170776	-0.288976
						0	1.64961	JL102921_110821_RPB4_C2_50B.09867.09867.5	N	4.47125	0.15465		//14	10//72	2.43675	1.04545	R.HGQK[1479.77]GTIGITYR.R	YOR151C	1	RPB2	HGQKGTIGITYR	987	//10	8//43	2.0345	1.42857	R.VVM[147.04]M[147.04]K[1736.98]YDR.K	YDL140C	1	RPB1	VVMMKYDR	1286	763213	1.0575e+06	829059	1.08113e+06	0.766847	-0.38299	-0.50119
						0	0.0575787	JL102921_110821_RPB4_C2_D.07932.07932.5	N	4.46525	0.194057		//14	10//72	2.74775	1.13636	R.HGQK[1479.77]GTIGITYR.R	YOR151C	1	RPB2	HGQKGTIGITYR	987	//10	8//43	1.7175	1.42857	R.VVM[147.04]M[147.04]K[1736.98]YDR.K	YDL140C	1	RPB1	VVMMKYDR	1286	224972	261764	244988	263561	0.929533	-0.105422	-0.223622
	13	RPB1:1286---RPB2:864	3.14475	-0.0693746	0.0693746
						0	5.01041	JL102921_110821_RPB4_C2_30B.05545.05545.4	P	3.14475	0.121417	0.522	//10	9//37	2.38	1.5	R.VVM[147.04]M[147.04]K[1450.72]YDR.K	YDL140C	1	RPB1	VVMMKYDR	1286	//10	6//37	0.76475	0.5	R.SYM[147.04]DQEK[1479.77]K.Y	YOR151C	1	RPB2	SYMDQEKK	864	234964	267305	255943	268551	0.953051	-0.0693746	-0.187575
	14	RPB1:1286---RPB2:507	4.51025	-0.0699458	0.0699458
						0	2.02903	JL102921_110821_RPB4_C2_30B.05727.05727.4	NP	4.51025	0.176381	0.162	//10	9//39	2.3155	1.5	R.VVM[147.04]M[147.04]K[1290.79]YDR.K	YDL140C	1	RPB1	VVMMKYDR	1286	//10	6//36	2.19475	1.0625	R.DGK[1479.77]LAKPR.Q	YOR151C	1	RPB2	DGKLAKPR	507	488267	512405	532387	510538	1.0428	0.0604569	-0.0577431
						0	1.39504	JL102921_110821_RPB4_C2_30B.05728.05728.5	P	2.79475	0.105462	0.488	//10	9//47	2.078	1.3125	R.VVM[147.04]M[147.04]K[1290.79]YDR.K	YDL140C	1	RPB1	VVMMKYDR	1286	//10	4//44	0.71675	0.375	R.DGK[1479.77]LAKPR.Q	YOR151C	1	RPB2	DGKLAKPR	507	550456	679728	598955	688185	0.87034	-0.200349	-0.318549
	15	RPB1:1132---RPB2:507	14.4008	0.722757	-0.722757
						-1	2.858	JL102921_110821_RPB4_C2_50B.17711.17711.7	N	14.4008	0.422006		//17	31//163	13.2355	1.86	K.NM[147.04]K[1290.77]TPSLTVYLEPGHAADQEQAK[425.27]LIR.S	YDL140C	1	RPB1	NMKTPSLTVYLEPGHAADQEQAKLIR	1132	1//10	5//32	1.16525	0.928571	R.DGK[3629.93]LAKPR.Q	YOR151C	1	RPB2	DGKLAKPR	507	1.74138e+06	1.12163e+06	1.90731e+06	1.04193e+06	1.83056	0.872285	0.754085
						-2	0.384112	JL102921_110821_RPB4_C2_50B.17735.17735.7	N	14.019	0.394546		//17	31//163	12.883	1.84	K.NM[147.04]K[1290.78]TPSLTVYLEPGHAADQEQAK[425.27]LIR.S	YDL140C	1	RPB1	NMKTPSLTVYLEPGHAADQEQAKLIR	1132	//10	4//32	1.136	0.857143	R.DGK[3629.94]LAKPR.Q	YOR151C	1	RPB2	DGKLAKPR	507	2.26822e+06	1.28221e+06	2.48653e+06	1.1599e+06	2.14375	1.10014	0.98194
						-2	1.27136	JL102921_110821_RPB4_C2_30B.13361.13361.7	N	13.1967	0.348848		//17	28//163	11.9787	1.68	K.NM[147.04]K[1290.79]TPSLTVYLEPGHAADQEQAK[425.27]LIR.S	YDL140C	1	RPB1	NMKTPSLTVYLEPGHAADQEQAKLIR	1132	//10	4//32	1.218	0.857143	R.DGK[3629.95]LAKPR.Q	YOR151C	1	RPB2	DGKLAKPR	507	746630	562666	816781	536955	1.52114	0.605149	0.486949
						-2	0.773635	JL102921_110821_RPB4_C2_100B.14904.14904.7	N	12.5087	0.370525		//17	29//163	11.3108	1.74	K.NM[147.04]K[1290.78]TPSLTVYLEPGHAADQEQAK[425.27]LIR.S	YDL140C	1	RPB1	NMKTPSLTVYLEPGHAADQEQAKLIR	1132	//10	4//32	1.198	0.857143	R.DGK[3629.94]LAKPR.Q	YOR151C	1	RPB2	DGKLAKPR	507	841392	600557	920855	568113	1.6209	0.696797	0.578597
						-2	0.286731	JL102921_110821_RPB4_C2_100B.14882.14882.7	N	12.4223	0.377243		//17	29//163	11.4367	1.76	K.NM[147.04]K[1290.78]TPSLTVYLEPGHAADQEQAK[425.27]LIR.S	YDL140C	1	RPB1	NMKTPSLTVYLEPGHAADQEQAKLIR	1132	//10	4//32	0.9855	0.857143	R.DGK[3629.94]LAKPR.Q	YOR151C	1	RPB2	DGKLAKPR	507	790969	569694	865607	539724	1.6038	0.68149	0.56329
						-3	4.04496	JL102921_110821_RPB4_C2_30B.13401.13401.7	N	11.1188	0.310302		//17	28//163	9.98175	1.58	K.NM[147.04]K[1290.77]TPSLTVYLEPGHAADQEQAK[425.27]LIR.S	YDL140C	1	RPB1	NMKTPSLTVYLEPGHAADQEQAKLIR	1132	//10	4//32	1.137	0.857143	R.DGK[3629.92]LAKPR.Q	YOR151C	1	RPB2	DGKLAKPR	507	497824	429325	543940	417786	1.30196	0.380683	0.262483
	16	RPB1:15---RPB2:865	11.0478	-0.189788	0.189788
						-2	0.153378	JL102921_110821_RPB4_C2_100B.18385.18385.5	N	11.0478	0.315596		1//18	20//117	5.927	1.7	R.TVK[2237.16]EVQFGLFSPEEVR.A	YDL140C	1	RPB1	TVKEVQFGLFSPEEVR	15	//16	16//115	5.12075	1.63333	K.K[2271.24]YGM[147.04]SITETFEKPQR.T	YOR151C	1	RPB2	KYGMSITETFEKPQR	865	454781	544427	495059	549639	0.900699	-0.150883	-0.269083
						-2	1.30531	JL102921_110821_RPB4_C2_100B.18391.18391.5	N	10.5775	0.319741		1//18	20//117	6.02375	1.7	R.TVK[2237.15]EVQFGLFSPEEVR.A	YDL140C	1	RPB1	TVKEVQFGLFSPEEVR	15	//16	15//115	4.55375	1.43333	K.K[2271.23]YGM[147.04]SITETFEKPQR.T	YOR151C	1	RPB2	KYGMSITETFEKPQR	865	440908	554239	479636	562025	0.853408	-0.228693	-0.346893
	17	RPB1:15---RPB2:507	7.42175	-0.300627	0.300627
						0	-2.04891	JL102921_110821_RPB4_C2_30B.15147.15147.4	P	7.42175	0.25506	0.0404	//18	23//98	7.2775	1.96875	R.TVK[1037.63]EVQFGLFSPEEVR.A	YDL140C	1	RPB1	TVKEVQFGLFSPEEVR	15	//8	3//23	0.14425	0.416667	R.DGK[2271.23]LAK.P	YOR151C	1	RPB2	DGKLAK	507	492198	665285	534865	678797	0.787961	-0.343804	-0.462004
						-1	7.01775	JL102921_110821_RPB4_C2_30B.15139.15139.4	P	6.7585	0.237666	0.607	//18	21//98	6.7265	1.96875	R.TVK[1037.63]EVQFGLFSPEEVR.A	YDL140C	1	RPB1	TVKEVQFGLFSPEEVR	15	//8	1//23	0.032	0.0833333	R.DGK[2271.23]LAK.P	YOR151C	1	RPB2	DGKLAK	507	520117	665746	565658	676167	0.836565	-0.25745	-0.37565
	18	RPB1:15---RPB2:374	6.47125	-0.185748	0.185748
						-2	3.07012	JL102921_110821_RPB4_C2_50B.21677.21677.5	N	6.47125	0.172037		1//18	13//118	4.6055	1.16667	R.TVK[1765.97]EVQFGLFSPEEVR.A	YDL140C	1	RPB1	TVKEVQFGLFSPEEVR	15	1//12	12//71	1.86575	1.09091	R.K[2271.22]AFFLGYMINR.L	YOR151C	1	RPB2	KAFFLGYMINR	374	1.37635e+06	1.68408e+06	1.49781e+06	1.70362e+06	0.879193	-0.185748	-0.303948
	19	RPB1:15---RPB2:965	10.535	-0.28674	0.28674
						0	4.76719	JL102921_110821_RPB4_C2_30B.16063.16063.4	P	10.535	0.387672	0.191	//18	26//98	10.1775	2.5625	R.TVK[1054.67]EVQFGLFSPEEVR.A	YDL140C	1	RPB1	TVKEVQFGLFSPEEVR	15	//7	2//19	0.3575	0.4	K.FVK[2271.23]VR.V	YOR151C	1	RPB2	FVKVR	965	566402	690817	616410	698628	0.882315	-0.180635	-0.298835
						0	7.01526	JL102921_110821_RPB4_C2_30B.16054.16054.5	P	8.85925	0.358224	0.165	//18	20//124	8.41225	1.8125	R.TVK[1054.67]EVQFGLFSPEEVR.A	YDL140C	1	RPB1	TVKEVQFGLFSPEEVR	15	//7	2//24	0.447	0.4	K.FVK[2271.23]VR.V	YOR151C	1	RPB2	FVKVR	965	194448	271111	211204	277307	0.761626	-0.392846	-0.511046
	20	RPB1:15---RPB2:228	7.79775	-0.166955	0.166955
						-2	7.68891	JL102921_110821_RPB4_C2_50B.20839.20839.5	N	7.79775	0.217053		2//18	16//117	5.57875	1.5	R.TVK[1882.06]EVQFGLFSPEEVR.A	YDL140C	1	RPB1	TVKEVQFGLFSPEEVR	15	1//15	15//96	2.219	1	K.K[2271.21]AAPSPISHVAEIR.S	YOR151C	1	RPB2	KAAPSPISHVAEIR	228	881833	1.09497e+06	959456	1.10915e+06	0.86504	-0.209161	-0.327361
						-2	2.79561	JL102921_110821_RPB4_C2_50B.20838.20838.4	N	6.311	0.181625		1//18	13//91	3.029	0.933333	R.TVK[1882.08]EVQFGLFSPEEVR.A	YDL140C	1	RPB1	TVKEVQFGLFSPEEVR	15	//15	16//76	3.282	1.10714	K.K[2271.22]AAPSPISHVAEIR.S	YOR151C	1	RPB2	KAAPSPISHVAEIR	228	529618	623726	576649	628731	0.917164	-0.124749	-0.242949
	21	RPB1:15---RPB2:1148	11.3265	0.473647	-0.473647
						-2	2.54429	JL102921_110821_RPB4_C2_50B.23553.23553.4	N	11.3265	0.379307		//18	19//91	6.8535	1.83333	R.TVK[2128.07]EVQFGLFSPEEVR.A	YDL140C	1	RPB1	TVKEVQFGLFSPEEVR	15	//17	11//81	4.473	1.07143	R.DC[160.03]M[147.04]IAHGAASFLK[2271.24]ER.L	YOR151C	1	RPB2	DCMIAHGAASFLKER	1148	612380	479616	669697	460403	1.45459	0.540611	0.422411
						-1	2.71867	JL102921_110821_RPB4_C2_30B.19025.19025.5	N	10.9467	0.371265		//18	25//117	9.3765	2.3	R.TVK[2128.07]EVQFGLFSPEEVR.A	YDL140C	1	RPB1	TVKEVQFGLFSPEEVR	15	2//17	10//102	1.57025	0.714286	R.DC[160.03]M[147.04]IAHGAASFLK[2271.25]ER.L	YOR151C	1	RPB2	DCMIAHGAASFLKER	1148	617316	513656	674729	497411	1.35648	0.43987	0.32167
						0	4.22687	JL102921_110821_RPB4_C2_50B.23564.23564.4	N	10.6638	0.341885		//18	19//91	6.4335	1.76667	R.TVK[2128.08]EVQFGLFSPEEVR.A	YDL140C	1	RPB1	TVKEVQFGLFSPEEVR	15	//17	11//81	4.23025	1.07143	R.DC[160.03]M[147.04]IAHGAASFLK[2271.25]ER.L	YOR151C	1	RPB2	DCMIAHGAASFLKER	1148	570515	450219	623872	432671	1.44191	0.527981	0.409781
						0	0.0696478	JL102921_110821_RPB4_C2_30B.19061.19061.4	N	10.551	0.354578		1//18	19//91	6.33525	1.7	R.TVK[2128.06]EVQFGLFSPEEVR.A	YDL140C	1	RPB1	TVKEVQFGLFSPEEVR	15	//17	10//81	4.21575	1.03571	R.DC[160.03]M[147.04]IAHGAASFLK[2271.23]ER.L	YOR151C	1	RPB2	DCMIAHGAASFLKER	1148	441468	282231	483561	261806	1.84702	0.8852	0.767
						-2	2.54639	JL102921_110821_RPB4_C2_70B.22478.22478.5	N	10.209	0.354799		1//18	25//117	9.128	2.26667	R.TVK[2112.06]EVQFGLFSPEEVR.A	YDL140C	1	RPB1	TVKEVQFGLFSPEEVR	15	1//17	9//101	1.081	0.607143	R.DC[160.03]MIAHGAASFLK[2271.22]ER.L	YOR151C	1	RPB2	DCMIAHGAASFLKER	1148	479020	494087	522409	491364	1.06318	0.0883887	-0.0298113
						-1	2.89554	JL102921_110821_RPB4_C2_C18.21430.21430.5	N	10.1367	0.424016		1//18	23//117	9.114	2.1	R.TVK[2112.08]EVQFGLFSPEEVR.A	YDL140C	1	RPB1	TVKEVQFGLFSPEEVR	15	//17	8//101	1.02275	0.571429	R.DC[160.03]MIAHGAASFLK[2271.25]ER.L	YOR151C	1	RPB2	DCMIAHGAASFLKER	1148	325646	283271	355783	275974	1.28919	0.366462	0.248262
						-1	3.27138	JL102921_110821_RPB4_C2_C18.19918.19918.5	N	9.855	0.308538		2//18	28//117	8.539	2.43333	R.TVK[2128.08]EVQFGLFSPEEVR.A	YDL140C	1	RPB1	TVKEVQFGLFSPEEVR	15	2//17	9//102	1.316	0.571429	R.DC[160.03]M[147.04]IAHGAASFLK[2271.25]ER.L	YOR151C	1	RPB2	DCMIAHGAASFLKER	1148	486877	500786	530995	497873	1.06653	0.0929199	-0.0252801
						-2	3.00231	JL102921_110821_RPB4_C2_30B.20514.20514.5	N	9.74675	0.366999		1//18	22//117	8.4185	2.03333	R.TVK[2112.08]EVQFGLFSPEEVR.A	YDL140C	1	RPB1	TVKEVQFGLFSPEEVR	15	//17	8//101	1.32825	0.571429	R.DC[160.03]MIAHGAASFLK[2271.25]ER.L	YOR151C	1	RPB2	DCMIAHGAASFLKER	1148	271390	223469	296658	216083	1.37289	0.457214	0.339014
						-1	1.45875	JL102921_110821_RPB4_C2_70B.20786.20786.4	N	9.451	0.249845		//18	17//91	5.9525	1.7	R.TVK[2128.07]EVQFGLFSPEEVR.A	YDL140C	1	RPB1	TVKEVQFGLFSPEEVR	15	//17	10//81	3.4985	1.03571	R.DC[160.03]M[147.04]IAHGAASFLK[2271.24]ER.L	YOR151C	1	RPB2	DCMIAHGAASFLKER	1148	337919	233161	369931	219299	1.68688	0.754354	0.636154
						-1	4.8698	JL102921_110821_RPB4_C2_30B.19033.19033.4	N	8.07375	0.25966		//18	15//91	3.83125	1.13333	R.TVK[2128.08]EVQFGLFSPEEVR.A	YDL140C	1	RPB1	TVKEVQFGLFSPEEVR	15	1//17	12//81	4.2425	1.10714	R.DC[160.03]M[147.04]IAHGAASFLK[2271.25]ER.L	YOR151C	1	RPB2	DCMIAHGAASFLKER	1148	314657	228860	344322	217168	1.5855	0.664942	0.546742
						0	1.82588	JL102921_110821_RPB4_C2_100B.20852.20852.4	N	7.70675	0.200694		//18	15//91	4.32475	1.23333	R.TVK[2128.07]EVQFGLFSPEEVR.A	YDL140C	1	RPB1	TVKEVQFGLFSPEEVR	15	1//17	10//81	3.382	0.928571	R.DC[160.03]M[147.04]IAHGAASFLK[2271.24]ER.L	YOR151C	1	RPB2	DCMIAHGAASFLKER	1148	344638	251818	377115	239132	1.57702	0.657197	0.538997
						-1	1.58509	JL102921_110821_RPB4_C2_70B.20752.20752.4	N	7.1125	0.159785		//18	16//91	3.838	1.23333	R.TVK[2128.07]EVQFGLFSPEEVR.A	YDL140C	1	RPB1	TVKEVQFGLFSPEEVR	15	//17	9//81	3.2745	0.892857	R.DC[160.03]M[147.04]IAHGAASFLK[2271.24]ER.L	YOR151C	1	RPB2	DCMIAHGAASFLKER	1148	251396	191854	274987	183445	1.49902	0.584017	0.465817
						-1	0.637572	JL102921_110821_RPB4_C2_100B.20790.20790.4	N	7.05125	0.176378		//18	18//91	4.591	1.56667	R.TVK[2128.07]EVQFGLFSPEEVR.A	YDL140C	1	RPB1	TVKEVQFGLFSPEEVR	15	//17	8//81	2.46025	0.75	R.DC[160.03]M[147.04]IAHGAASFLK[2271.24]ER.L	YOR151C	1	RPB2	DCMIAHGAASFLKER	1148	215171	187661	235077	182891	1.28534	0.362155	0.243955
						-2	5.66542	JL102921_110821_RPB4_C2_100B.20883.20883.4	N	5.81625	0.163621		//18	14//91	3.57775	1.2	R.TVK[2128.04]EVQFGLFSPEEVR.A	YDL140C	1	RPB1	TVKEVQFGLFSPEEVR	15	1//17	9//81	2.2385	0.785714	R.DC[160.03]M[147.04]IAHGAASFLK[2271.21]ER.L	YOR151C	1	RPB2	DCMIAHGAASFLKER	1148	232445	222488	253710	219380	1.15649	0.209749	0.0915491
	22	RPB1:15---RPB2:1102	12.3845	-0.186456	0.186456
						-1	0.887971	JL102921_110821_RPB4_C2_100B.15113.15113.4	P	12.3845	0.387797	0.000939	1//18	28//93	11.739	2.75	R.TVK[1643.86]EVQFGLFSPEEVR.A	YDL140C	1	RPB1	TVKEVQFGLFSPEEVR	15	//12	7//47	0.6455	0.75	R.HM[147.04]VDDK[2271.23]IHAR.A	YOR151C	1	RPB2	HMVDDKIHAR	1102	323818	322638	353288	319622	1.10533	0.144478	0.0262778
						0	1.04657	JL102921_110821_RPB4_C2_70B.14796.14796.5	P	11.937	0.417144	0.698	1//18	32//119	11.315	2.8125	R.TVK[1643.86]EVQFGLFSPEEVR.A	YDL140C	1	RPB1	TVKEVQFGLFSPEEVR	15	//12	9//58	0.622	0.8	R.HM[147.04]VDDK[2271.23]IHAR.A	YOR151C	1	RPB2	HMVDDKIHAR	1102	699949	977963	760238	1.00048e+06	0.759876	-0.396163	-0.514363
						0	0.5048	JL102921_110821_RPB4_C2_70B.14780.14780.5	P	10.7985	0.391023	0.575	1//18	33//119	10.3758	2.8125	R.TVK[1643.86]EVQFGLFSPEEVR.A	YDL140C	1	RPB1	TVKEVQFGLFSPEEVR	15	//12	8//58	0.42275	0.5	R.HM[147.04]VDDK[2271.23]IHAR.A	YOR151C	1	RPB2	HMVDDKIHAR	1102	623942	838408	678090	855024	0.793065	-0.334488	-0.452688
						0	3.84574	JL102921_110821_RPB4_C2_100B.15094.15094.5	P	9.7705	0.349758	0.000136	2//18	29//119	9.33525	2.46875	R.TVK[1643.86]EVQFGLFSPEEVR.A	YDL140C	1	RPB1	TVKEVQFGLFSPEEVR	15	//12	7//58	0.43525	0.45	R.HM[147.04]VDDK[2271.23]IHAR.A	YOR151C	1	RPB2	HMVDDKIHAR	1102	542828	667537	590689	675590	0.87433	-0.193751	-0.311951
						0	3.84574	JL102921_110821_RPB4_C2_100B.15090.15090.5	P	9.61625	0.334921	0.053	1//18	28//119	9.08075	2.5	R.TVK[1643.86]EVQFGLFSPEEVR.A	YDL140C	1	RPB1	TVKEVQFGLFSPEEVR	15	1//12	8//58	0.5355	0.75	R.HM[147.04]VDDK[2271.23]IHAR.A	YOR151C	1	RPB2	HMVDDKIHAR	1102	530355	626878	577424	632126	0.913464	-0.13058	-0.24878
						1690	39.8273	JL102921_110821_RPB4_C2_100B.15099.15099.3	P	5.53325	0.212838	1.46e-06	1//18	14//67	5.24425	1.125	R.TVK[1643.86]EVQFGLFSPEEVR.A	YDL140C	1	RPB1	TVKEVQFGLFSPEEVR	15	//12	5//36	0.289	0.5	R.HM[147.04]VDDK[2271.23]IHAR.A	YOR151C	1	RPB2	HMVDDKIHAR	1102	432625	536877	470710	543798	0.865598	-0.208231	-0.326431
	23	RPB1:689---RPB2:987	6.0315	-0.184	0.184
						0	2.03389	JL102921_110821_RPB4_C2_70B.08641.08641.5	N	6.0315	0.283615		//14	12//74	4.04725	1.40909	R.HGQK[1336.85]GTIGITYR.R	YOR151C	1	RPB2	HGQKGTIGITYR	987	//8	11//42	1.98425	1.78571	K.KK[1736.97]VLDVTK.E	YDL140C	1	RPB1	KKVLDVTK	689	420255	543358	456986	552341	0.827363	-0.273408	-0.391608
						0	0.370514	JL102921_110821_RPB4_C2_50B.10740.10740.5	N	4.533	0.210324		//14	12//74	2.653	1.40909	R.HGQK[1336.85]GTIGITYR.R	YOR151C	1	RPB2	HGQKGTIGITYR	987	//8	10//42	1.88	1.71429	K.KK[1736.98]VLDVTK.E	YDL140C	1	RPB1	KKVLDVTK	689	1.26908e+06	1466676	1.38212e+06	1.47578e+06	0.936537	-0.0945922	-0.212792
	24	RPB1:689---RPB2:813	4.5695	-0.0551232	0.0551232
						0	5.77361	JL102921_110821_RPB4_C2_70B.10967.10967.4	N	4.5695	0.178845		//10	8//39	2.24425	1.28571	R.AM[147.04]EYLK[1336.84]FR.E	YOR151C	1	RPB2	AMEYLKFR	813	//8	9//36	2.32525	1.64286	K.KK[1479.79]VLDVTK.E	YDL140C	1	RPB1	KKVLDVTK	689	424424	478571	462372	480381	0.962512	-0.0551232	-0.173323
	25	RPB1:830---RPB2:987	7.9965	0.089763	-0.089763
						-1	10.473	JL102921_110821_RPB4_C2_D.18248.18248.4	N	7.9965	0.250482		//20	19//104	7.0585	1.58824	R.EGLIDTAVK[1736.94]TAETGYIQR.R	YDL140C	1	RPB1	EGLIDTAVKTAETGYIQR	830	1//14	8//56	0.938	0.681818	R.HGQK[2371.25]GTIGITYR.R	YOR151C	1	RPB2	HGQKGTIGITYR	987	851910	877959	929085	873039	1.0642	0.089763	-0.028437
	26	RPB1:830---RPB2:1102	8.993	0.0762895	-0.0762895
						0	0.0230646	JL102921_110821_RPB4_C2_50B.19022.19022.4	N	8.993	0.258795		1//20	26//104	8.014	1.91176	R.EGLIDTAVK[1643.87]TAETGYIQR.R	YDL140C	1	RPB1	EGLIDTAVKTAETGYIQR	830	//12	9//47	0.979	0.888889	R.HM[147.04]VDDK[2371.28]IHAR.A	YOR151C	1	RPB2	HMVDDKIHAR	1102	644503	628129	703328	620674	1.13317	0.180363	0.0621626
						0	1.40067	JL102921_110821_RPB4_C2_30B.13932.13932.5	P	8.807	0.289952	0.0282	//20	21//136	7.92625	1.75	R.EGLIDTAVK[1643.86]TAETGYIQR.R	YDL140C	1	RPB1	EGLIDTAVKTAETGYIQR	830	//12	8//58	0.88075	0.9	R.HM[147.04]VDDK[2371.28]IHAR.A	YOR151C	1	RPB2	HMVDDKIHAR	1102	495490	497911	540531	493732	1.09479	0.130649	0.0124491
						-2	0.260837	JL102921_110821_RPB4_C2_30B.13936.13936.4	N	8.4245	0.238929		1//20	21//104	7.10775	1.70588	R.EGLIDTAVK[1643.87]TAETGYIQR.R	YDL140C	1	RPB1	EGLIDTAVKTAETGYIQR	830	1//12	11//47	1.31675	0.944444	R.HM[147.04]VDDK[2371.28]IHAR.A	YOR151C	1	RPB2	HMVDDKIHAR	1102	239309	232980	261154	230186	1.13454	0.182102	0.063902
						0	5.12295	JL102921_110821_RPB4_C2_30B.13941.13941.4	NP	8.27625	0.250106	0.268	1//20	23//104	7.12375	1.66667	R.EGLIDTAVK[1643.86]TAETGYIQR.R	YDL140C	1	RPB1	EGLIDTAVKTAETGYIQR	830	//12	9//47	1.1525	0.75	R.HM[147.04]VDDK[2371.28]IHAR.A	YOR151C	1	RPB2	HMVDDKIHAR	1102	245820	240219	268249	237442	1.12974	0.175996	0.0577963
						-1	1.68513	JL102921_110821_RPB4_C2_30B.13915.13915.4	NP	7.9935	0.21909	0.0935	1//20	23//104	6.967	1.66667	R.EGLIDTAVK[1643.86]TAETGYIQR.R	YDL140C	1	RPB1	EGLIDTAVKTAETGYIQR	830	//12	10//47	1.0265	0.8	R.HM[147.04]VDDK[2371.28]IHAR.A	YOR151C	1	RPB2	HMVDDKIHAR	1102	242939	239027	265085	236450	1.1211	0.164919	0.0467189
						0	-0.265618	JL102921_110821_RPB4_C2_30B.14415.14415.5	P	7.24825	0.245201	0.367	2//20	23//136	6.8605	1.80556	R.EGLIDTAVK[1643.86]TAETGYIQR.R	YDL140C	1	RPB1	EGLIDTAVKTAETGYIQR	830	//12	5//58	0.38775	0.5	R.HM[147.04]VDDK[2371.28]IHAR.A	YOR151C	1	RPB2	HMVDDKIHAR	1102	785234	892217	855360	896268	0.954357	-0.0673988	-0.185599
						-1	2.5972	JL102921_110821_RPB4_C2_30B.14453.14453.4	P	6.73275	0.182846	0.384	2//20	25//104	6.37425	1.83333	R.EGLIDTAVK[1643.86]TAETGYIQR.R	YDL140C	1	RPB1	EGLIDTAVKTAETGYIQR	830	//12	6//47	0.3585	0.4	R.HM[147.04]VDDK[2371.28]IHAR.A	YOR151C	1	RPB2	HMVDDKIHAR	1102	377368	433831	411007	436300	0.942029	-0.0861564	-0.204356
						0	1.13757	JL102921_110821_RPB4_C2_30B.14410.14410.5	P	6.5115	0.194109	0.722	//20	19//136	6.12675	1.52778	R.EGLIDTAVK[1643.86]TAETGYIQR.R	YDL140C	1	RPB1	EGLIDTAVKTAETGYIQR	830	//12	4//58	0.38475	0.3	R.HM[147.04]VDDK[2371.28]IHAR.A	YOR151C	1	RPB2	HMVDDKIHAR	1102	738559	840629	804499	844589	0.952534	-0.0701579	-0.188358
	27	RPB1:1246---RPB2:1102	5.4755	0.0360575	-0.0360575
						-1	0.424071	JL102921_110821_RPB4_C2_70B.08268.08268.5	N	5.4755	0.170327		//17	17//155	4.422	0.973684	R.VVRPK[1643.86]SLDAETEAEEDHM[147.04]LK.K	YDL140C	1	RPB1	VVRPKSLDAETEAEEDHMLK	1246	//12	7//58	1.0535	0.888889	R.HM[147.04]VDDK[2719.39]IHAR.A	YOR151C	1	RPB2	HMVDDKIHAR	1102	107549	114585	117246	114352	1.02531	0.0360575	-0.0821425
	28	RPB1:403---RPB2:507	5.874	-0.232957	0.232957
						0	2.6735	JL102921_110821_RPB4_C2_30B.07257.07257.5	NP	5.874	0.218417	0.635	//16	15//96	4.0735	1.35714	R.NGPNEHPGAK[1290.79]YVIR.D	YDL140C	1	RPB1	NGPNEHPGAKYVIR	403	//10	5//40	1.8005	1	R.DGK[1958.06]LAKPR.Q	YOR151C	1	RPB2	DGKLAKPR	507	449213	557618	488756	564821	0.865331	-0.208677	-0.326877
						0	0.311702	JL102921_110821_RPB4_C2_30B.07284.07284.5	P	4.3675	0.182553	0.532	//16	17//96	3.5255	1.64286	R.NGPNEHPGAK[1290.79]YVIR.D	YDL140C	1	RPB1	NGPNEHPGAKYVIR	403	//10	3//40	0.842	0.5	R.DGK[1958.06]LAKPR.Q	YOR151C	1	RPB2	DGKLAKPR	507	442943	566888	481727	575755	0.836688	-0.257238	-0.375438
	29	RPB1:403---RPB2:886	12.1037	0.308511	-0.308511
						0	0.417446	JL102921_110821_RPB4_C2_50B.14359.14359.4	N	12.1037	0.365656		//18	32//117	10.112	2.47368	R.M[147.04]K[1958.06]HGTYDKLDDDGLIAPGVR.V	YOR151C	1	RPB2	MKHGTYDKLDDDGLIAPGVR	886	//16	10//73	1.99175	0.846154	R.NGPNEHPGAK[2623.35]YVIR.D	YDL140C	1	RPB1	NGPNEHPGAKYVIR	403	318468	240010	348391	229044	1.52107	0.605084	0.486884
						-2	3.7206	JL102921_110821_RPB4_C2_50B.14342.14342.4	N	12.07	0.375148		//18	30//117	9.64175	2.28947	R.M[147.04]K[1958.04]HGTYDKLDDDGLIAPGVR.V	YOR151C	1	RPB2	MKHGTYDKLDDDGLIAPGVR	886	1//16	10//73	2.42825	1.11538	R.NGPNEHPGAK[2623.34]YVIR.D	YDL140C	1	RPB1	NGPNEHPGAKYVIR	403	248291	163592	271906	152607	1.78174	0.833285	0.715085
						-1	7.3529	JL102921_110821_RPB4_C2_50B.14364.14364.4	N	11.8618	0.363172		//18	30//117	9.617	2.13158	R.M[147.04]K[1958.03]HGTYDKLDDDGLIAPGVR.V	YOR151C	1	RPB2	MKHGTYDKLDDDGLIAPGVR	886	//16	13//73	2.24475	1.03846	R.NGPNEHPGAK[2623.32]YVIR.D	YDL140C	1	RPB1	NGPNEHPGAKYVIR	403	366579	264001	401171	250109	1.60399	0.681662	0.563462
						0	4.02699	JL102921_110821_RPB4_C2_50B.14788.14788.5	N	9.451	0.291239		//18	24//154	7.6115	1.73684	R.MK[1958.07]HGTYDKLDDDGLIAPGVR.V	YOR151C	1	RPB2	MKHGTYDKLDDDGLIAPGVR	886	//16	11//93	1.8395	0.961538	R.NGPNEHPGAK[2607.37]YVIR.D	YDL140C	1	RPB1	NGPNEHPGAKYVIR	403	654615	668107	713997	663652	1.07586	0.105491	-0.0127088
						0	3.16688	JL102921_110821_RPB4_C2_50B.14796.14796.5	N	8.69725	0.267258		//18	24//154	6.9825	1.55263	R.MK[1958.04]HGTYDKLDDDGLIAPGVR.V	YOR151C	1	RPB2	MKHGTYDKLDDDGLIAPGVR	886	//16	12//93	1.71475	0.923077	R.NGPNEHPGAK[2607.34]YVIR.D	YDL140C	1	RPB1	NGPNEHPGAKYVIR	403	698900	739934	761975	737933	1.03258	0.0462528	-0.0719472
						-1	1.24644	JL102921_110821_RPB4_C2_50B.14772.14772.5	N	8.18175	0.26047		//18	24//154	6.578	1.65789	R.MK[1958.05]HGTYDKLDDDGLIAPGVR.V	YOR151C	1	RPB2	MKHGTYDKLDDDGLIAPGVR	886	//16	12//93	1.60375	0.961538	R.NGPNEHPGAK[2607.35]YVIR.D	YDL140C	1	RPB1	NGPNEHPGAKYVIR	403	780773	845722	851004	845464	1.00655	0.00942338	-0.108777
						-1	1.52567	JL102921_110821_RPB4_C2_50B.07374.07374.4	N	4.72625	0.200074		//16	11//74	2.73075	1	R.NGPNEHPGAK[1401.71]YVIR.D	YDL140C	1	RPB1	NGPNEHPGAKYVIR	403	//8	5//33	1.9955	1.14286	R.M[147.04]K[1958.05]HGTYDK.L	YOR151C	1	RPB2	MKHGTYDK	886	90531.2	78226.5	98915.7	76143.9	1.29906	0.377472	0.259272
						-1	7.12208	JL102921_110821_RPB4_C2_C18.11292.11292.6	P	2.945	0.0896663	0.622	//18	12//154	2.71675	0.575	R.MK[1958.06]HGTYDKLDDDGLIAPGVR.V	YOR151C	1	RPB2	MKHGTYDKLDDDGLIAPGVR	886	//16	4//93	0.22825	0.142857	R.NGPNEHPGAK[2607.36]YVIR.D	YDL140C	1	RPB1	NGPNEHPGAKYVIR	403	434812	533644	473162	539984	0.87625	-0.190585	-0.308785
	30	RPB1:403---RPB2:987	7.23575	-0.0320303	0.0320303
						0	3.27929	JL102921_110821_RPB4_C2_70B.09334.09334.4	N	7.23575	0.213243		//16	14//73	5.615	1.57692	R.NGPNEHPGAK[1736.97]YVIR.D	YDL140C	1	RPB1	NGPNEHPGAKYVIR	403	1//14	11//56	1.62075	1.22727	R.HGQK[1958.05]GTIGITYR.R	YOR151C	1	RPB2	HGQKGTIGITYR	987	199700	229361	217505	230645	0.943029	-0.0846266	-0.202827
						0	0.497645	JL102921_110821_RPB4_C2_70B.09354.09354.4	N	6.67625	0.209166		//16	16//73	5.34675	1.76923	R.NGPNEHPGAK[1736.98]YVIR.D	YDL140C	1	RPB1	NGPNEHPGAKYVIR	403	//14	9//56	1.3295	1.04545	R.HGQK[1958.06]GTIGITYR.R	YOR151C	1	RPB2	HGQKGTIGITYR	987	227743	244987	248249	244736	1.01436	0.0205661	-0.0976339
	31	RPB1:403---RPB2:655	6.14225	-0.0465437	0.0465437
						0	0.836872	JL102921_110821_RPB4_C2_50B.07231.07231.5	N	6.14225	0.216174		//16	16//99	4.96125	1.73077	R.NGPNEHPGAK[1059.66]YVIR.D	YDL140C	1	RPB1	NGPNEHPGAKYVIR	403	//7	5//34	1.181	0.833333	R.K[1958.05]GHIAK.L	YOR151C	1	RPB2	KGHIAK	655	335594	372248	365675	373041	0.980255	-0.0287715	-0.146971
						-1	7.92028	JL102921_110821_RPB4_C2_30B.06465.06465.5	N	4.8625	0.177444		//16	13//99	3.6695	1.07692	R.NGPNEHPGAK[1059.64]YVIR.D	YDL140C	1	RPB1	NGPNEHPGAKYVIR	403	//7	3//34	1.193	0.666667	R.K[1958.04]GHIAK.L	YOR151C	1	RPB2	KGHIAK	655	434217	617625	471485	632723	0.745168	-0.424361	-0.542561
						0	3.58887	JL102921_110821_RPB4_C2_70B.05784.05784.5	N	4.72075	0.173554		//16	14//99	3.75825	1.42308	R.NGPNEHPGAK[1059.67]YVIR.D	YDL140C	1	RPB1	NGPNEHPGAKYVIR	403	//7	3//34	0.9625	0.666667	R.K[1958.07]GHIAK.L	YOR151C	1	RPB2	KGHIAK	655	449656	403943	491114	395192	1.24272	0.313502	0.195302
	32	RPB1:403---RPB2:1102	8.4965	0.0349913	-0.0349913
						0	-0.230152	JL102921_110821_RPB4_C2_100B.07497.07497.4	NP	8.4965	0.22463	6.97e-06	//16	16//73	5.318	1.64286	R.NGPNEHPGAK[1643.86]YVIR.D	YDL140C	1	RPB1	NGPNEHPGAKYVIR	403	//12	13//47	3.1785	1.7	R.HM[147.04]VDDK[1958.06]IHAR.A	YOR151C	1	RPB2	HMVDDKIHAR	1102	148700	131033	162441	127876	1.27031	0.345176	0.226976
						0	1.0663	JL102921_110821_RPB4_C2_70B.07370.07370.4	N	8.39275	0.230687		1//16	15//73	4.9065	1.61538	R.NGPNEHPGAK[1643.87]YVIR.D	YDL140C	1	RPB1	NGPNEHPGAKYVIR	403	//12	14//47	3.48625	2.05556	R.HM[147.04]VDDK[1958.06]IHAR.A	YOR151C	1	RPB2	HMVDDKIHAR	1102	119563	110662	130547	108673	1.20129	0.264582	0.146382
						-1	0.725212	JL102921_110821_RPB4_C2_100B.07487.07487.4	NP	6.732	0.225124	0.0105	//16	12//73	3.50375	1.07143	R.NGPNEHPGAK[1643.86]YVIR.D	YDL140C	1	RPB1	NGPNEHPGAKYVIR	403	//12	13//47	3.22825	1.7	R.HM[147.04]VDDK[1958.06]IHAR.A	YOR151C	1	RPB2	HMVDDKIHAR	1102	85195.8	78655.9	93024.9	77217.6	1.20471	0.268687	0.150487
						-2	8.87043	JL102921_110821_RPB4_C2_50B.11491.11491.5	N	4.8785	0.171004		//16	16//93	3.91225	1.76923	R.NGPNEHPGAK[1627.84]YVIR.D	YDL140C	1	RPB1	NGPNEHPGAKYVIR	403	//12	8//56	0.96625	1	R.HMVDDK[1958.03]IHAR.A	YOR151C	1	RPB2	HMVDDKIHAR	1102	833831	1.03098e+06	907282	1.04393e+06	0.869103	-0.2024	-0.3206
						0	-0.174774	JL102921_110821_RPB4_C2_100B.07653.07653.5	P	4.67925	0.131951	0.00627	//16	15//93	2.866	1.35714	R.NGPNEHPGAK[1643.86]YVIR.D	YDL140C	1	RPB1	NGPNEHPGAKYVIR	403	//12	9//58	1.81325	1.25	R.HM[147.04]VDDK[1958.06]IHAR.A	YOR151C	1	RPB2	HMVDDKIHAR	1102	836287	1120074	908908	1.14197e+06	0.795915	-0.329313	-0.447513
						0	4.00495	JL102921_110821_RPB4_C2_100B.07470.07470.5	P	3.79825	0.115036	0.716	//16	11//93	1.94425	0.785714	R.NGPNEHPGAK[1643.86]YVIR.D	YDL140C	1	RPB1	NGPNEHPGAKYVIR	403	//12	8//58	1.854	1.2	R.HM[147.04]VDDK[1958.06]IHAR.A	YOR151C	1	RPB2	HMVDDKIHAR	1102	253587	300905	276078	303534	0.909545	-0.136784	-0.254984
	33	RPB1:403---RPB2:393	6.01975	-0.110788	0.110788
						-2	6.90281	JL102921_110821_RPB4_C2_70B.06700.06700.5	N	6.01975	0.208994		//16	17//93	3.79725	1.53846	R.NGPNEHPGAK[1766.86]YVIR.D	YDL140C	1	RPB1	NGPNEHPGAKYVIR	403	//12	10//72	2.2225	0.818182	R.K[1958.03]DQDDRDHFGK.K	YOR151C	1	RPB2	KDQDDRDHFGK	393	128130	156499	139440	158290	0.880917	-0.182922	-0.301122
						-1	4.83478	JL102921_110821_RPB4_C2_70B.06688.06688.5	N	5.436	0.182713		1//16	16//93	3.5445	1.46154	R.NGPNEHPGAK[1766.86]YVIR.D	YDL140C	1	RPB1	NGPNEHPGAKYVIR	403	//12	9//72	1.8915	0.772727	R.K[1958.04]DQDDRDHFGK.K	YOR151C	1	RPB2	KDQDDRDHFGK	393	120885	149544	131533	151429	0.868607	-0.203225	-0.321425
						-2	1.73936	JL102921_110821_RPB4_C2_50B.08470.08470.5	N	4.568	0.157314		//16	14//93	2.98675	1.19231	R.NGPNEHPGAK[1766.87]YVIR.D	YDL140C	1	RPB1	NGPNEHPGAKYVIR	403	//12	8//72	1.58125	0.727273	R.K[1958.05]DQDDRDHFGK.K	YOR151C	1	RPB2	KDQDDRDHFGK	393	244491	257640	266570	256815	1.03798	0.0537828	-0.0644172
	34	RPB1:533---RPB2:987	8.01525	-0.344781	0.344781
						0	0.169674	JL102921_110821_RPB4_C2_70B.09375.09375.5	N	8.01525	0.323522		//14	18//77	6.70575	2.59091	R.HGQK[1036.68]GTIGITYR.R	YOR151C	1	RPB2	HGQKGTIGITYR	987	//6	5//31	1.3095	1.2	R.K[1736.98]LTLR.D	YDL140C	1	RPB1	KLTLR	533	713652	1.00185e+06	775064	1.02529e+06	0.755944	-0.403649	-0.521849
						0	-1.27315	JL102921_110821_RPB4_C2_100B.09437.09437.5	NP	7.4955	0.364931	0.0172	//14	17//77	6.15025	2	R.HGQK[1036.68]GTIGITYR.R	YOR151C	1	RPB2	HGQKGTIGITYR	987	//6	6//31	1.34525	1.3	R.K[1736.98]LTLR.D	YDL140C	1	RPB1	KLTLR	533	290665	378782	316034	385303	0.820222	-0.285914	-0.404114
	35	RPB1:533---RPB2:1102	3.61675	-0.456596	0.456596
						0	0.292608	JL102921_110821_RPB4_C2_100B.07348.07348.5	P	3.61675	0.134242	0.0551	//12	14//66	1.94125	1.5	R.HM[147.04]VDDK[1036.68]IHAR.A	YOR151C	1	RPB2	HMVDDKIHAR	1102	//6	6//32	1.6755	1.6	R.K[1643.86]LTLR.D	YDL140C	1	RPB1	KLTLR	533	356455	517494	386921	530972	0.728704	-0.456596	-0.574796
	36	RPB1:705---RPB2:987	4.7285	-0.245533	0.245533
						0	1.03111	JL102921_110821_RPB4_C2_70B.11054.11054.5	N	4.7285	0.152648		//18	18//115	3.7465	1.1	K.EAQANLLTAK[1736.97]HGM[147.04]TLR.E	YDL140C	1	RPB1	EAQANLLTAKHGMTLR	705	//14	8//69	0.982	0.818182	R.HGQK[2176.18]GTIGITYR.R	YOR151C	1	RPB2	HGQKGTIGITYR	987	535818	661001	583035	669165	0.871287	-0.19878	-0.31698
						0	5.36562	JL102921_110821_RPB4_C2_30B.10506.10506.5	P	4.64425	0.13772	0.107	//18	16//115	3.57375	1.125	K.EAQANLLTAK[1736.98]HGM[147.04]TLR.E	YDL140C	1	RPB1	EAQANLLTAKHGMTLR	705	//14	9//69	1.0705	0.791667	R.HGQK[2176.19]GTIGITYR.R	YOR151C	1	RPB2	HGQKGTIGITYR	987	112955	152819	122745	155935	0.787157	-0.345276	-0.463476
						674	-104.89	JL102921_110821_RPB4_C2_30B.10469.10469.4	P	0.921	0.0286385	0.369	//18	9//89	0.77325	0.34375	K.EAQANLLTAK[1736.98]HGM[147.04]TLR.E	YDL140C	1	RPB1	EAQANLLTAKHGMTLR	705	//14	4//56	0.14775	0.25	R.HGQK[2176.19]GTIGITYR.R	YOR151C	1	RPB2	HGQKGTIGITYR	987	122732	150814	133554	152623	0.875062	-0.192542	-0.310742
	37	RPB1:1102---RPB2:507	10.2733	1.08004	-1.08004
						0	0.489507	JL102921_110821_RPB4_C2_70B.10279.10279.4	N	10.2733	0.417196		//9	19//43	7.13875	3.8125	R.LK[1290.78]EILNVAK.N	YDL140C	1	RPB1	LKEILNVAK	1102	//10	9//36	3.1345	1.78571	R.DGK[1433.9]LAKPR.Q	YOR151C	1	RPB2	DGKLAKPR	507	802367	441359	879741	396828	2.21693	1.14856	1.03036
						0	2.05171	JL102921_110821_RPB4_C2_C18.09425.09425.4	NP	10.2238	0.356092	0.0132	//9	19//43	7.1315	3.38889	R.LK[1290.79]EILNVAK.N	YDL140C	1	RPB1	LKEILNVAK	1102	//10	10//36	3.09225	1.625	R.DGK[1433.91]LAKPR.Q	YOR151C	1	RPB2	DGKLAKPR	507	1.08682e+06	702714	1.19035e+06	653249	1.82221	0.865686	0.747486
						0	-0.736131	JL102921_110821_RPB4_C2_50B.12811.12811.4	NP	9.5085	0.38031	0.713	//9	18//43	6.3665	3	R.LK[1290.79]EILNVAK.N	YDL140C	1	RPB1	LKEILNVAK	1102	//10	9//36	3.142	1.5625	R.DGK[1433.91]LAKPR.Q	YOR151C	1	RPB2	DGKLAKPR	507	1.23109e+06	1.01808e+06	1.34566e+06	985034	1.3661	0.450067	0.331867
						0	-2.17794	JL102921_110821_RPB4_C2_100B.10268.10268.5	NP	8.2665	0.287595	8.09e-06	//9	16//52	6.50675	2.38889	R.LK[1290.79]EILNVAK.N	YDL140C	1	RPB1	LKEILNVAK	1102	1//10	7//44	1.75975	1.125	R.DGK[1433.91]LAKPR.Q	YOR151C	1	RPB2	DGKLAKPR	507	644808	270174	708015	225641	3.13779	1.64975	1.53155
						0	0.154966	JL102921_110821_RPB4_C2_D.09885.09885.4	N	8.2445	0.346175		//9	17//43	5.14675	2.875	R.LK[1290.78]EILNVAK.N	YDL140C	1	RPB1	LKEILNVAK	1102	//10	9//36	3.09775	1.78571	R.DGK[1433.9]LAKPR.Q	YOR151C	1	RPB2	DGKLAKPR	507	968677	765713	1.05926e+06	736051	1.43911	0.525176	0.406976
						0	1.87556	JL102921_110821_RPB4_C2_50B.12821.12821.5	N	8.021	0.258329		//9	17//52	6.3955	3.125	R.LK[1290.78]EILNVAK.N	YDL140C	1	RPB1	LKEILNVAK	1102	1//10	7//44	1.6255	1.28571	R.DGK[1433.9]LAKPR.Q	YOR151C	1	RPB2	DGKLAKPR	507	1.48264e+06	646040	1.62767e+06	546212	2.97993	1.57528	1.45708
						0	2.72438	JL102921_110821_RPB4_C2_D.09874.09874.5	N	7.94125	0.274437		//9	16//52	6.4405	2.6875	R.LK[1290.79]EILNVAK.N	YDL140C	1	RPB1	LKEILNVAK	1102	1//10	6//44	1.50075	1	R.DGK[1433.91]LAKPR.Q	YOR151C	1	RPB2	DGKLAKPR	507	471766	227049	517653	197508	2.62093	1.39008	1.27188
						0	0.842589	JL102921_110821_RPB4_C2_70B.10280.10280.5	N	7.81675	0.254075		//9	16//52	6.18125	2.6875	R.LK[1290.79]EILNVAK.N	YDL140C	1	RPB1	LKEILNVAK	1102	1//10	7//44	1.6355	1.07143	R.DGK[1433.91]LAKPR.Q	YOR151C	1	RPB2	DGKLAKPR	507	802297	403678	880121	355255	2.47743	1.30885	1.19065
						0	4.6931	JL102921_110821_RPB4_C2_50B.12824.12824.3	N	7.5365	0.285842		//9	12//34	5.9955	2.5	R.LK[1290.77]EILNVAK.N	YDL140C	1	RPB1	LKEILNVAK	1102	//10	8//28	1.541	1.21429	R.DGK[1433.89]LAKPR.Q	YOR151C	1	RPB2	DGKLAKPR	507	791019	518392	866286	483108	1.79315	0.842498	0.724298
						0	1.72504	JL102921_110821_RPB4_C2_C18.09428.09428.5	NP	7.48625	0.232427	0.105	//9	15//52	5.546	2.16667	R.LK[1290.79]EILNVAK.N	YDL140C	1	RPB1	LKEILNVAK	1102	//10	6//44	1.94025	1.0625	R.DGK[1433.91]LAKPR.Q	YOR151C	1	RPB2	DGKLAKPR	507	1456515	703391	1.59816e+06	612435	2.60951	1.38378	1.26558
						0	3.85674	JL102921_110821_RPB4_C2_50B.12878.12878.3	N	7.3405	0.261474		//9	12//34	5.974	2.5	R.LK[1290.78]EILNVAK.N	YDL140C	1	RPB1	LKEILNVAK	1102	//10	7//28	1.3665	0.928571	R.DGK[1433.9]LAKPR.Q	YOR151C	1	RPB2	DGKLAKPR	507	1.75168e+06	1.18985e+06	1.91785e+06	1.11605e+06	1.71842	0.781087	0.662887
						0	-0.624618	JL102921_110821_RPB4_C2_100B.10259.10259.4	NP	6.958	0.317181	0.00422	//9	16//43	4.0745	2.55556	R.LK[1290.79]EILNVAK.N	YDL140C	1	RPB1	LKEILNVAK	1102	//10	8//36	2.8835	1.5	R.DGK[1433.91]LAKPR.Q	YOR151C	1	RPB2	DGKLAKPR	507	444441	332703	486227	317166	1.53303	0.61639	0.49819
						0	2.97776	JL102921_110821_RPB4_C2_C18.09433.09433.3	NP	6.78475	0.231368	0.0291	//9	11//34	5.5165	2	R.LK[1290.79]EILNVAK.N	YDL140C	1	RPB1	LKEILNVAK	1102	1//10	9//28	1.26825	1	R.DGK[1433.91]LAKPR.Q	YOR151C	1	RPB2	DGKLAKPR	507	1.00077e+06	563989	1.09711e+06	509843	2.15187	1.10559	0.987388
						435	-151.837	JL102921_110821_RPB4_C2_C18.09497.09497.4	P	6.68625	0.218526	0.104	1//9	13//43	5.01325	1.88889	R.LK[1290.79]EILNVAK.N	YDL140C	1	RPB1	LKEILNVAK	1102	//10	5//36	1.673	0.8125	R.DGK[1433.91]LAKPR.Q	YOR151C	1	RPB2	DGKLAKPR	507	1.6212e+06	744093	1.77933e+06	638835	2.78527	1.47782	1.35962
	38	RPB1:452---RPB2:655	4.40625	0.0685771	-0.0685771
						0	0.627419	JL102921_110821_RPB4_C2_100B.04814.04814.5	N	4.40625	0.178088		1//14	15//86	2.429	1.36364	R.Q[111.03]PSLHK[1059.66]M[147.04]SM[147.04]M[147.04]AHR.V	YDL140C	1	RPB1	QPSLHKMSMMAHR	452	//7	8//34	1.97725	1.41667	R.K[1990.96]GHIAK.L	YOR151C	1	RPB2	KGHIAK	655	294487	307496	321116	306210	1.04868	0.0685771	-0.0496229
	39	RPB1:452---RPB2:987	5.41175	-0.435298	0.435298
						0	0.479614	JL102921_110821_RPB4_C2_100B.08089.08089.5	N	5.41175	0.184843		//14	8//81	1.72625	0.681818	R.Q[111.03]PSLHK[1736.97]M[147.04]SM[147.04]M[147.04]AHR.V	YDL140C	1	RPB1	QPSLHKMSMMAHR	452	//14	11//69	3.6855	1.5	R.HGQK[1990.96]GTIGITYR.R	YOR151C	1	RPB2	HGQKGTIGITYR	987	418337	829167	451396	867942	0.520077	-0.943204	-1.0614
						0	1.24099	JL102921_110821_RPB4_C2_70B.07946.07946.5	N	5.405	0.172849		//14	9//81	1.92575	0.863636	R.Q[111.03]PSLHK[1736.98]M[147.04]SM[147.04]M[147.04]AHR.V	YDL140C	1	RPB1	QPSLHKMSMMAHR	452	1//14	13//69	3.47925	1.72727	R.HGQK[1990.97]GTIGITYR.R	YOR151C	1	RPB2	HGQKGTIGITYR	987	311481	511639	337380	529567	0.637087	-0.650438	-0.768638
						0	0.388186	JL102921_110821_RPB4_C2_100B.08088.08088.6	N	5.31375	0.257987		//14	7//64	1.19225	0.636364	R.Q[111.03]PSLHK[1736.98]M[147.04]SM[147.04]M[147.04]AHR.V	YDL140C	1	RPB1	QPSLHKMSMMAHR	452	//14	11//56	4.1215	1.63636	R.HGQK[1990.96]GTIGITYR.R	YOR151C	1	RPB2	HGQKGTIGITYR	987	539590	908084	584192	941393	0.620561	-0.688355	-0.806555
						0	0.766382	JL102921_110821_RPB4_C2_D.07966.07966.5	N	5.257	0.176315		//14	9//81	1.781	0.863636	R.Q[111.03]PSLHK[1736.97]M[147.04]SM[147.04]M[147.04]AHR.V	YDL140C	1	RPB1	QPSLHKMSMMAHR	452	1//14	11//69	3.476	1.40909	R.HGQK[1990.96]GTIGITYR.R	YOR151C	1	RPB2	HGQKGTIGITYR	987	225731	306088	245287	312386	0.785205	-0.348859	-0.467059
						-1	3.69441	JL102921_110821_RPB4_C2_50B.09992.09992.5	N	4.8655	0.154211		//14	8//81	1.65075	0.681818	R.Q[111.03]PSLHK[1736.96]M[147.04]SM[147.04]M[147.04]AHR.V	YDL140C	1	RPB1	QPSLHKMSMMAHR	452	//14	11//69	3.21475	1.5	R.HGQK[1990.95]GTIGITYR.R	YOR151C	1	RPB2	HGQKGTIGITYR	987	592284	899855	642420	926389	0.693467	-0.528101	-0.646301
						-1	2.18786	JL102921_110821_RPB4_C2_100B.08153.08153.6	N	4.45425	0.234022		//14	6//64	1.09575	0.590909	R.Q[111.03]PSLHK[1736.98]M[147.04]SM[147.04]M[147.04]AHR.V	YDL140C	1	RPB1	QPSLHKMSMMAHR	452	//14	10//56	3.3585	1.31818	R.HGQK[1990.97]GTIGITYR.R	YOR151C	1	RPB2	HGQKGTIGITYR	987	301523	417550	327539	426862	0.767319	-0.382102	-0.500302
						0	1.44712	JL102921_110821_RPB4_C2_70B.07974.07974.6	N	4.36175	0.205003		//14	6//64	1.27375	0.590909	R.Q[111.03]PSLHK[1736.98]M[147.04]SM[147.04]M[147.04]AHR.V	YDL140C	1	RPB1	QPSLHKMSMMAHR	452	1//14	10//56	3.088	1.18182	R.HGQK[1990.97]GTIGITYR.R	YOR151C	1	RPB2	HGQKGTIGITYR	987	331736	498221	359887	512484	0.70224	-0.509964	-0.628164
						0	1.9525	JL102921_110821_RPB4_C2_100B.08118.08118.4	N	4.18225	0.182819		//14	8//64	1.703	0.818182	R.Q[111.03]PSLHK[1736.98]M[147.04]SM[147.04]M[147.04]AHR.V	YDL140C	1	RPB1	QPSLHKMSMMAHR	452	//14	11//56	2.47925	1.5	R.HGQK[1990.97]GTIGITYR.R	YOR151C	1	RPB2	HGQKGTIGITYR	987	104341	121266	113626	122085	0.930713	-0.103591	-0.221791
						0	0.644175	JL102921_110821_RPB4_C2_50B.09991.09991.6	N	4.1735	0.207122		//14	7//64	1.402	0.909091	R.Q[111.03]PSLHK[1736.98]M[147.04]SM[147.04]M[147.04]AHR.V	YDL140C	1	RPB1	QPSLHKMSMMAHR	452	1//14	10//56	2.7715	1.18182	R.HGQK[1990.96]GTIGITYR.R	YOR151C	1	RPB2	HGQKGTIGITYR	987	966596	1.34276e+06	1.04995e+06	1.37305e+06	0.764682	-0.387068	-0.505268
						-2	4.52312	JL102921_110821_RPB4_C2_D.07967.07967.6	N	4.15825	0.205895		//14	7//64	1.1565	0.636364	R.Q[111.03]PSLHK[1736.96]M[147.04]SM[147.04]M[147.04]AHR.V	YDL140C	1	RPB1	QPSLHKMSMMAHR	452	1//14	8//56	3.00175	1	R.HGQK[1990.95]GTIGITYR.R	YOR151C	1	RPB2	HGQKGTIGITYR	987	273698	367985	297448	375295	0.792569	-0.335391	-0.453591
						0	1.67653	JL102921_110821_RPB4_C2_70B.07980.07980.6	N	4.11725	0.197612		//14	6//64	1.06425	0.590909	R.Q[111.03]PSLHK[1736.98]M[147.04]SM[147.04]M[147.04]AHR.V	YDL140C	1	RPB1	QPSLHKMSMMAHR	452	1//14	10//56	3.053	1.18182	R.HGQK[1990.97]GTIGITYR.R	YOR151C	1	RPB2	HGQKGTIGITYR	987	354006	506276	384356	518869	0.740759	-0.432924	-0.551124
						-1	4.83697	JL102921_110821_RPB4_C2_100B.08133.08133.4	N	3.41175	0.168294		//14	6//64	1.3275	0.590909	R.Q[111.03]PSLHK[1736.96]M[147.04]SM[147.04]M[147.04]AHR.V	YDL140C	1	RPB1	QPSLHKMSMMAHR	452	//14	8//56	2.08425	1	R.HGQK[1990.95]GTIGITYR.R	YOR151C	1	RPB2	HGQKGTIGITYR	987	87719.1	90588.3	95663.4	90101	1.06173	0.0864231	-0.0317769
	40	RPB1:452---RPB2:886	7.365	0.742481	-0.742481
						-1	13.3896	JL102921_110821_RPB4_C2_100B.10111.10111.5	N	7.365	0.267998		//18	17//154	6.4435	1.28947	R.M[147.04]K[1991.94]HGTYDKLDDDGLIAPGVR.V	YOR151C	1	RPB2	MKHGTYDKLDDDGLIAPGVR	886	//15	7//88	0.9215	0.583333	R.QPSLHK[2623.3]MSM[147.04]M[147.04]AHR.V	YDL140C	1	RPB1	QPSLHKMSMMAHR	452	218942	152124	239669	143253	1.67305	0.742481	0.624281
	41	RPB1:1205---RPB2:1102	5.97275	-0.472992	0.472992
						0	5.05494	JL102921_110821_RPB4_C2_30B.07397.07397.4	NP	5.97275	0.193569	0.00818	//18	15//88	3.47425	1.125	R.AAM[147.04]NDK[1643.86]DLTM[147.04]GQVGER.I	YDL140C	1	RPB1	AAMNDKDLTMGQVGER	1205	//12	12//47	2.4985	1.45	R.HM[147.04]VDDK[2174.05]IHAR.A	YOR151C	1	RPB2	HMVDDKIHAR	1102	105764	163860	114678	168927	0.678865	-0.558802	-0.677002
						-1	5.42277	JL102921_110821_RPB4_C2_30B.07384.07384.5	P	5.65925	0.198236	0.0727	//18	19//113	5.00725	1.59375	R.AAM[147.04]NDK[1643.86]DLTM[147.04]GQVGER.I	YDL140C	1	RPB1	AAMNDKDLTMGQVGER	1205	//12	7//58	0.652	0.7	R.HM[147.04]VDDK[2174.05]IHAR.A	YOR151C	1	RPB2	HMVDDKIHAR	1102	292398	384281	317878	391176	0.812622	-0.299344	-0.417544
						-1	3.79057	JL102921_110821_RPB4_C2_30B.07406.07406.4	P	2.2665	0.0808526	0.00581	//18	9//88	1.4255	0.40625	R.AAM[147.04]NDK[1643.86]DLTM[147.04]GQVGER.I	YDL140C	1	RPB1	AAMNDKDLTMGQVGER	1205	//12	7//47	0.841	0.55	R.HM[147.04]VDDK[2174.05]IHAR.A	YOR151C	1	RPB2	HMVDDKIHAR	1102	98373.8	152607	106663	157340	0.677912	-0.56083	-0.67903
	42	RPB1:343---RPB2:1102	3.88375	0.356177	-0.356177
						0	2.40048	JL102921_110821_RPB4_C2_30B.05542.05542.5	P	3.88375	0.115974	0.637	//12	9//63	2.13	1.2	R.HM[147.04]VDDK[1197.67]IHAR.A	YOR151C	1	RPB2	HMVDDKIHAR	1102	//9	7//36	1.75375	1.21429	R.GNLM[147.04]GK[1643.86]R.V	YDL140C	1	RPB1	GNLMGKR	343	1.56902e+06	1373393	1.71412e+06	1.33912e+06	1.28003	0.356177	0.237977
	43	RPB1:343---RPB2:934	3.85875	0.185043	-0.185043
						0	0.557724	JL102921_110821_RPB4_C2_70B.03976.03976.4	N	3.85875	0.160217		//9	8//33	2.2095	1.5	R.TAYHSK[1197.67]R.D	YOR151C	1	RPB2	TAYHSKR	934	//9	7//32	1.64925	1.41667	R.GNLM[147.04]GK[1268.71]R.V	YDL140C	1	RPB1	GNLMGKR	343	643146	625006	701868	617379	1.13685	0.185043	0.0668429
	44	RPB1:343---RPB2:987	4.6175	-0.506862	0.506862
						0	0.331379	JL102921_110821_RPB4_C2_50B.09196.09196.5	N	4.6175	0.186389		//14	13//75	3.57025	1.36364	R.HGQK[1197.67]GTIGITYR.R	YOR151C	1	RPB2	HGQKGTIGITYR	987	//9	5//36	1.04725	0.833333	R.GNLM[147.04]GK[1736.98]R.V	YDL140C	1	RPB1	GNLMGKR	343	974163	1.46017e+06	1.05687e+06	1.50176e+06	0.703752	-0.506862	-0.625062
	45	RPB1:2---RPB2:865	7.6115	0.183912	-0.183912
						0	5.72788	JL102921_110821_RPB4_C2_70B.12659.12659.5	N	7.6115	0.235972		//16	13//119	3.5265	0.966667	K.K[1611.9]YGM[147.04]SITETFEKPQR.T	YOR151C	1	RPB2	KYGMSITETFEKPQR	865	//	9//44	4.085	0.7	M.V[2208.15]GQQYSSAPLR.T	YDL140C	1	RPB1	VGQQYSSAPLR	2	855666	832109	933785	822023	1.13596	0.183912	0.0657124
	46	RPB1:2---RPB2:606	4.59075	0.0802122	-0.0802122
						-2	3.88201	JL102921_110821_RPB4_C2_C18.12191.12191.4	P	4.59075	0.164575	0.0541	//13	13//66	3.30025	1.45833	R.K[1611.88]GDINPEVSM[147.04]IR.D	YOR151C	1	RPB2	KGDINPEVSMIR	606	//12	8//56	1.2905	1.13636	M.V[1751.93]GQQYSSAPLR.T	YDL140C	1	RPB1	VGQQYSSAPLR	2	397452	412032	433428	409987	1.05717	0.0802122	-0.0379878
	47	RPB1:2---RPB2:775	6.50275	0.180815	-0.180815
						-1	-1.22585	JL102921_110821_RPB4_C2_C18.15567.15567.5	P	6.50275	0.195243	0.688	//16	21//172	6.46125	1.20455	R.NTYQSAM[147.04]GK[1611.88]QAM[147.04]GVFLTNYNVR.M	YOR151C	1	RPB2	NTYQSAMGKQAMGVFLTNYNVR	775	1//12	2//65	0.0415	0.0909091	M.V[2902.42]GQQYSSAPLR.T	YDL140C	1	RPB1	VGQQYSSAPLR	2	649490	632814	708772	625282	1.13352	0.180815	0.0626148
	48	RPB1:687---RPB2:1057	4.254	-0.437927	0.437927
						-1	1.04737	JL102921_110821_RPB4_C2_30B.26248.26248.5	P	4.254	0.095974	0.305	//16	19//213	3.7125	0.740741	K.VAALSGNEGDASPFTDITVEGISK[1638.93]LLR.E	YOR151C	1	RPB2	VAALSGNEGDASPFTDITVEGISKLLR	1057	1//13	7//60	0.5415	0.409091	R.EITETIAEAK[3166.7]K.K	YDL140C	1	RPB1	EITETIAEAKK	687	104125	149386	113047	153139	0.738194	-0.437927	-0.556127
	49	RPB1:687---RPB2:987	5.8275	0.0885508	-0.0885508
						-2	3.44602	JL102921_110821_RPB4_C2_100B.11929.11929.5	N	5.8275	0.193882		//14	7//70	1.16775	0.772727	R.HGQK[1638.92]GTIGITYR.R	YOR151C	1	RPB2	HGQKGTIGITYR	987	//13	14//62	4.65975	2.05	R.EITETIAEAK[1736.97]K.K	YDL140C	1	RPB1	EITETIAEAKK	687	589950	635934	643054	635419	1.01202	0.0172322	-0.100968
						0	2.6088	JL102921_110821_RPB4_C2_100B.11916.11916.4	NP	5.39075	0.163146	0.0982	//14	10//57	0.9065	0.708333	R.HGQK[1638.93]GTIGITYR.R	YOR151C	1	RPB2	HGQKGTIGITYR	987	//13	15//51	4.48425	1.90909	R.EITETIAEAK[1736.98]K.K	YDL140C	1	RPB1	EITETIAEAKK	687	456618	450663	498225	445965	1.11719	0.159869	0.0416695
	50	RPB1:332---RPB2:865	10.2895	-0.213342	0.213342
						0	2.71687	JL102921_110821_RPB4_C2_100B.08599.08599.5	P	10.2895	0.461806	0.415	//16	22//119	10.2645	2.4	K.K[952.55]YGM[147.04]SITETFEKPQR.T	YOR151C	1	RPB2	KYGMSITETFEKPQR	865	//5	1//24	0.025	0.1	K.GK[2237.16]EGR.I	YDL140C	1	RPB1	GKEGR	332	367574	457617	399914	463649	0.862537	-0.213342	-0.331542
	51	RPB1:332---RPB2:507	4.06475	0.996565	-0.996565
						0	0.793382	JL102921_110821_RPB4_C2_70B.04435.04435.4	N	4.06475	0.181535		//10	11//38	2.529	1.92857	R.DGK[1193.73]LAKPR.Q	YOR151C	1	RPB2	DGKLAKPR	507	//9	7//32	1.53575	1.16667	R.LKGK[1290.79]EGR.I	YDL140C	1	RPB1	LKGKEGR	332	324475	172688	355836	154080	2.30942	1.20753	1.08933
						0	0.793382	JL102921_110821_RPB4_C2_70B.04429.04429.4	N	3.53825	0.176648		//10	9//38	2.204	1.78571	R.DGK[1193.73]LAKPR.Q	YOR151C	1	RPB2	DGKLAKPR	507	//9	6//32	1.33425	1.08333	R.LKGK[1290.79]EGR.I	YDL140C	1	RPB1	LKGKEGR	332	214436	167586	234511	160821	1.45821	0.544201	0.426001
						0	1.41965	JL102921_110821_RPB4_C2_50B.05728.05728.4	N	2.284	0.20362		//10	7//38	1.187	1.28571	R.DGK[1193.74]LAKPR.Q	YOR151C	1	RPB2	DGKLAKPR	507	//9	4//32	1.097	0.666667	R.LKGK[1290.79]EGR.I	YDL140C	1	RPB1	LKGKEGR	332	29531.5	15452.8	32388.9	13731.9	2.35866	1.23797	1.11977
	52	RPB1:332---RPB2:606	5.307	-0.172136	0.172136
						0	1.48872	JL102921_110821_RPB4_C2_70B.06812.06812.5	N	5.307	0.1791		//13	18//90	3.631	1.5	R.RK[1193.73]GDINPEVSM[147.04]IR.D	YOR151C	1	RPB2	RKGDINPEVSMIR	606	//9	6//34	1.676	1.08333	R.LKGK[1937.06]EGR.I	YDL140C	1	RPB1	LKGKEGR	332	323785	416783	352107	423512	0.831397	-0.26639	-0.38459
						0	2.3118	JL102921_110821_RPB4_C2_50B.08586.08586.5	N	4.5435	0.158379		//13	14//90	3.23625	1.5	R.RK[1193.73]GDINPEVSM[147.04]IR.D	YOR151C	1	RPB2	RKGDINPEVSMIR	606	//9	6//34	1.30725	1.08333	R.LKGK[1937.05]EGR.I	YDL140C	1	RPB1	LKGKEGR	332	625376	715243	681169	718952	0.947447	-0.0778825	-0.196082
	53	RPB1:332---RPB2:886	12.1873	0.970446	-0.970446
						0	-3.88033	JL102921_110821_RPB4_C2_100B.08911.08911.5	P	12.1873	0.436545	0.385	//18	33//166	11.7135	2.725	R.M[147.04]K[1193.73]HGTYDKLDDDGLIAPGVR.V	YOR151C	1	RPB2	MKHGTYDKLDDDGLIAPGVR	886	//9	4//34	0.47375	0.642857	R.LKGK[2623.35]EGR.I	YDL140C	1	RPB1	LKGKEGR	332	304806	208242	333706	195525	1.70672	0.771228	0.653028
						0	1.50327	JL102921_110821_RPB4_C2_70B.03240.03240.5	N	3.1745	0.154854		//8	6//47	1.955	1.42857	R.M[147.04]K[1193.74]HGTYDK.L	YOR151C	1	RPB2	MKHGTYDK	886	//9	5//39	1.2195	0.75	R.LKGK[1401.72]EGR.I	YDL140C	1	RPB1	LKGKEGR	332	133989	72835.7	146920	65309.6	2.24959	1.16966	1.05146
	54	RPB1:332---RPB2:934	4.1205	1.07172	-1.07172
						0	1.11034	JL102921_110821_RPB4_C2_100B.03374.03374.4	N	4.1205	0.185734		//9	7//33	2.0895	1.41667	R.TAYHSK[1193.73]R.D	YOR151C	1	RPB2	TAYHSKR	934	//9	9//32	2.031	1.66667	R.LKGK[1268.71]EGR.I	YDL140C	1	RPB1	LKGKEGR	332	1.00709e+06	578536	1.10391e+06	525185	2.10194	1.07172	0.953522
	55	RPB1:332---RPB2:393	3.7175	0.160202	-0.160202
						0	-1.41572	JL102921_110821_RPB4_C2_100B.03489.03489.5	P	3.7175	0.148673	0.00344	//13	16//85	3.09575	1.375	R.K[952.55]DQDDRDHFGKK.R	YOR151C	1	RPB2	KDQDDRDHFGKK	393	1//5	4//25	0.62175	0.9	K.GK[1894.97]EGR.I	YDL140C	1	RPB1	GKEGR	332	287333	283527	313515	280565	1.11744	0.160202	0.042002
	56	RPB1:332---RPB2:987	6.4315	-0.248561	0.248561
						0	2.32708	JL102921_110821_RPB4_C2_30B.06747.06747.4	P	6.4315	0.24231	0.712	//14	22//66	6.324	2.83333	R.HGQK[952.55]GTIGITYR.R	YOR151C	1	RPB2	HGQKGTIGITYR	987	1//5	2//22	0.1075	0.2	K.GK[1736.98]EGR.I	YDL140C	1	RPB1	GKEGR	332	3.30213e+06	4.59814e+06	3.58674e+06	4.70273e+06	0.762693	-0.390825	-0.509025
						0	0.70364	JL102921_110821_RPB4_C2_100B.06426.06426.5	N	6.1195	0.23827		//14	14//75	4.11775	1.72727	R.HGQK[1193.73]GTIGITYR.R	YOR151C	1	RPB2	HGQKGTIGITYR	987	//9	8//34	2.00175	1.25	R.LKGK[1736.98]EGR.I	YDL140C	1	RPB1	LKGKEGR	332	428108	522294	465904	528214	0.882037	-0.181089	-0.299289
						0	0.0666231	JL102921_110821_RPB4_C2_70B.06333.06333.5	N	4.67375	0.202964		//14	12//75	2.90025	1.54545	R.HGQK[1193.73]GTIGITYR.R	YOR151C	1	RPB2	HGQKGTIGITYR	987	//9	7//34	1.7735	1.16667	R.LKGK[1736.98]EGR.I	YDL140C	1	RPB1	LKGKEGR	332	534991	649702	582260	656790	0.886524	-0.173768	-0.291968
	57	RPB1:332---RPB2:655	3.409	-0.220929	0.220929
						0	1.62976	JL102921_110821_RPB4_C2_100B.03178.03178.4	P	3.409	0.135622	0.000109	//9	6//32	1.637	0.928571	R.LKGK[1059.66]EGR.I	YDL140C	1	RPB1	LKGKEGR	332	//7	6//30	1.772	1.08333	R.K[1193.73]GHIAK.L	YOR151C	1	RPB2	KGHIAK	655	148445	185693	161495	188220	0.858012	-0.220929	-0.339129
	58	RPB1:332---RPB2:1102	4.37325	1.61693	-1.61693
						0	0.322439	JL102921_110821_RPB4_C2_100B.04631.04631.5	P	4.37325	0.145979	0.00268	//12	19//66	3.831	2.4	R.HM[147.04]VDDK[952.55]IHAR.A	YOR151C	1	RPB2	HMVDDKIHAR	1102	1//5	4//27	0.54225	0.6	K.GK[1643.86]EGR.I	YDL140C	1	RPB1	GKEGR	332	1.40876e+06	671609	1.54586e+06	582733	2.65278	1.4075	1.2893
						0	0.738499	JL102921_110821_RPB4_C2_D.05752.05752.5	N	3.8965	0.168596		//12	13//61	2.34325	1.83333	R.HMVDDK[1193.73]IHAR.A	YOR151C	1	RPB2	HMVDDKIHAR	1102	//9	6//36	1.55325	1.08333	R.LKGK[1627.87]EGR.I	YDL140C	1	RPB1	LKGKEGR	332	143982	55083.9	158160	44597.3	3.54639	1.82635	1.70815
	59	RPB1:1003---RPB2:1102	11.1542	-0.252044	0.252044
						0	0.0281341	JL102921_110821_RPB4_C2_50B.10438.10438.4	N	11.1542	0.365174		1//11	21//54	7.16275	3.15	R.GK[1627.87]NEIIQNAQR.D	YDL140C	1	RPB1	GKNEIIQNAQR	1003	//12	13//46	3.9915	2.22222	R.HMVDDK[1676.94]IHAR.A	YOR151C	1	RPB2	HMVDDKIHAR	1102	572956	663537	623972	667789	0.934386	-0.0979101	-0.21611
						0	3.41769	JL102921_110821_RPB4_C2_30B.07198.07198.4	NP	10.8038	0.31677	0.000554	//11	20//54	7.28425	2.95455	R.GK[1643.86]NEIIQNAQR.D	YDL140C	1	RPB1	GKNEIIQNAQR	1003	//12	12//47	3.5195	1.8	R.HM[147.04]VDDK[1676.94]IHAR.A	YOR151C	1	RPB2	HMVDDKIHAR	1102	204434	300913	221857	309069	0.717821	-0.478304	-0.596504
						-1	5.02956	JL102921_110821_RPB4_C2_30B.07260.07260.4	N	10.3852	0.328128		//11	21//54	7.53075	3.3	R.GK[1643.88]NEIIQNAQR.D	YDL140C	1	RPB1	GKNEIIQNAQR	1003	//12	10//47	2.8545	1.38889	R.HM[147.04]VDDK[1676.95]IHAR.A	YOR151C	1	RPB2	HMVDDKIHAR	1102	207719	286686	225653	293000	0.770146	-0.376796	-0.494996
						0	2.3848	JL102921_110821_RPB4_C2_50B.09241.09241.4	N	9.98675	0.34512		//11	20//54	7.02225	3.25	R.GK[1643.87]NEIIQNAQR.D	YDL140C	1	RPB1	GKNEIIQNAQR	1003	//12	13//47	2.9645	1.83333	R.HM[147.04]VDDK[1676.95]IHAR.A	YOR151C	1	RPB2	HMVDDKIHAR	1102	328118	339878	357821	338162	1.05814	0.0815244	-0.0366756
						-1	0.410955	JL102921_110821_RPB4_C2_30B.07243.07243.5	P	8.87275	0.305199	0.013	1//11	17//66	8.0995	2.27273	R.GK[1643.86]NEIIQNAQR.D	YDL140C	1	RPB1	GKNEIIQNAQR	1003	//12	5//58	0.77325	0.65	R.HM[147.04]VDDK[1676.94]IHAR.A	YOR151C	1	RPB2	HMVDDKIHAR	1102	509724	655262	554320	665767	0.832604	-0.264297	-0.382497
						0	0.309841	JL102921_110821_RPB4_C2_50B.10432.10432.5	N	8.74225	0.329915		1//11	20//66	7.69325	2.65	R.GK[1627.87]NEIIQNAQR.D	YDL140C	1	RPB1	GKNEIIQNAQR	1003	//12	6//56	1.049	0.888889	R.HMVDDK[1676.94]IHAR.A	YOR151C	1	RPB2	HMVDDKIHAR	1102	669265	904881	727278	923280	0.787711	-0.344262	-0.462462
						0	5.64796	JL102921_110821_RPB4_C2_30B.07208.07208.5	P	8.47725	0.287116	0.279	1//11	20//66	7.82375	2.63636	R.GK[1643.86]NEIIQNAQR.D	YDL140C	1	RPB1	GKNEIIQNAQR	1003	//12	5//58	0.6535	0.6	R.HM[147.04]VDDK[1676.94]IHAR.A	YOR151C	1	RPB2	HMVDDKIHAR	1102	558500	723354	607298	735421	0.825783	-0.276166	-0.394366
						-1	1.83597	JL102921_110821_RPB4_C2_30B.07217.07217.6	N	4.69925	0.204395		//11	10//54	3.57875	1.45	R.GK[1643.86]NEIIQNAQR.D	YDL140C	1	RPB1	GKNEIIQNAQR	1003	//12	6//47	1.1205	0.777778	R.HM[147.04]VDDK[1676.94]IHAR.A	YOR151C	1	RPB2	HMVDDKIHAR	1102	608549	780261	661816	792590	0.835004	-0.260145	-0.378345
	60	RPB1:1003---RPB2:934	7.05	-0.145076	0.145076
						0	0.675211	JL102921_110821_RPB4_C2_30B.05754.05754.4	P	7.05	0.26892	0.703	//11	15//57	7.03275	1.90909	R.GK[1268.71]NEIIQNAQR.D	YDL140C	1	RPB1	GKNEIIQNAQR	1003	//9	1//30	0.01725	0.0714286	R.TAYHSK[1676.94]R.D	YOR151C	1	RPB2	TAYHSKR	934	353991	422231	385362	426129	0.904332	-0.145076	-0.263276
	61	RPB1:1003---RPB2:775	6.427	0.123022	-0.123022
						0	4.48376	JL102921_110821_RPB4_C2_70B.13609.13609.5	N	6.427	0.191831		//16	15//172	3.803	0.880952	R.NTYQSAM[147.04]GK[1676.96]QAM[147.04]GVFLTNYNVR.M	YOR151C	1	RPB2	NTYQSAMGKQAMGVFLTNYNVR	775	1//11	8//63	2.624	1.1	R.GK[2931.46]NEIIQNAQR.D	YDL140C	1	RPB1	GKNEIIQNAQR	1003	430314	434456	469406	431037	1.08901	0.123022	0.00482185
	62	RPB1:1003---RPB2:622	2.3835	0.0115981	-0.0115981
						0	2.75869	JL102921_110821_RPB4_C2_C18.06623.06623.4	P	2.3835	0.109095	0.519	//11	10//58	2.28375	1.04545	R.GK[1052.63]NEIIQNAQR.D	YDL140C	1	RPB1	GKNEIIQNAQR	1003	//5	1//21	0.09975	0.1	R.EK[1676.94]ELK.I	YOR151C	1	RPB2	EKELK	622	583876	631592	636406	631310	1.00807	0.0115981	-0.106602
	63	RPB1:1003---RPB2:865	11.5267	-0.112232	0.112232
						-1	3.20687	JL102921_110821_RPB4_C2_70B.10792.10792.5	N	11.5267	0.418219		//16	20//118	5.251	1.73333	K.K[1676.95]YGM[147.04]SITETFEKPQR.T	YOR151C	1	RPB2	KYGMSITETFEKPQR	865	1//11	16//63	6.27575	2.2	R.GK[2237.17]NEIIQNAQR.D	YDL140C	1	RPB1	GKNEIIQNAQR	1003	384504	449296	418691	452563	0.925156	-0.112232	-0.230432
	64	RPB1:1003---RPB2:507	3.71075	-0.105797	0.105797
						-1	5.13428	JL102921_110821_RPB4_C2_C18.06436.06436.4	P	3.71075	0.127504	0.505	1//11	14//57	3.142	1.86364	R.GK[1290.79]NEIIQNAQR.D	YDL140C	1	RPB1	GKNEIIQNAQR	1003	//10	4//34	0.56875	0.375	R.DGK[1676.94]LAKPR.Q	YOR151C	1	RPB2	DGKLAKPR	507	364972	424761	397444	427685	0.929292	-0.105797	-0.223997
	65	RPB1:728---RPB2:987	6.80825	-0.393701	0.393701
						0	0.369779	JL102921_110821_RPB4_C2_50B.08440.08440.5	N	6.80825	0.25647		//14	20//79	5.8695	2.40909	R.HGQK[952.55]GTIGITYR.R	YOR151C	1	RPB2	HGQKGTIGITYR	987	//5	4//27	0.93875	1.125	R.DK[1736.98]AGR.L	YDL140C	1	RPB1	DKAGR	728	1.14634e+06	1.64564e+06	1.24454e+06	1.68706e+06	0.737698	-0.438897	-0.557097
						0	4.14042	JL102921_110821_RPB4_C2_C18.06136.06136.4	P	6.35	0.248863	0.535	//14	19//66	6.0085	2.5	R.HGQK[952.55]GTIGITYR.R	YOR151C	1	RPB2	HGQKGTIGITYR	987	1//5	4//22	0.3415	0.6	R.DK[1736.98]AGR.L	YDL140C	1	RPB1	DKAGR	728	1.53281e+06	2.07274e+06	1.66567e+06	2.11492e+06	0.787584	-0.344494	-0.462694
						0	3.08592	JL102921_110821_RPB4_C2_C18.06139.06139.5	NP	6.3345	0.231986	0.547	//14	19//79	5.41275	2.29167	R.HGQK[952.55]GTIGITYR.R	YOR151C	1	RPB2	HGQKGTIGITYR	987	1//5	5//27	0.92175	1	R.DK[1736.98]AGR.L	YDL140C	1	RPB1	DKAGR	728	938311	1.39734e+06	1.01808e+06	1.43646e+06	0.708745	-0.496661	-0.614861
						0	2.09425	JL102921_110821_RPB4_C2_30B.06756.06756.5	P	5.21575	0.169772	0.414	//14	17//79	4.7825	1.95833	R.HGQK[952.55]GTIGITYR.R	YOR151C	1	RPB2	HGQKGTIGITYR	987	//5	3//27	0.43325	0.5	R.DK[1736.98]AGR.L	YDL140C	1	RPB1	DKAGR	728	3.53561e+06	5.08311e+06	3.83841e+06	5.21165e+06	0.736506	-0.441232	-0.559432
						0	3.40992	JL102921_110821_RPB4_C2_30B.06760.06760.3	P	3.24075	0.124212	0.65	//14	14//53	2.63025	1.54167	R.HGQK[952.55]GTIGITYR.R	YOR151C	1	RPB2	HGQKGTIGITYR	987	1//5	5//17	0.6105	0.9	R.DK[1736.98]AGR.L	YDL140C	1	RPB1	DKAGR	728	2.10775e+06	2933471	2.28943e+06	3.00008e+06	0.763125	-0.390008	-0.508208
						1	-0.0328579	JL102921_110821_RPB4_C2_30B.10813.10813.5	P	1.82475	0.0606824	0.137	//18	13//118	1.74125	0.65625	K.FASRHGQK[952.55]GTIGITYR.R	YOR151C	1	RPB2	FASRHGQKGTIGITYR	987	1//5	2//24	0.0835	0.2	R.DK[2198.22]AGR.L	YDL140C	1	RPB1	DKAGR	728	76619.6	97669.9	83333.2	99163.4	0.840363	-0.250916	-0.369116
	66	RPB1:728---RPB2:1102	4.6075	0.0498925	-0.0498925
						0	0.243283	JL102921_110821_RPB4_C2_70B.04944.04944.5	N	4.6075	0.166805		//12	16//66	3.697	2.11111	R.HM[147.04]VDDK[952.55]IHAR.A	YOR151C	1	RPB2	HMVDDKIHAR	1102	1//5	5//27	0.9105	1.25	R.DK[1643.86]AGR.L	YDL140C	1	RPB1	DKAGR	728	760653	954520	827487	967782	0.855035	-0.225945	-0.344145
						0	0.423019	JL102921_110821_RPB4_C2_100B.05089.05089.5	N	4.58075	0.193702		//12	16//66	3.6375	2.11111	R.HM[147.04]VDDK[952.55]IHAR.A	YOR151C	1	RPB2	HMVDDKIHAR	1102	1//5	5//27	0.94325	1.25	R.DK[1643.87]AGR.L	YDL140C	1	RPB1	DKAGR	728	552140	535373	602567	528703	1.13971	0.188666	0.0704655
						0	-0.491931	JL102921_110821_RPB4_C2_100B.04928.04928.5	P	4.18	0.153243	0.536	//12	16//66	3.344	1.9	R.HM[147.04]VDDK[952.55]IHAR.A	YOR151C	1	RPB2	HMVDDKIHAR	1102	1//5	5//27	0.836	1	R.DK[1643.86]AGR.L	YDL140C	1	RPB1	DKAGR	728	784503	761479	856142	752084	1.13836	0.186957	0.0687571
	67	RPB1:728---RPB2:1057	11.2655	-0.166418	0.166418
						0	3.33793	JL102921_110821_RPB4_C2_30B.26111.26111.5	P	11.2655	0.33406	0.669	//16	33//220	11.2157	1.87037	K.VAALSGNEGDASPFTDITVEGISK[952.55]LLR.E	YOR151C	1	RPB2	VAALSGNEGDASPFTDITVEGISKLLR	1057	//5	1//24	0.04975	0.1	R.DK[3166.7]AGR.L	YDL140C	1	RPB1	DKAGR	728	93779.9	113364	102072	114553	0.891052	-0.166418	-0.284618
	68	RPB1:728---RPB2:403	3.4715	-0.496756	0.496756
						0	0.556435	JL102921_110821_RPB4_C2_50B.05940.05940.5	N	3.4715	0.194411		//13	14//70	2.33425	1.3	K.DQDDRDHFGK[952.55]K.R	YOR151C	1	RPB2	DQDDRDHFGKK	403	//5	5//26	1.13725	1.25	R.DK[1766.88]AGR.L	YDL140C	1	RPB1	DKAGR	728	48971.5	72933.3	53134.8	74975.1	0.708699	-0.496756	-0.614956
	69	RPB1:728---RPB2:865	11.5318	-0.332471	0.332471
						0	2.94682	JL102921_110821_RPB4_C2_100B.08575.08575.5	P	11.5318	0.505258	0.00129	//16	25//119	11.1572	2.7	K.K[952.55]YGM[147.04]SITETFEKPQR.T	YOR151C	1	RPB2	KYGMSITETFEKPQR	865	//5	3//24	0.3745	0.8	R.DK[2237.16]AGR.L	YDL140C	1	RPB1	DKAGR	728	377714	506897	410501	516889	0.794175	-0.332471	-0.450671
	70	RPB1:728---RPB2:606	3.95275	-0.411822	0.411822
						0	5.67136	JL102921_110821_RPB4_C2_30B.07216.07216.5	N	3.95275	0.170194		//13	11//88	3.00375	1.125	R.RK[952.57]GDINPEVSM[147.04]IR.D	YOR151C	1	RPB2	RKGDINPEVSMIR	606	1//5	4//24	0.949	1.125	R.DK[1937.07]AGR.L	YDL140C	1	RPB1	DKAGR	728	809407	1.02328e+06	880432	1.03818e+06	0.848053	-0.237774	-0.355974
						0	0.649763	JL102921_110821_RPB4_C2_30B.07244.07244.4	P	2.53925	0.0879531	0.656	//13	13//73	1.7785	0.730769	R.RK[952.55]GDINPEVSM[147.04]IR.D	YOR151C	1	RPB2	RKGDINPEVSMIR	606	1//5	4//19	0.76075	0.9	R.DK[1937.06]AGR.L	YDL140C	1	RPB1	DKAGR	728	435935	687149	472535	709248	0.666247	-0.585871	-0.704071
	71	RPB1:728---RPB2:886	6.333	-0.335677	0.335677
						-1	12.5369	JL102921_110821_RPB4_C2_30B.09441.09441.5	P	6.333	0.279782	0.0661	//18	26//166	6.13875	1.65	R.M[147.04]K[952.55]HGTYDKLDDDGLIAPGVR.V	YOR151C	1	RPB2	MKHGTYDKLDDDGLIAPGVR	886	1//5	3//24	0.19425	0.3	R.DK[2623.35]AGR.L	YDL140C	1	RPB1	DKAGR	728	77410.2	104096	84127.2	106166	0.792412	-0.335677	-0.453877
	72	RPB1:728---RPB2:374	7.432	-0.378305	0.378305
						0	1.65527	JL102921_110821_RPB4_C2_100B.14633.14633.4	P	7.432	0.32418	6.75e-07	//12	16//63	7.3295	2.27273	R.K[952.55]AFFLGYM[147.04]INR.L	YOR151C	1	RPB2	KAFFLGYMINR	374	//5	2//21	0.1025	0.2	R.DK[1781.97]AGR.L	YDL140C	1	RPB1	DKAGR	728	324960	448926	353012	458849	0.769341	-0.378305	-0.496505
	73	RPB1:1112---RPB2:507	19.6925	0.649896	-0.649896
						0	1.10985	JL102921_110821_RPB4_C2_50B.14780.14780.5	NP	19.6925	0.542187	0.131	//17	43//186	18.2007	2.8913	K.NM[147.04]K[1290.79]TPSLTVYLEPGHAADQEQAK.L	YDL140C	1	RPB1	NMKTPSLTVYLEPGHAADQEQAK	1112	//10	6//40	1.49175	1.0625	R.DGK[2950.49]LAKPR.Q	YOR151C	1	RPB2	DGKLAKPR	507	1.16475e+06	681316	1.27658e+06	620876	2.05609	1.03991	0.921706
						0	-0.046604	JL102921_110821_RPB4_C2_70B.11923.11923.6	NP	18.7362	0.596013	0.0623	//17	42//186	17.2937	2.93478	K.NM[147.04]K[1290.79]TPSLTVYLEPGHAADQEQAK.L	YDL140C	1	RPB1	NMKTPSLTVYLEPGHAADQEQAK	1112	//10	5//40	1.4425	1	R.DGK[2950.49]LAKPR.Q	YOR151C	1	RPB2	DGKLAKPR	507	936686	660703	1.02524e+06	623770	1.64363	0.716881	0.598681
						0	0.142778	JL102921_110821_RPB4_C2_70B.11926.11926.5	N	17.5837	0.497961		//17	42//186	16.6393	3	K.NM[147.04]K[1290.79]TPSLTVYLEPGHAADQEQAK.L	YDL140C	1	RPB1	NMKTPSLTVYLEPGHAADQEQAK	1112	//10	4//40	0.9445	0.857143	R.DGK[2950.49]LAKPR.Q	YOR151C	1	RPB2	DGKLAKPR	507	681157	407063	746449	372610	2.0033	1.00238	0.884177
						0	1.10985	JL102921_110821_RPB4_C2_50B.14750.14750.5	P	16.7368	0.464143	0.221	1//17	40//186	16.053	2.54348	K.NM[147.04]K[1290.79]TPSLTVYLEPGHAADQEQAK.L	YDL140C	1	RPB1	NMKTPSLTVYLEPGHAADQEQAK	1112	//10	5//40	0.68375	0.5625	R.DGK[2950.49]LAKPR.Q	YOR151C	1	RPB2	DGKLAKPR	507	1.10984e+06	768487	1.21495e+06	723241	1.67986	0.748343	0.630143
						-1	3.04969	JL102921_110821_RPB4_C2_100B.12034.12034.6	NP	13.9853	0.451203	8.02e-11	//17	37//186	12.5333	2.21739	K.NM[147.04]K[1290.79]TPSLTVYLEPGHAADQEQAK.L	YDL140C	1	RPB1	NMKTPSLTVYLEPGHAADQEQAK	1112	//10	5//40	1.452	1	R.DGK[2950.49]LAKPR.Q	YOR151C	1	RPB2	DGKLAKPR	507	597352	529994	652507	517683	1.26044	0.333924	0.215724
						-1	0.480424	JL102921_110821_RPB4_C2_D.11147.11147.6	NP	13.2577	0.472058	0.521	1//17	38//186	11.9473	2.36957	K.NM[147.04]K[1290.79]TPSLTVYLEPGHAADQEQAK.L	YDL140C	1	RPB1	NMKTPSLTVYLEPGHAADQEQAK	1112	//10	5//40	1.3105	1	R.DGK[2950.49]LAKPR.Q	YOR151C	1	RPB2	DGKLAKPR	507	1.30969e+06	988235	1.43273e+06	943262	1.51891	0.603033	0.484833
						0	-5.48158	JL102921_110821_RPB4_C2_50B.14739.14739.6	NP	13.1608	0.441814	0.708	//17	35//186	12.0648	2.1087	K.NM[147.04]K[1290.79]TPSLTVYLEPGHAADQEQAK.L	YDL140C	1	RPB1	NMKTPSLTVYLEPGHAADQEQAK	1112	//10	5//40	1.096	1	R.DGK[2950.49]LAKPR.Q	YOR151C	1	RPB2	DGKLAKPR	507	1.57483e+06	1.192e+06	1.72274e+06	1.1383e+06	1.51343	0.597818	0.479618
						-1	0.909434	JL102921_110821_RPB4_C2_70B.11899.11899.6	N	12.8223	0.442452		1//17	32//140	11.56	2.02273	K.NM[147.04]K[1290.79]TPSLTVYLEPGHAADQEQAK.L	YDL140C	1	RPB1	NMKTPSLTVYLEPGHAADQEQAK	1112	1//10	6//32	1.26225	1.21429	R.DGK[2950.5]LAKPR.Q	YOR151C	1	RPB2	DGKLAKPR	507	825096	623087	902604	594807	1.51747	0.601671	0.483471
						0	-0.046604	JL102921_110821_RPB4_C2_100B.11975.11975.6	NP	10.1907	0.370788	3.13e-09	//17	34//186	9.17075	1.93478	K.NM[147.04]K[1290.79]TPSLTVYLEPGHAADQEQAK.L	YDL140C	1	RPB1	NMKTPSLTVYLEPGHAADQEQAK	1112	//10	4//40	1.02	0.75	R.DGK[2950.49]LAKPR.Q	YOR151C	1	RPB2	DGKLAKPR	507	598815	585373	653448	578629	1.1293	0.175434	0.0572342
						-2	7.3405	JL102921_110821_RPB4_C2_C18.12310.12310.6	P	5.64125	0.180789	0.00394	//17	25//186	4.96225	1.32609	K.NMK[1290.79]TPSLTVYLEPGHAADQEQAK.L	YDL140C	1	RPB1	NMKTPSLTVYLEPGHAADQEQAK	1112	//10	5//40	0.679	0.5625	R.DGK[2934.5]LAKPR.Q	YOR151C	1	RPB2	DGKLAKPR	507	963479	694730	1.05439e+06	658306	1.60167	0.679573	0.561373
	74	RPB1:461---RPB2:987	6.2305	-0.506568	0.506568
						0	4.3647	JL102921_110821_RPB4_C2_50B.16267.16267.6	N	6.2305	0.234754		//14	11//58	3.2865	1.5	R.HGQK[1615.94]GTIGITYR.R	YOR151C	1	RPB2	HGQKGTIGITYR	987	//10	8//46	2.944	1.33333	R.VK[1736.96]VIPYSTFR.L	YDL140C	1	RPB1	VKVIPYSTFR	461	583861	896718	633167	923874	0.685339	-0.54511	-0.66331
						-1	-1.40068	JL102921_110821_RPB4_C2_50B.16241.16241.4	NP	6.22975	0.196021	0.518	//14	15//58	2.50875	1.625	R.HGQK[1615.95]GTIGITYR.R	YOR151C	1	RPB2	HGQKGTIGITYR	987	//10	15//46	3.721	1.95	R.VK[1736.98]VIPYSTFR.L	YDL140C	1	RPB1	VKVIPYSTFR	461	1.67782e+06	2.76609e+06	1.81721e+06	2.86371e+06	0.634564	-0.656163	-0.774363
						0	4.3647	JL102921_110821_RPB4_C2_50B.16276.16276.6	N	5.4705	0.199362		//14	11//58	3.074	1.5	R.HGQK[1615.94]GTIGITYR.R	YOR151C	1	RPB2	HGQKGTIGITYR	987	//10	8//46	2.3965	1.33333	R.VK[1736.96]VIPYSTFR.L	YDL140C	1	RPB1	VKVIPYSTFR	461	521876	766148	566377	786761	0.719884	-0.474163	-0.592363
						0	6.41321	JL102921_110821_RPB4_C2_70B.13294.13294.4	N	5.22825	0.173428		//14	14//58	2.0585	1.45455	R.HGQK[1615.94]GTIGITYR.R	YOR151C	1	RPB2	HGQKGTIGITYR	987	//10	9//46	3.16975	1.05556	R.VK[1736.96]VIPYSTFR.L	YDL140C	1	RPB1	VKVIPYSTFR	461	722234	980566	784790	1.00084e+06	0.78413	-0.350836	-0.469036
	75	RPB1:461---RPB2:1102	7.357	-0.412296	0.412296
						0	0.0160489	JL102921_110821_RPB4_C2_70B.10956.10956.4	N	7.357	0.242609		//12	13//47	2.809	1.88889	R.HM[147.04]VDDK[1615.95]IHAR.A	YOR151C	1	RPB2	HMVDDKIHAR	1102	//10	15//47	4.548	2.5	R.VK[1643.86]VIPYSTFR.L	YDL140C	1	RPB1	VKVIPYSTFR	461	503248	643593	547318	653618	0.837367	-0.256068	-0.374268
						0	1.00177	JL102921_110821_RPB4_C2_70B.10981.10981.4	N	6.11625	0.207215		1//12	12//47	2.80625	1.83333	R.HM[147.04]VDDK[1615.95]IHAR.A	YOR151C	1	RPB2	HMVDDKIHAR	1102	//10	13//47	3.31	1.83333	R.VK[1643.86]VIPYSTFR.L	YDL140C	1	RPB1	VKVIPYSTFR	461	492247	609534	535597	617271	0.867684	-0.204758	-0.322958
						0	2.11289	JL102921_110821_RPB4_C2_100B.10947.10947.4	NP	6.09875	0.211359	1.14e-06	1//12	14//47	2.87975	1.75	R.HM[147.04]VDDK[1615.95]IHAR.A	YOR151C	1	RPB2	HMVDDKIHAR	1102	//10	13//47	3.219	1.8	R.VK[1643.86]VIPYSTFR.L	YDL140C	1	RPB1	VKVIPYSTFR	461	502203	654057	546038	665282	0.820762	-0.284964	-0.403164
						0	0.320675	JL102921_110821_RPB4_C2_100B.10938.10938.4	NP	5.178	0.188346	1.39e-06	//12	9//47	2.20275	1.05	R.HM[147.04]VDDK[1615.95]IHAR.A	YOR151C	1	RPB2	HMVDDKIHAR	1102	//10	13//47	2.97525	1.65	R.VK[1643.86]VIPYSTFR.L	YDL140C	1	RPB1	VKVIPYSTFR	461	443077	594091	481544	605757	0.794946	-0.331071	-0.449271
						0	2.08492	JL102921_110821_RPB4_C2_70B.10939.10939.5	N	4.90675	0.218238		//12	7//58	0.905	0.944444	R.HM[147.04]VDDK[1615.96]IHAR.A	YOR151C	1	RPB2	HMVDDKIHAR	1102	//10	14//57	4.00175	1.94444	R.VK[1643.87]VIPYSTFR.L	YDL140C	1	RPB1	VKVIPYSTFR	461	463292	691358	502661	710817	0.70716	-0.499892	-0.618092
						0	-1.19005	JL102921_110821_RPB4_C2_100B.10945.10945.6	NP	4.6985	0.161585	5.32e-06	//12	8//58	1.334	0.9	R.HM[147.04]VDDK[1615.95]IHAR.A	YOR151C	1	RPB2	HMVDDKIHAR	1102	//10	12//57	3.3645	1.5	R.VK[1643.86]VIPYSTFR.L	YDL140C	1	RPB1	VKVIPYSTFR	461	303386	507497	328502	525907	0.624638	-0.678907	-0.797107
						0	1.63879	JL102921_110821_RPB4_C2_70B.10976.10976.6	N	4.4255	0.165895		//12	8//47	1.1705	1.11111	R.HM[147.04]VDDK[1615.95]IHAR.A	YOR151C	1	RPB2	HMVDDKIHAR	1102	//10	10//47	3.255	1.44444	R.VK[1643.86]VIPYSTFR.L	YDL140C	1	RPB1	VKVIPYSTFR	461	253869	411704	275042	425768	0.645991	-0.630414	-0.748614
	76	RPB1:461---RPB2:277	5.55275	0.340102	-0.340102
						-1	9.58607	JL102921_110821_RPB4_C2_D.24772.24772.5	N	5.55275	0.155267		//17	15//156	4.304	0.894737	R.TIKATLPYIK[1615.99]QDIPIVIIFR.A	YOR151C	1	RPB2	TIKATLPYIKQDIPIVIIFR	277	3//10	6//54	1.24875	0.722222	R.VK[2748.71]VIPYSTFR.L	YDL140C	1	RPB1	VKVIPYSTFR	461	636829	562900	695655	549557	1.26585	0.340102	0.221902
	77	RPB1:461---RPB2:886	10.0753	-0.285727	0.285727
						0	1.31415	JL102921_110821_RPB4_C2_50B.18183.18183.5	NP	10.0753	0.345581	0.104	//18	27//163	6.9215	1.575	R.M[147.04]K[1615.95]HGTYDKLDDDGLIAPGVR.V	YOR151C	1	RPB2	MKHGTYDKLDDDGLIAPGVR	886	//10	15//54	3.15375	2.05	R.VK[2623.35]VIPYSTFR.L	YDL140C	1	RPB1	VKVIPYSTFR	461	1.13954e+06	1339656	1.24076e+06	1.35018e+06	0.918959	-0.121928	-0.240128
						-1	0.280921	JL102921_110821_RPB4_C2_50B.18175.18175.5	N	9.99925	0.339666		//18	28//157	6.68825	1.57895	R.M[147.04]K[1615.95]HGTYDKLDDDGLIAPGVR.V	YOR151C	1	RPB2	MKHGTYDKLDDDGLIAPGVR	886	//10	14//54	3.311	2.11111	R.VK[2623.35]VIPYSTFR.L	YDL140C	1	RPB1	VKVIPYSTFR	461	981065	1.13613e+06	1.06842e+06	1.14341e+06	0.934419	-0.0978589	-0.216059
						-1	0.292081	JL102921_110821_RPB4_C2_50B.18188.18188.6	N	9.67	0.36803		//18	16//120	6.83	1.34211	R.M[147.04]K[1615.95]HGTYDKLDDDGLIAPGVR.V	YOR151C	1	RPB2	MKHGTYDKLDDDGLIAPGVR	886	//10	8//44	2.84	1.33333	R.VK[2623.35]VIPYSTFR.L	YDL140C	1	RPB1	VKVIPYSTFR	461	805625	1.13359e+06	874920	1.16033e+06	0.75403	-0.407307	-0.525507
						-3	10.8786	JL102921_110821_RPB4_C2_50B.18217.18217.6	N	9.5915	0.36193		//18	18//120	6.90525	1.39474	R.M[147.04]K[1615.91]HGTYDKLDDDGLIAPGVR.V	YOR151C	1	RPB2	MKHGTYDKLDDDGLIAPGVR	886	//10	10//44	2.68625	1.44444	R.VK[2623.31]VIPYSTFR.L	YDL140C	1	RPB1	VKVIPYSTFR	461	875557	1.31987e+06	949799	1.35802e+06	0.699399	-0.515812	-0.634012
	78	RPB1:419---RPB2:886	13.5515	0.974661	-0.974661
						-1	5.63975	JL102921_110821_RPB4_C2_C18.08320.08320.4	P	13.5515	0.4052	0.688	//18	36//128	13.4985	2.875	R.M[147.04]K[959.56]HGTYDKLDDDGLIAPGVR.V	YOR151C	1	RPB2	MKHGTYDKLDDDGLIAPGVR	886	//6	1//15	0.053	0.125	R.YSK[2623.35]R.A	YDL140C	1	RPB1	YSKR	419	492563	299068	539720	274641	1.96518	0.974661	0.856461
	79	RPB1:941---RPB2:606	5.068	-0.255556	0.255556
						0	0.388584	JL102921_110821_RPB4_C2_70B.09747.09747.4	N	5.068	0.195997		1//13	18//73	3.3215	1.5	R.RK[969.62]GDINPEVSM[147.04]IR.D	YOR151C	1	RPB2	RKGDINPEVSMIR	606	//5	7//19	1.7465	2.5	R.K[1937.06]FLR.E	YDL140C	2	RPB1	KFLR	941	1.8999e+06	2428963	2.06629e+06	2.46673e+06	0.837664	-0.255556	-0.373756
	80	RPB1:941---RPB2:865	12.121	-0.449316	0.449316
						-1	2.7217	JL102921_110821_RPB4_C2_100B.10964.10964.5	P	12.121	0.471754	7.68e-10	//16	25//118	11.661	2.53333	K.K[969.62]YGM[147.04]SITETFEKPQR.T	YOR151C	1	RPB2	KYGMSITETFEKPQR	865	1//5	5//23	0.46	0.875	R.K[2237.16]FLR.E	YDL140C	2	RPB1	KFLR	941	457483	694424	496216	714854	0.69415	-0.526681	-0.644881
						0	-3.01301	JL102921_110821_RPB4_C2_100B.10892.10892.5	P	10.8778	0.44457	1.97e-10	//16	26//118	10.4062	2.5	K.K[969.62]YGM[147.04]SITETFEKPQR.T	YOR151C	1	RPB2	KYGMSITETFEKPQR	865	1//5	5//23	0.4715	0.875	R.K[2237.16]FLR.E	YDL140C	2	RPB1	KFLR	941	471105	648212	511805	662328	0.772736	-0.371952	-0.490152
	81	RPB1:941---RPB2:1102	2.941	-0.326164	0.326164
						0	-3.13207	JL102921_110821_RPB4_C2_100B.07118.07118.5	P	2.941	0.123411	0.72	//12	10//66	2.18175	1.1	R.HM[147.04]VDDK[969.62]IHAR.A	YOR151C	1	RPB2	HMVDDKIHAR	1102	//5	4//26	0.75925	1.125	R.K[1643.86]FLR.E	YDL140C	2	RPB1	KFLR	941	257426	344097	279789	350764	0.797654	-0.326164	-0.444364
	82	RPB1:941---RPB2:987	6.791	-0.649473	0.649473
						0	0.741707	JL102921_110821_RPB4_C2_100B.09332.09332.5	P	6.791	0.262627	1.89e-09	1//14	21//79	6.17775	2.54167	R.HGQK[969.62]GTIGITYR.R	YOR151C	1	RPB2	HGQKGTIGITYR	987	//5	3//26	0.61325	0.625	R.K[1736.98]FLR.E	YDL140C	2	RPB1	KFLR	941	781148	1282324	846110	1.3272e+06	0.637513	-0.649473	-0.767673
	83	RPB1:49---RPB2:865	9.52075	0.0904955	-0.0904955
						0	-0.134187	JL102921_110821_RPB4_C2_70B.11297.11297.5	NP	9.52075	0.318921	0.196	//16	21//120	6.7185	1.93333	K.K[1446.84]YGM[147.04]SITETFEKPQR.T	YOR151C	1	RPB2	KYGMSITETFEKPQR	865	1//10	14//52	2.80225	1.6	R.AK[2237.16]IGGLNDPR.L	YDL140C	1	RPB1	AKIGGLNDPR	49	985297	996786	1.07478e+06	989167	1.08655	0.119757	0.00155723
						0	3.60364	JL102921_110821_RPB4_C2_70B.11324.11324.5	N	7.96875	0.278871		//16	18//120	6.248	1.73333	K.K[1446.83]YGM[147.04]SITETFEKPQR.T	YOR151C	1	RPB2	KYGMSITETFEKPQR	865	//10	11//52	1.72075	1	R.AK[2237.15]IGGLNDPR.L	YDL140C	1	RPB1	AKIGGLNDPR	49	817078	857059	890915	853892	1.04336	0.0612339	-0.0569661
	84	RPB1:49---RPB2:277	6.21275	-0.21177	0.21177
						0	1.00664	JL102921_110821_RPB4_C2_100B.26661.26661.5	P	6.21275	0.216967	6.97e-08	//19	18//129	5.3575	1.35294	K.ATLPYIK[1446.84]QDIPIVIIFR.A	YOR151C	1	RPB2	ATLPYIKQDIPIVIIFR	277	//10	6//52	0.85525	0.65	R.AK[2406.45]IGGLNDPR.L	YDL140C	1	RPB1	AKIGGLNDPR	49	52790.9	65658	57436.4	66517.6	0.863477	-0.21177	-0.32997
	85	RPB1:49---RPB2:1183	7.209	0.324017	-0.324017
						-1	7.40676	JL102921_110821_RPB4_C2_50B.18856.18856.7	N	7.209	0.219305		//9	18//158	4.98625	1.01923	K.LNHNQFEC[160.03]K[1446.87]GC[160.03]DNKIDIYQIHIPYAAK.L	YOR151C	1	RPB2	LNHNQFECKGCDNKIDIYQIHIPYAAK	1183	1//10	8//42	2.22275	1.38889	R.AK[3695.88]IGGLNDPR.L	YDL140C	1	RPB1	AKIGGLNDPR	49	1.0889e+06	971958	1.18937e+06	950122	1.25181	0.324017	0.205817
	86	RPB1:49---RPB2:934	5.054	-0.0294952	0.0294952
						0	5.98321	JL102921_110821_RPB4_C2_30B.05972.05972.4	P	5.054	0.183718	0.604	//10	15//49	5.0235	2.05	R.AK[1268.71]IGGLNDPR.L	YDL140C	1	RPB1	AKIGGLNDPR	49	//9	2//31	0.0305	0.142857	R.TAYHSK[1446.84]R.D	YOR151C	1	RPB2	TAYHSKR	934	2.47666e+06	2.7484e+06	2.69864e+06	2.75438e+06	0.979763	-0.0294952	-0.147695
	87	RPB1:49---RPB2:1102	4.4985	-0.158968	0.158968
						-3	6.18179	JL102921_110821_RPB4_C2_30B.07593.07593.5	P	4.4985	0.170585	0.173	//12	6//59	0.78325	0.7	R.HM[147.04]VDDK[1446.84]IHAR.A	YOR151C	1	RPB2	HMVDDKIHAR	1102	1//10	13//56	3.71525	1.75	R.AK[1643.86]IGGLNDPR.L	YDL140C	1	RPB1	AKIGGLNDPR	49	1.63197e+06	1.96359e+06	1.77639e+06	1.98331e+06	0.895665	-0.158968	-0.277168
	88	RPB1:372---RPB2:134	7.3165	-0.384778	0.384778
						-1	-4.46943	JL102921_110821_RPB4_C2_30B.27724.27724.4	P	7.3165	0.198075	0.722	//19	17//112	7.2045	1.26316	K.SIAK[2430.38]TLTYPEVVTPYNIDR.L	YDL140C	1	RPB1	SIAKTLTYPEVVTPYNIDR	372	//17	3//87	0.112	0.1	R.NLTYSSGLFVDVK[425.27]K[2586.41]R.T	YOR151C	1	RPB2	NLTYSSGLFVDVKKR	134	63072.8	87491.7	68513.2	89454.8	0.765897	-0.384778	-0.502978
	89	RPB1:431---RPB2:1102	5.56175	-0.113387	0.113387
						0	2.54957	JL102921_110821_RPB4_C2_100B.12486.12486.4	N	5.56175	0.169628		2//16	15//75	4.49875	1.5	R.AGDIQLQYGWK[1643.87]VER.H	YDL140C	1	RPB1	AGDIQLQYGWKVER	431	2//12	11//47	1.063	1.11111	R.HM[147.04]VDDK[2069.12]IHAR.A	YOR151C	1	RPB2	HMVDDKIHAR	1102	340400	398047	370663	400970	0.924415	-0.113387	-0.231587
3	RPB1---RPB3
	1	RPB1:49---RPB3:149	5.41825	-0.501533	0.501533
						0	3.88789	JL102921_110821_RPB4_C2_C18.06349.06349.4	P	5.41825	0.200776	0.302	1//10	17//49	5.05225	2.15	R.AK[1108.67]IGGLNDPR.L	YDL140C	1	RPB1	AKIGGLNDPR	49	1//7	5//31	0.366	0.833333	R.K[1446.84]GQELK.L	YIL021W	1	RPB3	KGQELK	149	495890	740776	538021	761685	0.706356	-0.501533	-0.619733
	2	RPB1:924---RPB3:15	7.80425	-0.137877	0.137877
						-2	7.51533	JL102921_110821_RPB4_C2_C18.32088.32088.8	P	7.80425	0.197573	0.621	//3	27//354	7.51	0.75	R.YRVDLLNTDHTLDPSLLESGSEILGDLK[3213.69]LQVLLDEEYKQLVK.D	YDL140C	1	RPB1	YRVDLLNTDHTLDPSLLESGSEILGDLKLQVLLDEEYKQLVK	924	//13	6//199	0.29425	0.12	K.IREASK[5218.81]DNVDFILSNVDLAM[147.04]ANSLR.R	YIL021W	1	RPB3	IREASKDNVDFILSNVDLAMANSLR	15	181465	215474	197558	217371	0.908856	-0.137877	-0.256077
	3	RPB1:368---RPB3:137	3.16425	-0.535864	0.535864
						-57	6.60047	JL102921_110821_RPB4_C2_C18.27488.27488.5	P	3.16425	0.0872487	0.721	//19	19//170	2.57275	0.954545	R.TVISGDPNLELDQVGVPK[2454.35]SIAK.T	YDL140C	1	RPB1	TVISGDPNLELDQVGVPKSIAK	368	//20	11//146	0.5915	0.342105	R.NIGHPIIQDK[2686.5]EGNGVLICK.L	YIL021W	1	RPB3	NIGHPIIQDKEGNGVLICK	137	380251	580577	412405	597908	0.689745	-0.535864	-0.654064
	4	RPB1:1003---RPB3:149	4.85325	-0.150445	0.150445
						0	4.27536	JL102921_110821_RPB4_C2_C18.06130.06130.4	P	4.85325	0.218281	0.11	1//11	15//58	4.53925	1.77273	R.GK[1108.67]NEIIQNAQR.D	YDL140C	1	RPB1	GKNEIIQNAQR	1003	//7	2//30	0.314	0.333333	R.K[1676.94]GQELK.L	YIL021W	1	RPB3	KGQELK	149	348361	416916	379216	420896	0.900973	-0.150445	-0.268645
	5	RPB1:567---RPB3:222	8.827	0.312199	-0.312199
						-62	7.02005	JL102921_110821_RPB4_C2_30B.35127.35127.6	P	8.827	0.386251	0.0779	//2	12//341	3.72575	0.378049	K.NCEYEDPPNEGDPFDYK[4133.2]AQADTFYMNVESVGSIPVDQVVVR.G	YIL021W	1	RPB3	NCEYEDPPNEGDPFDYKAQADTFYMNVESVGSIPVDQVVVR	222	//16	16//260	5.10125	0.71875	R.DTFIELDQVLNMLYWVPDWDGVIPTPAIIK[5043.33]PK.P	YDL140C	1	RPB1	DTFIELDQVLNMLYWVPDWDGVIPTPAIIKPK	567	11493	10332.8	12552.5	10110	1.2416	0.312199	0.193999
	6	RPB1:332---RPB3:165	4.1545	0.607949	-0.607949
						0	0.504603	JL102921_110821_RPB4_C2_100B.03357.03357.4	N	4.1545	0.214426		1//11	15//45	2.39475	2.3125	K.KGIAK[1193.73]EHAK.W	YIL021W	1	RPB3	KGIAKEHAK	165	1//9	10//32	1.75975	1.83333	R.LKGK[1387.84]EGR.I	YDL140C	1	RPB1	LKGKEGR	332	71545.2	56486.1	78236.1	54288.1	1.44113	0.527197	0.408997
						0	0.662167	JL102921_110821_RPB4_C2_100B.03356.03356.5	N	3.9435	0.165315		1//11	13//54	1.779	1.5625	K.KGIAK[1193.73]EHAK.W	YIL021W	1	RPB3	KGIAKEHAK	165	//9	9//39	2.1645	1.66667	R.LKGK[1387.84]EGR.I	YDL140C	1	RPB1	LKGKEGR	332	234392	168102	256518	159147	1.61183	0.6887	0.5705
	7	RPB1:15---RPB3:15	10.3038	-0.0797937	0.0797937
						-2	8.3162	JL102921_110821_RPB4_C2_70B.26098.26098.5	N	10.3038	0.251237		//13	29//199	9.18325	1.41667	K.IREASK[2271.19]DNVDFILSNVDLAM[147.04]ANSLR.R	YIL021W	1	RPB3	IREASKDNVDFILSNVDLAMANSLR	15	2//18	14//117	1.1205	0.633333	R.TVK[3213.65]EVQFGLFSPEEVR.A	YDL140C	1	RPB1	TVKEVQFGLFSPEEVR	15	162599	198957	176948	201266	0.879171	-0.185784	-0.303984
						0	14.3444	JL102921_110821_RPB4_C2_100B.23478.23478.5	N	9.9645	0.279969		//13	18//199	2.26225	0.708333	K.IREASK[2271.16]DNVDFILSNVDLAM[147.04]ANSLR.R	YIL021W	1	RPB3	IREASKDNVDFILSNVDLAMANSLR	15	//18	18//117	7.70225	1.76667	R.TVK[3213.62]EVQFGLFSPEEVR.A	YDL140C	1	RPB1	TVKEVQFGLFSPEEVR	15	205030	227163	223411	227620	0.981509	-0.0269272	-0.145127
						0	17.4274	JL102921_110821_RPB4_C2_100B.23581.23581.5	N	7.0165	0.200463		//13	21//199	5.442	0.979167	K.IREASK[2271.15]DNVDFILSNVDLAM[147.04]ANSLR.R	YIL021W	1	RPB3	IREASKDNVDFILSNVDLAMANSLR	15	1//18	13//117	1.5745	0.666667	R.TVK[3213.6]EVQFGLFSPEEVR.A	YDL140C	1	RPB1	TVKEVQFGLFSPEEVR	15	270187	299305	294410	299903	0.981684	-0.0266697	-0.14487
4	RPB1---RPB5
	1	RPB1:330---RPB5:171	2.6965	-0.29511	0.29511
						0	6.21551	JL102921_110821_RPB4_C2_30B.05647.05647.5	P	2.6965	0.111393	0.265	1//8	10//46	2.34175	1.1875	R.LK[1193.73]ESQLPR.I	YBR154C	1	RPB5	LKESQLPR	171	1//7	3//39	0.35475	0.357143	R.LK[1376.82]GKEGR.I	YDL140C	1	RPB1	LKGKEGR	330	318811	417877	346607	425279	0.81501	-0.29511	-0.41331
	2	RPB1:431---RPB5:171	6.49525	0.135783	-0.135783
						-1	6.31129	JL102921_110821_RPB4_C2_D.13748.13748.5	N	6.49525	0.199238		//16	13//98	4.6325	1.42308	R.AGDIQLQYGWK[1376.8]VER.H	YDL140C	1	RPB1	AGDIQLQYGWKVER	431	1//8	8//40	1.86275	1.35714	R.LK[2069.1]ESQLPR.I	YBR154C	1	RPB5	LKESQLPR	171	942219	943831	1.02791e+06	935575	1.09869	0.135783	0.0175829
	3	RPB1:129---RPB5:171	7.0675	1.0105	-1.0105
						-1	0.199479	JL102921_110821_RPB4_C2_50B.14800.14800.4	NP	7.0675	0.261203	0.345	//12	7//46	1.27525	0.944444	R.Q[111.03]ALAIK[1376.82]DSK.K	YDL140C	1	RPB1	QALAIKDSK	129	//8	15//37	5.79225	2.625	R.LK[1362.8]ESQLPR.I	YBR154C	1	RPB5	LKESQLPR	171	1639556	1493961	1.79046e+06	1.46424e+06	1.2228	0.290183	0.171983
						0	1.63934	JL102921_110821_RPB4_C2_100B.11936.11936.4	NP	7.00875	0.276572	5.21e-09	//12	7//46	1.31025	0.944444	R.Q[111.03]ALAIK[1376.82]DSK.K	YDL140C	1	RPB1	QALAIKDSK	129	//8	13//37	5.6985	2.1875	R.LK[1362.8]ESQLPR.I	YBR154C	1	RPB5	LKESQLPR	171	893813	587013	978846	547275	1.78858	0.838817	0.720617
						0	3.42752	JL102921_110821_RPB4_C2_70B.11876.11876.4	N	6.83675	0.259617		//8	15//37	5.52025	3.21429	R.LK[1362.8]ESQLPR.I	YBR154C	1	RPB5	LKESQLPR	171	//10	8//38	1.3165	1.28571	R.Q[111.03]ALAIK[1376.83]DSK.K	YDL140C	1	RPB1	QALAIKDSK	129	818933	683431	895072	662088	1.35189	0.434981	0.316781
						-1	1.75565	JL102921_110821_RPB4_C2_70B.11890.11890.4	N	6.68375	0.229072		//8	15//37	5.44725	3.21429	R.LK[1362.79]ESQLPR.I	YBR154C	1	RPB5	LKESQLPR	171	//10	8//38	1.2365	1.42857	R.Q[111.03]ALAIK[1376.82]DSK.K	YDL140C	1	RPB1	QALAIKDSK	129	828311	688585	905354	666721	1.35792	0.441398	0.323198
						-1	-2.29786	JL102921_110821_RPB4_C2_50B.11307.11307.4	NP	6.439	0.189871	0.53	//11	13//43	3.303	1.83333	R.QALAIK[1376.82]DSK.K	YDL140C	1	RPB1	QALAIKDSK	129	//8	9//37	3.136	1.5625	R.LK[1379.82]ESQLPR.I	YBR154C	1	RPB5	LKESQLPR	171	1.39967e+06	934553	1.53265e+06	873909	1.75378	0.81047	0.69227
						0	2.40675	JL102921_110821_RPB4_C2_30B.07787.07787.3	NP	6.14175	0.195255	0.0238	//11	13//34	4.847	2	R.QALAIK[1376.82]DSK.K	YDL140C	1	RPB1	QALAIKDSK	129	1//8	8//29	1.29475	1.125	R.LK[1379.82]ESQLPR.I	YBR154C	1	RPB5	LKESQLPR	171	1.63438e+06	1.02934e+06	1.7904e+06	952117	1.88044	0.911072	0.792872
						-1	5.60498	JL102921_110821_RPB4_C2_C18.11108.11108.3	NP	5.9495	0.206168	0.479	//12	13//36	4.542	2	R.Q[111.03]ALAIK[1376.82]DSK.K	YDL140C	1	RPB1	QALAIKDSK	129	//8	8//29	1.4075	1.5	R.LK[1362.8]ESQLPR.I	YBR154C	1	RPB5	LKESQLPR	171	938359	453069	1.02961e+06	394461	2.61018	1.38415	1.26595
						0	1.33514	JL102921_110821_RPB4_C2_C18.07937.07937.3	NP	5.8085	0.173318	0.33	//11	13//34	4.75675	1.83333	R.QALAIK[1376.82]DSK.K	YDL140C	1	RPB1	QALAIKDSK	129	//8	7//29	1.05175	0.9375	R.LK[1379.82]ESQLPR.I	YBR154C	1	RPB5	LKESQLPR	171	1.15773e+06	456956	1.27156e+06	374087	3.39911	1.76516	1.64696
						0	2.30389	JL102921_110821_RPB4_C2_C18.11109.11109.4	NP	5.67875	0.193821	0.000471	//12	8//46	1.0935	1.11111	R.Q[111.03]ALAIK[1376.82]DSK.K	YDL140C	1	RPB1	QALAIKDSK	129	//8	14//37	4.58525	2.5625	R.LK[1362.8]ESQLPR.I	YBR154C	1	RPB5	LKESQLPR	171	1.27499e+06	789010	1.39687e+06	727321	1.92057	0.941536	0.823336
						0	5.5496	JL102921_110821_RPB4_C2_C18.11344.11344.3	NP	5.6005	0.216215	0.266	1//12	14//36	4.2415	2.11111	R.Q[111.03]ALAIK[1376.82]DSK.K	YDL140C	1	RPB1	QALAIKDSK	129	//8	7//29	1.359	1.25	R.LK[1362.8]ESQLPR.I	YBR154C	1	RPB5	LKESQLPR	171	775322	410971	850276	366336	2.32103	1.21477	1.09657
						-1	5.60498	JL102921_110821_RPB4_C2_C18.11105.11105.3	NP	5.543	0.183726	0.544	1//12	13//36	4.0155	1.88889	R.Q[111.03]ALAIK[1376.82]DSK.K	YDL140C	1	RPB1	QALAIKDSK	129	//8	8//29	1.5275	1.5	R.LK[1362.8]ESQLPR.I	YBR154C	1	RPB5	LKESQLPR	171	858938	449197	942050	399118	2.36033	1.23899	1.12079
						0	3.52735	JL102921_110821_RPB4_C2_C18.08012.08012.4	NP	5.52075	0.154992	0.0739	//11	14//43	3.13725	1.72222	R.QALAIK[1376.82]DSK.K	YDL140C	1	RPB1	QALAIKDSK	129	//8	8//37	2.3835	1.3125	R.LK[1379.82]ESQLPR.I	YBR154C	1	RPB5	LKESQLPR	171	11354970	3.59672e+06	1.24822e+07	2.69236e+06	4.63613	2.21292	2.09472
						0	3.52223	JL102921_110821_RPB4_C2_C18.11347.11347.4	NP	5.1555	0.189872	0.00253	//12	8//46	0.96525	0.833333	R.Q[111.03]ALAIK[1376.82]DSK.K	YDL140C	1	RPB1	QALAIKDSK	129	//8	12//37	4.19025	2.0625	R.LK[1362.8]ESQLPR.I	YBR154C	1	RPB5	LKESQLPR	171	815496	557264	892814	523252	1.70628	0.770854	0.652654
						-1	2.08237	JL102921_110821_RPB4_C2_30B.11123.11123.4	NP	5.14575	0.201988	0.000417	//12	7//46	0.9645	0.888889	R.Q[111.03]ALAIK[1376.82]DSK.K	YDL140C	1	RPB1	QALAIKDSK	129	//8	12//37	4.18125	1.9375	R.LK[1362.8]ESQLPR.I	YBR154C	1	RPB5	LKESQLPR	171	236499	149164	259073	138012	1.87718	0.908564	0.790364
						0	1.30706	JL102921_110821_RPB4_C2_30B.11074.11074.4	P	4.39275	0.176006	0.0294	//12	6//46	0.728	0.555556	R.Q[111.03]ALAIK[1376.82]DSK.K	YDL140C	1	RPB1	QALAIKDSK	129	//8	9//37	3.66475	1.5625	R.LK[1362.8]ESQLPR.I	YBR154C	1	RPB5	LKESQLPR	171	228208	152569	249886	142701	1.75112	0.808274	0.690074
						-1	5.39581	JL102921_110821_RPB4_C2_30B.07799.07799.4	NP	4.2655	0.164225	0.00955	//11	15//43	2.404	2.27778	R.QALAIK[1376.82]DSK.K	YDL140C	1	RPB1	QALAIKDSK	129	//8	6//37	1.8615	1.0625	R.LK[1379.82]ESQLPR.I	YBR154C	1	RPB5	LKESQLPR	171	909382	746860	994077	721913	1.37701	0.461534	0.343334
						0	4.78533	JL102921_110821_RPB4_C2_C18.07983.07983.5	P	3.093	0.0968924	0.585	//11	12//52	0.954	1.22222	R.QALAIK[1376.82]DSK.K	YDL140C	1	RPB1	QALAIKDSK	129	//8	8//45	2.139	1.1875	R.LK[1379.82]ESQLPR.I	YBR154C	1	RPB5	LKESQLPR	171	5113078	2039381	5.61554e+06	1.6756e+06	3.35137	1.74475	1.62655
	4	RPB1:941---RPB5:201	3.437	1.30669	-1.30669
						0	8.57079	JL102921_110821_RPB4_C2_C18.04965.04965.4	P	3.437	0.216034	0.0321	//8	8//33	2.689	1.5	R.K[969.62]SETSGR.Y	YBR154C	1	RPB5	KSETSGR	201	//5	4//20	0.748	1.125	R.K[1170.64]FLR.E	YDL140C	2	RPB1	KFLR	941	157506	74758.8	172840	64787.8	2.66778	1.41564	1.29744
						0	0.584419	JL102921_110821_RPB4_C2_100B.05324.05324.4	P	2.961	0.145133	2.85e-09	//8	9//33	2.619	1.57143	R.K[969.62]SETSGR.Y	YBR154C	1	RPB5	KSETSGR	201	//5	3//20	0.342	0.625	R.K[1170.64]FLR.E	YDL140C	2	RPB1	KFLR	941	1533051	820371	1.68116e+06	732916	2.2938	1.19774	1.07954
	5	RPB1:637---RPB5:171	3.68425	-0.0130235	0.0130235
						0	3.58395	JL102921_110821_RPB4_C2_C18.06338.06338.4	N	3.68425	0.159302		//9	8//42	1.653	1.3125	R.EK[1376.83]GPQVC[160.03]AK.L	YDL140C	1	RPB1	EKGPQVCAK	637	//8	9//37	2.03125	1.78571	R.LK[1422.78]ESQLPR.I	YBR154C	1	RPB5	LKESQLPR	171	326934	359106	356282	359512	0.991013	-0.0130235	-0.131223
	6	RPB1:15---RPB5:171	14.3425	-0.0126549	0.0126549
						-1	0.686237	JL102921_110821_RPB4_C2_70B.17631.17631.5	NP	14.3425	0.504059	0.00274	//18	28//121	12.7765	2.625	R.TVK[1376.82]EVQFGLFSPEEVR.A	YDL140C	1	RPB1	TVKEVQFGLFSPEEVR	15	//8	6//40	1.566	1.25	R.LK[2271.23]ESQLPR.I	YBR154C	1	RPB5	LKESQLPR	171	493057	528775	537473	528064	1.01782	0.0254785	-0.0927215
						0	1.74509	JL102921_110821_RPB4_C2_50B.20475.20475.5	NP	14.0828	0.51606	0.0433	//18	27//121	12.355	2.59375	R.TVK[1376.82]EVQFGLFSPEEVR.A	YDL140C	1	RPB1	TVKEVQFGLFSPEEVR	15	//8	7//40	1.72775	1.3125	R.LK[2271.23]ESQLPR.I	YBR154C	1	RPB5	LKESQLPR	171	906697	925222	988947	919034	1.07607	0.105775	-0.0124253
						-1	2.35295	JL102921_110821_RPB4_C2_D.16892.16892.5	NP	13.9573	0.481301	0.303	//18	27//121	12.3857	2.59375	R.TVK[1376.82]EVQFGLFSPEEVR.A	YDL140C	1	RPB1	TVKEVQFGLFSPEEVR	15	//8	6//40	1.5715	1.25	R.LK[2271.23]ESQLPR.I	YBR154C	1	RPB5	LKESQLPR	171	719144	811849	783432	815013	0.961251	-0.0570156	-0.175216
						-2	-3.21584	JL102921_110821_RPB4_C2_D.16902.16902.5	NP	13.6342	0.478193	0.0779	//18	27//121	12.1508	2.59375	R.TVK[1376.82]EVQFGLFSPEEVR.A	YDL140C	1	RPB1	TVKEVQFGLFSPEEVR	15	//8	6//40	1.4835	1.25	R.LK[2271.23]ESQLPR.I	YBR154C	1	RPB5	LKESQLPR	171	720403	820829	784712	824782	0.951418	-0.0718493	-0.190049
						-1	4.77	JL102921_110821_RPB4_C2_100B.17779.17779.5	N	13.581	0.462017		//18	29//121	11.9992	2.83333	R.TVK[1376.81]EVQFGLFSPEEVR.A	YDL140C	1	RPB1	TVKEVQFGLFSPEEVR	15	//8	7//40	1.58175	1.5	R.LK[2271.22]ESQLPR.I	YBR154C	1	RPB5	LKESQLPR	171	203087	231122	221219	232208	0.95268	-0.0699366	-0.188137
						0	4.29419	JL102921_110821_RPB4_C2_30B.15809.15809.5	NP	13.233	0.486034	2.43e-06	//18	27//121	11.6367	2.59375	R.TVK[1376.82]EVQFGLFSPEEVR.A	YDL140C	1	RPB1	TVKEVQFGLFSPEEVR	15	//8	7//40	1.59625	1.3125	R.LK[2271.23]ESQLPR.I	YBR154C	1	RPB5	LKESQLPR	171	552199	606427	601769	607103	0.991215	-0.0127306	-0.130931
						0	1.64705	JL102921_110821_RPB4_C2_100B.17744.17744.5	NP	12.9865	0.453107	1.97e-22	//18	27//121	11.4055	2.40625	R.TVK[1376.82]EVQFGLFSPEEVR.A	YDL140C	1	RPB1	TVKEVQFGLFSPEEVR	15	//8	7//40	1.581	1.3125	R.LK[2271.23]ESQLPR.I	YBR154C	1	RPB5	LKESQLPR	171	325248	372694	354256	374696	0.945449	-0.0809287	-0.199129
						-1	3.98591	JL102921_110821_RPB4_C2_50B.20448.20448.5	N	12.2477	0.461761		//18	26//121	10.5653	2.5	R.TVK[1376.81]EVQFGLFSPEEVR.A	YDL140C	1	RPB1	TVKEVQFGLFSPEEVR	15	//8	7//40	1.6825	1.5	R.LK[2271.22]ESQLPR.I	YBR154C	1	RPB5	LKESQLPR	171	933530	992326	1.01773e+06	990065	1.02794	0.0397609	-0.0784391
						-1	0.0172009	JL102921_110821_RPB4_C2_50B.20527.20527.4	N	12.0328	0.377919		1//18	34//95	10.9748	3.36667	R.TVK[1376.82]EVQFGLFSPEEVR.A	YDL140C	1	RPB1	TVKEVQFGLFSPEEVR	15	1//8	7//32	1.058	1.07143	R.LK[2271.23]ESQLPR.I	YBR154C	1	RPB5	LKESQLPR	171	833789	1.02108e+06	907356	1.03301e+06	0.878359	-0.187118	-0.305318
						0	-0.117709	JL102921_110821_RPB4_C2_70B.17569.17569.5	NP	12.001	0.396767	0.0129	//18	26//121	10.4785	2.25	R.TVK[1376.82]EVQFGLFSPEEVR.A	YDL140C	1	RPB1	TVKEVQFGLFSPEEVR	15	//8	7//40	1.5225	1.3125	R.LK[2271.23]ESQLPR.I	YBR154C	1	RPB5	LKESQLPR	171	432453	482141	471186	483417	0.974699	-0.0369715	-0.155172
						1	-1.74094	JL102921_110821_RPB4_C2_C18.16941.16941.4	P	11.9543	0.335921	0.0294	//18	25//95	10.8788	2.4375	R.TVK[1376.82]EVQFGLFSPEEVR.A	YDL140C	1	RPB1	TVKEVQFGLFSPEEVR	15	//8	6//32	1.0755	1.25	R.LK[2271.23]ESQLPR.I	YBR154C	1	RPB5	LKESQLPR	171	789888	887712	860549	890774	0.966069	-0.0498017	-0.168002
						0	0.0802992	JL102921_110821_RPB4_C2_D.16926.16926.4	N	11.4345	0.330716		//18	30//95	10.3015	3.26667	R.TVK[1376.82]EVQFGLFSPEEVR.A	YDL140C	1	RPB1	TVKEVQFGLFSPEEVR	15	1//8	7//32	1.133	1.5	R.LK[2271.23]ESQLPR.I	YBR154C	1	RPB5	LKESQLPR	171	1.6224e+06	1.67609e+06	1.76933e+06	1.66714e+06	1.0613	0.0858275	-0.0323725
						0	5.07852	JL102921_110821_RPB4_C2_30B.15820.15820.5	NP	10.9273	0.401959	3.09e-06	1//18	25//121	9.34825	2.15625	R.TVK[1376.82]EVQFGLFSPEEVR.A	YDL140C	1	RPB1	TVKEVQFGLFSPEEVR	15	//8	7//40	1.579	1.3125	R.LK[2271.23]ESQLPR.I	YBR154C	1	RPB5	LKESQLPR	171	594692	682289	647722	686037	0.944149	-0.0829128	-0.201113
						-1	-2.83901	JL102921_110821_RPB4_C2_30B.15786.15786.4	NP	10.656	0.315322	5.06e-05	//18	26//95	9.66475	2.34375	R.TVK[1376.82]EVQFGLFSPEEVR.A	YDL140C	1	RPB1	TVKEVQFGLFSPEEVR	15	1//8	7//32	0.99125	1.125	R.LK[2271.23]ESQLPR.I	YBR154C	1	RPB5	LKESQLPR	171	663124	691488	723098	688496	1.05026	0.0707439	-0.0474561
						-1	0.219902	JL102921_110821_RPB4_C2_70B.17636.17636.4	P	10.2278	0.320283	0.393	//18	26//95	9.4835	2.46875	R.TVK[1376.82]EVQFGLFSPEEVR.A	YDL140C	1	RPB1	TVKEVQFGLFSPEEVR	15	1//8	6//32	0.74425	1.0625	R.LK[2271.23]ESQLPR.I	YBR154C	1	RPB5	LKESQLPR	171	711459	858882	774382	867778	0.892374	-0.164279	-0.282479
						-1	-2.60371	JL102921_110821_RPB4_C2_30B.15782.15782.4	P	10.0545	0.303161	0.000122	//18	26//95	9.26125	2.34375	R.TVK[1376.82]EVQFGLFSPEEVR.A	YDL140C	1	RPB1	TVKEVQFGLFSPEEVR	15	1//8	6//32	0.79325	0.6875	R.LK[2271.23]ESQLPR.I	YBR154C	1	RPB5	LKESQLPR	171	662047	694100	721878	691499	1.04393	0.0620274	-0.0561726
						-1	-2.60371	JL102921_110821_RPB4_C2_70B.17623.17623.4	P	9.934	0.311543	0.266	//18	26//95	9.32575	2.46875	R.TVK[1376.82]EVQFGLFSPEEVR.A	YDL140C	1	RPB1	TVKEVQFGLFSPEEVR	15	1//8	6//32	0.60825	0.8125	R.LK[2271.23]ESQLPR.I	YBR154C	1	RPB5	LKESQLPR	171	864150	979474	941353	983684	0.956967	-0.0634585	-0.181659
						-1	-0.490269	JL102921_110821_RPB4_C2_C18.16934.16934.5	NP	9.3235	0.321628	6.63e-05	//18	25//121	8.0065	2	R.TVK[1376.82]EVQFGLFSPEEVR.A	YDL140C	1	RPB1	TVKEVQFGLFSPEEVR	15	//8	6//40	1.317	1.0625	R.LK[2271.23]ESQLPR.I	YBR154C	1	RPB5	LKESQLPR	171	549070	579150	598649	577354	1.03688	0.0522538	-0.0659462
						-1	0.0172009	JL102921_110821_RPB4_C2_D.16887.16887.4	N	9.006	0.281275		//18	28//95	7.863	2.8	R.TVK[1376.82]EVQFGLFSPEEVR.A	YDL140C	1	RPB1	TVKEVQFGLFSPEEVR	15	1//8	8//32	1.143	1.57143	R.LK[2271.23]ESQLPR.I	YBR154C	1	RPB5	LKESQLPR	171	1.71426e+06	1.83627e+06	1.86871e+06	1.83357e+06	1.01916	0.0273873	-0.0908127
						0	6.15699	JL102921_110821_RPB4_C2_30B.15845.15845.5	NP	8.41575	0.28017	4.94e-06	1//18	22//121	6.941	1.65625	R.TVK[1376.82]EVQFGLFSPEEVR.A	YDL140C	1	RPB1	TVKEVQFGLFSPEEVR	15	//8	7//40	1.47475	1.3125	R.LK[2271.23]ESQLPR.I	YBR154C	1	RPB5	LKESQLPR	171	524568	619975	571124	625159	0.913567	-0.130418	-0.248618
						-1	4.89868	JL102921_110821_RPB4_C2_50B.20467.20467.3	N	5.9235	0.207329		//18	17//69	5.023	1.3	R.TVK[1376.81]EVQFGLFSPEEVR.A	YDL140C	1	RPB1	TVKEVQFGLFSPEEVR	15	//8	5//24	0.9005	0.714286	R.LK[2271.22]ESQLPR.I	YBR154C	1	RPB5	LKESQLPR	171	433022	446542	472246	444071	1.06345	0.0887481	-0.0294519
						0	1.42528	JL102921_110821_RPB4_C2_C18.16973.16973.3	N	5.28825	0.165057		//18	16//69	3.8225	1.13333	R.TVK[1376.82]EVQFGLFSPEEVR.A	YDL140C	1	RPB1	TVKEVQFGLFSPEEVR	15	//8	7//24	1.46575	1	R.LK[2271.23]ESQLPR.I	YBR154C	1	RPB5	LKESQLPR	171	264226	258998	288324	256095	1.12585	0.171012	0.0528118
	7	RPB1:1003---RPB5:197	10.0245	-0.0643917	0.0643917
						-1	3.91729	JL102921_110821_RPB4_C2_50B.11974.11974.6	N	10.0245	0.348587		//11	17//55	7.895	2.5	R.GK[1475.93]NEIIQNAQR.D	YDL140C	1	RPB1	GKNEIIQNAQR	1003	//11	8//39	2.1295	1.3125	K.RGEVVK[1676.93]IIR.K	YBR154C	1	RPB5	RGEVVKIIR	197	1.37432e+06	1.58311e+06	1.4968e+06	1.59243e+06	0.939944	-0.0893527	-0.207553
						0	0.316984	JL102921_110821_RPB4_C2_50B.12141.12141.4	N	9.96875	0.311928		//11	22//55	7.67325	3.5	R.GK[1475.94]NEIIQNAQR.D	YDL140C	1	RPB1	GKNEIIQNAQR	1003	//11	14//39	2.2955	2.3125	K.RGEVVK[1676.94]IIR.K	YBR154C	1	RPB5	RGEVVKIIR	197	2.35732e+06	3.05778e+06	2.56324e+06	3.10919e+06	0.824406	-0.278573	-0.396773
						0	-0.291477	JL102921_110821_RPB4_C2_100B.09532.09532.6	NP	9.78125	0.357162	0.00971	//11	16//67	7.66825	2.22727	R.GK[1475.94]NEIIQNAQR.D	YDL140C	1	RPB1	GKNEIIQNAQR	1003	//11	9//48	2.113	1.22222	K.RGEVVK[1676.94]IIR.K	YBR154C	1	RPB5	RGEVVKIIR	197	386907	449092	421345	452069	0.932037	-0.10154	-0.21974
						0	2.73189	JL102921_110821_RPB4_C2_50B.11951.11951.6	N	9.60725	0.350348		//11	15//55	7.53575	2.25	R.GK[1475.95]NEIIQNAQR.D	YDL140C	1	RPB1	GKNEIIQNAQR	1003	//11	8//39	2.0715	1.3125	K.RGEVVK[1676.95]IIR.K	YBR154C	1	RPB5	RGEVVKIIR	197	982553	1.13176e+06	1.07011e+06	1.13842e+06	0.939998	-0.0892705	-0.20747
						0	0.00370175	JL102921_110821_RPB4_C2_70B.09528.09528.6	N	9.48375	0.344983		//11	15//55	7.5665	2.25	R.GK[1475.94]NEIIQNAQR.D	YDL140C	1	RPB1	GKNEIIQNAQR	1003	//11	8//39	1.91725	1.3125	K.RGEVVK[1676.94]IIR.K	YBR154C	1	RPB5	RGEVVKIIR	197	494677	555700	538932	557592	0.966534	-0.049108	-0.167308
						0	3.84594	JL102921_110821_RPB4_C2_30B.07834.07834.4	NP	8.52625	0.266225	0.0547	//11	21//55	7.16	3.13636	R.GK[1475.94]NEIIQNAQR.D	YDL140C	1	RPB1	GKNEIIQNAQR	1003	//11	10//39	1.36625	1.22222	K.RGEVVK[1676.94]IIR.K	YBR154C	1	RPB5	RGEVVKIIR	197	908746	1.11559e+06	988893	1.12887e+06	0.876005	-0.190989	-0.309189
						0	4.35386	JL102921_110821_RPB4_C2_30B.09338.09338.5	P	8.51075	0.392861	0.167	//11	19//67	8.067	2.5	R.GK[1475.94]NEIIQNAQR.D	YDL140C	1	RPB1	GKNEIIQNAQR	1003	//11	6//48	0.44375	0.611111	K.RGEVVK[1676.94]IIR.K	YBR154C	1	RPB5	RGEVVKIIR	197	183176	230906	199258	234207	0.850777	-0.233147	-0.351347
						0	0.876613	JL102921_110821_RPB4_C2_100B.09512.09512.4	N	8.17375	0.282477		//11	21//55	7.1665	3.45	R.GK[1475.94]NEIIQNAQR.D	YDL140C	1	RPB1	GKNEIIQNAQR	1003	//11	10//39	1.00725	1.25	K.RGEVVK[1676.94]IIR.K	YBR154C	1	RPB5	RGEVVKIIR	197	853061	887463	930239	883397	1.05303	0.0745398	-0.0436602
						0	3.56613	JL102921_110821_RPB4_C2_C18.08418.08418.4	NP	7.61825	0.22901	0.612	//11	24//55	6.28475	3.13636	R.GK[1475.94]NEIIQNAQR.D	YDL140C	1	RPB1	GKNEIIQNAQR	1003	//11	11//39	1.3335	1.27778	K.RGEVVK[1676.94]IIR.K	YBR154C	1	RPB5	RGEVVKIIR	197	1.18157e+06	1.40594e+06	1.28632e+06	1.4186e+06	0.906751	-0.141221	-0.259421
						0	5.28658	JL102921_110821_RPB4_C2_C18.08412.08412.5	P	7.47725	0.305893	0.158	//11	19//67	7.216	2.36364	R.GK[1475.94]NEIIQNAQR.D	YDL140C	1	RPB1	GKNEIIQNAQR	1003	//11	6//48	0.26125	0.555556	K.RGEVVK[1676.94]IIR.K	YBR154C	1	RPB5	RGEVVKIIR	197	1.24294e+06	1.62602e+06	1.35135e+06	1.65455e+06	0.816745	-0.292042	-0.410242
						0	6.68565	JL102921_110821_RPB4_C2_C18.08457.08457.5	P	7.465	0.310783	0.0945	//11	18//67	6.8585	2.31818	R.GK[1475.94]NEIIQNAQR.D	YDL140C	1	RPB1	GKNEIIQNAQR	1003	//11	6//48	0.6065	0.722222	K.RGEVVK[1676.94]IIR.K	YBR154C	1	RPB5	RGEVVKIIR	197	1.1735e+06	1.54156e+06	1.27577e+06	1.56916e+06	0.813028	-0.298623	-0.416823
						0	2.01481	JL102921_110821_RPB4_C2_50B.12223.12223.4	N	7.4275	0.256967		//11	19//55	6.47075	2.7	R.GK[1475.93]NEIIQNAQR.D	YDL140C	1	RPB1	GKNEIIQNAQR	1003	//11	11//39	0.95675	1.25	K.RGEVVK[1676.93]IIR.K	YBR154C	1	RPB5	RGEVVKIIR	197	1265544	2.0476e+06	1.37115e+06	2.11721e+06	0.647621	-0.626777	-0.744977
						0	3.95602	JL102921_110821_RPB4_C2_50B.13533.13533.5	N	7.343	0.25536		//11	15//69	6.00775	2.1	R.GK[1319.83]NEIIQNAQR.D	YDL140C	1	RPB1	GKNEIIQNAQR	1003	//10	6//41	1.33525	0.928571	R.GEVVK[1676.93]IIR.K	YBR154C	1	RPB5	GEVVKIIR	197	764165	878671	832283	883690	0.941827	-0.0864653	-0.204665
						-1	7.68324	JL102921_110821_RPB4_C2_50B.11885.11885.4	N	6.9365	0.243245		//11	19//55	5.97725	2.7	R.GK[1475.92]NEIIQNAQR.D	YDL140C	1	RPB1	GKNEIIQNAQR	1003	//11	8//39	0.95925	0.9375	K.RGEVVK[1676.92]IIR.K	YBR154C	1	RPB5	RGEVVKIIR	197	1.02214e+06	1.26718e+06	1.11213e+06	1.2834e+06	0.86655	-0.206646	-0.324846
						0	3.09977	JL102921_110821_RPB4_C2_C18.08401.08401.4	P	6.36675	0.201712	0.62	//11	20//55	5.64675	2.63636	R.GK[1475.94]NEIIQNAQR.D	YDL140C	1	RPB1	GKNEIIQNAQR	1003	//11	10//39	0.72	0.944444	K.RGEVVK[1676.94]IIR.K	YBR154C	1	RPB5	RGEVVKIIR	197	959955	1.12427e+06	1.04528e+06	1.1327e+06	0.922823	-0.115874	-0.234074
						0	0.560458	JL102921_110821_RPB4_C2_50B.13526.13526.3	N	5.9505	0.229718		//11	15//45	4.0165	2.4	R.GK[1319.84]NEIIQNAQR.D	YDL140C	1	RPB1	GKNEIIQNAQR	1003	//10	7//25	1.934	1.21429	R.GEVVK[1676.94]IIR.K	YBR154C	1	RPB5	GEVVKIIR	197	832437	879790	907581	877249	1.03458	0.0490412	-0.0691588
						-2	0.124808	JL102921_110821_RPB4_C2_50B.13502.13502.3	N	5.24725	0.179556		//11	13//45	3.55025	1.85	R.GK[1319.84]NEIIQNAQR.D	YDL140C	1	RPB1	GKNEIIQNAQR	1003	//10	9//25	1.697	1.35714	R.GEVVK[1676.94]IIR.K	YBR154C	1	RPB5	GEVVKIIR	197	561820	537905	613215	530408	1.15612	0.209291	0.091091
						0	0.927344	JL102921_110821_RPB4_C2_70B.10833.10833.3	N	5.2145	0.179029		//11	14//45	3.2145	2.2	R.GK[1319.84]NEIIQNAQR.D	YDL140C	1	RPB1	GKNEIIQNAQR	1003	1//10	8//25	2	1.28571	R.GEVVK[1676.94]IIR.K	YBR154C	1	RPB5	GEVVKIIR	197	344426	318551	376071	312794	1.20229	0.265789	0.147589
						0	1.83772	JL102921_110821_RPB4_C2_50B.11902.11902.3	N	3.7175	0.171231		//11	10//43	2.4815	1.65	R.GK[1475.94]NEIIQNAQR.D	YDL140C	1	RPB1	GKNEIIQNAQR	1003	//11	7//30	1.236	1	K.RGEVVK[1676.94]IIR.K	YBR154C	1	RPB5	RGEVVKIIR	197	650269	451641	711833	425274	1.67382	0.743147	0.624947
						0	7.41866	JL102921_110821_RPB4_C2_C18.08436.08436.3	P	3.12075	0.113181	0.588	//11	9//43	1.87525	1.18182	R.GK[1475.94]NEIIQNAQR.D	YDL140C	1	RPB1	GKNEIIQNAQR	1003	//11	7//30	1.2455	0.888889	K.RGEVVK[1676.94]IIR.K	YBR154C	1	RPB5	RGEVVKIIR	197	302223	330151	329374	330339	0.997078	-0.00422185	-0.122422
						-1	1.79904	JL102921_110821_RPB4_C2_C18.08434.08434.3	P	3.0475	0.113736	0.457	//11	8//43	1.6595	1	R.GK[1475.94]NEIIQNAQR.D	YDL140C	1	RPB1	GKNEIIQNAQR	1003	//11	8//30	1.388	0.944444	K.RGEVVK[1676.94]IIR.K	YBR154C	1	RPB5	RGEVVKIIR	197	325670	348985	355010	348486	1.01872	0.0267585	-0.0914415
						0	3.50125	JL102921_110821_RPB4_C2_30B.07826.07826.3	P	2.53225	0.0962412	0.249	//11	6//43	0.72925	0.363636	R.GK[1475.94]NEIIQNAQR.D	YDL140C	1	RPB1	GKNEIIQNAQR	1003	//11	9//30	1.803	1.16667	K.RGEVVK[1676.94]IIR.K	YBR154C	1	RPB5	RGEVVKIIR	197	539887	581451	588491	580926	1.01302	0.0186669	-0.0995331
	8	RPB1:1003---RPB5:166	7.02125	0.191656	-0.191656
						0	4.73027	JL102921_110821_RPB4_C2_30B.07796.07796.4	P	7.02125	0.23951	0.713	//11	19//58	6.8535	2.63636	R.GK[1064.68]NEIIQNAQR.D	YDL140C	1	RPB1	GKNEIIQNAQR	1003	//7	3//21	0.16775	0.5	R.ELLK[1676.94]R.Y	YBR154C	1	RPB5	ELLKR	166	1.35657e+06	1.31296e+06	1.4805e+06	1.29632e+06	1.14207	0.191656	0.0734564
	9	RPB1:1003---RPB5:201	8.07075	0.155565	-0.155565
						0	6.52692	JL102921_110821_RPB4_C2_C18.05505.05505.4	P	8.07075	0.324407	0.00134	//11	18//58	7.36	2.45455	R.GK[1170.64]NEIIQNAQR.D	YDL140C	1	RPB1	GKNEIIQNAQR	1003	//8	5//34	0.71075	0.928571	R.K[1676.94]SETSGR.Y	YBR154C	1	RPB5	KSETSGR	201	160219	159912	174796	158448	1.10318	0.141663	0.0234631
						0	14.1292	JL102921_110821_RPB4_C2_C18.05470.05470.4	P	7.8595	0.345746	0.0185	//11	17//58	7.04525	2.27273	R.GK[1170.64]NEIIQNAQR.D	YDL140C	1	RPB1	GKNEIIQNAQR	1003	//8	5//34	0.81425	0.928571	R.K[1676.94]SETSGR.Y	YBR154C	1	RPB5	KSETSGR	201	120228	121515	131149	120573	1.08771	0.121289	0.00308913
						3	-23.5653	JL102921_110821_RPB4_C2_30B.05821.05821.4	P	7.08475	0.267425	0.341	//11	16//58	6.40225	2.09091	R.GK[1170.64]NEIIQNAQR.D	YDL140C	1	RPB1	GKNEIIQNAQR	1003	//8	4//34	0.6825	0.642857	R.K[1676.94]SETSGR.Y	YBR154C	1	RPB5	KSETSGR	201	372773	358122	406859	353273	1.15168	0.203744	0.0855442
	10	RPB1:1286---RPB5:45	4.85175	-0.250808	0.250808
						0	5.48617	JL102921_110821_RPB4_C2_30B.05436.05436.5	N	4.85175	0.167066		//12	8//79	2.01675	0.818182	K.AK[1479.78]YC[160.03]DSM[147.04]GRPQR.K	YBR154C	1	RPB5	AKYCDSMGRPQR	45	//10	9//43	2.835	1.71429	R.VVM[147.04]M[147.04]K[1890.94]YDR.K	YDL140C	1	RPB1	VVMMKYDR	1286	291348	371368	316877	377044	0.840426	-0.250808	-0.369008
	11	RPB1:1286---RPB5:197	5.0625	-0.429776	0.429776
						0	0.0871584	JL102921_110821_RPB4_C2_100B.09064.09064.4	NP	5.0625	0.198327	0.231	//10	9//39	2.8795	1.5	R.VVM[147.04]M[147.04]K[1319.84]YDR.K	YDL140C	1	RPB1	VVMMKYDR	1286	//10	8//37	2.183	1.25	R.GEVVK[1479.77]IIR.K	YBR154C	1	RPB5	GEVVKIIR	197	456176	655389	495249	671927	0.737058	-0.44015	-0.55835
						-1	7.40559	JL102921_110821_RPB4_C2_70B.08971.08971.4	N	4.3685	0.151961		//10	10//39	2.6355	1.78571	R.VVM[147.04]M[147.04]K[1319.82]YDR.K	YDL140C	1	RPB1	VVMMKYDR	1286	//10	7//37	1.733	1.21429	R.GEVVK[1479.75]IIR.K	YBR154C	1	RPB5	GEVVKIIR	197	458997	650821	498416	666569	0.747735	-0.419402	-0.537602
	12	RPB1:332---RPB5:45	4.736	0.356329	-0.356329
						0	1.86096	JL102921_110821_RPB4_C2_70B.04146.04146.5	N	4.736	0.197973		//12	13//82	3.095	1.36364	K.AK[1193.73]YC[160.03]DSM[147.04]GRPQR.K	YBR154C	1	RPB5	AKYCDSMGRPQR	45	//9	6//34	1.641	1.08333	R.LKGK[1890.92]EGR.I	YDL140C	1	RPB1	LKGKEGR	332	226583	198314	247537	193363	1.28016	0.356329	0.238129
	13	RPB1:332---RPB5:171	6.92825	0.0624795	-0.0624795
						0	1.13877	JL102921_110821_RPB4_C2_30B.05638.05638.4	NP	6.92825	0.255839	0.119	//8	14//38	5.757	2.5625	R.LK[1193.73]ESQLPR.I	YBR154C	1	RPB5	LKESQLPR	171	1//9	7//32	1.17125	0.785714	R.LKGK[1376.82]EGR.I	YDL140C	1	RPB1	LKGKEGR	332	458146	480193	499552	478379	1.04426	0.0624795	-0.0557205
	14	RPB1:2---RPB5:201	4.004	-0.364625	0.364625
						0	3.16356	JL102921_110821_RPB4_C2_C18.06534.06534.4	P	4.004	0.151486	0.129	//12	11//60	3.12675	1.5	M.V[1141.62]GQQYSSAPLR.T	YDL140C	1	RPB1	VGQQYSSAPLR	2	1//8	4//34	0.87725	0.642857	R.K[1611.88]SETSGR.Y	YBR154C	1	RPB5	KSETSGR	201	705605	966379	766619	987057	0.776671	-0.364625	-0.482825
	15	RPB1:1205---RPB5:201	6.0885	-0.171274	0.171274
						0	7.88978	JL102921_110821_RPB4_C2_30B.05985.05985.4	P	6.0885	0.25639	0.0529	1//18	20//91	5.3515	1.53125	R.AAM[147.04]NDK[1170.64]DLTM[147.04]GQVGER.I	YDL140C	1	RPB1	AAMNDKDLTMGQVGER	1205	//8	5//30	0.737	0.714286	R.K[2174.05]SETSGR.Y	YBR154C	1	RPB5	KSETSGR	201	93428.1	125444	101537	127922	0.793743	-0.333256	-0.451456
						0	11.9742	JL102921_110821_RPB4_C2_C18.05543.05543.4	P	4.57525	0.250877	0.718	//18	17//91	3.732	1.15625	R.AAM[147.04]NDK[1170.64]DLTM[147.04]GQVGER.I	YDL140C	1	RPB1	AAMNDKDLTMGQVGER	1205	//8	5//30	0.84325	0.714286	R.K[2174.05]SETSGR.Y	YBR154C	1	RPB5	KSETSGR	201	36180.1	39648.3	39429	39683.8	0.99358	-0.00929253	-0.127493
	16	RPB1:452---RPB5:171	3.96625	-0.191717	0.191717
						0	2.4389	JL102921_110821_RPB4_C2_30B.05831.05831.5	P	3.96625	0.13676	0.579	//15	9//91	0.8475	0.730769	R.QPSLHK[1376.82]M[147.04]SM[147.04]M[147.04]AHR.V	YDL140C	1	RPB1	QPSLHKMSMMAHR	452	//8	7//40	3.11875	1.3125	R.LK[2007.99]ESQLPR.I	YBR154C	1	RPB5	LKESQLPR	171	321347	436336	349179	445363	0.784033	-0.351014	-0.469214
						-1	4.96179	JL102921_110821_RPB4_C2_30B.05842.05842.6	P	3.138	0.13675	0.606	//15	6//91	0.3705	0.5	R.QPSLHK[1376.82]M[147.04]SM[147.04]M[147.04]AHR.V	YDL140C	1	RPB1	QPSLHKMSMMAHR	452	//8	5//40	2.7675	1	R.LK[2007.99]ESQLPR.I	YBR154C	1	RPB5	LKESQLPR	171	566373	629660	617122	631147	0.977779	-0.0324199	-0.15062
	17	RPB1:1350---RPB5:201	19.6053	0.307822	-0.307822
						0	0.686671	JL102921_110821_RPB4_C2_100B.21879.21879.4	NP	19.6053	0.614951	1.21e-17	1//17	37//129	17.9833	2.97619	R.AALYK[1170.64]EVYNVIASDGSYVNYR.H	YDL140C	1	RPB1	AALYKEVYNVIASDGSYVNYR	1350	//8	6//30	1.622	1.42857	R.K[2801.45]SETSGR.Y	YBR154C	1	RPB5	KSETSGR	201	983706	818348	1.0752e+06	792443	1.35681	0.440221	0.322021
						0	0.260439	JL102921_110821_RPB4_C2_50B.23898.23898.4	NP	19.1983	0.59487	0.0243	1//17	38//129	17.6343	3.07143	R.AALYK[1170.64]EVYNVIASDGSYVNYR.H	YDL140C	1	RPB1	AALYKEVYNVIASDGSYVNYR	1350	//8	7//30	1.564	1.5	R.K[2801.45]SETSGR.Y	YBR154C	1	RPB5	KSETSGR	201	2.09812e+06	1.57663e+06	2.2953e+06	1.50391e+06	1.52622	0.609966	0.491766
						0	0.402516	JL102921_110821_RPB4_C2_70B.21618.21618.4	NP	19.0815	0.62796	0.0137	1//17	35//129	17.5075	2.80952	R.AALYK[1170.64]EVYNVIASDGSYVNYR.H	YDL140C	1	RPB1	AALYKEVYNVIASDGSYVNYR	1350	//8	6//30	1.574	1.42857	R.K[2801.45]SETSGR.Y	YBR154C	1	RPB5	KSETSGR	201	901914	792589	985283	773213	1.27427	0.349672	0.231472
						-1	-5.28057	JL102921_110821_RPB4_C2_50B.24150.24150.4	NP	18.6545	0.582698	0.00299	1//17	35//129	17.1015	2.80952	R.AALYK[1170.64]EVYNVIASDGSYVNYR.H	YDL140C	1	RPB1	AALYKEVYNVIASDGSYVNYR	1350	//8	6//30	1.553	1.42857	R.K[2801.45]SETSGR.Y	YBR154C	1	RPB5	KSETSGR	201	1.03227e+06	999571	1.12657e+06	986959	1.14145	0.19087	0.0726698
						0	4.45171	JL102921_110821_RPB4_C2_30B.19662.19662.4	NP	18.4552	0.565583	3.23e-06	1//17	35//129	16.8785	2.71429	R.AALYK[1170.64]EVYNVIASDGSYVNYR.H	YDL140C	1	RPB1	AALYKEVYNVIASDGSYVNYR	1350	//8	7//30	1.57675	1.5	R.K[2801.45]SETSGR.Y	YBR154C	1	RPB5	KSETSGR	201	506323	487288	552610	480792	1.14937	0.200847	0.0826475
						-1	2.32056	JL102921_110821_RPB4_C2_D.21358.21358.4	NP	18.22	0.583806	0.0957	1//17	36//129	16.7235	2.83333	R.AALYK[1170.64]EVYNVIASDGSYVNYR.H	YDL140C	1	RPB1	AALYKEVYNVIASDGSYVNYR	1350	//8	6//30	1.4965	1.42857	R.K[2801.45]SETSGR.Y	YBR154C	1	RPB5	KSETSGR	201	800815	869362	872826	869296	1.00406	0.00584578	-0.112354
						0	1.75225	JL102921_110821_RPB4_C2_D.21047.21047.4	NP	17.8935	0.556693	0.604	1//17	36//129	16.6017	2.83333	R.AALYK[1170.64]EVYNVIASDGSYVNYR.H	YDL140C	1	RPB1	AALYKEVYNVIASDGSYVNYR	1350	//8	5//30	1.29175	0.928571	R.K[2801.45]SETSGR.Y	YBR154C	1	RPB5	KSETSGR	201	762668	738555	832335	729242	1.14137	0.190766	0.0725661
						0	3.95058	JL102921_110821_RPB4_C2_100B.21851.21851.5	P	17.8502	0.528567	9.65e-08	1//17	36//170	16.9112	2.66667	R.AALYK[1170.64]EVYNVIASDGSYVNYR.H	YDL140C	1	RPB1	AALYKEVYNVIASDGSYVNYR	1350	//8	7//38	0.939	1.5	R.K[2801.45]SETSGR.Y	YBR154C	1	RPB5	KSETSGR	201	537300	423737	587555	407182	1.44298	0.52905	0.41085
						0	5.09106	JL102921_110821_RPB4_C2_C18.20296.20296.4	NP	17.7632	0.503922	0.00886	1//17	38//129	16.4073	3	R.AALYK[1170.64]EVYNVIASDGSYVNYR.H	YDL140C	1	RPB1	AALYKEVYNVIASDGSYVNYR	1350	//8	6//30	1.356	1.21429	R.K[2801.45]SETSGR.Y	YBR154C	1	RPB5	KSETSGR	201	921663	697577	1.00822e+06	666149	1.51351	0.597899	0.479699
						0	1.18394	JL102921_110821_RPB4_C2_D.21049.21049.4	NP	17.334	0.5278	0.0952	1//17	35//129	16.023	2.7381	R.AALYK[1170.64]EVYNVIASDGSYVNYR.H	YDL140C	1	RPB1	AALYKEVYNVIASDGSYVNYR	1350	//8	7//30	1.311	1.07143	R.K[2801.45]SETSGR.Y	YBR154C	1	RPB5	KSETSGR	201	828629	814382	904176	805501	1.1225	0.166718	0.0485181
						0	3.38614	JL102921_110821_RPB4_C2_D.21361.21361.4	NP	17.1737	0.595019	0.0426	1//17	35//129	15.9042	2.66667	R.AALYK[1170.64]EVYNVIASDGSYVNYR.H	YDL140C	1	RPB1	AALYKEVYNVIASDGSYVNYR	1350	//8	6//30	1.2695	1	R.K[2801.45]SETSGR.Y	YBR154C	1	RPB5	KSETSGR	201	808839	886227	881472	887005	0.993762	-0.00902752	-0.127228
						0	0.93144	JL102921_110821_RPB4_C2_D.21078.21078.5	P	16.9415	0.480739	0.33	1//17	33//170	16.1717	2.54762	R.AALYK[1170.64]EVYNVIASDGSYVNYR.H	YDL140C	1	RPB1	AALYKEVYNVIASDGSYVNYR	1350	//8	6//38	0.76975	1	R.K[2801.45]SETSGR.Y	YBR154C	1	RPB5	KSETSGR	201	652443	522884	713366	503645	1.41641	0.502236	0.384036
						0	-0.876177	JL102921_110821_RPB4_C2_100B.21575.21575.4	NP	16.8888	0.473804	2.14e-05	1//17	34//129	15.779	2.69048	R.AALYK[1170.64]EVYNVIASDGSYVNYR.H	YDL140C	1	RPB1	AALYKEVYNVIASDGSYVNYR	1350	//8	5//30	1.10975	0.928571	R.K[2801.45]SETSGR.Y	YBR154C	1	RPB5	KSETSGR	201	654245	513987	715461	493624	1.4494	0.53546	0.41726
						0	-2.1765	JL102921_110821_RPB4_C2_100B.21585.21585.5	P	16.64	0.456585	5.49e-06	2//17	36//170	15.9223	2.61905	R.AALYK[1170.64]EVYNVIASDGSYVNYR.H	YDL140C	1	RPB1	AALYKEVYNVIASDGSYVNYR	1350	//8	6//38	0.71775	1	R.K[2801.45]SETSGR.Y	YBR154C	1	RPB5	KSETSGR	201	391993	295496	428822	282006	1.52061	0.604652	0.486452
						0	3.67029	JL102921_110821_RPB4_C2_C18.20293.20293.4	NP	16.5768	0.470423	0.00765	1//17	35//129	15.4665	2.66667	R.AALYK[1170.64]EVYNVIASDGSYVNYR.H	YDL140C	1	RPB1	AALYKEVYNVIASDGSYVNYR	1350	//8	6//30	1.11025	1.21429	R.K[2801.45]SETSGR.Y	YBR154C	1	RPB5	KSETSGR	201	818663	646222	895226	621059	1.44145	0.527523	0.409323
						0	3.77801	JL102921_110821_RPB4_C2_70B.21344.21344.4	N	16.0587	0.436593		1//17	33//129	14.924	2.75	R.AALYK[1170.63]EVYNVIASDGSYVNYR.H	YDL140C	1	RPB1	AALYKEVYNVIASDGSYVNYR	1350	//8	6//30	1.13475	1	R.K[2801.43]SETSGR.Y	YBR154C	1	RPB5	KSETSGR	201	500515	427906	546926	415918	1.31498	0.395045	0.276845
						-2	2.0364	JL102921_110821_RPB4_C2_50B.24254.24254.4	NP	15.9938	0.460437	0.0623	//17	30//129	14.377	2.2381	R.AALYK[1170.64]EVYNVIASDGSYVNYR.H	YDL140C	1	RPB1	AALYKEVYNVIASDGSYVNYR	1350	//8	8//30	1.61675	1.57143	R.K[2801.45]SETSGR.Y	YBR154C	1	RPB5	KSETSGR	201	572320	631045	623666	632006	0.986803	-0.0191655	-0.137365
						0	0.478566	JL102921_110821_RPB4_C2_70B.21369.21369.5	N	15.9802	0.446519		1//17	35//170	15.0732	2.725	R.AALYK[1170.64]EVYNVIASDGSYVNYR.H	YDL140C	1	RPB1	AALYKEVYNVIASDGSYVNYR	1350	//8	7//38	0.907	1.5	R.K[2801.45]SETSGR.Y	YBR154C	1	RPB5	KSETSGR	201	297559	224682	325511	214481	1.51767	0.601862	0.483662
						-1	1.30439	JL102921_110821_RPB4_C2_100B.21580.21580.5	P	15.6273	0.437701	3.04e-06	2//17	37//170	14.9953	2.54762	R.AALYK[1170.64]EVYNVIASDGSYVNYR.H	YDL140C	1	RPB1	AALYKEVYNVIASDGSYVNYR	1350	//8	6//38	0.632	1	R.K[2801.45]SETSGR.Y	YBR154C	1	RPB5	KSETSGR	201	337929	251968	369713	240052	1.54014	0.623058	0.504858
						0	1.99702	JL102921_110821_RPB4_C2_C18.20314.20314.5	P	15.3185	0.460568	0.000433	1//17	30//170	14.523	2.33333	R.AALYK[1170.64]EVYNVIASDGSYVNYR.H	YDL140C	1	RPB1	AALYKEVYNVIASDGSYVNYR	1350	//8	6//38	0.7955	1.21429	R.K[2801.45]SETSGR.Y	YBR154C	1	RPB5	KSETSGR	201	816669	634322	893171	608152	1.46867	0.554506	0.436306
						-1	8.99818	JL102921_110821_RPB4_C2_C18.20684.20684.4	P	15.1493	0.386362	0.00183	2//17	34//129	14.261	2.38095	R.AALYK[1170.64]EVYNVIASDGSYVNYR.H	YDL140C	1	RPB1	AALYKEVYNVIASDGSYVNYR	1350	//8	6//30	0.88825	0.928571	R.K[2801.45]SETSGR.Y	YBR154C	1	RPB5	KSETSGR	201	579301	659975	631015	663144	0.95155	-0.0716484	-0.189848
						0	0.398651	JL102921_110821_RPB4_C2_D.21070.21070.5	P	14.968	0.427883	0.0957	1//17	34//170	14.0845	2.45238	R.AALYK[1170.64]EVYNVIASDGSYVNYR.H	YDL140C	1	RPB1	AALYKEVYNVIASDGSYVNYR	1350	//8	7//38	0.8835	1.5	R.K[2801.45]SETSGR.Y	YBR154C	1	RPB5	KSETSGR	201	525253	444705	574011	431674	1.32973	0.411135	0.292935
						0	1.82329	JL102921_110821_RPB4_C2_30B.19415.19415.4	NP	14.7127	0.435611	0.0757	//17	32//129	13.6122	2.59524	R.AALYK[1170.64]EVYNVIASDGSYVNYR.H	YDL140C	1	RPB1	AALYKEVYNVIASDGSYVNYR	1350	//8	5//30	1.1005	0.928571	R.K[2801.45]SETSGR.Y	YBR154C	1	RPB5	KSETSGR	201	363776	417296	396216	419583	0.944308	-0.0826704	-0.20087
						0	1.55303	JL102921_110821_RPB4_C2_30B.19440.19440.5	P	14.5442	0.415295	0.00156	//17	33//170	13.8003	2.45238	R.AALYK[1170.64]EVYNVIASDGSYVNYR.H	YDL140C	1	RPB1	AALYKEVYNVIASDGSYVNYR	1350	//8	6//38	0.744	1	R.K[2801.45]SETSGR.Y	YBR154C	1	RPB5	KSETSGR	201	498700	348582	545888	328590	1.66131	0.732317	0.614117
						0	2.61547	JL102921_110821_RPB4_C2_70B.21744.21744.4	N	14.3855	0.42301		1//17	33//129	13.4763	2.4	R.AALYK[1170.65]EVYNVIASDGSYVNYR.H	YDL140C	1	RPB1	AALYKEVYNVIASDGSYVNYR	1350	//8	6//30	0.90925	1.21429	R.K[2801.46]SETSGR.Y	YBR154C	1	RPB5	KSETSGR	201	423975	461949	462079	462089	0.999979	-2.99e-05	-0.11823
						0	1.02024	JL102921_110821_RPB4_C2_50B.23893.23893.5	P	14.2523	0.427527	0.67	1//17	30//170	13.5943	2.09524	R.AALYK[1170.64]EVYNVIASDGSYVNYR.H	YDL140C	1	RPB1	AALYKEVYNVIASDGSYVNYR	1350	//8	7//38	0.658	1.07143	R.K[2801.45]SETSGR.Y	YBR154C	1	RPB5	KSETSGR	201	399203	442208	434993	443090	0.981725	-0.0266086	-0.144809
						0	1.19783	JL102921_110821_RPB4_C2_C18.20496.20496.5	P	14.141	0.393587	0.00507	//17	33//170	13.3865	2.45238	R.AALYK[1170.64]EVYNVIASDGSYVNYR.H	YDL140C	1	RPB1	AALYKEVYNVIASDGSYVNYR	1350	//8	6//38	0.7545	1	R.K[2801.45]SETSGR.Y	YBR154C	1	RPB5	KSETSGR	201	332850	297430	363557	290789	1.25024	0.322209	0.204009
						0	1.82329	JL102921_110821_RPB4_C2_30B.19412.19412.4	NP	13.894	0.396898	0.00516	1//17	29//129	12.7562	2.16667	R.AALYK[1170.64]EVYNVIASDGSYVNYR.H	YDL140C	1	RPB1	AALYKEVYNVIASDGSYVNYR	1350	//8	5//30	1.13775	0.928571	R.K[2801.45]SETSGR.Y	YBR154C	1	RPB5	KSETSGR	201	315971	372594	344024	375629	0.915862	-0.126798	-0.244998
						-1	3.96834	JL102921_110821_RPB4_C2_30B.19582.19582.5	P	13.735	0.392395	0.00501	1//17	30//170	12.9217	2.16667	R.AALYK[1170.64]EVYNVIASDGSYVNYR.H	YDL140C	1	RPB1	AALYKEVYNVIASDGSYVNYR	1350	//8	7//38	0.81325	1.28571	R.K[2801.45]SETSGR.Y	YBR154C	1	RPB5	KSETSGR	201	338494	296526	369794	289157	1.27887	0.354868	0.236668
						-2	-3.93084	JL102921_110821_RPB4_C2_50B.24267.24267.4	NP	13.5137	0.412445	0.474	//17	28//129	12.1783	2.02381	R.AALYK[1170.64]EVYNVIASDGSYVNYR.H	YDL140C	1	RPB1	AALYKEVYNVIASDGSYVNYR	1350	//8	6//30	1.3355	1.42857	R.K[2801.45]SETSGR.Y	YBR154C	1	RPB5	KSETSGR	201	693672	783376	755680	786458	0.960865	-0.0575948	-0.175795
						-1	1.74838	JL102921_110821_RPB4_C2_100B.21551.21551.5	P	13.1717	0.366258	8.51e-07	2//17	35//170	12.5605	2.57143	R.AALYK[1170.64]EVYNVIASDGSYVNYR.H	YDL140C	1	RPB1	AALYKEVYNVIASDGSYVNYR	1350	//8	6//38	0.61125	1	R.K[2801.45]SETSGR.Y	YBR154C	1	RPB5	KSETSGR	201	244667	215518	267277	210315	1.27084	0.345784	0.227584
						-2	2.81783	JL102921_110821_RPB4_C2_C18.20672.20672.4	NP	12.6583	0.309913	0.00061	1//17	26//129	11.1683	1.85714	R.AALYK[1170.64]EVYNVIASDGSYVNYR.H	YDL140C	1	RPB1	AALYKEVYNVIASDGSYVNYR	1350	//8	6//30	1.49	1.42857	R.K[2801.45]SETSGR.Y	YBR154C	1	RPB5	KSETSGR	201	563229	670230	613161	676268	0.906683	-0.14133	-0.25953
						-1	0.594007	JL102921_110821_RPB4_C2_100B.21970.21970.5	P	12.164	0.376391	0.00322	//17	26//170	11.3315	1.90476	R.AALYK[1170.64]EVYNVIASDGSYVNYR.H	YDL140C	1	RPB1	AALYKEVYNVIASDGSYVNYR	1350	//8	7//38	0.8325	1.07143	R.K[2801.45]SETSGR.Y	YBR154C	1	RPB5	KSETSGR	201	287859	300854	313885	299626	1.04759	0.0670741	-0.0511259
						0	-1.08929	JL102921_110821_RPB4_C2_30B.19739.19739.4	P	11.5723	0.332116	0.0142	//17	29//129	11.271	2.11905	R.AALYK[1170.64]EVYNVIASDGSYVNYR.H	YDL140C	1	RPB1	AALYKEVYNVIASDGSYVNYR	1350	1//8	4//30	0.30125	0.285714	R.K[2801.45]SETSGR.Y	YBR154C	1	RPB5	KSETSGR	201	392808	418001	428232	417097	1.0267	0.0380122	-0.0801878
						0	0.576983	JL102921_110821_RPB4_C2_50B.23883.23883.3	N	9.42275	0.279532		//17	22//88	7.71575	1.525	R.AALYK[1170.65]EVYNVIASDGSYVNYR.H	YDL140C	1	RPB1	AALYKEVYNVIASDGSYVNYR	1350	//8	5//22	1.707	1.14286	R.K[2801.45]SETSGR.Y	YBR154C	1	RPB5	KSETSGR	201	568665	398793	622457	376131	1.6549	0.72674	0.60854
						0	3.54984	JL102921_110821_RPB4_C2_C18.20298.20298.3	NP	9.273	0.341994	0.389	//17	21//88	7.498	1.33333	R.AALYK[1170.64]EVYNVIASDGSYVNYR.H	YDL140C	1	RPB1	AALYKEVYNVIASDGSYVNYR	1350	//8	6//22	1.775	1.21429	R.K[2801.45]SETSGR.Y	YBR154C	1	RPB5	KSETSGR	201	462204	284834	506403	262347	1.93028	0.948807	0.830607
						-1	6.17945	JL102921_110821_RPB4_C2_D.19857.19857.4	N	8.88025	0.263521		//17	29//129	7.88875	1.875	R.AALYK[1170.66]EVYNVIASDGSYVNYR.H	YDL140C	1	RPB1	AALYKEVYNVIASDGSYVNYR	1350	//8	4//30	0.9915	0.857143	R.K[2801.47]SETSGR.Y	YBR154C	1	RPB5	KSETSGR	201	782912	847083	853347	846725	1.00782	0.0112389	-0.106961
						0	6.52573	JL102921_110821_RPB4_C2_30B.19705.19705.5	P	8.4765	0.261552	0.0047	//17	24//170	8.0195	1.5	R.AALYK[1170.64]EVYNVIASDGSYVNYR.H	YDL140C	1	RPB1	AALYKEVYNVIASDGSYVNYR	1350	//8	5//38	0.457	0.714286	R.K[2801.45]SETSGR.Y	YBR154C	1	RPB5	KSETSGR	201	234830	237397	256160	235563	1.08744	0.12093	0.00273045
						0	0.27548	JL102921_110821_RPB4_C2_50B.24142.24142.3	N	8.301	0.292397		//17	23//88	7.37575	1.45	R.AALYK[1170.64]EVYNVIASDGSYVNYR.H	YDL140C	1	RPB1	AALYKEVYNVIASDGSYVNYR	1350	//8	4//22	0.92525	0.642857	R.K[2801.45]SETSGR.Y	YBR154C	1	RPB5	KSETSGR	201	599119	504484	654767	489335	1.33807	0.420159	0.301959
						0	0.576983	JL102921_110821_RPB4_C2_50B.23886.23886.3	N	8.2605	0.281645		//17	18//88	7.015	1.175	R.AALYK[1170.65]EVYNVIASDGSYVNYR.H	YDL140C	1	RPB1	AALYKEVYNVIASDGSYVNYR	1350	//8	4//22	1.2455	0.857143	R.K[2801.45]SETSGR.Y	YBR154C	1	RPB5	KSETSGR	201	600563	410599	657501	385572	1.70526	0.76999	0.65179
						0	0.914827	JL102921_110821_RPB4_C2_D.21063.21063.3	N	7.87575	0.307917		//17	19//88	6.5575	1.075	R.AALYK[1170.64]EVYNVIASDGSYVNYR.H	YDL140C	1	RPB1	AALYKEVYNVIASDGSYVNYR	1350	//8	6//22	1.31825	1	R.K[2801.44]SETSGR.Y	YBR154C	1	RPB5	KSETSGR	201	694201	505364	759643	479617	1.58385	0.663439	0.545239
						0	1.85567	JL102921_110821_RPB4_C2_70B.21625.21625.3	N	6.46275	0.213977		//17	18//88	4.85975	0.975	R.AALYK[1170.65]EVYNVIASDGSYVNYR.H	YDL140C	1	RPB1	AALYKEVYNVIASDGSYVNYR	1350	//8	7//22	1.603	1.28571	R.K[2801.45]SETSGR.Y	YBR154C	1	RPB5	KSETSGR	201	427819	342189	467776	329503	1.41964	0.505525	0.387325
						-1	5.01972	JL102921_110821_RPB4_C2_50B.24212.24212.3	N	5.509	0.152593		//17	16//88	4.2055	0.775	R.AALYK[1170.63]EVYNVIASDGSYVNYR.H	YDL140C	1	RPB1	AALYKEVYNVIASDGSYVNYR	1350	//8	5//22	1.3035	1.14286	R.K[2801.43]SETSGR.Y	YBR154C	1	RPB5	KSETSGR	201	391864	317491	428413	306292	1.39871	0.484094	0.365894
						856	-119.88	JL102921_110821_RPB4_C2_C18.20568.20568.3	P	4.35375	0.134087	0.608	1//17	18//88	3.8585	1.16667	R.AALYK[1170.64]EVYNVIASDGSYVNYR.H	YDL140C	1	RPB1	AALYKEVYNVIASDGSYVNYR	1350	//8	4//22	0.49525	0.642857	R.K[2801.45]SETSGR.Y	YBR154C	1	RPB5	KSETSGR	201	959870	1.40496e+06	1.04177e+06	1.44244e+06	0.722228	-0.469474	-0.587674
	18	RPB1:403---RPB5:171	4.084	-0.213726	0.213726
						0	1.48224	JL102921_110821_RPB4_C2_50B.10917.10917.5	N	4.084	0.154413		//16	13//95	2.2185	0.730769	R.NGPNEHPGAK[1376.83]YVIR.D	YDL140C	1	RPB1	NGPNEHPGAKYVIR	403	//8	9//40	1.8655	1.35714	R.LK[1958.06]ESQLPR.I	YBR154C	1	RPB5	LKESQLPR	171	919876	1145491	1.00081e+06	1.16062e+06	0.862307	-0.213726	-0.331926
5	RPB1---RPB6
	1	RPB1:1003---RPB6:67	7.02375	0.277597	-0.277597
						0	3.03602	JL102921_110821_RPB4_C2_C18.05781.05781.4	P	7.02375	0.305467	0.453	//11	16//58	6.9145	2.36364	R.GK[1051.69]NEIIQNAQR.D	YDL140C	1	RPB1	GKNEIIQNAQR	1003	//5	4//21	0.10925	0.6	R.RK[1676.94]TLK.E	YPR187W	1	RPB6	RKTLK	67	259792	218787	283922	212221	1.33786	0.419925	0.301725
						-1	6.15279	JL102921_110821_RPB4_C2_30B.06271.06271.4	P	6.961	0.304726	0.263	//11	17//58	6.86925	2.40909	R.GK[1051.69]NEIIQNAQR.D	YDL140C	1	RPB1	GKNEIIQNAQR	1003	//5	3//21	0.09175	0.5	R.RK[1676.94]TLK.E	YPR187W	1	RPB6	RKTLK	67	564688	565833	616039	560904	1.0983	0.135269	0.0170688
	2	RPB1:1003---RPB6:76	8.81775	0.973654	-0.973654
						0	4.84139	JL102921_110821_RPB4_C2_30B.07422.07422.4	NP	8.81775	0.321663	0.0214	//11	19//57	7.911	2.72727	R.GK[1233.73]NEIIQNAQR.D	YDL140C	1	RPB1	GKNEIIQNAQR	1003	//9	5//28	0.90675	0.714286	K.AIPK[1676.94]DQR.A	YPR187W	1	RPB6	AIPKDQR	76	1.22739e+06	802152	1.34421e+06	747175	1.79905	0.847239	0.729039
						-1	2.9913	JL102921_110821_RPB4_C2_C18.06463.06463.4	P	8.691	0.283552	0.379	//11	18//57	7.91125	2.45455	R.GK[1233.73]NEIIQNAQR.D	YDL140C	1	RPB1	GKNEIIQNAQR	1003	//9	5//28	0.77975	0.714286	K.AIPK[1676.94]DQR.A	YPR187W	1	RPB6	AIPKDQR	76	777628	607826	850427	583303	1.45795	0.543942	0.425742
						0	3.49393	JL102921_110821_RPB4_C2_C18.06091.06091.4	NP	8.08975	0.295516	0.182	//11	16//55	7.14175	2.22727	R.GK[1490.87]NEIIQNAQR.D	YDL140C	1	RPB1	GKNEIIQNAQR	1003	//11	7//39	0.948	0.944444	K.EKAIPK[1676.94]DQR.A	YPR187W	1	RPB6	EKAIPKDQR	76	302003	223075	330434	212207	1.55713	0.638889	0.520689
						0	3.13228	JL102921_110821_RPB4_C2_50B.09360.09360.3	N	6.81575	0.285243		//11	17//45	5.084	2.7	R.GK[1233.72]NEIIQNAQR.D	YDL140C	1	RPB1	GKNEIIQNAQR	1003	1//9	8//21	1.73175	1.25	K.AIPK[1676.93]DQR.A	YPR187W	1	RPB6	AIPKDQR	76	406642	211096	446008	187226	2.3822	1.25229	1.13409
						0	1.55794	JL102921_110821_RPB4_C2_30B.07392.07392.3	NP	6.70675	0.271996	0.71	//11	16//45	5.21375	2.40909	R.GK[1233.73]NEIIQNAQR.D	YDL140C	1	RPB1	GKNEIIQNAQR	1003	1//9	7//21	1.493	1	K.AIPK[1676.94]DQR.A	YPR187W	1	RPB6	AIPKDQR	76	298449	135858	327573	116364	2.81506	1.49317	1.37497
						0	5.96396	JL102921_110821_RPB4_C2_C18.06481.06481.3	N	5.65575	0.218757		//11	18//45	4.7005	3	R.GK[1233.74]NEIIQNAQR.D	YDL140C	1	RPB1	GKNEIIQNAQR	1003	1//9	5//21	0.95525	0.75	K.AIPK[1676.95]DQR.A	YPR187W	1	RPB6	AIPKDQR	76	829187	292912	911131	230004	3.96138	1.986	1.8678
						0	2.02212	JL102921_110821_RPB4_C2_30B.07457.07457.5	NP	5.10875	0.200335	0.562	//11	14//69	4.103	1.72727	R.GK[1233.73]NEIIQNAQR.D	YDL140C	1	RPB1	GKNEIIQNAQR	1003	//9	5//35	1.00575	0.714286	K.AIPK[1676.94]DQR.A	YPR187W	1	RPB6	AIPKDQR	76	963367	951121	1.05115e+06	941242	1.11676	0.159325	0.0411249
						0	1.95788	JL102921_110821_RPB4_C2_C18.06527.06527.5	P	4.84025	0.170627	0.16	//11	14//69	4.02725	1.86364	R.GK[1233.73]NEIIQNAQR.D	YDL140C	1	RPB1	GKNEIIQNAQR	1003	//9	5//35	0.813	0.714286	K.AIPK[1676.94]DQR.A	YPR187W	1	RPB6	AIPKDQR	76	3.19556e+06	1.77436e+06	3.50351e+06	1.59872e+06	2.19144	1.13188	1.01368
						0	2.40756	JL102921_110821_RPB4_C2_30B.07449.07449.5	P	4.78975	0.184359	0.708	//11	14//69	4.2515	1.72727	R.GK[1233.73]NEIIQNAQR.D	YDL140C	1	RPB1	GKNEIIQNAQR	1003	//9	5//35	0.53825	0.5	K.AIPK[1676.94]DQR.A	YPR187W	1	RPB6	AIPKDQR	76	822951	792386	898180	781866	1.14876	0.200083	0.0818833
						-2	0.402206	JL102921_110821_RPB4_C2_30B.07570.07570.3	N	4.4135	0.167712		//11	14//45	3.2945	2.2	R.GK[1233.73]NEIIQNAQR.D	YDL140C	1	RPB1	GKNEIIQNAQR	1003	2//9	7//21	1.119	1.08333	K.AIPK[1676.94]DQR.A	YPR187W	1	RPB6	AIPKDQR	76	856760	525382	938721	483430	1.94179	0.957388	0.839188
						-1	2.0261	JL102921_110821_RPB4_C2_50B.09392.09392.3	N	3.77525	0.158838		//11	14//45	2.655	2.2	R.GK[1233.73]NEIIQNAQR.D	YDL140C	1	RPB1	GKNEIIQNAQR	1003	1//9	6//21	1.12025	0.916667	K.AIPK[1676.95]DQR.A	YPR187W	1	RPB6	AIPKDQR	76	502269	227806	551293	194914	2.82839	1.49998	1.38178
	3	RPB1:1003---RPB6:128	7.9195	0.732545	-0.732545
						0	3.42467	JL102921_110821_RPB4_C2_C18.06603.06603.4	P	7.9195	0.275648	0.000684	//11	21//58	7.1595	2.59091	R.GK[1123.67]NEIIQNAQR.D	YDL140C	1	RPB1	GKNEIIQNAQR	1003	//8	7//25	0.76	1.25	K.ELAEK[1676.94]K.I	YPR187W	1	RPB6	ELAEKK	128	1.99488e+06	1.34246e+06	2.18427e+06	1.25711e+06	1.73753	0.797039	0.678839
						0	1.48588	JL102921_110821_RPB4_C2_50B.09539.09539.3	N	7.21	0.256698		//11	15//47	4.68175	2.25	R.GK[1123.66]NEIIQNAQR.D	YDL140C	1	RPB1	GKNEIIQNAQR	1003	//8	8//19	2.52825	1.8	K.ELAEK[1676.94]K.I	YPR187W	1	RPB6	ELAEKK	128	324442	211137	355331	196512	1.80819	0.854548	0.736348
						-2	6.98804	JL102921_110821_RPB4_C2_50B.09530.09530.3	N	6.987	0.252617		//11	13//47	4.19875	1.9	R.GK[1123.65]NEIIQNAQR.D	YDL140C	1	RPB1	GKNEIIQNAQR	1003	//8	8//19	2.78825	1.8	K.ELAEK[1676.92]K.I	YPR187W	1	RPB6	ELAEKK	128	346171	234709	379014	220080	1.72216	0.784222	0.666022
						0	3.1072	JL102921_110821_RPB4_C2_C18.06597.06597.3	NP	6.8805	0.222526	0.00175	//11	14//47	4.3965	1.86364	R.GK[1123.67]NEIIQNAQR.D	YDL140C	1	RPB1	GKNEIIQNAQR	1003	//8	7//19	2.484	1.41667	K.ELAEK[1676.94]K.I	YPR187W	1	RPB6	ELAEKK	128	776364	460074	850828	420403	2.02384	1.0171	0.898896
						0	7.52017	JL102921_110821_RPB4_C2_30B.07583.07583.4	P	6.717	0.243816	0.000527	//11	18//58	6.21725	2.18182	R.GK[1123.67]NEIIQNAQR.D	YDL140C	1	RPB1	GKNEIIQNAQR	1003	//8	6//25	0.49975	0.916667	K.ELAEK[1676.94]K.I	YPR187W	1	RPB6	ELAEKK	128	1970550	1.82487e+06	2.15157e+06	1.79218e+06	1.20053	0.263668	0.145468
						0	4.80468	JL102921_110821_RPB4_C2_30B.07579.07579.3	NP	6.542	0.215013	0.00153	//11	13//47	3.92575	1.72727	R.GK[1123.67]NEIIQNAQR.D	YDL140C	1	RPB1	GKNEIIQNAQR	1003	//8	7//19	2.61625	1.41667	K.ELAEK[1676.94]K.I	YPR187W	1	RPB6	ELAEKK	128	981728	677465	1.07473e+06	637203	1.68663	0.754146	0.635946
						0	1.48588	JL102921_110821_RPB4_C2_70B.07515.07515.3	N	5.5785	0.233234		//11	11//47	3.367	1.7	R.GK[1123.66]NEIIQNAQR.D	YDL140C	1	RPB1	GKNEIIQNAQR	1003	//8	7//19	2.2115	1.4	K.ELAEK[1676.94]K.I	YPR187W	1	RPB6	ELAEKK	128	106123	77545.9	116123	73640	1.5769	0.657095	0.538895
	4	RPB1:728---RPB6:67	0.516	0.481866	-0.481866
						1	-0.1381	JL102921_110821_RPB4_C2_30B.06515.06515.4	P	0.516	0.0205533	0.68	//7	4//32	0.2805	0.666667	R.K[952.55]TLK[425.27]EK.A	YPR187W	1	RPB6	KTLKEK	67	//5	2//22	0.2355	0.4	R.DK[1449.91]AGR.L	YDL140C	1	RPB1	DKAGR	728	1.10334e+06	895137	1.20624e+06	863727	1.39655	0.481866	0.363666
	5	RPB1:15---RPB6:67	16.2375	0.629146	-0.629146
						0	-0.387629	JL102921_110821_RPB4_C2_70B.14374.14374.4	P	16.2375	0.51006	0.0769	//18	31//98	16.2112	3.28125	R.TVK[1051.69]EVQFGLFSPEEVR.A	YDL140C	1	RPB1	TVKEVQFGLFSPEEVR	15	//5	1//19	0.02625	0.1	R.RK[2271.23]TLK.E	YPR187W	1	RPB6	RKTLK	67	1.25543e+06	745207	1.37582e+06	681185	2.01975	1.01418	0.895977
						0	3.03612	JL102921_110821_RPB4_C2_C18.15796.15796.4	P	9.8775	0.316272	0.0144	//18	25//98	9.6775	2.53125	R.TVK[895.59]EVQFGLFSPEEVR.A	YDL140C	1	RPB1	TVKEVQFGLFSPEEVR	15	//5	2//18	0.2	0.5	R.K[2271.23]TLK.E	YPR187W	1	RPB6	KTLK	67	740873	529294	810837	500777	1.61916	0.695244	0.577044
						0	-1.60274	JL102921_110821_RPB4_C2_30B.14368.14368.4	P	9.60475	0.332287	0.000784	//18	29//98	9.33875	2.71875	R.TVK[895.59]EVQFGLFSPEEVR.A	YDL140C	1	RPB1	TVKEVQFGLFSPEEVR	15	//5	3//18	0.266	1	R.K[2271.23]TLK.E	YPR187W	1	RPB6	KTLK	67	520468	507978	567963	502032	1.13133	0.178017	0.0598174
	6	RPB1:15---RPB6:76	12.1662	1.1418	-1.1418
						0	6.72594	JL102921_110821_RPB4_C2_D.15814.15814.5	N	12.1662	0.386672		//18	25//118	11.2423	2.6	R.TVK[1788.07]EVQFGLFSPEEVR.A	YDL140C	1	RPB1	TVKEVQFGLFSPEEVR	15	//9	5//54	0.924	0.75	K.EK[2271.26]AIPK[425.27]DQR.A	YPR187W	1	RPB6	EKAIPKDQR	76	1.62987e+06	966009	1.78619e+06	882740	2.02347	1.01683	0.898628
						-1	0.486637	JL102921_110821_RPB4_C2_D.15851.15851.6	N	7.77025	0.258866		//18	15//92	6.84725	1.43333	R.TVK[1788.04]EVQFGLFSPEEVR.A	YDL140C	1	RPB1	TVKEVQFGLFSPEEVR	15	//9	5//44	0.923	0.625	K.EK[2271.23]AIPK[425.27]DQR.A	YPR187W	1	RPB6	EKAIPKDQR	76	934893	380318	1.02667e+06	314571	3.26373	1.70652	1.58832
						-1	2.04893	JL102921_110821_RPB4_C2_70B.16400.16400.4	N	6.06525	0.23111		1//18	19//92	5.0085	1.7	R.TVK[1788.05]EVQFGLFSPEEVR.A	YDL140C	1	RPB1	TVKEVQFGLFSPEEVR	15	//9	5//44	1.05675	0.5625	K.EK[2271.24]AIPK[425.27]DQR.A	YPR187W	1	RPB6	EKAIPKDQR	76	744500	370117	816773	324719	2.51532	1.33074	1.21254
						1762	17.7666	JL102921_110821_RPB4_C2_30B.14801.14801.3	P	3.4185	0.128998	0.474	//18	6//66	2.382	0.53125	R.TVK[1788.04]EVQFGLFSPEEVR.A	YDL140C	1	RPB1	TVKEVQFGLFSPEEVR	15	//11	5//32	1.0365	0.666667	K.EK[425.27]AIPK[2271.23]DQR.A	YPR187W	1	RPB6	EKAIPKDQR	76	527653	420121	576956	404276	1.42713	0.513121	0.394921
	7	RPB1:15---RPB6:70	10.4817	0.52137	-0.52137
						0	4.81954	JL102921_110821_RPB4_C2_C18.17017.17017.5	P	10.4817	0.381161	0.315	//18	24//118	10.129	2.21875	R.TVK[1731.08]EVQFGLFSPEEVR.A	YDL140C	1	RPB1	TVKEVQFGLFSPEEVR	15	//11	4//56	0.35275	0.333333	K.TLK[2271.23]EK[425.27]AIPK.D	YPR187W	1	RPB6	TLKEKAIPK	70	1.37095e+06	702624	1.50378e+06	621208	2.42073	1.27544	1.15724
						0	6.21413	JL102921_110821_RPB4_C2_30B.14332.14332.4	P	9.32775	0.273766	0.435	//18	23//98	9.19725	2.0625	R.TVK[1024.64]EVQFGLFSPEEVR.A	YDL140C	1	RPB1	TVKEVQFGLFSPEEVR	15	//7	3//19	0.1305	0.3	K.TLK[2271.23]EK.A	YPR187W	1	RPB6	TLKEK	70	529535	532882	577662	528495	1.09303	0.128335	0.0101353
						-1	-3.86806	JL102921_110821_RPB4_C2_30B.14347.14347.4	P	8.65875	0.2544	0.488	//18	21//98	8.548	1.875	R.TVK[1024.64]EVQFGLFSPEEVR.A	YDL140C	1	RPB1	TVKEVQFGLFSPEEVR	15	//7	2//19	0.11075	0.2	K.TLK[2271.23]EK.A	YPR187W	1	RPB6	TLKEK	70	548750	541440	598754	535778	1.11754	0.160331	0.0421306
	8	RPB1:15---RPB6:72	14.8805	1.03675	-1.03675
						0	0.661385	JL102921_110821_RPB4_C2_D.16301.16301.4	N	14.8805	0.555077		//18	31//98	13.9083	3.33333	R.TVK[1091.68]EVQFGLFSPEEVR.A	YDL140C	1	RPB1	TVKEVQFGLFSPEEVR	15	1//6	5//23	0.97225	1	K.EK[2271.24]AIPK.D	YPR187W	1	RPB6	EKAIPK	72	1.21764e+06	936594	1.33182e+06	896625	1.48537	0.570824	0.452624
						0	-3.41784	JL102921_110821_RPB4_C2_70B.16912.16912.4	P	14.4848	0.503905	0.355	//18	31//98	13.598	3.1875	R.TVK[1091.68]EVQFGLFSPEEVR.A	YDL140C	1	RPB1	TVKEVQFGLFSPEEVR	15	2//6	5//23	0.88675	0.833333	K.EK[2271.23]AIPK.D	YPR187W	1	RPB6	EKAIPK	72	1.38191e+06	886442	1.51363e+06	822816	1.83958	0.879375	0.761175
						0	2.79236	JL102921_110821_RPB4_C2_50B.19910.19910.4	N	14.3942	0.523904		//18	33//98	13.4335	3.53333	R.TVK[1091.67]EVQFGLFSPEEVR.A	YDL140C	1	RPB1	TVKEVQFGLFSPEEVR	15	1//6	5//23	0.96075	1	K.EK[2271.23]AIPK.D	YPR187W	1	RPB6	EKAIPK	72	1.84578e+06	1.19673e+06	2.02157e+06	1.11306e+06	1.81622	0.86094	0.74274
						0	-0.568506	JL102921_110821_RPB4_C2_30B.15114.15114.4	P	12.5297	0.453426	0.00102	//18	27//98	11.6625	2.71875	R.TVK[1091.68]EVQFGLFSPEEVR.A	YDL140C	1	RPB1	TVKEVQFGLFSPEEVR	15	1//6	4//23	0.86725	0.75	K.EK[2271.23]AIPK.D	YPR187W	1	RPB6	EKAIPK	72	1.05068e+06	673695	1.15083e+06	625291	1.84048	0.880081	0.761881
						0	3.92135	JL102921_110821_RPB4_C2_C18.16326.16326.4	P	12.4093	0.421016	0.000255	//18	28//98	12.0655	2.84375	R.TVK[1091.68]EVQFGLFSPEEVR.A	YDL140C	1	RPB1	TVKEVQFGLFSPEEVR	15	1//6	3//23	0.34375	0.416667	K.EK[2271.23]AIPK.D	YPR187W	1	RPB6	EKAIPK	72	1.81907e+06	791794	1.99703e+06	669226	2.98409	1.57729	1.45909
						0	-0.896991	JL102921_110821_RPB4_C2_100B.17142.17142.5	NP	10.6875	0.415339	5.62e-08	//18	25//124	9.71	2.15625	R.TVK[1091.68]EVQFGLFSPEEVR.A	YDL140C	1	RPB1	TVKEVQFGLFSPEEVR	15	2//6	7//29	0.9775	1.25	K.EK[2271.23]AIPK.D	YPR187W	1	RPB6	EKAIPK	72	771800	297124	847775	241104	3.51622	1.81403	1.69583
						0	4.11535	JL102921_110821_RPB4_C2_30B.15986.15986.5	P	10.4437	0.362592	0.0241	//18	23//118	10.2523	2.125	R.TVK[1731.08]EVQFGLFSPEEVR.A	YDL140C	1	RPB1	TVKEVQFGLFSPEEVR	15	//11	3//54	0.1915	0.166667	K.TLK[425.27]EK[2271.23]AIPK.D	YPR187W	1	RPB6	TLKEKAIPK	72	1.23856e+06	715952	1.35758e+06	650799	2.08602	1.06075	0.942555
						0	-2.30007	JL102921_110821_RPB4_C2_50B.19916.19916.5	P	10.222	0.395275	0.604	//18	23//124	9.42075	2.1875	R.TVK[1091.68]EVQFGLFSPEEVR.A	YDL140C	1	RPB1	TVKEVQFGLFSPEEVR	15	1//6	4//29	0.80125	0.75	K.EK[2271.23]AIPK.D	YPR187W	1	RPB6	EKAIPK	72	1.28377e+06	789006	1.40656e+06	726331	1.93652	0.95347	0.83527
						0	-2.30007	JL102921_110821_RPB4_C2_30B.15126.15126.5	P	9.68175	0.385597	0.00185	//18	22//124	8.87525	2.0625	R.TVK[1091.68]EVQFGLFSPEEVR.A	YDL140C	1	RPB1	TVKEVQFGLFSPEEVR	15	2//6	5//29	0.8065	0.833333	K.EK[2271.23]AIPK.D	YPR187W	1	RPB6	EKAIPK	72	925500	476528	1.01514e+06	421793	2.40673	1.26708	1.14888
						0	0.0246637	JL102921_110821_RPB4_C2_D.16310.16310.3	N	9.50975	0.340882		//18	17//72	7.59075	1.8	R.TVK[1091.68]EVQFGLFSPEEVR.A	YDL140C	1	RPB1	TVKEVQFGLFSPEEVR	15	//6	6//17	1.919	1.6	K.EK[2271.23]AIPK.D	YPR187W	1	RPB6	EKAIPK	72	1.24894e+06	792628	1.3681e+06	734242	1.86328	0.897843	0.779643
						0	2.23295	JL102921_110821_RPB4_C2_C18.16343.16343.5	P	9.4695	0.385307	0.00634	//18	22//124	8.61025	2.0625	R.TVK[1091.68]EVQFGLFSPEEVR.A	YDL140C	1	RPB1	TVKEVQFGLFSPEEVR	15	2//6	6//29	0.85925	1.16667	K.EK[2271.23]AIPK.D	YPR187W	1	RPB6	EKAIPK	72	1.40029e+06	363760	1.54026e+06	243979	6.3131	2.65835	2.54015
						0	11.1254	JL102921_110821_RPB4_C2_30B.14751.14751.5	P	8.63425	0.275767	0.261	//18	21//118	8.04525	1.90625	R.TVK[1788.04]EVQFGLFSPEEVR.A	YDL140C	1	RPB1	TVKEVQFGLFSPEEVR	15	//9	4//54	0.589	0.333333	K.EK[2271.23]AIPK[425.27]DQR.A	YPR187W	1	RPB6	EKAIPKDQR	72	662998	469168	725662	443183	1.63739	0.711398	0.593198
						-1	-1.63091	JL102921_110821_RPB4_C2_30B.15308.15308.5	P	8.447	0.346857	0.0178	//18	20//124	7.636	1.71875	R.TVK[1091.68]EVQFGLFSPEEVR.A	YDL140C	1	RPB1	TVKEVQFGLFSPEEVR	15	2//6	5//29	0.811	0.833333	K.EK[2271.23]AIPK.D	YPR187W	1	RPB6	EKAIPK	72	403283	328656	440873	317328	1.38933	0.474389	0.356189
						0	1.25283	JL102921_110821_RPB4_C2_30B.14500.14500.5	P	8.33275	0.281141	0.219	//18	20//118	7.6625	1.875	R.TVK[1788.04]EVQFGLFSPEEVR.A	YDL140C	1	RPB1	TVKEVQFGLFSPEEVR	15	//9	5//54	0.67025	0.388889	K.EK[2271.23]AIPK[425.27]DQR.A	YPR187W	1	RPB6	EKAIPKDQR	72	1.29291e+06	896010	1.41534e+06	843381	1.67817	0.746888	0.628688
						0	-2.73459	JL102921_110821_RPB4_C2_100B.16543.16543.6	P	8.29675	0.290675	0.000405	//18	20//118	7.74	1.71875	R.TVK[1788.04]EVQFGLFSPEEVR.A	YDL140C	1	RPB1	TVKEVQFGLFSPEEVR	15	//9	6//54	0.55675	0.444444	K.EK[2271.23]AIPK[425.27]DQR.A	YPR187W	1	RPB6	EKAIPKDQR	72	529175	343035	579572	319043	1.8166	0.861239	0.743039
						0	3.05906	JL102921_110821_RPB4_C2_30B.15964.15964.5	P	8.26075	0.29295	0.0538	//18	25//118	7.43725	2.15625	R.TVK[1731.08]EVQFGLFSPEEVR.A	YDL140C	1	RPB1	TVKEVQFGLFSPEEVR	15	//11	5//54	0.8235	0.555556	K.TLK[425.27]EK[2271.23]AIPK.D	YPR187W	1	RPB6	TLKEKAIPK	72	888821	609708	973063	572879	1.69855	0.764303	0.646103
						-2	5.44056	JL102921_110821_RPB4_C2_30B.14589.14589.6	NP	8.1545	0.282897	0.128	//18	17//118	6.851	1.46875	R.TVK[1788.04]EVQFGLFSPEEVR.A	YDL140C	1	RPB1	TVKEVQFGLFSPEEVR	15	1//9	9//54	1.3035	1.05556	K.EK[2271.23]AIPK[425.27]DQR.A	YPR187W	1	RPB6	EKAIPKDQR	72	930952	414649	1.02191e+06	352898	2.89576	1.53394	1.41574
						0	7.14233	JL102921_110821_RPB4_C2_C18.16328.16328.3	NP	8.0595	0.238073	0.047	//18	19//72	6.193	1.78125	R.TVK[1091.68]EVQFGLFSPEEVR.A	YDL140C	1	RPB1	TVKEVQFGLFSPEEVR	15	//6	7//17	1.8665	1.66667	K.EK[2271.23]AIPK.D	YPR187W	1	RPB6	EKAIPK	72	1.31203e+06	384436	1.44265e+06	276716	5.21346	2.38224	2.26404
						0	1.73403	JL102921_110821_RPB4_C2_100B.16567.16567.6	P	8.00525	0.279909	0.145	//18	19//118	7.525	1.59375	R.TVK[1788.04]EVQFGLFSPEEVR.A	YDL140C	1	RPB1	TVKEVQFGLFSPEEVR	15	1//9	5//54	0.48025	0.388889	K.EK[2271.23]AIPK[425.27]DQR.A	YPR187W	1	RPB6	EKAIPKDQR	72	840326	404069	922067	351412	2.62389	1.39171	1.27351
						0	10.7752	JL102921_110821_RPB4_C2_30B.14548.14548.6	NP	7.9055	0.299462	0.177	//18	17//118	6.87075	1.46875	R.TVK[1788.04]EVQFGLFSPEEVR.A	YDL140C	1	RPB1	TVKEVQFGLFSPEEVR	15	1//9	6//54	1.03475	0.722222	K.EK[2271.23]AIPK[425.27]DQR.A	YPR187W	1	RPB6	EKAIPKDQR	72	983548	421672	1.07984e+06	354734	3.04409	1.60601	1.48781
						0	1.4	JL102921_110821_RPB4_C2_50B.19896.19896.3	N	7.69225	0.260803		//18	17//72	5.90225	1.66667	R.TVK[1091.68]EVQFGLFSPEEVR.A	YDL140C	1	RPB1	TVKEVQFGLFSPEEVR	15	//6	6//17	1.79	1.6	K.EK[2271.24]AIPK.D	YPR187W	1	RPB6	EKAIPK	72	839197	542476	919139	504269	1.82272	0.866089	0.747889
						-1	1.78321	JL102921_110821_RPB4_C2_D.16302.16302.3	N	7.49925	0.23931		//18	15//72	5.58025	1.5	R.TVK[1091.68]EVQFGLFSPEEVR.A	YDL140C	1	RPB1	TVKEVQFGLFSPEEVR	15	//6	6//17	1.919	1.6	K.EK[2271.24]AIPK.D	YPR187W	1	RPB6	EKAIPK	72	1132006	751047	1.23961e+06	701504	1.76707	0.821358	0.703158
						0	0.817183	JL102921_110821_RPB4_C2_100B.17171.17171.3	N	7.07025	0.252239		//18	16//72	5.48775	1.43333	R.TVK[1091.68]EVQFGLFSPEEVR.A	YDL140C	1	RPB1	TVKEVQFGLFSPEEVR	15	//6	5//17	1.5825	1.2	K.EK[2271.24]AIPK.D	YPR187W	1	RPB6	EKAIPK	72	483742	304795	529920	281953	1.87946	0.91032	0.79212
						0	5.6586	JL102921_110821_RPB4_C2_70B.17086.17086.3	N	6.922	0.203245		//18	13//72	5.8665	1.5	R.TVK[1091.66]EVQFGLFSPEEVR.A	YDL140C	1	RPB1	TVKEVQFGLFSPEEVR	15	//6	4//17	1.0555	0.8	K.EK[2271.22]AIPK.D	YPR187W	1	RPB6	EKAIPK	72	403424	363437	440607	355693	1.23873	0.30886	0.19066
						0	-3.70315	JL102921_110821_RPB4_C2_30B.15108.15108.5	P	6.84325	0.289129	0.034	//18	21//124	6.27775	1.84375	R.TVK[1091.68]EVQFGLFSPEEVR.A	YDL140C	1	RPB1	TVKEVQFGLFSPEEVR	15	2//6	5//29	0.5655	0.583333	K.EK[2271.23]AIPK.D	YPR187W	1	RPB6	EKAIPK	72	587274	478883	642011	462416	1.38838	0.473405	0.355205
						0	4.64383	JL102921_110821_RPB4_C2_30B.14492.14492.6	P	6.7125	0.273767	0.157	//18	14//118	6.14	1.3125	R.TVK[1788.04]EVQFGLFSPEEVR.A	YDL140C	1	RPB1	TVKEVQFGLFSPEEVR	15	2//9	7//54	0.5725	0.611111	K.EK[2271.23]AIPK[425.27]DQR.A	YPR187W	1	RPB6	EKAIPKDQR	72	724771	441334	794143	405524	1.95831	0.969611	0.851411
						-2	7.68198	JL102921_110821_RPB4_C2_30B.15402.15402.3	NP	6.11825	0.190407	0.412	//18	12//72	4.46875	1.03125	R.TVK[1091.68]EVQFGLFSPEEVR.A	YDL140C	1	RPB1	TVKEVQFGLFSPEEVR	15	//6	5//17	1.6495	1	K.EK[2271.23]AIPK.D	YPR187W	1	RPB6	EKAIPK	72	346307	233103	379184	218292	1.73705	0.79664	0.67844
						0	-6.61724	JL102921_110821_RPB4_C2_100B.17107.17107.5	P	5.9685	0.236573	0.297	//18	18//124	5.22625	1.59375	R.TVK[1091.68]EVQFGLFSPEEVR.A	YDL140C	1	RPB1	TVKEVQFGLFSPEEVR	15	1//6	4//29	0.74225	0.75	K.EK[2271.23]AIPK.D	YPR187W	1	RPB6	EKAIPK	72	320238	295521	349668	290101	1.20533	0.269431	0.151231
						-1	19.3853	JL102921_110821_RPB4_C2_D.16297.16297.3	N	5.5145	0.180372		//18	14//72	4.59875	1.3	R.TVK[1091.62]EVQFGLFSPEEVR.A	YDL140C	1	RPB1	TVKEVQFGLFSPEEVR	15	//6	4//17	0.91575	0.9	K.EK[2271.18]AIPK.D	YPR187W	1	RPB6	EKAIPK	72	1096692	783283	1.20026e+06	741047	1.61968	0.695709	0.577509
						0	-1.85896	JL102921_110821_RPB4_C2_30B.15101.15101.3	NP	5.50325	0.173961	0.405	//18	16//72	4.07225	1.3125	R.TVK[1091.68]EVQFGLFSPEEVR.A	YDL140C	1	RPB1	TVKEVQFGLFSPEEVR	15	//6	5//17	1.431	1	K.EK[2271.23]AIPK.D	YPR187W	1	RPB6	EKAIPK	72	387360	281481	423882	267061	1.58721	0.666494	0.548294
						0	3.32731	JL102921_110821_RPB4_C2_100B.17125.17125.3	N	5.327	0.164224		1//18	15//72	3.707	1.06667	R.TVK[1091.67]EVQFGLFSPEEVR.A	YDL140C	1	RPB1	TVKEVQFGLFSPEEVR	15	//6	5//17	1.62	1.2	K.EK[2271.22]AIPK.D	YPR187W	1	RPB6	EKAIPK	72	448543	307338	491059	288716	1.70084	0.766246	0.648046
						709	-171.955	JL102921_110821_RPB4_C2_30B.15386.15386.3	P	5.18975	0.182503	0.718	//18	16//72	4.7595	1.3125	R.TVK[1091.68]EVQFGLFSPEEVR.A	YDL140C	1	RPB1	TVKEVQFGLFSPEEVR	15	1//6	3//17	0.43025	0.416667	K.EK[2271.23]AIPK.D	YPR187W	1	RPB6	EKAIPK	72	938156	748049	1.0258e+06	719989	1.42475	0.510707	0.392507
						1761	13.5924	JL102921_110821_RPB4_C2_C18.15799.15799.3	P	2.247	0.0738125	0.327	//18	6//66	1.8365	0.4375	R.TVK[1788.04]EVQFGLFSPEEVR.A	YDL140C	1	RPB1	TVKEVQFGLFSPEEVR	15	1//9	6//34	0.4105	0.611111	K.EK[2271.23]AIPK[425.27]DQR.A	YPR187W	1	RPB6	EKAIPKDQR	72	1.52294e+06	470680	1.67426e+06	348174	4.80868	2.26564	2.14744
	9	RPB1:1452---RPB6:129	9.99075	0.0329561	-0.0329561
						-2	3.75141	JL102921_110821_RPB4_C2_C18.31005.31005.5	P	9.99075	0.262231	0.668	//11	35//298	9.7955	1.34722	R.GVSENVILGQMAPIGTGAFDVMIDEESLVK[1244.84]YMPEQK.I	YDL140C	1	RPB1	GVSENVILGQMAPIGTGAFDVMIDEESLVKYMPEQK	1452	//8	3//39	0.19525	0.357143	K.K[4302.17]IPLVIR.R	YPR187W	1	RPB6	KIPLVIR	129	270723	288991	295127	288461	1.02311	0.0329561	-0.0852439
	10	RPB1:924---RPB6:76	7.7395	0.0385076	-0.0385076
						0	14.1526	JL102921_110821_RPB4_C2_D.41113.41113.6	N	7.7395	0.189045		//7	23//225	6.77075	0.675676	R.YRVDLLNTDHTLDPSLLESGSEILGDLK[1472.94]LQVLLDEEYK.Q	YDL140C	1	RPB1	YRVDLLNTDHTLDPSLLESGSEILGDLKLQVLLDEEYK	924	1//10	5//35	0.96875	0.714286	K.E[111.03]KAIPK[4750.58]DQR.A	YPR187W	1	RPB6	EKAIPKDQR	76	249348	265259	271836	264676	1.02705	0.0385076	-0.0796924
6	RPB1---RPB7
	1	RPB1:2---RPB7:29	15.213	1.2348	-1.2348
						-1	2.54672	JL102921_110821_RPB4_C2_70B.14499.14499.4	N	15.213	0.513562		//14	28//76	12.2468	3.5	K.TK[1611.87]LLEEVEGSC[160.03]TGK.F	YDR404C	1	RPB7	TKLLEEVEGSCTGK	29	//	11//35	2.96625	0.825	M.V[1927.99]GQQYSSAPLR.T	YDL140C	1	RPB1	VGQQYSSAPLR	2	641186	475215	701527	452308	1.551	0.633194	0.514994
						-2	4.54083	JL102921_110821_RPB4_C2_50B.17784.17784.4	N	14.919	0.495911		//14	25//76	11.7088	3.15385	K.TK[1611.87]LLEEVEGSC[160.03]TGK.F	YDR404C	1	RPB7	TKLLEEVEGSCTGK	29	//	10//35	3.21025	0.75	M.V[1927.99]GQQYSSAPLR.T	YDL140C	1	RPB1	VGQQYSSAPLR	2	1.04737e+06	851508	1.14502e+06	821877	1.39318	0.478382	0.360182
						0	1.31148	JL102921_110821_RPB4_C2_D.14002.14002.3	N	14.6935	0.445082		1//14	23//56	12.0315	2.96154	K.TK[1611.88]LLEEVEGSC[160.03]TGK.F	YDR404C	1	RPB7	TKLLEEVEGSCTGK	29	//	9//24	2.662	0.8	M.V[1928]GQQYSSAPLR.T	YDL140C	1	RPB1	VGQQYSSAPLR	2	982600	414148	1.07889e+06	346539	3.11333	1.63846	1.52026
						0	2.24139	JL102921_110821_RPB4_C2_50B.17790.17790.4	N	14.152	0.493901		//14	27//76	11.9	3.53846	K.TK[1611.87]LLEEVEGSC[160.03]TGK.F	YDR404C	1	RPB7	TKLLEEVEGSCTGK	29	//	8//35	2.252	0.6	M.V[1927.99]GQQYSSAPLR.T	YDL140C	1	RPB1	VGQQYSSAPLR	2	734661	585272	803303	563245	1.42621	0.512181	0.393981
						-1	2.72735	JL102921_110821_RPB4_C2_D.14061.14061.3	N	13.8908	0.421743		//14	21//56	11.542	2.92308	K.TK[1611.89]LLEEVEGSC[160.03]TGK.F	YDR404C	1	RPB7	TKLLEEVEGSCTGK	29	//	9//24	2.34875	0.65	M.V[1928.01]GQQYSSAPLR.T	YDL140C	1	RPB1	VGQQYSSAPLR	2	886629	375238	973495	314392	3.09644	1.63061	1.51241
						0	4.48307	JL102921_110821_RPB4_C2_C18.14084.14084.3	N	13.0025	0.397466		//14	19//56	10.3405	2.61538	K.TK[1611.89]LLEEVEGSC[160.03]TGK.F	YDR404C	1	RPB7	TKLLEEVEGSCTGK	29	//	12//24	2.662	0.925	M.V[1928.01]GQQYSSAPLR.T	YDL140C	1	RPB1	VGQQYSSAPLR	2	458629	141504	504202	104586	4.82092	2.26931	2.15111
						0	1.25112	JL102921_110821_RPB4_C2_70B.14503.14503.3	N	11.8052	0.350976		1//14	22//56	9.4185	2.84615	K.TK[1611.88]LLEEVEGSC[160.03]TGK.F	YDR404C	1	RPB7	TKLLEEVEGSCTGK	29	//	11//24	2.38675	0.85	M.V[1928]GQQYSSAPLR.T	YDL140C	1	RPB1	VGQQYSSAPLR	2	438375	175202	481450	144050	3.34225	1.74082	1.62262
						-1	7.53051	JL102921_110821_RPB4_C2_70B.14493.14493.3	N	11.209	0.33837		1//14	22//56	9.276	2.84615	K.TK[1611.86]LLEEVEGSC[160.03]TGK.F	YDR404C	1	RPB7	TKLLEEVEGSCTGK	29	//	12//24	1.933	0.875	M.V[1927.98]GQQYSSAPLR.T	YDL140C	1	RPB1	VGQQYSSAPLR	2	372040	148717	408597	122281	3.34146	1.74048	1.62228
						-2	0.526075	JL102921_110821_RPB4_C2_D.14083.14083.4	N	10.5188	0.346959		//14	20//76	8.52675	2.38462	K.TK[1611.88]LLEEVEGSC[160.03]TGK.F	YDR404C	1	RPB7	TKLLEEVEGSCTGK	29	//	7//35	1.992	0.6	M.V[1928]GQQYSSAPLR.T	YDL140C	1	RPB1	VGQQYSSAPLR	2	1.53299e+06	1.26018e+06	1.67575e+06	1.21824e+06	1.37555	0.460007	0.341807
						0	4.36235	JL102921_110821_RPB4_C2_100B.14720.14720.3	N	8.4785	0.29494		1//14	15//56	6.6005	1.76923	K.TK[1611.89]LLEEVEGSC[160.03]TGK.F	YDR404C	1	RPB7	TKLLEEVEGSCTGK	29	//	9//24	1.878	0.8	M.V[1928.01]GQQYSSAPLR.T	YDL140C	1	RPB1	VGQQYSSAPLR	2	238888	124548	262008	110580	2.36939	1.24452	1.12632
7	RPB1---RPB8
	1	RPB1:461---RPB8:136	5.465	-0.279094	0.279094
						-1	1.36507	JL102921_110821_RPB4_C2_30B.18434.18434.5	N	5.465	0.178636		1//17	14//108	3.9585	1.39286	R.NLNNLK[1615.96]QENAYLLIR.R	YOR224C	1	RPB8	NLNNLKQENAYLLIR	136	//10	8//54	1.5065	1	R.VK[2222.27]VIPYSTFR.L	YDL140C	1	RPB1	VKVIPYSTFR	461	252499	342917	274368	350017	0.783871	-0.351312	-0.469512
						-3	4.19008	JL102921_110821_RPB4_C2_30B.18458.18458.4	NP	5.327	0.149379	0.169	//17	17//84	4.171	1.43333	R.NLNNLK[1615.95]QENAYLLIR.R	YOR224C	1	RPB8	NLNNLKQENAYLLIR	136	1//10	7//44	1.156	0.6	R.VK[2222.26]VIPYSTFR.L	YDL140C	1	RPB1	VKVIPYSTFR	461	413038	512134	449405	518696	0.866412	-0.206875	-0.325075
	2	RPB1:533---RPB8:22	3.65475	-0.416364	0.416364
						0	3.36825	JL102921_110821_RPB4_C2_30B.07573.07573.4	N	3.65475	0.153661		//8	7//28	2.28275	1.4	R.YNK[1036.69]VC[160.03]R.I	YOR224C	1	RPB8	YNKVCR	22	//6	6//26	1.372	1.4	R.K[1245.68]LTLR.D	YDL140C	1	RPB1	KLTLR	533	1.99611e+06	2.80225e+06	2.16788e+06	2.86783e+06	0.755932	-0.403671	-0.521871
						0	1.52293	JL102921_110821_RPB4_C2_50B.08511.08511.4	N	3.31575	0.160394		//8	7//28	2.298	1.4	R.YNK[1036.68]VC[160.03]R.I	YOR224C	1	RPB8	YNKVCR	22	//6	4//26	1.01775	0.9	R.K[1245.67]LTLR.D	YDL140C	1	RPB1	KLTLR	533	997904	1.22543e+06	1.08591e+06	1.24006e+06	0.875694	-0.191501	-0.309701
						-58	7.64575	JL102921_110821_RPB4_C2_C18.06625.06625.4	P	1.11175	0.0429803	0.41	//8	4//27	0.29725	0.333333	R.YNK[1036.68]VCR.I	YOR224C	1	RPB8	YNKVCR	22	//6	5//25	0.8145	1	R.K[1188.65]LTLR.D	YDL140C	1	RPB1	KLTLR	533	628321	924959	681868	950040	0.717726	-0.478495	-0.596695
						-59	8.4403	JL102921_110821_RPB4_C2_30B.07511.07511.4	P	0.6095	0.0312228	0.309	//8	2//27	0.11	0.166667	R.YNK[1036.68]VCR.I	YOR224C	1	RPB8	YNKVCR	22	//6	2//25	0.4995	0.4	R.K[1188.65]LTLR.D	YDL140C	1	RPB1	KLTLR	533	862401	1.36451e+06	934743	1.40876e+06	0.66352	-0.591788	-0.709988
	3	RPB1:977---RPB8:136	6.41425	0.671839	-0.671839
						-1	2.93191	JL102921_110821_RPB4_C2_30B.16794.16794.6	P	6.41425	0.190923	0.596	//15	9//171	1.21275	0.295455	R.IIQNAQQTFHIDHTK[2222.26]PSDLTIK.D	YDL140C	1	RPB1	IIQNAQQTFHIDHTKPSDLTIK	977	1//17	17//108	5.2015	1.53333	R.NLNNLK[2954.61]QENAYLLIR.R	YOR224C	1	RPB8	NLNNLKQENAYLLIR	136	616742	473997	674577	453712	1.4868	0.572207	0.454007
						-1	3.44114	JL102921_110821_RPB4_C2_30B.16782.16782.5	N	6.096	0.159583		//15	16//171	3.6305	0.952381	R.IIQNAQQTFHIDHTK[2222.28]PSDLTIK.D	YDL140C	1	RPB1	IIQNAQQTFHIDHTKPSDLTIK	977	3//17	15//108	2.4655	1.28571	R.NLNNLK[2954.62]QENAYLLIR.R	YOR224C	1	RPB8	NLNNLKQENAYLLIR	136	371305	241750	406655	225024	1.80716	0.853725	0.735525
						-1	1.98513	JL102921_110821_RPB4_C2_30B.16786.16786.6	P	5.32025	0.161902	0.61	//15	11//171	1.88725	0.5	R.IIQNAQQTFHIDHTK[2222.26]PSDLTIK.D	YDL140C	1	RPB1	IIQNAQQTFHIDHTKPSDLTIK	977	1//17	10//108	3.433	0.833333	R.NLNNLK[2954.61]QENAYLLIR.R	YOR224C	1	RPB8	NLNNLKQENAYLLIR	136	659858	501905	721801	479661	1.50481	0.589586	0.471386
8	RPB1---RPB9
	1	RPB1:403---RPB9:77	5.99425	-0.533426	0.533426
						0	0.679424	JL102921_110821_RPB4_C2_50B.07061.07061.5	N	5.99425	0.165873		//16	14//93	4.41575	1.38462	R.NGPNEHPGAK[1837.88]YVIR.D	YDL140C	1	RPB1	NGPNEHPGAKYVIR	403	//13	9//70	1.5785	0.95	R.SDREC[160.03]PK[1958.06]C[160.03]HSR.E	YGL070C	1	RPB9	SDRECPKCHSR	77	121876	162427	132469	165534	0.800254	-0.32147	-0.43967
						0	0.866615	JL102921_110821_RPB4_C2_70B.05596.05596.5	N	5.44275	0.158936		//16	17//93	4.47025	1.69231	R.NGPNEHPGAK[1837.88]YVIR.D	YDL140C	1	RPB1	NGPNEHPGAKYVIR	403	//13	8//70	0.9725	0.7	R.SDREC[160.03]PK[1958.06]C[160.03]HSR.E	YGL070C	1	RPB9	SDRECPKCHSR	77	120213	209833	130058	218032	0.59651	-0.745383	-0.863583
	2	RPB1:1286---RPB9:77	5.18425	1.10143	-1.10143
						0	0.466251	JL102921_110821_RPB4_C2_70B.04192.04192.5	N	5.18425	0.180567		//13	9//70	2.061	1.05	R.SDREC[160.03]PK[1479.76]C[160.03]HSR.E	YGL070C	1	RPB9	SDRECPKCHSR	77	//10	10//43	3.12325	1.78571	R.VVM[147.04]M[147.04]K[1837.87]YDR.K	YDL140C	1	RPB1	VVMMKYDR	1286	281554	156603	308684	141156	2.18684	1.12885	1.01065
						0	0.0821759	JL102921_110821_RPB4_C2_100B.04332.04332.5	N	5.1025	0.185911		//13	8//70	2.0235	1	R.SDREC[160.03]PK[1479.77]C[160.03]HSR.E	YGL070C	1	RPB9	SDRECPKCHSR	77	//10	9//43	3.079	1.71429	R.VVM[147.04]M[147.04]K[1837.88]YDR.K	YDL140C	1	RPB1	VVMMKYDR	1286	269318	145868	295316	130685	2.25975	1.17616	1.05796
						0	0.643992	JL102921_110821_RPB4_C2_70B.05222.05222.5	N	4.70525	0.159806		//13	8//70	1.9475	1	R.SDREC[160.03]PK[1463.77]C[160.03]HSR.E	YGL070C	1	RPB9	SDRECPKCHSR	77	//10	10//43	2.75775	1.78571	R.VVMM[147.04]K[1837.88]YDR.K	YDL140C	1	RPB1	VVMMKYDR	1286	782409	468400	857395	428911	1.999	0.999282	0.881082
	3	RPB1:1246---RPB9:20	13.2895	1.21234	-1.21234
						0	0.494367	JL102921_110821_RPB4_C2_C18.08390.08390.5	NP	13.2895	0.347216	0.0088	//17	33//158	12.0715	2.5	R.VVRPK[1310.67]SLDAETEAEEDHMLK.K	YDL140C	1	RPB1	VVRPKSLDAETEAEEDHMLK	1246	//9	6//35	1.218	1	R.EDK[2703.4]ENNR.L	YGL070C	1	RPB9	EDKENNR	20	808453	332142	887782	275625	3.22098	1.6875	1.5693
						-1	6.4199	JL102921_110821_RPB4_C2_C18.08394.08394.5	N	13.2455	0.339498		//17	34//158	12.215	2.71053	R.VVRPK[1310.69]SLDAETEAEEDHMLK.K	YDL140C	1	RPB1	VVRPKSLDAETEAEEDHMLK	1246	1//9	7//35	1.0305	1.25	R.EDK[2703.42]ENNR.L	YGL070C	1	RPB9	EDKENNR	20	800255	321730	878865	265057	3.31575	1.72934	1.61114
						-1	2.26645	JL102921_110821_RPB4_C2_C18.08398.08398.5	NP	12.266	0.309521	0.0632	//17	32//158	11.2225	2.4	R.VVRPK[1310.67]SLDAETEAEEDHMLK.K	YDL140C	1	RPB1	VVRPKSLDAETEAEEDHMLK	1246	//9	6//35	1.0435	1.14286	R.EDK[2703.4]ENNR.L	YGL070C	1	RPB9	EDKENNR	20	827641	376104	908414	321979	2.82135	1.49638	1.37818
						0	0.481531	JL102921_110821_RPB4_C2_50B.09815.09815.5	NP	8.5075	0.252078	0.732	//17	25//158	7.5	1.725	R.VVRPK[1310.67]SLDAETEAEEDHM[147.04]LK.K	YDL140C	1	RPB1	VVRPKSLDAETEAEEDHMLK	1246	//9	5//35	1.0075	0.928571	R.EDK[2719.39]ENNR.L	YGL070C	1	RPB9	EDKENNR	20	767561	459268	841128	420503	2.00029	1.00021	0.882008
[truncated: 467 more rows]

## Sheet: Intralinks_Exp_I
index	Protein-protein	Crosslinkingsites	Xcorr	Average(log2(127/126))	Average(log2(126/127))	Da	ppm	spectrum	engine	xcorr	Xcorr_norm	expect	immonium1	ion1	dot1	connective1	peptide1	protein1	Unique_protein1	subunit1	realpep1	position1	immonium2	ion2	dot2	connective2	peptide2	protein2	Unique_protein2	subunit2	realpep2	position2	Q2link0intensity	Q2link1intensity	corrected_126	Corrected_127	ratio127/126	log2ratio127/126	adjustedLog2127/126
[truncated: 4,342 more rows]

[truncated: 3 more sheets: Intralink_Exp_II, Monolinks_Exp_I, Monolinks_Exp_II]
